# Supplementary material for: Proteomic Analysis of the Venom of Jellyfishes Rhopilema esculentum and Sanderia malayensis
Source: Mar Drugs. 2020 Dec 21;18(12):655. doi: 10.3390/md18120655 (PMC7766711; doi:10.3390/md18120655)
Supplement: Supplementary file 1 [file marinedrugs-18-00655-s001.xlsx]

## Sheet: Table S1_Predicted_Toxin_R.es
			BLASTp (Tox-Prot)					BLASTp (Uniprot)					BLASTp (nr)					eggNOG mapper							DeepLoc		SignalP
Sequence name	Toxin Family	Sequence length	Hit ACC	Sequence desc.	E-Value	Similarity	Bit-Score	Hit ACC	Sequence desc.	E-Value	Similarity	Bit-Score	Hit ACC	Sequence desc.	E-Value	Similarity	Bit-Score	EggNOG Description	E-Value	Bit-Score	EC Codes	#GO	GOs	GO Names	Localization	Type	Prediction	SP(Sec/SPI)
Res_003731-T1	Protease Inhibitors	528	P0C8W3	Kunitz-type serine protease inhibitor Hg1 (Delta-KTx 1.1)	1.09e-14	71.6981	65.855	P0C8W3	Kunitz-type serine protease inhibitor Hg1 (Delta-KTx 1.1)	2.58e-12	71.6981	65.855	PFX15746	eppin isoform X1	8.64485e-25	46.9388	121.324	negative regulation of serine-type peptidase activity	5.3e-21	109.4	0	0	0	0	Extracellular	Soluble	SP(Sec/SPI)	0.99779
Res_011667-T1	Phospholipases	140	Q9BMK4	Phospholipase A2 (PLA2) (EC 3.1.1.4) (Phosphatidylcholine 2-acylhydrolase) (allergen Api c 1)	3.01e-26	56.5217	92.4337	Q9BMK4	Phospholipase A2 (PLA2) (EC 3.1.1.4) (Phosphatidylcholine 2-acylhydrolase) (allergen Api c 1)	7.12e-24	56.5217	92.4337	XP_029427127	group 3 secretory phospholipase A2	6.45037e-26	60.5263	112.849	Phospholipase A2, group III	6.2e-22	110.5	EC:3.1.1.4	11	P:GO:0060271; P:GO:0036151; P:GO:0036152; C:GO:0005886; C:GO:0005623; C:GO:0005615; P:GO:0036148; C:GO:0005737; C:GO:0005814; F:GO:0047498; P:GO:0097164	C:centriole; C:extracellular space; C:obsolete cell; P:phosphatidylcholine acyl-chain remodeling; F:calcium-dependent phospholipase A2 activity; C:cytoplasm; P:phosphatidylglycerol acyl-chain remodeling; P:cilium assembly; P:ammonium ion metabolic process; P:phosphatidylethanolamine acyl-chain remodeling; C:plasma membrane	Extracellular	Soluble	SP(Sec/SPI)	0.99913
Res_010803-T1	Phospholipases	152	Q9DF52	Basic phospholipase A2 KPA2 (svPLA2) (EC 3.1.1.4) (Phosphatidylcholine 2-acylhydrolase)	8.92e-26	49.6552	92.0485	Q8JFB2	Phospholipase A2 GL16-1 (EC 3.1.1.4) (Phosphatidylcholine 2-acylhydrolase) (pkP5)	6.86e-24	46.9799	93.5893	XP_004208832	phospholipase A2	2.96111e-27	63.3333	108.612	low-density lipoprotein particle remodeling	6.6e-25	120.6	EC:3.1.1.4	12	F:GO:0004623; P:GO:0036150; P:GO:0006654; P:GO:0036151; P:GO:0036152; C:GO:0005576; P:GO:0043062; P:GO:0034374; P:GO:0036148; P:GO:0036149; P:GO:0006954; P:GO:0097164	P:inflammatory response; P:extracellular structure organization; P:phosphatidic acid biosynthetic process; F:phospholipase A2 activity; P:phosphatidylinositol acyl-chain remodeling; P:phosphatidylcholine acyl-chain remodeling; C:extracellular region; P:phosphatidylglycerol acyl-chain remodeling; P:ammonium ion metabolic process; P:phosphatidylethanolamine acyl-chain remodeling; P:low-density lipo…	Extracellular	Soluble	SP(Sec/SPI)	0.995494
Res_013931-T1	Protease Inhibitors	87	P25660	Kunitz-type serine protease inhibitor IX (Bungarus fasciatus fraction IX) (BF9) (Venom basic protease inhibitor IX) [Cleaved into: Kunitz-type serine protease inhibitor VIIIB (Venom basic protease inhibitor VIIIB)]	3.4e-19	71.1538	70.4774	P25660	Kunitz-type serine protease inhibitor IX (Bungarus fasciatus fraction IX) (BF9) (Venom basic protease inhibitor IX) [Cleaved into: Kunitz-type serine protease inhibitor VIIIB (Venom basic protease inhibitor VIIIB)]	8.06e-17	71.1538	70.4774	PRD26526	tissue factor pathway inhibitor	2.15521e-17	65.3333	79.337	Tissue factor pathway inhibitor	6.6e-14	83.2	0	1	C:GO:0005576	C:extracellular region	Extracellular	Soluble	SP(Sec/SPI)	0.99973
Res_000021-T1	Proteases	323	K7Z9Q9	Nematocyst expressed protein 6 (NEP-6) (EC 3.4.24.-) (Astacin-like metalloprotease toxin)	1.57e-37	51.6129	132.109	P55112	Zinc metalloproteinase nas-4 (EC 3.4.24.-) (Nematode astacin 4)	3.02e-46	55.8559	161.77	XP_031571615	zinc metalloproteinase nas-4-like	1.21671e-57	59.9222	201.445	Astacin (Peptidase family M12A)	1.7e-46	193.4	0	0	0	0	Lysosome/Vacuole	Soluble	SP(Sec/SPI)	0.644973
Res_000190-T1	Hemostasis impairing toxins	252	D8VNS9	Ryncolin-3	2.44e-11	53.3333	58.9214	P22105	Tenascin-X (TN-X) (Hexabrachion-like protein)	4.22e-10	43.5065	63.1586	XP_031552426	protein sax-3-like	1.00052e-14	43.4783	84.7297	complement activation, lectin pathway	1.6e-12	80.1	0	0	0	0	Extracellular	Soluble	SP(Sec/SPI)	0.983297
Res_000463-T1	Protease Inhibitors	149	B1P1J3	Cystatin-1 (Cystatin JZTX-75)	3.46e-18	52.5926	72.0182	B1P1J3	Cystatin-1 (Cystatin JZTX-75)	8.2e-16	52.5926	72.0182	XP_034040344	cystatin-like	2.06202e-13	51.145	73.1738	Cystatin-like	5.5e-08	64.3	0	0	0	0	Extracellular	Soluble	SP(Sec/SPI)	0.978637
Res_000497-T1	Hemostasis impairing toxins	275	D8VNS8	Ryncolin-2	6.34e-37	55.914	130.568	Q9U8W8	Techylectin-5A	7.6e-38	56.6502	137.887	KOF87216	fibrinogen-like protein 1	9.1066e-44	58.8785	157.918	negative regulation of axon extension involved in regeneration	3.3e-35	155.6	0	20	C:GO:0072534; P:GO:0007158; P:GO:0007411; P:GO:0051971; P:GO:0030198; C:GO:0045121; P:GO:0008306; P:GO:0022029; P:GO:0050805; P:GO:0060291; C:GO:0009986; P:GO:0022408; P:GO:0050808; F:GO:0046625; C:GO:0005623; P:GO:0050885; P:GO:0035641; F:GO:0005178; P:GO:0048692; P:GO:0051968	C:perineuronal net; P:long-term synaptic potentiation; P:associative learning; C:membrane raft; F:integrin binding; F:sphingolipid binding; P:positive regulation of synaptic transmission, glutamatergic; P:extracellular matrix organization; P:negative regulation of cell-cell adhesion; C:cell surface; P:negative regulation of axon extension involved in regeneration; P:synapse organization; P:positi…	Extracellular	Soluble	OTHER	0.001469
Res_000512-T1	Hemostasis impairing toxins	374	D8VNT0	Ryncolin-4	4.29e-53	59.0308	176.022	P57756	Ficolin-2 (Collagen/fibrinogen domain-containing protein 2) (Ficolin-B) (Ficolin-beta) (L-ficolin)	3.63e-58	60.2679	194.512	XP_028418010	microfibril-associated glycoprotein 4-like	9.58358e-66	65.0224	220.32	Fibrinogen-related domains (FReDs)	2.2e-50	206.5	0	0	0	0	Extracellular	Soluble	OTHER	0.342704
Res_000518-T1	Hemostasis impairing toxins	436	D8VNT0	Ryncolin-4	1.05e-45	58.8785	158.303	P57756	Ficolin-2 (Collagen/fibrinogen domain-containing protein 2) (Ficolin-B) (Ficolin-beta) (L-ficolin)	5.27e-51	57.8059	177.948	XP_028397795	microfibril-associated glycoprotein 4-like	8.99655e-59	53.0899	206.068	Fibrinogen-related domains (FReDs)	7.3e-45	188.3	0	0	0	0	Extracellular	Soluble	OTHER	0.000587
Res_000519-T1	Hemostasis impairing toxins	525	D8VNT0	Ryncolin-4	6.48e-52	60.6481	176.792	O00602	Ficolin-1 (Collagen/fibrinogen domain-containing protein 1) (Ficolin-A) (Ficolin-alpha) (M-ficolin)	4.4e-57	61.991	196.438	XP_028418010	microfibril-associated glycoprotein 4-like	3.80065e-61	63.8009	213.001	Fibrinogen-related domains (FReDs)	7.7e-49	201.8	0	0	0	0	Extracellular	Soluble	OTHER	0.019115
Res_000520-T1	Hemostasis impairing toxins	401	D8VNT0	Ryncolin-4	9.4e-56	62.6728	183.726	P57756	Ficolin-2 (Collagen/fibrinogen domain-containing protein 2) (Ficolin-B) (Ficolin-beta) (L-ficolin)	3.8e-58	60.9865	195.282	XP_028418010	microfibril-associated glycoprotein 4-like	1.18381e-64	64.4144	218.394	cell surface pattern recognition receptor signaling pathway	2.4e-50	206.5	0	0	0	0	Extracellular	Soluble	OTHER	0.023785
Res_000624-T1	Proteases	875	W4VS99	Neprilysin-1 (EC 3.4.24.-)	1.61e-119	52.1307	375.941	Q8IS64	Endothelin-converting enzyme homolog (ECE) (EC 3.4.24.-)	4.61e-166	59.8561	503.442	XP_002155074	endothelin-converting enzyme 1-like	0	79.7994	986.482	Metalloendopeptidase activity. It is involved in the biological process described with proteolysis	1.5e-275	955.7	0	0	0	0	Endoplasmic reticulum	Membrane	SP(Sec/SPI)	0.823521
Res_000626-T1	Other toxins	496	X2JCV5	L-amino acid oxidase (CC-LAAO) (LAO) (EC 1.4.3.2)	1.07e-13	40.8989	69.3218	O64411	Polyamine oxidase 1 (EC 1.5.3.14) (EC 1.5.3.15)	2.01e-72	53.3477	241.121	KXJ12191	polyamine oxidase-like	1.83904e-108	57.4153	340.887	Flavin containing amine oxidoreductase	1.2e-80	307.4	EC:1.5.3.16; EC:1.5.3.14	0	0	0	Endoplasmic reticulum	Membrane	SP(Sec/SPI)	0.872997
Res_000626-T2	Other toxins	373	X2JCV5	L-amino acid oxidase (CC-LAAO) (LAO) (EC 1.4.3.2)	5.66e-13	44.6565	66.2402	A0A0P0XM10	Polyamine oxidase 6 (OsPAO6) (EC 1.5.3.-) (Polyamine oxidase B)	3.7e-57	55.3746	196.823	EDO45214	polyamine oxidase-like	7.22129e-77	58.309	254.218	Flavin containing amine oxidoreductase	6.7e-63	248.1	EC:1.5.3.16; EC:1.5.3.14	0	0	0	Endoplasmic reticulum	Membrane	OTHER	0.001238
Res_000992-T1	Phospholipases	239	P80003	Acidic phospholipase A2 PA4 (PLA2) (EC 3.1.1.4) (Phosphatidylcholine 2-acylhydrolase) [Cleaved into: Acidic phospholipase A2 PA2]	1.01e-15	51.8182	68.1662	P80003	Acidic phospholipase A2 PA4 (PLA2) (EC 3.1.1.4) (Phosphatidylcholine 2-acylhydrolase) [Cleaved into: Acidic phospholipase A2 PA2]	2.4e-13	51.8182	68.1662	XP_002165160	Hypothetical predicted protein	3.11517e-22	50.9934	106.301	Phospholipase A2	1.2e-12	80.5	EC:3.1.1.4	0	0	0	Extracellular	Soluble	SP(Sec/SPI)	0.876299
Res_001017-T1	Hemostasis impairing toxins	4333	Q7SZN0	Venom prothrombin activator pseutarin-C non-catalytic subunit (PCNS) (vPA) (Venom coagulation factor Va-like protein) [Cleaved into: Pseutarin-C non-catalytic subunit heavy chain; Pseutarin-C non-catalytic subunit light chain]	1.7e-15	51.5337	80.1073	Q2PZL6	Protocadherin Fat 4 (FAT tumor suppressor homolog 4) (Fat-like cadherin protein FAT-J)	0	46.8471	955.666	XP_020903962	protocadherin Fat 4	0	57.7508	2947.15	Protocadherin Fat	0	1291.2	0	16	P:GO:0035329; P:GO:0007157; P:GO:0008543; P:GO:0003007; P:GO:0007009; P:GO:0043931; P:GO:0007219; C:GO:0045177; P:GO:0072307; P:GO:0021987; P:GO:0001658; P:GO:0001736; P:GO:0072137; P:GO:0060122; C:GO:0005623; P:GO:0048565	P:ossification involved in bone maturation; P:Notch signaling pathway; P:digestive tract development; P:cerebral cortex development; P:establishment of planar polarity; P:hippo signaling; P:fibroblast growth factor receptor signaling pathway; P:regulation of metanephric nephron tubule epithelial cell differentiation; P:plasma membrane organization; P:branching involved in ureteric bud morphogenes…	Cell membrane	Membrane	OTHER	0.001214
Res_001025-T1	Neurotoxin	1748	Q25338	Delta-latroinsectotoxin-Lt1a (Delta-LIT-Lt1a) (Delta-latroinsectotoxin) (Delta-LIT)	2.79e-12	50.7463	68.1662	Q38SD2	Leucine-rich repeat serine/threonine-protein kinase 1 (EC 2.7.11.1)	4.82e-117	46.1993	414.846	XP_012555367	leucine-rich repeat serine/threonine-protein kinase 2-like	0	50.5419	736.873	leucine-rich repeat serine threonine-protein kinase	6.8e-150	539.3	EC:2.7.11.1	0	0	0	Cytoplasm	Soluble	OTHER	0.000591
Res_001043-T1	Proteases	103	B5U2W0	Venom serine protease Bi-VSP (EC 3.4.21.-) (Thrombin-like enzyme)	2.03e-12	56.6265	57.7658	P08217	Chymotrypsin-like elastase family member 2A (EC 3.4.21.71) (Elastase-2A)	7.23e-18	51.7544	78.5666	AAO12214	chymotrypsin B-like	1.25575e-54	87.1287	178.333	Belongs to the peptidase S1 family	8.4e-16	89.7	EC:3.4.21.2; EC:3.4.21.71; EC:3.4.21.99	0	0	0	Extracellular	Soluble	OTHER	0.007961
Res_001294-T1	Other toxins	481	Q4JHE1	L-amino-acid oxidase (LAAO) (LAO) (EC 1.4.3.2)	3.66e-13	41.9624	67.3958	Q9LYT1	Polyamine oxidase 3 (AtPAO3) (EC 1.5.3.17)	7.24e-18	43.361	89.3521	XP_015758903	peroxisomal N(1)-acetyl-spermine/spermidine oxidase isoform X2	2.63124e-93	55.4192	301.982	Flavin containing amine oxidoreductase	1.2e-64	254.2	EC:1.5.3.16; EC:1.5.3.14	0	0	0	Peroxisome	Soluble	OTHER	0.261952
Res_001362-T1	Hemostasis impairing toxins	585	D8VNS8	Ryncolin-2	1.37e-65	64.186	214.542	O70497	Ficolin-2 (Collagen/fibrinogen domain-containing protein 2) (Ficolin-B) (Ficolin-beta) (L-ficolin)	4.98e-72	68.0952	236.498	XP_028512828	titin isoform X1	6.39274e-100	60.5985	327.791	cell surface pattern recognition receptor signaling pathway	2.3e-65	256.9	0	0	0	0	Extracellular	Soluble	OTHER	0.01857
Res_001704-T1	Phospholipases	147	P16354	Phospholipase A2 isozymes PA3A/PA3B/PA5 (PLA2) (EC 3.1.1.4) (Phosphatidylcholine 2-acylhydrolase)	4.43e-32	60.396	107.842	P16354	Phospholipase A2 isozymes PA3A/PA3B/PA5 (PLA2) (EC 3.1.1.4) (Phosphatidylcholine 2-acylhydrolase)	1.05e-29	60.396	107.842	AOT85611, AOT85613	group 3 secretory phospholipase A2-like	1.05717e-37	69.2982	135.961	Phospholipase A2	2e-23	115.5	EC:3.1.1.4	0	0	0	Extracellular	Soluble	SP(Sec/SPI)	0.998497
Res_001705-T1	Phospholipases	167	P16354	Phospholipase A2 isozymes PA3A/PA3B/PA5 (PLA2) (EC 3.1.1.4) (Phosphatidylcholine 2-acylhydrolase)	9.02e-23	56.701	84.7297	P16354	Phospholipase A2 isozymes PA3A/PA3B/PA5 (PLA2) (EC 3.1.1.4) (Phosphatidylcholine 2-acylhydrolase)	2.14e-20	56.701	84.7297	AOT85611, AOT85613	acidic phospholipase A2 PA4	2.40257e-28	64.0351	112.849	Phospholipase A2	7.7e-19	100.5	EC:3.1.1.4	0	0	0	Extracellular	Soluble	OTHER	0.000846
Res_001706-T1	Phospholipases	150	P80003	Acidic phospholipase A2 PA4 (PLA2) (EC 3.1.1.4) (Phosphatidylcholine 2-acylhydrolase) [Cleaved into: Acidic phospholipase A2 PA2]	4.48e-32	61.2245	108.227	P80003	Acidic phospholipase A2 PA4 (PLA2) (EC 3.1.1.4) (Phosphatidylcholine 2-acylhydrolase) [Cleaved into: Acidic phospholipase A2 PA2]	1.06e-29	61.2245	108.227	AOT85611, AOT85613	protein PROCA1	9.88883e-48	77.193	161.384	Phospholipase A2	8.4e-25	120.2	EC:3.1.1.4	0	0	0	Extracellular	Soluble	SP(Sec/SPI)	0.996064
Res_001732-T1	Hemostasis impairing toxins	316	D8VNT0	Ryncolin-4	5.34e-49	54.5455	163.696	O70165	Ficolin-1 (Collagen/fibrinogen domain-containing protein 1) (Ficolin-A) (Ficolin-alpha) (M-ficolin)	1.1e-51	59.1549	176.407	XP_029205057	microfibril-associated glycoprotein 4-like	2.521e-64	60	214.542	mesenchymal-epithelial cell signaling involved in prostate gland development	6.5e-51	208	0	16	P:GO:0060739; P:GO:0010628; P:GO:0030198; P:GO:0060740; P:GO:0007528; P:GO:0060447; F:GO:0001968; P:GO:0043687; P:GO:0014012; C:GO:0005623; C:GO:0005788; P:GO:0007162; P:GO:0008284; C:GO:0005614; F:GO:0045545; C:GO:0005604	P:prostate gland epithelium morphogenesis; C:interstitial matrix; P:mesenchymal-epithelial cell signaling involved in prostate gland development; C:basement membrane; C:endoplasmic reticulum lumen; P:negative regulation of cell adhesion; P:positive regulation of cell population proliferation; F:syndecan binding; P:bud outgrowth involved in lung branching; P:extracellular matrix organization; P:po…	Extracellular	Soluble	SP(Sec/SPI)	0.667778
Res_001739-T1	Hemostasis impairing toxins	164	E2IYB3	Veficolin-1 (Fragment)	2.14e-13	83.7838	61.6178	A0A8J8	Angiopoietin-2 (ANG-2)	2.29e-15	66.1538	75.485	XP_029189660	microfibril-associated glycoprotein 4-like	5.28219e-18	59.8131	89.7373	negative regulation of positive chemotaxis	2.4e-12	79	0	28	P:GO:0010812; P:GO:0001666; P:GO:0060135; C:GO:0042995; P:GO:0009749; P:GO:0043537; C:GO:0005634; P:GO:0007492; C:GO:0005615; P:GO:0009612; P:GO:0009314; P:GO:0030097; P:GO:0031100; F:GO:0030971; P:GO:0071363; P:GO:0001974; P:GO:0072012; P:GO:0014070; P:GO:0045766; P:GO:0050928; C:GO:0005886; C:GO:0005623; P:GO:0048014; P:GO:0007281; F:GO:0005172; P:GO:0050900; P:GO:0014823; P:GO:0016525	P:response to radiation; C:extracellular space; P:response to hypoxia; P:negative regulation of blood vessel endothelial cell migration; P:maternal process involved in female pregnancy; P:negative regulation of positive chemotaxis; P:hemopoiesis; P:blood vessel remodeling; P:negative regulation of cell-substrate adhesion; P:Tie signaling pathway; P:positive regulation of angiogenesis; P:glomerulu…	Extracellular	Soluble	SP(Sec/SPI)	0.680235
Res_001740-T1	Hemostasis impairing toxins	316	D8VNT0	Ryncolin-4	3.53e-46	54.0909	155.992	O70165	Ficolin-1 (Collagen/fibrinogen domain-containing protein 1) (Ficolin-A) (Ficolin-alpha) (M-ficolin)	1.2e-50	59.3458	173.711	XP_029205057	microfibril-associated glycoprotein 4-like	6.51882e-62	62.5	208.379	mesenchymal-epithelial cell signaling involved in prostate gland development	1.4e-50	206.8	0	16	P:GO:0060739; P:GO:0010628; P:GO:0030198; P:GO:0060740; P:GO:0007528; P:GO:0060447; F:GO:0001968; P:GO:0043687; P:GO:0014012; C:GO:0005623; C:GO:0005788; P:GO:0007162; P:GO:0008284; C:GO:0005614; F:GO:0045545; C:GO:0005604	P:prostate gland epithelium morphogenesis; C:interstitial matrix; P:mesenchymal-epithelial cell signaling involved in prostate gland development; C:basement membrane; C:endoplasmic reticulum lumen; P:negative regulation of cell adhesion; P:positive regulation of cell population proliferation; F:syndecan binding; P:bud outgrowth involved in lung branching; P:extracellular matrix organization; P:po…	Extracellular	Soluble	OTHER	0.489315
Res_001741-T1	Hemostasis impairing toxins	229	D8VNT0	Ryncolin-4	2.85e-44	54.9296	148.288	O70497	Ficolin-2 (Collagen/fibrinogen domain-containing protein 2) (Ficolin-B) (Ficolin-beta) (L-ficolin)	4.01e-52	58.1395	173.711	XP_028514372	ficolin-2 isoform X2	1.6633e-54	60	184.882	negative regulation of axon extension involved in regeneration	3e-45	188.7	0	20	C:GO:0072534; P:GO:0007158; P:GO:0007411; P:GO:0051971; P:GO:0030198; C:GO:0045121; P:GO:0008306; P:GO:0022029; P:GO:0050805; P:GO:0060291; C:GO:0009986; P:GO:0022408; P:GO:0050808; F:GO:0046625; C:GO:0005623; P:GO:0050885; P:GO:0035641; F:GO:0005178; P:GO:0048692; P:GO:0051968	C:perineuronal net; P:long-term synaptic potentiation; P:associative learning; C:membrane raft; F:integrin binding; F:sphingolipid binding; P:positive regulation of synaptic transmission, glutamatergic; P:extracellular matrix organization; P:negative regulation of cell-cell adhesion; C:cell surface; P:negative regulation of axon extension involved in regeneration; P:synapse organization; P:positi…	Extracellular	Soluble	OTHER	0.006616
Res_001961-T1	Other toxins	366	A7ISW2	Glutaminyl-peptide cyclotransferase (EC 2.3.2.5) (Glutaminyl cyclase) (QC) (Glutaminyl-tRNA cyclotransferase)	2.27e-91	63.5258	275.404	Q16769	Glutaminyl-peptide cyclotransferase (EC 2.3.2.5) (Glutaminyl cyclase) (QC) (sQC) (Glutaminyl-tRNA cyclotransferase) (Glutamyl cyclase) (EC)	1.28e-95	64.4172	291.967	XP_002158175	glutaminyl-peptide cyclotransferase-like	1.42032e-120	65.7459	362.844	glutaminyl-peptide cyclotransferase activity	2.6e-96	359	EC:2.3.2.5	9	F:GO:0016603; P:GO:0017186; F:GO:0004222; P:GO:0050829; C:GO:0005623; P:GO:0006508; C:GO:0005615; C:GO:0005739; P:GO:0051704	P:defense response to Gram-negative bacterium; P:peptidyl-pyroglutamic acid biosynthetic process, using glutaminyl-peptide cyclotransferase; C:extracellular space; C:mitochondrion; F:metalloendopeptidase activity; P:multi-organism process; C:obsolete cell; F:glutaminyl-peptide cyclotransferase activity; P:proteolysis	Endoplasmic reticulum	Soluble	SP(Sec/SPI)	0.587008
Res_002170-T1	Hemostasis impairing toxins	3028	C6JUN9	C-type lectin (CTL)	2e-22	52.9851	92.8189	Q9UBG0	C-type mannose receptor 2 (C-type lectin domain family 13 member E) (Endocytic receptor 180) (Macrophage mannose receptor 2) (Urokinase-type plasminogen activator receptor-associated protein) (UPAR-associated protein) (Urokinase receptor-associated protein) (CD antigen CD280)	7.2e-28	50.7634	128.257	XP_012553680	PREDICTED: uncharacterized protein LOC100203426 isoform X2	0	76.2813	2157.87	detection of mechanical stimulus	4.3e-269	936	EC:2.3.2.13	0	0	0	Cell membrane	Soluble	OTHER	0.002969
Res_002236-T1	Proteases	1115	Q7T1T4	Snake venom metalloproteinase BjussuMP-2 (SVMP) (EC 3.4.24.-) (BOJUMET I) (BjussuMP-II) (Nonhemorrhagic metalloprotease MP-II) (Fragment)	2.06e-14	47.2103	72.4034	Q8WXS8	A disintegrin and metalloproteinase with thrombospondin motifs 14 (ADAM-TS 14) (ADAM-TS14) (ADAMTS-14) (EC 3.4.24.-)	8.98e-55	48.8987	212.231	XP_012559396	A disintegrin and metalloproteinase with thrombospondin motifs 2-like isoform X1	2.53077e-130	51.8519	445.662	collagen catabolic process	2.9e-106	393.7	EC:3.4.24.14	14	P:GO:0030199; P:GO:0030574; F:GO:0004222; P:GO:1900748; P:GO:0043933; P:GO:0016485; C:GO:0031012; F:GO:0008270; P:GO:0043588; P:GO:0007283; C:GO:0005615; P:GO:0010573; P:GO:0030324; P:GO:0032964	P:collagen catabolic process; P:skin development; C:extracellular space; P:collagen fibril organization; P:protein-containing complex subunit organization; F:zinc ion binding; P:lung development; P:collagen biosynthetic process; F:metalloendopeptidase activity; P:positive regulation of vascular endothelial growth factor signaling pathway; P:vascular endothelial growth factor production; P:spermat…	Extracellular	Soluble	SP(Sec/SPI)	0.732482
Res_002339-T1	Hemostasis impairing toxins	1522	Q66S03	Galactose-specific lectin nattectin (CTL)	5.58e-17	47.7941	76.2554	Q5IS41	Neurocan core protein (Chondroitin sulfate proteoglycan 3)	7.35e-16	42.5532	87.4261	XP_012559742	nematocyst outer wall antigen precursor	0	62.1642	1149.42	peptidase inhibitor activity	2.8e-301	1042	EC:2.7.7.6; EC:3.4.21.43	0	0	0	Extracellular	Soluble	SP(Sec/SPI)	0.989265
Res_002340-T1	Hemostasis impairing toxins	1726	Q58L90	Venom prothrombin activator omicarin-C non-catalytic subunit (vPA) (Venom coagulation factor Va-like protein) [Cleaved into: Omicarin-C non-catalytic subunit heavy chain; Omicarin-C non-catalytic subunit light chain]	5.46e-35	47.6323	142.51	O43854	EGF-like repeat and discoidin I-like domain-containing protein 3 (Developmentally-regulated endothelial cell locus 1 protein) (Integrin-binding protein DEL1)	2.43e-34	45.5526	142.51	XP_012559271	PREDICTED: uncharacterized protein LOC100200237	0	65.3576	1418.29	biological adhesion	0	1564.7	0	0	0	0	Extracellular	Soluble	SP(Sec/SPI)	0.940775
Res_002483-T1	Hemostasis impairing toxins	679	A6MFK7	Venom prothrombin activator vestarin-D1 (vPA) (EC 3.4.21.6) (Venom coagulation factor Xa-like protease) [Cleaved into: Vestarin-D1 light chain; Vestarin-D1 heavy chain]	2.27e-11	53.75	62.3882	P49013	Fibropellin-3 (Epidermal growth factor-related protein 3) (Fibropellin III) (Fibropellin-c) (SpEGF III)	1.16e-59	56.9288	213.386	XP_032238748	fibropellin-1 isoform X41	2.53433e-70	57.7358	261.536	cell adhesion	1.7e-16	94.7	0	8	P:GO:0071526; F:GO:0005515; P:GO:1902667; P:GO:0033564; P:GO:0033563; C:GO:0005623; C:GO:0005887; F:GO:0017154	C:integral component of plasma membrane; P:semaphorin-plexin signaling pathway; P:regulation of axon guidance; F:semaphorin receptor activity; C:obsolete cell; F:protein binding; P:anterior/posterior axon guidance; P:dorsal/ventral axon guidance	Extracellular	Soluble	OTHER	0.003855
Res_002918-T1	Hemostasis impairing toxins	304	D8VNT0	Ryncolin-4	1.59e-41	56.9832	143.665	Q6AX44	Fibrinogen C domain-containing protein 1-A	3.98e-44	56.9378	159.073	XP_019855863	microfibril-associated glycoprotein 4-like	8.96231e-53	59.1549	184.496	mesenchymal-epithelial cell signaling involved in prostate gland development	4.2e-47	195.3	0	16	P:GO:0060739; P:GO:0010628; P:GO:0030198; P:GO:0060740; P:GO:0007528; P:GO:0060447; F:GO:0001968; P:GO:0043687; P:GO:0014012; C:GO:0005623; C:GO:0005788; P:GO:0007162; P:GO:0008284; C:GO:0005614; F:GO:0045545; C:GO:0005604	P:prostate gland epithelium morphogenesis; C:interstitial matrix; P:mesenchymal-epithelial cell signaling involved in prostate gland development; C:basement membrane; C:endoplasmic reticulum lumen; P:negative regulation of cell adhesion; P:positive regulation of cell population proliferation; F:syndecan binding; P:bud outgrowth involved in lung branching; P:extracellular matrix organization; P:po…	Extracellular	Soluble	SP(Sec/SPI)	0.912515
Res_002949-T1	Hemostasis impairing toxins	828	Q56EB0	Snaclec bothrojaracin subunit beta (BJC subunit beta)	1.28e-15	50	71.2478	P81282	Versican core protein (Chondroitin sulfate proteoglycan core protein 2) (Chondroitin sulfate proteoglycan 2) (Glial hyaluronate-binding protein) (GHAP) (Large fibroblast proteoglycan) (PG-M)	5.6e-19	52.6316	96.6709	XP_012563990	Brevican core protein	4.90164e-127	61.523	416.001	structural constituent of cell wall	1.1e-60	241.9	0	0	0	0	Extracellular	Soluble	SP(Sec/SPI)	0.974898
Res_003085-T1	Hemostasis impairing toxins	295	D8VNS7	Ryncolin-1	1.72e-23	46.1039	94.7449	Q9UQP3	Tenascin-N (TN-N) (Tenascin-W) (TN-W)	3.07e-27	50.5814	114.775	XP_027037254	Tenascin-N	1.5508e-29	40	124.79	Fibrinogen C	8e-27	127.9	0	2	C:GO:0016020; F:GO:0008061	F:chitin binding; C:membrane	Extracellular	Soluble	SP(Sec/SPI)	0.918317
Res_003101-T1	Hemostasis impairing toxins	329	A6MFK7	Venom prothrombin activator vestarin-D1 (vPA) (EC 3.4.21.6) (Venom coagulation factor Xa-like protease) [Cleaved into: Vestarin-D1 light chain; Vestarin-D1 heavy chain]	4.03e-35	45.7983	129.413	P14272	Plasma kallikrein (EC 3.4.21.34) (Fletcher factor) (Kininogenin) (Plasma prekallikrein) [Cleaved into: Plasma kallikrein heavy chain; Plasma kallikrein light chain]	3.21e-44	52.8958	163.31	XP_028391417	transmembrane protease serine 9-like	4.97538e-56	46.594	197.593	blood coagulation, intrinsic pathway	1.7e-41	176.8	EC:3.4.21.34	12	P:GO:0007597; F:GO:0042803; P:GO:0022617; C:GO:0005886; C:GO:0005623; P:GO:0051919; P:GO:0097421; P:GO:0031639; F:GO:0004252; C:GO:0005615; P:GO:0010430; P:GO:0002542	P:fatty acid omega-oxidation; F:protein homodimerization activity; P:positive regulation of fibrinolysis; C:extracellular space; P:extracellular matrix disassembly; F:serine-type endopeptidase activity; C:obsolete cell; P:plasminogen activation; P:Factor XII activation; P:liver regeneration; P:blood coagulation, intrinsic pathway; C:plasma membrane	Extracellular	Soluble	OTHER	0.002722
Res_003434-T1	Proteases	854	F8RKW0	Zinc metalloproteinase-disintegrin-like MTP8 (EC 3.4.24.-) (Snake venom metalloproteinase) (SVMP)	3.93e-100	49.584	320.857	Q61072	Disintegrin and metalloproteinase domain-containing protein 9 (ADAM 9) (EC 3.4.24.-) (Meltrin-gamma) (Metalloprotease/disintegrin/cysteine-rich protein 9) (Myeloma cell metalloproteinase)	1.49e-126	48.8067	403.675	KXJ15744	Disintegrin and metalloproteinase domain-containing protein 12	1.96354e-138	48.6736	444.121	Disintegrin and metalloproteinase domain-containing protein	2.5e-121	443.4	0	51	C:GO:0016021; P:GO:0007520; P:GO:1900121; P:GO:0051088; P:GO:0051044; P:GO:0042127; P:GO:0060317; F:GO:0005080; P:GO:0042246; F:GO:0008270; C:GO:0005654; P:GO:0030308; P:GO:0050714; P:GO:0051592; P:GO:0001890; F:GO:0004222; F:GO:0017124; F:GO:0005518; P:GO:0045766; C:GO:0031233; F:GO:0043236; P:GO:0022617; P:GO:0010042; P:GO:0071222; P:GO:0045087; P:GO:0051384; P:GO:0033631; P:GO:0033630; P:GO:00…	P:myoblast fusion; P:PMA-inducible membrane protein ectodomain proteolysis; P:response to glucocorticoid; P:negative regulation of cell growth; F:integrin binding; P:positive regulation of keratinocyte migration; P:cellular response to phorbol 13-acetate 12-myristate; P:positive regulation of macrophage fusion; P:negative regulation of cell-matrix adhesion; C:extracellular exosome; P:positive reg…	Cell membrane	Membrane	SP(Sec/SPI)	0.95632
Res_003493-T1	Proteases	458	C9WMM5	Venom serine carboxypeptidase (EC 3.4.16.5) (allergen Api m 9)	9.63e-46	47.981	161.77	Q920A5	Retinoid-inducible serine carboxypeptidase (EC 3.4.16.-) (Serine carboxypeptidase 1)	3.23e-148	66.2818	432.95	RMX55869	Retinoid-inducible serine carboxypeptidase	0	74.3649	551.592	serine-type carboxypeptidase activity	1.6e-138	499.6	0	7	P:GO:0045776; P:GO:0097755; P:GO:0042573; C:GO:0005623; F:GO:0004185; C:GO:0005829; P:GO:0051603	P:negative regulation of blood pressure; P:proteolysis involved in cellular protein catabolic process; P:retinoic acid metabolic process; C:obsolete cell; F:serine-type carboxypeptidase activity; P:positive regulation of blood vessel diameter; C:cytosol	Lysosome/Vacuole	Soluble	SP(Sec/SPI)	0.914939
Res_003500-T1	Proteases	740	Q76B45	Blarina toxin (BLTX) (EC 3.4.21.-)	9.97e-37	50.5376	135.961	P04813	Chymotrypsinogen 2 (EC 3.4.21.1) [Cleaved into: Chymotrypsin 2 chain A; Chymotrypsin 2 chain B; Chymotrypsin 2 chain C]	7.99e-51	56.3707	181.415	XP_020615462	chymotrypsinogen B-like	2.74813e-73	58.1169	250.366	serine-type endopeptidase activity	5e-54	219.5	EC:3.4.21.71	8	C:GO:0036457; P:GO:0070268; C:GO:0005623; F:GO:0004252; P:GO:0006508; C:GO:0005615; P:GO:0061436; C:GO:0005829	P:cornification; C:extracellular space; F:serine-type endopeptidase activity; C:obsolete cell; P:proteolysis; P:establishment of skin barrier; C:keratohyalin granule; C:cytosol	Extracellular	Soluble	OTHER	0.001781
Res_003501-T1	Proteases	426	Q76B45	Blarina toxin (BLTX) (EC 3.4.21.-)	2.46e-40	52.1898	142.124	Q9CQ52	Chymotrypsin-like elastase family member 3B (EC 3.4.21.70) (Elastase IIIB) (Elastase-3B) (Protease E)	1.73e-54	56.6929	184.882	XP_015768955	chymotrypsinogen B-like	3.23075e-68	64.0927	229.95	Trypsin-like serine protease	2.7e-52	213	EC:3.4.21.1	2	F:GO:0004252; P:GO:0006508	F:serine-type endopeptidase activity; P:proteolysis	Extracellular	Soluble	SP(Sec/SPI)	0.999058
Res_003619-T1	Hemostasis impairing toxins	573	D8VNT0	Ryncolin-4	6.63e-66	63.8889	214.927	O70497	Ficolin-2 (Collagen/fibrinogen domain-containing protein 2) (Ficolin-B) (Ficolin-beta) (L-ficolin)	4.54e-65	62.2807	218.009	KXJ21094	titin isoform X1	2.61503e-98	59.6059	323.939	cell surface pattern recognition receptor signaling pathway	1.2e-63	251.1	0	0	0	0	Extracellular	Soluble	OTHER	0.035379
Res_003635-T1	Phospholipases	162	P80003	Acidic phospholipase A2 PA4 (PLA2) (EC 3.1.1.4) (Phosphatidylcholine 2-acylhydrolase) [Cleaved into: Acidic phospholipase A2 PA2]	1.38e-32	66.3265	109.768	P80003	Acidic phospholipase A2 PA4 (PLA2) (EC 3.1.1.4) (Phosphatidylcholine 2-acylhydrolase) [Cleaved into: Acidic phospholipase A2 PA2]	3.27e-30	66.3265	109.768	AOT85611, AOT85613	protein PROCA1	1.55405e-56	75.3521	184.496	Phospholipase A2	3.5e-24	118.2	EC:3.1.1.4	0	0	0	Extracellular	Soluble	SP(Sec/SPI)	0.997374
Res_003847-T1	Hemostasis impairing toxins	3059	D2YVH7	C-type lectin mannose-binding isoform (CTL) (Venom C-type lectin mannose-binding isoform 1)	1.58e-14	44.0994	70.0922	Q09457	Cuticle collagen bli-1 (Blistered cuticle protein 1)	3.45e-17	48.227	92.8189	XP_012566124	C-type lectin domain family 4 member E-like	5.20301e-39	66.1111	173.711	hyaluronic acid binding	1.8e-17	100.1	0	33	P:GO:0030166; C:GO:0043202; F:GO:0005201; P:GO:0001502; P:GO:0007507; P:GO:0009629; P:GO:0001503; C:GO:0043005; P:GO:0009749; P:GO:0021510; C:GO:0043025; F:GO:0005509; P:GO:0043933; P:GO:0060591; C:GO:0005796; P:GO:0042340; C:GO:0005615; F:GO:0005540; P:GO:0010259; P:GO:0009612; C:GO:0072534; P:GO:0030199; P:GO:0010447; P:GO:0009314; P:GO:0002063; P:GO:0071363; P:GO:0006508; P:GO:0014070; P:GO:00…	P:response to radiation; C:extracellular space; P:spinal cord development; P:proteolysis; C:neuronal cell body; P:cartilage condensation; P:heart development; P:response to drug; P:response to mechanical stimulus; P:keratan sulfate catabolic process; P:keratan sulfate biosynthetic process; P:negative regulation of cell migration; C:basement membrane; C:perineuronal net; F:extracellular matrix str…	Nucleus	Soluble	OTHER	0.416594
Res_004249-T1	Hemostasis impairing toxins	584	D8VNS8	Ryncolin-2	6.85e-53	59.3301	180.644	Q29042	Ficolin-1 (Ficolin-A) (Ficolin-alpha)	1.32e-53	59.434	188.348	XP_015767635	fibrinogen alpha chain-like	1.75377e-90	50.8	317.39	mesenchymal-epithelial cell signaling involved in prostate gland development	9.8e-53	214.9	0	16	P:GO:0060739; P:GO:0010628; P:GO:0030198; P:GO:0060740; P:GO:0007528; P:GO:0060447; F:GO:0001968; P:GO:0043687; P:GO:0014012; C:GO:0005623; C:GO:0005788; P:GO:0007162; P:GO:0008284; C:GO:0005614; F:GO:0045545; C:GO:0005604	P:prostate gland epithelium morphogenesis; C:interstitial matrix; P:mesenchymal-epithelial cell signaling involved in prostate gland development; C:basement membrane; C:endoplasmic reticulum lumen; P:negative regulation of cell adhesion; P:positive regulation of cell population proliferation; F:syndecan binding; P:bud outgrowth involved in lung branching; P:extracellular matrix organization; P:po…	Extracellular	Soluble	OTHER	0.007722
Res_004510-T1	Hemostasis impairing toxins	481	Q90WI7	C-type lectin BfL-2 (CTL)	6.47e-15	48.9209	68.5514	Q61830	Macrophage mannose receptor 1 (MMR) (CD antigen CD206)	5.54e-20	42.807	97.0561	XP_028393076	macrophage mannose receptor 1-like	2.46774e-92	54.7297	298.516	carbohydrate binding	1.4e-73	283.9	0	0	0	0	Cell membrane	Membrane	SP(Sec/SPI)	0.995011
Res_004640-T1	Hemostasis impairing toxins	261	D8VNT0	Ryncolin-4	2.51e-42	56.422	144.436	Q92752	Tenascin-R (TN-R) (Janusin) (Restrictin)	1.76e-48	55.9091	174.866	XP_019853438	microfibril-associated glycoprotein 4-like	1.53884e-54	60.8295	186.808	mesenchymal-epithelial cell signaling involved in prostate gland development	1.2e-47	196.8	0	16	P:GO:0060739; P:GO:0010628; P:GO:0030198; P:GO:0060740; P:GO:0007528; P:GO:0060447; F:GO:0001968; P:GO:0043687; P:GO:0014012; C:GO:0005623; C:GO:0005788; P:GO:0007162; P:GO:0008284; C:GO:0005614; F:GO:0045545; C:GO:0005604	P:prostate gland epithelium morphogenesis; C:interstitial matrix; P:mesenchymal-epithelial cell signaling involved in prostate gland development; C:basement membrane; C:endoplasmic reticulum lumen; P:negative regulation of cell adhesion; P:positive regulation of cell population proliferation; F:syndecan binding; P:bud outgrowth involved in lung branching; P:extracellular matrix organization; P:po…	Extracellular	Soluble	OTHER	0.003753
Res_004641-T1	Hemostasis impairing toxins	319	D8VNS7	Ryncolin-1	1.56e-46	56.9507	157.147	Q95LU3	Fibrinogen C domain-containing protein 1	3.64e-50	60	175.252	KXJ18681	microfibril-associated glycoprotein 4-like	9.71404e-57	62.7273	203.371	mesenchymal-epithelial cell signaling involved in prostate gland development	2.1e-49	203	0	16	P:GO:0060739; P:GO:0010628; P:GO:0030198; P:GO:0060740; P:GO:0007528; P:GO:0060447; F:GO:0001968; P:GO:0043687; P:GO:0014012; C:GO:0005623; C:GO:0005788; P:GO:0007162; P:GO:0008284; C:GO:0005614; F:GO:0045545; C:GO:0005604	P:prostate gland epithelium morphogenesis; C:interstitial matrix; P:mesenchymal-epithelial cell signaling involved in prostate gland development; C:basement membrane; C:endoplasmic reticulum lumen; P:negative regulation of cell adhesion; P:positive regulation of cell population proliferation; F:syndecan binding; P:bud outgrowth involved in lung branching; P:extracellular matrix organization; P:po…	Extracellular	Soluble	SP(Sec/SPI)	0.967644
Res_004643-T1	Hemostasis impairing toxins	372	D8VNS8	Ryncolin-2	1.59e-43	55.4113	150.984	P22105	Tenascin-X (TN-X) (Hexabrachion-like protein)	1.36e-47	58.4071	176.792	XP_019853438	fibrinogen C domain-containing protein 1-like	1.33296e-59	61.7117	203.756	chitin binding	2e-51	209.9	0	2	C:GO:0016020; F:GO:0008061	F:chitin binding; C:membrane	Extracellular	Soluble	OTHER	0.00183
Res_004647-T1	Hemostasis impairing toxins	318	D8VNS8	Ryncolin-2	2.98e-42	56.8282	145.976	P22105	Tenascin-X (TN-X) (Hexabrachion-like protein)	4.74e-51	58.1498	184.882	XP_019853438	tenascin-X isoform X1	7.57495e-56	61.039	192.2	chitin binding	3e-48	199.1	0	2	C:GO:0016020; F:GO:0008061	F:chitin binding; C:membrane	Extracellular	Soluble	SP(Sec/SPI)	0.511952
Res_004663-T1	Hemostasis impairing toxins	306	D8VNS7	Ryncolin-1	6.56e-39	56.2212	136.732	Q8N539	Fibrinogen C domain-containing protein 1	3.34e-43	57.7778	156.762	XP_015760742	fibrinogen C domain-containing protein 1-like	2.63221e-51	56.4706	181.415	negative regulation of axon extension involved in regeneration	2e-44	186.4	0	20	C:GO:0072534; P:GO:0007158; P:GO:0007411; P:GO:0051971; P:GO:0030198; C:GO:0045121; P:GO:0008306; P:GO:0022029; P:GO:0050805; P:GO:0060291; C:GO:0009986; P:GO:0022408; P:GO:0050808; F:GO:0046625; C:GO:0005623; P:GO:0050885; P:GO:0035641; F:GO:0005178; P:GO:0048692; P:GO:0051968	C:perineuronal net; P:long-term synaptic potentiation; P:associative learning; C:membrane raft; F:integrin binding; F:sphingolipid binding; P:positive regulation of synaptic transmission, glutamatergic; P:extracellular matrix organization; P:negative regulation of cell-cell adhesion; C:cell surface; P:negative regulation of axon extension involved in regeneration; P:synapse organization; P:positi…	Extracellular	Soluble	OTHER	0.191168
Res_004663-T2	Hemostasis impairing toxins	306	D8VNT0	Ryncolin-4	9.97e-39	52.5346	136.346	Q8N539	Fibrinogen C domain-containing protein 1	5.8e-43	57.7778	156.377	XP_015760742	fibrinogen C domain-containing protein 1-like	1.08451e-50	56.4706	179.874	negative regulation of axon extension involved in regeneration	2.6e-44	186	0	20	C:GO:0072534; P:GO:0007158; P:GO:0007411; P:GO:0051971; P:GO:0030198; C:GO:0045121; P:GO:0008306; P:GO:0022029; P:GO:0050805; P:GO:0060291; C:GO:0009986; P:GO:0022408; P:GO:0050808; F:GO:0046625; C:GO:0005623; P:GO:0050885; P:GO:0035641; F:GO:0005178; P:GO:0048692; P:GO:0051968	C:perineuronal net; P:long-term synaptic potentiation; P:associative learning; C:membrane raft; F:integrin binding; F:sphingolipid binding; P:positive regulation of synaptic transmission, glutamatergic; P:extracellular matrix organization; P:negative regulation of cell-cell adhesion; C:cell surface; P:negative regulation of axon extension involved in regeneration; P:synapse organization; P:positi…	Extracellular	Soluble	OTHER	0.227584
Res_004663-T3	Hemostasis impairing toxins	306	D8VNS7	Ryncolin-1	7.99e-40	56.682	139.043	Q3SZZ7	Fibrinogen-like protein 1	1.73e-42	56.8966	151.369	XP_019853438	fibrinogen C domain-containing protein 1-like	4.88929e-51	59.1928	179.489	chitin binding	1e-45	190.7	0	2	C:GO:0016020; F:GO:0008061	F:chitin binding; C:membrane	Extracellular	Soluble	OTHER	0.22978
Res_004664-T1	Hemostasis impairing toxins	287	D8VNS7	Ryncolin-1	7.02e-42	56.1644	144.05	Q8N539	Fibrinogen C domain-containing protein 1	1.88e-48	59.5652	170.244	XP_019853438	fibrinogen C domain-containing protein 1-like	8.09926e-58	57.8125	196.052	chitin binding	6.5e-50	204.5	0	2	C:GO:0016020; F:GO:0008061	F:chitin binding; C:membrane	Extracellular	Soluble	OTHER	0.000362
Res_004665-T1	Hemostasis impairing toxins	316	D8VNS8	Ryncolin-2	1.53e-37	51.0549	133.265	Q95LU3	Fibrinogen C domain-containing protein 1	8.5e-41	47.8395	150.214	XP_019853438	microfibril-associated glycoprotein 4-like	8.69558e-47	51.8797	168.703	mesenchymal-epithelial cell signaling involved in prostate gland development	1.6e-41	176.8	0	16	P:GO:0060739; P:GO:0010628; P:GO:0030198; P:GO:0060740; P:GO:0007528; P:GO:0060447; F:GO:0001968; P:GO:0043687; P:GO:0014012; C:GO:0005623; C:GO:0005788; P:GO:0007162; P:GO:0008284; C:GO:0005614; F:GO:0045545; C:GO:0005604	P:prostate gland epithelium morphogenesis; C:interstitial matrix; P:mesenchymal-epithelial cell signaling involved in prostate gland development; C:basement membrane; C:endoplasmic reticulum lumen; P:negative regulation of cell adhesion; P:positive regulation of cell population proliferation; F:syndecan binding; P:bud outgrowth involved in lung branching; P:extracellular matrix organization; P:po…	Extracellular	Soluble	OTHER	0.388644
Res_005068-T1	Hemostasis impairing toxins	482	Q58L91	Venom prothrombin activator oscutarin-C non-catalytic subunit (vPA) (Venom coagulation factor Va-like protein) [Cleaved into: Oscutarin-C non-catalytic subunit heavy chain; Oscutarin-C non-catalytic subunit light chain]	6.52e-20	56.7901	89.3521	Q62371	Discoidin domain-containing receptor 2 (Discoidin domain receptor 2) (EC 2.7.10.1) (CD167 antigen-like family member B) (Neurotrophic tyrosine kinase, receptor-related 3) (Receptor protein-tyrosine kinase TKT) (Tyrosine-protein kinase TYRO10) (CD antigen CD167b)	1.38e-33	44.837	138.272	XP_012556428	discoidin domain-containing receptor 2-like	2.18024e-85	56.1927	279.641	protein tyrosine kinase collagen receptor activity	6.6e-47	195.3	EC:2.7.10.1	44	P:GO:0007566; P:GO:0061302; P:GO:0090091; P:GO:0043933; P:GO:0038063; P:GO:0008285; P:GO:0048146; C:GO:0005912; C:GO:0016324; C:GO:0005737; C:GO:0016323; P:GO:0048680; P:GO:0030500; P:GO:0030199; P:GO:0060749; C:GO:0043235; F:GO:0070492; F:GO:0005515; P:GO:0014909; P:GO:0031100; P:GO:0008045; F:GO:0038062; P:GO:0001952; P:GO:0097376; P:GO:0060444; P:GO:0003416; P:GO:0001558; P:GO:1990138; F:GO:00…	F:protein tyrosine kinase collagen receptor activity; P:negative regulation of cell population proliferation; P:regulation of cell growth; P:collagen-activated tyrosine kinase receptor signaling pathway; C:cytoplasm; P:smooth muscle cell-matrix adhesion; P:regulation of bone mineralization; P:chondrocyte proliferation; F:oligosaccharide binding; P:mammary gland alveolus development; P:neuron proj…	Cell membrane	Membrane	SP(Sec/SPI)	0.667695
Res_005083-T1	Hemostasis impairing toxins	591	D8VNS8	Ryncolin-2	2.19e-73	70.5069	235.343	D8VNS8	Ryncolin-2	5.19e-71	70.5069	235.343	XP_028512828	titin isoform X1	2.52481e-96	58.3535	318.546	cell surface pattern recognition receptor signaling pathway	8.1e-63	248.4	0	0	0	0	Extracellular	Soluble	OTHER	0.003288
Res_005216-T1	Neurotoxin	988	Q25338	Delta-latroinsectotoxin-Lt1a (Delta-LIT-Lt1a) (Delta-latroinsectotoxin) (Delta-LIT)	1.16e-16	43.956	81.2629	Q80SY4	E3 ubiquitin-protein ligase MIB1 (EC 2.3.2.27) (DAPK-interacting protein 1) (DIP-1) (Mind bomb homolog 1) (RING-type E3 ubiquitin transferase MIB1)	4.51e-130	47.9426	421.394	XP_028406301	E3 ubiquitin-protein ligase MIB1 isoform X2	2.22463e-135	45.4545	442.58	Mindbomb E3 ubiquitin protein ligase 2	3e-78	300.4	EC:2.3.2.27	13	P:GO:0007520; F:GO:0032038; P:GO:0046716; C:GO:0000151; F:GO:0032033; P:GO:0000209; C:GO:0031430; F:GO:0061630; F:GO:0008270; C:GO:0005623; C:GO:0030018; C:GO:0005769; C:GO:0005829	P:myoblast fusion; C:early endosome; F:myosin II light chain binding; F:zinc ion binding; P:muscle cell cellular homeostasis; C:Z disc; C:cytosol; F:myosin II heavy chain binding; C:M band; P:protein polyubiquitination; C:obsolete cell; C:ubiquitin ligase complex; F:ubiquitin protein ligase activity	Cytoplasm	Soluble	OTHER	0.004401
Res_005353-T1	Hemostasis impairing toxins	1306	Q7SZN0	Venom prothrombin activator pseutarin-C non-catalytic subunit (PCNS) (vPA) (Venom coagulation factor Va-like protein) [Cleaved into: Pseutarin-C non-catalytic subunit heavy chain; Pseutarin-C non-catalytic subunit light chain]	3.04e-37	45.2153	149.058	P22897	Macrophage mannose receptor 1 (MMR) (C-type lectin domain family 13 member D) (C-type lectin domain family 13 member D-like) (Human mannose receptor) (hMR) (Macrophage mannose receptor 1-like protein 1) (CD antigen CD206)	2.91e-86	50.597	312.768	XP_012562856	macrophage mannose receptor 1-like	0	55.3354	867.84	carbohydrate binding	1.4e-208	733.8	0	14	F:GO:0004888; F:GO:0005537; P:GO:0007165; P:GO:0071353; F:GO:0038024; P:GO:0006898; C:GO:0009986; C:GO:0010008; P:GO:0071346; P:GO:0071222; C:GO:0005623; C:GO:0005887; P:GO:0098657; P:GO:0051704	C:integral component of plasma membrane; C:endosome membrane; P:signal transduction; P:import into cell; F:transmembrane signaling receptor activity; P:receptor-mediated endocytosis; P:cellular response to lipopolysaccharide; P:cellular response to interleukin-4; F:cargo receptor activity; P:cellular response to interferon-gamma; F:mannose binding; C:cell surface; P:multi-organism process; C:obso…	Cell membrane	Membrane	OTHER	0.005285
Res_005354-T1	Hemostasis impairing toxins	1412	A7X3Z7	C-type lectin lectoxin-Lio2 (CTL)	3.1e-21	53.0769	88.5817	Q9UBG0	C-type mannose receptor 2 (C-type lectin domain family 13 member E) (Endocytic receptor 180) (Macrophage mannose receptor 2) (Urokinase-type plasminogen activator receptor-associated protein) (UPAR-associated protein) (Urokinase receptor-associated protein) (CD antigen CD280)	1.77e-42	45.6674	174.096	XP_028515638	predicted protein	0	52.4752	863.988	carbohydrate binding	4.4e-248	865.1	0	14	F:GO:0004888; F:GO:0005537; P:GO:0007165; P:GO:0071353; F:GO:0038024; P:GO:0006898; C:GO:0009986; C:GO:0010008; P:GO:0071346; P:GO:0071222; C:GO:0005623; C:GO:0005887; P:GO:0098657; P:GO:0051704	C:integral component of plasma membrane; C:endosome membrane; P:signal transduction; P:import into cell; F:transmembrane signaling receptor activity; P:receptor-mediated endocytosis; P:cellular response to lipopolysaccharide; P:cellular response to interleukin-4; F:cargo receptor activity; P:cellular response to interferon-gamma; F:mannose binding; C:cell surface; P:multi-organism process; C:obso…	Extracellular	Soluble	OTHER	0.000908
Res_005454-T1	Neurotoxin	296	Q9XZC0	Alpha-latrocrustotoxin-Lt1a (Alpha-LCT-Lt1a) (Alpha-latrocrustotoxin) (Alpha-LCT) (Crusta1) (Fragment)	2.11e-13	55.8824	66.6254	Q6DGX3	Ankyrin repeat domain-containing protein 54	2.84e-40	60.3175	145.591	XP_002166244	ankyrin repeat domain-containing protein 54	3.44381e-45	65.4639	164.081	ankyrin repeat	2.1e-11	76.6	0	10	C:GO:0030496; F:GO:0019887; C:GO:0005623; C:GO:0005634; P:GO:1902531; F:GO:0044877; P:GO:0006913; C:GO:0005737; P:GO:0045859; P:GO:0045648	P:regulation of protein kinase activity; F:protein-containing complex binding; C:midbody; F:protein kinase regulator activity; C:obsolete cell; P:positive regulation of erythrocyte differentiation; C:cytoplasm; C:nucleus; P:nucleocytoplasmic transport; P:regulation of intracellular signal transduction	Cytoplasm	Soluble	OTHER	0.000969
Res_005532-T1	Hemostasis impairing toxins	387	D8VNS7	Ryncolin-1	1.16e-36	50.6173	132.88	Q00546	Tenascin-R (TN-R) (Restrictin)	1.33e-37	56.8421	147.902	XP_027046952	microfibril-associated glycoprotein 4-like	8.16938e-42	48.7374	160.999	Fibrinogen-related domains (FReDs)	1.4e-34	154.1	0	0	0	0	Extracellular	Soluble	SP(Sec/SPI)	0.651475
Res_005722-T1	Cysteine-rich Proteins	367	Q3SB07	Cysteine-rich venom protein pseudechetoxin-like (CRVP)	2.69e-18	47.9167	79.337	Q9CYL5	Golgi-associated plant pathogenesis-related protein 1 (GAPR-1) (Golgi-associated PR-1 protein) (Glioma pathogenesis-related protein 2) (GliPR 2)	3e-39	68.0556	139.813	XP_015774412, XP_015774413, XP_015774414, XP_015774415	cell wall protein PRY3-like	1.67098e-123	69.8225	369.007	positive regulation of epithelial to mesenchymal transition	9.7e-99	367.1	0	7	P:GO:0010634; C:GO:0000139; F:GO:0042803; C:GO:0098791; P:GO:0010718; C:GO:0005623; P:GO:0070374	C:Golgi apparatus subcompartment; F:protein homodimerization activity; P:positive regulation of epithelial to mesenchymal transition; C:obsolete cell; P:positive regulation of ERK1 and ERK2 cascade; C:Golgi membrane; P:positive regulation of epithelial cell migration	Extracellular	Soluble	OTHER	0.002748
Res_005722-T2	Cysteine-rich Proteins	331	Q3SB07	Cysteine-rich venom protein pseudechetoxin-like (CRVP)	1.34e-18	47.9167	80.1073	Q9CYL5	Golgi-associated plant pathogenesis-related protein 1 (GAPR-1) (Golgi-associated PR-1 protein) (Glioma pathogenesis-related protein 2) (GliPR 2)	1.4e-39	68.0556	139.813	XP_015774412, XP_015774413, XP_015774414, XP_015774415	cell wall protein PRY3-like	3.98569e-124	69.8225	369.392	positive regulation of epithelial to mesenchymal transition	8.8e-99	367.1	0	7	P:GO:0010634; C:GO:0000139; F:GO:0042803; C:GO:0098791; P:GO:0010718; C:GO:0005623; P:GO:0070374	C:Golgi apparatus subcompartment; F:protein homodimerization activity; P:positive regulation of epithelial to mesenchymal transition; C:obsolete cell; P:positive regulation of ERK1 and ERK2 cascade; C:Golgi membrane; P:positive regulation of epithelial cell migration	Cell membrane	Soluble	OTHER	0.000728
Res_005722-T3	Cysteine-rich Proteins	335	Q3SB07	Cysteine-rich venom protein pseudechetoxin-like (CRVP)	1.46e-18	47.9167	79.7221	Q9CYL5	Golgi-associated plant pathogenesis-related protein 1 (GAPR-1) (Golgi-associated PR-1 protein) (Glioma pathogenesis-related protein 2) (GliPR 2)	4.66e-40	68.0272	140.969	XP_015774412, XP_015774413, XP_015774414, XP_015774415	cell wall protein PRY3-like	2.50945e-124	69.8225	370.163	positive regulation of epithelial to mesenchymal transition	8.9e-99	367.1	0	7	P:GO:0010634; C:GO:0000139; F:GO:0042803; C:GO:0098791; P:GO:0010718; C:GO:0005623; P:GO:0070374	C:Golgi apparatus subcompartment; F:protein homodimerization activity; P:positive regulation of epithelial to mesenchymal transition; C:obsolete cell; P:positive regulation of ERK1 and ERK2 cascade; C:Golgi membrane; P:positive regulation of epithelial cell migration	Cell membrane	Membrane	OTHER	0.000461
Res_005728-T1	Hemostasis impairing toxins	2027	Q593B6	Coagulation factor V [Cleaved into: Coagulation factor V heavy chain; Coagulation factor V light chain]	1.67e-18	51.2195	88.9669	O97827	Adhesion G protein-coupled receptor L3 (Latrophilin-3)	3.13e-30	41.4815	135.191	XP_027048284	Brain-specific angiogenesis inhibitor 3	0	44.9634	639.032	Immunoglobulin C-2 Type	1.5e-201	711.1	0	0	0	0	Cell membrane	Membrane	SP(Sec/SPI)	0.99322
Res_005735-T1	Hemostasis impairing toxins	313	D8VNS8	Ryncolin-2	2.79e-39	51.8987	137.887	Q00546	Tenascin-R (TN-R) (Restrictin)	4.98e-41	54.4681	155.606	XP_011407438	fibrinogen C domain-containing protein 1-like	3.81749e-48	55.5085	172.555	mesenchymal-epithelial cell signaling involved in prostate gland development	2e-44	186.4	0	16	P:GO:0060739; P:GO:0010628; P:GO:0030198; P:GO:0060740; P:GO:0007528; P:GO:0060447; F:GO:0001968; P:GO:0043687; P:GO:0014012; C:GO:0005623; C:GO:0005788; P:GO:0007162; P:GO:0008284; C:GO:0005614; F:GO:0045545; C:GO:0005604	P:prostate gland epithelium morphogenesis; C:interstitial matrix; P:mesenchymal-epithelial cell signaling involved in prostate gland development; C:basement membrane; C:endoplasmic reticulum lumen; P:negative regulation of cell adhesion; P:positive regulation of cell population proliferation; F:syndecan binding; P:bud outgrowth involved in lung branching; P:extracellular matrix organization; P:po…	Extracellular	Soluble	OTHER	0.003009
Res_005838-T1	Hemostasis impairing toxins	563	Q58L91	Venom prothrombin activator oscutarin-C non-catalytic subunit (vPA) (Venom coagulation factor Va-like protein) [Cleaved into: Oscutarin-C non-catalytic subunit heavy chain; Oscutarin-C non-catalytic subunit light chain]	5.83e-13	50	68.1662	Q62371	Discoidin domain-containing receptor 2 (Discoidin domain receptor 2) (EC 2.7.10.1) (CD167 antigen-like family member B) (Neurotrophic tyrosine kinase, receptor-related 3) (Receptor protein-tyrosine kinase TKT) (Tyrosine-protein kinase TYRO10) (CD antigen CD167b)	1.18e-28	43.0108	124.79	XP_012556428	discoidin domain-containing receptor 2-like	4.34105e-71	57.8797	244.973	protein tyrosine kinase collagen receptor activity	1.4e-35	157.9	EC:2.7.10.1	44	P:GO:0007566; P:GO:0061302; P:GO:0090091; P:GO:0043933; P:GO:0038063; P:GO:0008285; P:GO:0048146; C:GO:0005912; C:GO:0016324; C:GO:0005737; C:GO:0016323; P:GO:0048680; P:GO:0030500; P:GO:0030199; P:GO:0060749; C:GO:0043235; F:GO:0070492; F:GO:0005515; P:GO:0014909; P:GO:0031100; P:GO:0008045; F:GO:0038062; P:GO:0001952; P:GO:0097376; P:GO:0060444; P:GO:0003416; P:GO:0001558; P:GO:1990138; F:GO:00…	F:protein tyrosine kinase collagen receptor activity; P:negative regulation of cell population proliferation; P:regulation of cell growth; P:collagen-activated tyrosine kinase receptor signaling pathway; C:cytoplasm; P:smooth muscle cell-matrix adhesion; P:regulation of bone mineralization; P:chondrocyte proliferation; F:oligosaccharide binding; P:mammary gland alveolus development; P:neuron proj…	Cell membrane	Membrane	SP(Sec/SPI)	0.976967
Res_005838-T2	Hemostasis impairing toxins	579	Q58L91	Venom prothrombin activator oscutarin-C non-catalytic subunit (vPA) (Venom coagulation factor Va-like protein) [Cleaved into: Oscutarin-C non-catalytic subunit heavy chain; Oscutarin-C non-catalytic subunit light chain]	6e-13	50	68.1662	Q62371	Discoidin domain-containing receptor 2 (Discoidin domain receptor 2) (EC 2.7.10.1) (CD167 antigen-like family member B) (Neurotrophic tyrosine kinase, receptor-related 3) (Receptor protein-tyrosine kinase TKT) (Tyrosine-protein kinase TYRO10) (CD antigen CD167b)	1.49e-28	43.0108	124.405	XP_012556428	discoidin domain-containing receptor 2-like	5.03701e-71	57.8797	245.358	protein tyrosine kinase collagen receptor activity	1.4e-35	157.9	EC:2.7.10.1	44	P:GO:0007566; P:GO:0061302; P:GO:0090091; P:GO:0043933; P:GO:0038063; P:GO:0008285; P:GO:0048146; C:GO:0005912; C:GO:0016324; C:GO:0005737; C:GO:0016323; P:GO:0048680; P:GO:0030500; P:GO:0030199; P:GO:0060749; C:GO:0043235; F:GO:0070492; F:GO:0005515; P:GO:0014909; P:GO:0031100; P:GO:0008045; F:GO:0038062; P:GO:0001952; P:GO:0097376; P:GO:0060444; P:GO:0003416; P:GO:0001558; P:GO:1990138; F:GO:00…	F:protein tyrosine kinase collagen receptor activity; P:negative regulation of cell population proliferation; P:regulation of cell growth; P:collagen-activated tyrosine kinase receptor signaling pathway; C:cytoplasm; P:smooth muscle cell-matrix adhesion; P:regulation of bone mineralization; P:chondrocyte proliferation; F:oligosaccharide binding; P:mammary gland alveolus development; P:neuron proj…	Cell membrane	Membrane	OTHER	0.277187
Res_005903-T1	Hemostasis impairing toxins	339	D8VNS7	Ryncolin-1	3.05e-51	60.6742	170.244	Q29042	Ficolin-1 (Ficolin-A) (Ficolin-alpha)	2.97e-51	60.4651	175.637	XP_013400765	microfibril-associated glycoprotein 4-like	8.10145e-56	61.5385	194.512	Tenascin XB	1.5e-45	190.3	0	0	0	0	Extracellular	Soluble	OTHER	0.000209
Res_006152-T1	Neurotoxin	171	Q25338	Delta-latroinsectotoxin-Lt1a (Delta-LIT-Lt1a) (Delta-latroinsectotoxin) (Delta-LIT)	3.43e-17	55.9322	74.3294	Q0P5B9	Ankyrin repeat domain-containing protein 39	8.59e-45	64.9682	148.673	XP_019643901	Ankyrin repeat domain-containing protein 39	1.30664e-53	72.1212	177.948	Ankyrin repeat	3.8e-21	108.2	0	0	0	0	Cytoplasm	Soluble	OTHER	0.001546
Res_006181-T1	Hemostasis impairing toxins	1105	Q58L90	Venom prothrombin activator omicarin-C non-catalytic subunit (vPA) (Venom coagulation factor Va-like protein) [Cleaved into: Omicarin-C non-catalytic subunit heavy chain; Omicarin-C non-catalytic subunit light chain]	2.7e-128	54.7401	422.935	B3EWZ9	Hephaestin-like protein (EC 1.-.-.-)	0	65.3285	1103.58	B3EWZ9	hephaestin-like protein	0	65.3285	1103.58	oxidoreductase activity, oxidizing metal ions, oxygen as acceptor	1.9e-283	982.2	EC:1.16.3.1	20	P:GO:0055114; P:GO:0007584; F:GO:0004322; C:GO:0046658; P:GO:0006826; P:GO:0006879; F:GO:0005507; P:GO:0007568; F:GO:0051087; P:GO:0046688; P:GO:0043687; P:GO:0001889; C:GO:0048471; C:GO:0005623; C:GO:0005788; P:GO:0015679; C:GO:0005615; C:GO:0016323; F:GO:0008198; P:GO:0030324	P:aging; C:anchored component of plasma membrane; P:iron ion transport; C:endoplasmic reticulum lumen; P:liver development; F:ferrous iron binding; C:extracellular space; P:oxidation-reduction process; P:plasma membrane copper ion transport; C:perinuclear region of cytoplasm; F:chaperone binding; P:lung development; F:copper ion binding; C:basolateral plasma membrane; F:ferroxidase activity; P:po…	Extracellular	Soluble	SP(Sec/SPI)	0.972103
Res_006182-T1	Hemostasis impairing toxins	1180	Q593B6	Coagulation factor V [Cleaved into: Coagulation factor V heavy chain; Coagulation factor V light chain]	6.35e-126	53.1205	418.313	B3EWZ9	Hephaestin-like protein (EC 1.-.-.-)	0	63.1434	1003.43	XP_020906986	hephaestin-like protein	0	66.1682	1060.44	oxidoreductase activity, oxidizing metal ions, oxygen as acceptor	2e-291	1008.8	EC:1.16.3.1	2	P:GO:0055114; F:GO:0004322	P:oxidation-reduction process; F:ferroxidase activity	Extracellular	Soluble	SP(Sec/SPI)	0.996801
Res_006291-T1	Proteases	2032	Q2UXQ5	Zinc metalloproteinase-disintegrin-like EoVMP2 (EC 3.4.24.-) (Haemorrhagic 56 kDa metalloproteinase) (Snake venom metalloproteinase) (SVMP) (Zinc metalloproteinase-disintegrin-like Eoc22)	1.05e-62	46.8872	223.402	Q13443	Disintegrin and metalloproteinase domain-containing protein 9 (ADAM 9) (EC 3.4.24.-) (Cellular disintegrin-related protein) (Meltrin-gamma) (Metalloprotease/disintegrin/cysteine-rich protein 9) (Myeloma cell metalloproteinase)	5.85e-61	49.4071	229.565	XP_032229700	Disintegrin and metalloproteinase domain-containing protein 9	0	57.9611	1435.62	metalloendopeptidase activity	0	1241.1	0	12	C:GO:0009897; C:GO:0030424; F:GO:0008237; C:GO:0005623; C:GO:0005887; P:GO:0007283; P:GO:0006508; F:GO:0005178; P:GO:0007339; P:GO:0060468; C:GO:1990913; C:GO:0043025	C:integral component of plasma membrane; C:neuronal cell body; P:binding of sperm to zona pellucida; C:external side of plasma membrane; C:sperm head plasma membrane; F:metallopeptidase activity; C:obsolete cell; P:proteolysis; F:integrin binding; P:prevention of polyspermy; P:spermatogenesis; C:axon	Extracellular	Soluble	SP(Sec/SPI)	0.798554
Res_006292-T1	Proteases	791	Q9PVK7	Zinc metalloproteinase-disintegrin-like cobrin (EC 3.4.24.-) (Snake venom metalloproteinase) (SVMP)	4.52e-80	46.5944	265.388	Q13443	Disintegrin and metalloproteinase domain-containing protein 9 (ADAM 9) (EC 3.4.24.-) (Cellular disintegrin-related protein) (Meltrin-gamma) (Metalloprotease/disintegrin/cysteine-rich protein 9) (Myeloma cell metalloproteinase)	2.1e-85	47.482	291.582	XP_022783093	zinc metalloproteinase-disintegrin-like VMP-III	1.98728e-154	55.4348	501.13	metalloendopeptidase activity	1.8e-102	380.6	0	12	C:GO:0009897; C:GO:0030424; F:GO:0008237; C:GO:0005623; C:GO:0005887; P:GO:0007283; P:GO:0006508; F:GO:0005178; P:GO:0007339; P:GO:0060468; C:GO:1990913; C:GO:0043025	C:integral component of plasma membrane; C:neuronal cell body; P:binding of sperm to zona pellucida; C:external side of plasma membrane; C:sperm head plasma membrane; F:metallopeptidase activity; C:obsolete cell; P:proteolysis; F:integrin binding; P:prevention of polyspermy; P:spermatogenesis; C:axon	Cell membrane	Membrane	SP(Sec/SPI)	0.993754
Res_006294-T1	Proteases	2037	Q2UXQ5	Zinc metalloproteinase-disintegrin-like EoVMP2 (EC 3.4.24.-) (Haemorrhagic 56 kDa metalloproteinase) (Snake venom metalloproteinase) (SVMP) (Zinc metalloproteinase-disintegrin-like Eoc22)	4.54e-69	48.7572	241.891	Q2UXQ5	Zinc metalloproteinase-disintegrin-like EoVMP2 (EC 3.4.24.-) (Haemorrhagic 56 kDa metalloproteinase) (Snake venom metalloproteinase) (SVMP) (Zinc metalloproteinase-disintegrin-like Eoc22)	1.07e-66	48.7572	241.891	XP_020905912, XP_028516343	Disintegrin and metalloproteinase domain-containing protein 9	0	59.7548	1476.46	metalloendopeptidase activity	0	1269.2	0	12	C:GO:0009897; C:GO:0030424; F:GO:0008237; C:GO:0005623; C:GO:0005887; P:GO:0007283; P:GO:0006508; F:GO:0005178; P:GO:0007339; P:GO:0060468; C:GO:1990913; C:GO:0043025	C:integral component of plasma membrane; C:neuronal cell body; P:binding of sperm to zona pellucida; C:external side of plasma membrane; C:sperm head plasma membrane; F:metallopeptidase activity; C:obsolete cell; P:proteolysis; F:integrin binding; P:prevention of polyspermy; P:spermatogenesis; C:axon	Extracellular	Soluble	SP(Sec/SPI)	0.988166
Res_006537-T1	Hemostasis impairing toxins	263	D8VNT0	Ryncolin-4	1.69e-41	56.9948	142.124	Q9WTS8	Ficolin-1 (Collagen/fibrinogen domain-containing protein 1) (Ficolin-A) (Ficolin-alpha) (M-ficolin)	1.83e-40	53.8813	145.591	XP_020897244	microfibril-associated glycoprotein 4-like	2.19305e-46	55.0459	166.392	negative regulation of axon extension involved in regeneration	3.5e-42	178.7	0	20	C:GO:0072534; P:GO:0007158; P:GO:0007411; P:GO:0051971; P:GO:0030198; C:GO:0045121; P:GO:0008306; P:GO:0022029; P:GO:0050805; P:GO:0060291; C:GO:0009986; P:GO:0022408; P:GO:0050808; F:GO:0046625; C:GO:0005623; P:GO:0050885; P:GO:0035641; F:GO:0005178; P:GO:0048692; P:GO:0051968	C:perineuronal net; P:long-term synaptic potentiation; P:associative learning; C:membrane raft; F:integrin binding; F:sphingolipid binding; P:positive regulation of synaptic transmission, glutamatergic; P:extracellular matrix organization; P:negative regulation of cell-cell adhesion; C:cell surface; P:negative regulation of axon extension involved in regeneration; P:synapse organization; P:positi…	Extracellular	Soluble	OTHER	0.002047
Res_006537-T2	Hemostasis impairing toxins	322	D8VNT0	Ryncolin-4	1.65e-43	58.0311	149.443	Q9WTS8	Ficolin-1 (Collagen/fibrinogen domain-containing protein 1) (Ficolin-A) (Ficolin-alpha) (M-ficolin)	7.27e-42	54.3379	150.984	XP_020897244	microfibril-associated glycoprotein 4-like	7.27964e-48	55.0459	172.17	negative regulation of axon extension involved in regeneration	7.3e-42	177.9	0	20	C:GO:0072534; P:GO:0007158; P:GO:0007411; P:GO:0051971; P:GO:0030198; C:GO:0045121; P:GO:0008306; P:GO:0022029; P:GO:0050805; P:GO:0060291; C:GO:0009986; P:GO:0022408; P:GO:0050808; F:GO:0046625; C:GO:0005623; P:GO:0050885; P:GO:0035641; F:GO:0005178; P:GO:0048692; P:GO:0051968	C:perineuronal net; P:long-term synaptic potentiation; P:associative learning; C:membrane raft; F:integrin binding; F:sphingolipid binding; P:positive regulation of synaptic transmission, glutamatergic; P:extracellular matrix organization; P:negative regulation of cell-cell adhesion; C:cell surface; P:negative regulation of axon extension involved in regeneration; P:synapse organization; P:positi…	Extracellular	Soluble	SP(Sec/SPI)	0.657016
Res_006538-T1	Hemostasis impairing toxins	322	D8VNT0	Ryncolin-4	1.27e-41	56.9948	144.436	O70165	Ficolin-1 (Collagen/fibrinogen domain-containing protein 1) (Ficolin-A) (Ficolin-alpha) (M-ficolin)	8.77e-40	54.2986	145.591	KFB49728	microfibril-associated glycoprotein 4-like	1.43989e-44	56.9444	166.777	chitin binding	1.7e-38	166.8	0	2	C:GO:0016020; F:GO:0008061	F:chitin binding; C:membrane	Extracellular	Soluble	SP(Sec/SPI)	0.659288
Res_006539-T1	Hemostasis impairing toxins	348	D8VNT0	Ryncolin-4	5.24e-41	58.3333	143.28	Q9WTS8	Ficolin-1 (Collagen/fibrinogen domain-containing protein 1) (Ficolin-A) (Ficolin-alpha) (M-ficolin)	1.98e-42	55.7078	153.295	XP_029211140	microfibril-associated glycoprotein 4-like	2.32457e-43	58.2569	163.696	negative regulation of axon extension involved in regeneration	7.4e-40	171.4	0	20	C:GO:0072534; P:GO:0007158; P:GO:0007411; P:GO:0051971; P:GO:0030198; C:GO:0045121; P:GO:0008306; P:GO:0022029; P:GO:0050805; P:GO:0060291; C:GO:0009986; P:GO:0022408; P:GO:0050808; F:GO:0046625; C:GO:0005623; P:GO:0050885; P:GO:0035641; F:GO:0005178; P:GO:0048692; P:GO:0051968	C:perineuronal net; P:long-term synaptic potentiation; P:associative learning; C:membrane raft; F:integrin binding; F:sphingolipid binding; P:positive regulation of synaptic transmission, glutamatergic; P:extracellular matrix organization; P:negative regulation of cell-cell adhesion; C:cell surface; P:negative regulation of axon extension involved in regeneration; P:synapse organization; P:positi…	Cell membrane	Membrane	OTHER	0.006486
Res_006760-T1	Hemostasis impairing toxins	419	D8VNT0	Ryncolin-4	1.11e-58	61.6114	191.815	D8VNT0	Ryncolin-4	2.62e-56	61.6114	191.815	XP_031558870, AOW69398	ficolin-like protein 1	1.15356e-89	57.7128	290.812	mesenchymal-epithelial cell signaling involved in prostate gland development	2e-60	240	0	16	P:GO:0060739; P:GO:0010628; P:GO:0030198; P:GO:0060740; P:GO:0007528; P:GO:0060447; F:GO:0001968; P:GO:0043687; P:GO:0014012; C:GO:0005623; C:GO:0005788; P:GO:0007162; P:GO:0008284; C:GO:0005614; F:GO:0045545; C:GO:0005604	P:prostate gland epithelium morphogenesis; C:interstitial matrix; P:mesenchymal-epithelial cell signaling involved in prostate gland development; C:basement membrane; C:endoplasmic reticulum lumen; P:negative regulation of cell adhesion; P:positive regulation of cell population proliferation; F:syndecan binding; P:bud outgrowth involved in lung branching; P:extracellular matrix organization; P:po…	Extracellular	Soluble	SP(Sec/SPI)	0.985135
Res_006767-T1	Hemostasis impairing toxins	314	D8VNT0	Ryncolin-4	1.19e-40	52.5822	141.354	Q5I2E5	Ficolin-2 (Collagen/fibrinogen domain-containing protein 2) (Ficolin-B) (Ficolin-beta) (L-ficolin)	4.39e-42	53.7736	150.984	XP_019853308	microfibril-associated glycoprotein 4-like	5.67389e-47	56.1086	169.088	negative regulation of axon extension involved in regeneration	4.2e-42	178.7	0	20	C:GO:0072534; P:GO:0007158; P:GO:0007411; P:GO:0051971; P:GO:0030198; C:GO:0045121; P:GO:0008306; P:GO:0022029; P:GO:0050805; P:GO:0060291; C:GO:0009986; P:GO:0022408; P:GO:0050808; F:GO:0046625; C:GO:0005623; P:GO:0050885; P:GO:0035641; F:GO:0005178; P:GO:0048692; P:GO:0051968	C:perineuronal net; P:long-term synaptic potentiation; P:associative learning; C:membrane raft; F:integrin binding; F:sphingolipid binding; P:positive regulation of synaptic transmission, glutamatergic; P:extracellular matrix organization; P:negative regulation of cell-cell adhesion; C:cell surface; P:negative regulation of axon extension involved in regeneration; P:synapse organization; P:positi…	Extracellular	Soluble	SP(Sec/SPI)	0.505961
Res_007188-T1	Other toxins	365	Q75WF2	Plancitoxin-1 (EC 3.1.22.1) (Plancitoxin I) (Plan-I) [Cleaved into: Plancitoxin-1 subunit alpha; Plancitoxin-1 subunit beta]	7.93e-73	53.2033	227.254	O00115	Deoxyribonuclease-2-alpha (EC 3.1.22.1) (Acid DNase) (Deoxyribonuclease II alpha) (DNase II alpha) (Lysosomal DNase II) (R31240_2)	4.91e-72	52.8249	231.491	XP_028405784	plancitoxin-1 isoform X3	4.97388e-93	59.116	292.352	deoxyribonuclease II activity	6.1e-77	294.7	EC:3.1.22.1	6	P:GO:0045476; F:GO:0004531; C:GO:0005764; C:GO:0005623; C:GO:0005634; P:GO:0006309	P:nurse cell apoptotic process; C:obsolete cell; P:apoptotic DNA fragmentation; C:nucleus; F:deoxyribonuclease II activity; C:lysosome	Extracellular	Soluble	SP(Sec/SPI)	0.996115
Res_007335-T1	Protease Inhibitors	301	Q02989	Alpha-latroinsectotoxin-Lt1a (Alpha-LIT-Lt1a) (Alpha-latroinsectotoxin) (Alpha-LIT) (Fragment)	2.59e-20	46.1255	87.4261	O54910	NF-kappa-B inhibitor epsilon (NF-kappa-BIE) (I-kappa-B-epsilon) (IkB-E) (IkB-epsilon) (IkappaBepsilon)	4.62e-37	54.6256	138.272	XP_031566534	B-cell lymphoma 3 protein homolog	2.28413e-45	55.8594	168.318	nucleotide-binding oligomerization domain containing 1 signaling pathway	7.9e-30	137.9	0	47	F:GO:0008139; P:GO:0097421; P:GO:0034142; P:GO:0045638; P:GO:0007249; F:GO:0031072; P:GO:0046843; P:GO:0043330; P:GO:0002758; F:GO:0044877; C:GO:0005634; P:GO:0043392; P:GO:0048145; P:GO:0008063; P:GO:0035994; P:GO:0010875; P:GO:0070427; P:GO:0016579; F:GO:0051059; P:GO:0010745; P:GO:0010888; P:GO:0007399; F:GO:0031625; P:GO:0031663; P:GO:1901222; P:GO:0009950; P:GO:0007253; P:GO:0032495; P:GO:00…	P:innate immune response-activating signal transduction; P:tumor necrosis factor-mediated signaling pathway; P:nucleotide-binding oligomerization domain containing 2 signaling pathway; P:interleukin-1-mediated signaling pathway; P:negative regulation of lipid storage; F:heat shock protein binding; P:negative regulation of Notch signaling pathway; C:cytosol; P:regulation of NIK/NF-kappaB signaling…	Nucleus	Soluble	OTHER	0.000625
Res_007393-T1	Other toxins	225	M5B4R7	Translationally-controlled tumor protein homolog (GTx-TCTP1)	2.19e-29	56.8182	104.76	Q60FS1	Translationally-controlled tumor protein homolog (TCTP)	4.58e-35	60.9195	125.561	XP_017856263	translationally-controlled tumor protein homolog	1.67622e-34	62.5	130.954	positive regulation of histone phosphorylation	2.1e-27	129.4	0	16	P:GO:0006302; P:GO:2000736; P:GO:0031573; F:GO:0008017; P:GO:0065009; P:GO:0071480; F:GO:0005509; P:GO:0040018; P:GO:0045793; C:GO:0005623; C:GO:0005634; C:GO:0005700; P:GO:0007095; C:GO:0005737; F:GO:0005085; P:GO:0033129	F:guanyl-nucleotide exchange factor activity; P:mitotic G2 DNA damage checkpoint; P:regulation of molecular function; C:cytoplasm; P:double-strand break repair; P:intra-S DNA damage checkpoint; C:polytene chromosome; P:positive regulation of histone phosphorylation; F:calcium ion binding; P:regulation of stem cell differentiation; C:obsolete cell; P:positive regulation of cell size; C:nucleus; P:…	Cytoplasm	Soluble	OTHER	0.000826
Res_007547-T1	Protease Inhibitors	1453	P0C8W3	Kunitz-type serine protease inhibitor Hg1 (Delta-KTx 1.1)	3.75e-15	68.5185	68.5514	Q868Z9	Papilin	4.47e-14	55.102	81.6481	NP_001267819, AAO60428	cysteine-rich motor neuron 1 protein-like isoform X2	2.75822e-52	49.0566	214.157	von Willebrand factor type C domain	2.4e-108	401	0	0	0	0	Extracellular	Soluble	SP(Sec/SPI)	0.998204
Res_007645-T1	Hemostasis impairing toxins	315	D8VNT0	Ryncolin-4	1.81e-38	53.9535	135.961	O70165	Ficolin-1 (Collagen/fibrinogen domain-containing protein 1) (Ficolin-A) (Ficolin-alpha) (M-ficolin)	2.48e-45	57.0815	159.844	XP_028408748	microfibril-associated glycoprotein 4-like	1.87526e-48	62.5698	171.785	mesenchymal-epithelial cell signaling involved in prostate gland development	1e-43	184.1	0	16	P:GO:0060739; P:GO:0010628; P:GO:0030198; P:GO:0060740; P:GO:0007528; P:GO:0060447; F:GO:0001968; P:GO:0043687; P:GO:0014012; C:GO:0005623; C:GO:0005788; P:GO:0007162; P:GO:0008284; C:GO:0005614; F:GO:0045545; C:GO:0005604	P:prostate gland epithelium morphogenesis; C:interstitial matrix; P:mesenchymal-epithelial cell signaling involved in prostate gland development; C:basement membrane; C:endoplasmic reticulum lumen; P:negative regulation of cell adhesion; P:positive regulation of cell population proliferation; F:syndecan binding; P:bud outgrowth involved in lung branching; P:extracellular matrix organization; P:po…	Extracellular	Soluble	SP(Sec/SPI)	0.972613
Res_007688-T1	Neurotoxin	1244	Q25338	Delta-latroinsectotoxin-Lt1a (Delta-LIT-Lt1a) (Delta-latroinsectotoxin) (Delta-LIT)	1.33e-13	54.2857	71.633	Q8CGN4	BCL-6 corepressor (BCoR)	4.69e-43	53.6082	176.022	XP_020621610	BCL-6 corepressor	2.01362e-83	51.7483	310.842	BCL6 corepressor	2.4e-08	68.6	0	17	P:GO:0035518; P:GO:0048190; P:GO:0051572; F:GO:0000977; P:GO:0000122; P:GO:0007507; F:GO:0042826; P:GO:0070171; F:GO:0003714; P:GO:0065001; F:GO:0031072; P:GO:0000415; P:GO:0060021; C:GO:0005623; C:GO:0005634; F:GO:0008134; P:GO:0030502	F:histone deacetylase binding; P:wing disc dorsal/ventral pattern formation; F:heat shock protein binding; P:negative regulation of transcription by RNA polymerase II; P:negative regulation of histone H3-K4 methylation; P:negative regulation of histone H3-K36 methylation; P:roof of mouth development; F:transcription factor binding; P:negative regulation of bone mineralization; F:transcription cor…	Nucleus	Soluble	OTHER	0.000849
Res_007809-T1	Hemostasis impairing toxins	271	D8VNS7	Ryncolin-1	1.65e-47	60.221	158.303	Q29116	Tenascin (TN) (Cytotactin) (GMEM) (GP 150-225) (Glioma-associated-extracellular matrix antigen) (Hexabrachion) (JI) (Myotendinous antigen) (Neuronectin) (P230) (Tenascin-C) (TN-C)	1.82e-49	57.7982	178.333	XP_029180552	microfibril-associated glycoprotein 4-like	6.23034e-56	62.5592	194.126	mesenchymal-epithelial cell signaling involved in prostate gland development	2.2e-47	196.1	0	16	P:GO:0060739; P:GO:0010628; P:GO:0030198; P:GO:0060740; P:GO:0007528; P:GO:0060447; F:GO:0001968; P:GO:0043687; P:GO:0014012; C:GO:0005623; C:GO:0005788; P:GO:0007162; P:GO:0008284; C:GO:0005614; F:GO:0045545; C:GO:0005604	P:prostate gland epithelium morphogenesis; C:interstitial matrix; P:mesenchymal-epithelial cell signaling involved in prostate gland development; C:basement membrane; C:endoplasmic reticulum lumen; P:negative regulation of cell adhesion; P:positive regulation of cell population proliferation; F:syndecan binding; P:bud outgrowth involved in lung branching; P:extracellular matrix organization; P:po…	Extracellular	Soluble	OTHER	0.001856
Res_008003-T1	Cysteine-rich Proteins	381	Q2XXQ4	Cysteine-rich venom protein DIS3 (CRVP) (Cysteine-rich secretory protein DIS3) (CRISP-DIS3)	2.22e-13	44.9275	65.4698	Q9CYL5	Golgi-associated plant pathogenesis-related protein 1 (GAPR-1) (Golgi-associated PR-1 protein) (Glioma pathogenesis-related protein 2) (GliPR 2)	1.72e-14	54.3103	73.559	XP_029214256	Golgi-associated plant pathogenesis-related protein 1-like	4.67403e-48	67.2515	186.422	Belongs to the CRISP family	1.3e-16	94.4	0	0	0	0	Cytoplasm	Soluble	OTHER	0.003284
Res_008162-T1	Proteases	678	P84033	U21-ctenitoxin-Pn1a (U21-CNTX-Pn1a) (EC 3.4.21.-) (Proteinase PN47)	5.01e-29	46.2121	112.464	Q8VIF2	Serine protease 42 (EC 3.4.21.-) (Testis serine protease 2)	1.33e-36	51.1111	143.28	XP_027059336	pancreatic secretory granule membrane major glycoprotein GP2-like	3.29629e-40	50.9225	159.458	serine-type endopeptidase activity	3.6e-38	166.8	EC:3.4.21.4; EC:3.4.21.34	0	0	0	Cell membrane	Soluble	SP(Sec/SPI)	0.864719
Res_008211-T1	Hemostasis impairing toxins	1396	A6MFK7	Venom prothrombin activator vestarin-D1 (vPA) (EC 3.4.21.6) (Venom coagulation factor Xa-like protease) [Cleaved into: Vestarin-D1 light chain; Vestarin-D1 heavy chain]	5.95e-43	56.6667	160.614	Q8CHN8	Mannan-binding lectin serine protease 1 (EC 3.4.21.-) (Complement factor MASP-3) (Complement-activating component of Ra-reactive factor) (Mannose-binding lectin-associated serine protease 1) (MASP-1) (Mannose-binding protein-associated serine protease) (Ra-reactive factor serine protease p100) (RaRF) (Serine protease 5) [Cleaved into: Mannan-binding lectin serine protease 1 heavy chain; Mannan-bi…	1.69e-52	50	201.06	XP_031563420	low-density lipoprotein receptor-related protein 4-like	0	51.2821	822.002	cell adhesion	2.6e-67	264.6	0	0	0	0	Extracellular	Soluble	SP(Sec/SPI)	0.979331
Res_008211-T2	Hemostasis impairing toxins	429	A6MFK7	Venom prothrombin activator vestarin-D1 (vPA) (EC 3.4.21.6) (Venom coagulation factor Xa-like protease) [Cleaved into: Vestarin-D1 light chain; Vestarin-D1 heavy chain]	2.82e-45	56.6667	159.844	Q8CHN8	Mannan-binding lectin serine protease 1 (EC 3.4.21.-) (Complement factor MASP-3) (Complement-activating component of Ra-reactive factor) (Mannose-binding lectin-associated serine protease 1) (MASP-1) (Mannose-binding protein-associated serine protease) (Ra-reactive factor serine protease p100) (RaRF) (Serine protease 5) [Cleaved into: Mannan-binding lectin serine protease 1 heavy chain; Mannan-bi…	3.25e-56	50.1217	200.29	XP_031563420	CUB and sushi domain-containing protein 1	4.13146e-100	59.0909	336.65	complement component C4b binding	4.2e-53	215.7	EC:3.4.21.104	16	P:GO:0010955; F:GO:0001855; P:GO:0045916; P:GO:0002673; F:GO:0005509; P:GO:0006898; F:GO:0042803; P:GO:0001867; C:GO:0005654; C:GO:0005623; P:GO:0098657; F:GO:0004252; F:GO:0048306; C:GO:0005615; C:GO:0005829; P:GO:2000258	P:complement activation, lectin pathway; F:protein homodimerization activity; C:extracellular space; P:import into cell; P:receptor-mediated endocytosis; P:negative regulation of complement activation; F:complement component C4b binding; C:cytosol; P:regulation of acute inflammatory response; F:calcium ion binding; P:negative regulation of protein activation cascade; F:serine-type endopeptidase a…	Extracellular	Soluble	SP(Sec/SPI)	0.998703
Res_008336-T1	Hemostasis impairing toxins	347	P82807	Venom prothrombin activator notecarin-D1 (vPA) (EC 3.4.21.6) (Venom coagulation factor Xa-like protease) [Cleaved into: Notecarin-D1 light chain; Notecarin-D1 heavy chain]	3.38e-11	39.3822	60.077	Q402U7	Serine protease 44 (EC 3.4.21.-) (Testis serine protease 4) (TESSP-4) (Testis-specific serine protease 4)	2.14e-14	48.8263	76.6406	XP_009637791	vitamin K-dependent protein C	3.10068e-16	46.281	90.8929	protein C (inactivator of coagulation factors Va and VIIIa)	1.7e-15	90.5	EC:3.4.21.69	16	P:GO:0030195; P:GO:0006508; P:GO:0044537; P:GO:0006888; F:GO:0070012; P:GO:0050728; P:GO:0043687; C:GO:0005796; P:GO:0001889; P:GO:0043066; F:GO:0043621; C:GO:0005623; C:GO:0005788; F:GO:0004252; P:GO:1903142; C:GO:0005615	P:positive regulation of establishment of endothelial barrier; F:oligopeptidase activity; C:endoplasmic reticulum lumen; P:liver development; C:extracellular space; C:Golgi lumen; F:protein self-association; P:proteolysis; P:negative regulation of inflammatory response; P:endoplasmic reticulum to Golgi vesicle-mediated transport; P:negative regulation of blood coagulation; F:serine-type endopepti…	Extracellular	Soluble	SP(Sec/SPI)	0.825063
Res_008336-T2	Hemostasis impairing toxins	283	P82807	Venom prothrombin activator notecarin-D1 (vPA) (EC 3.4.21.6) (Venom coagulation factor Xa-like protease) [Cleaved into: Notecarin-D1 light chain; Notecarin-D1 heavy chain]	9.75e-12	39.3822	60.8474	Q402U7	Serine protease 44 (EC 3.4.21.-) (Testis serine protease 4) (TESSP-4) (Testis-specific serine protease 4)	1.6e-14	48.8263	75.8702	XP_010304624	vitamin K-dependent protein C	1.22165e-16	46.281	90.5077	protein C (inactivator of coagulation factors Va and VIIIa)	1.4e-15	90.5	EC:3.4.21.69	16	P:GO:0030195; P:GO:0006508; P:GO:0044537; P:GO:0006888; F:GO:0070012; P:GO:0050728; P:GO:0043687; C:GO:0005796; P:GO:0001889; P:GO:0043066; F:GO:0043621; C:GO:0005623; C:GO:0005788; F:GO:0004252; P:GO:1903142; C:GO:0005615	P:positive regulation of establishment of endothelial barrier; F:oligopeptidase activity; C:endoplasmic reticulum lumen; P:liver development; C:extracellular space; C:Golgi lumen; F:protein self-association; P:proteolysis; P:negative regulation of inflammatory response; P:endoplasmic reticulum to Golgi vesicle-mediated transport; P:negative regulation of blood coagulation; F:serine-type endopepti…	Extracellular	Soluble	OTHER	0.000298
Res_008386-T1	Hemostasis impairing toxins	392	D8VNS7	Ryncolin-1	2.15e-38	51.9149	137.502	Q9R045	Angiopoietin-related protein 2 (Angiopoietin-like protein 2)	5.93e-41	60.1064	154.066	XP_019855865	fibrinogen-like protein 1	3.08018e-49	57.6923	178.333	negative regulation of axon extension involved in regeneration	1.4e-42	180.6	0	20	C:GO:0072534; P:GO:0007158; P:GO:0007411; P:GO:0051971; P:GO:0030198; C:GO:0045121; P:GO:0008306; P:GO:0022029; P:GO:0050805; P:GO:0060291; C:GO:0009986; P:GO:0022408; P:GO:0050808; F:GO:0046625; C:GO:0005623; P:GO:0050885; P:GO:0035641; F:GO:0005178; P:GO:0048692; P:GO:0051968	C:perineuronal net; P:long-term synaptic potentiation; P:associative learning; C:membrane raft; F:integrin binding; F:sphingolipid binding; P:positive regulation of synaptic transmission, glutamatergic; P:extracellular matrix organization; P:negative regulation of cell-cell adhesion; C:cell surface; P:negative regulation of axon extension involved in regeneration; P:synapse organization; P:positi…	Extracellular	Soluble	OTHER	0.136422
Res_008399-T1	Hemostasis impairing toxins	574	D8VNS8	Ryncolin-2	1.43e-58	61.3208	195.667	O70165	Ficolin-1 (Collagen/fibrinogen domain-containing protein 1) (Ficolin-A) (Ficolin-alpha) (M-ficolin)	1.22e-62	62.4434	212.231	XP_015767635	titin isoform X1	6.3157e-91	51.7172	318.161	chitin binding	5.6e-61	242.3	0	2	C:GO:0016020; F:GO:0008061	F:chitin binding; C:membrane	Extracellular	Soluble	OTHER	0.191209
Res_008407-T1	Proteases	300	Q8AY79	Beta-fibrinogenase stejnefibrase-2 (EC 3.4.21.-) (Snake venom serine protease) (SVSP)	5.25e-15	39.5189	69.707	O46644	Chymotrypsin-like elastase family member 1 (EC 3.4.21.36) (Elastase-1)	1.04e-20	45.5446	92.4337	GBM25490	chymotrypsin-like elastase family member 1	4.53497e-20	46.3918	98.2117	serine-type endopeptidase activity	1.4e-18	100.5	0	0	0	0	Extracellular	Soluble	SP(Sec/SPI)	0.92725
Res_008407-T2	Proteases	300	Q8AY79	Beta-fibrinogenase stejnefibrase-2 (EC 3.4.21.-) (Snake venom serine protease) (SVSP)	5.25e-15	39.5189	69.707	O46644	Chymotrypsin-like elastase family member 1 (EC 3.4.21.36) (Elastase-1)	1.04e-20	45.5446	92.4337	GBM25490	chymotrypsin-like elastase family member 1	4.53497e-20	46.3918	98.2117	serine-type endopeptidase activity	1.4e-18	100.5	0	0	0	0	Extracellular	Soluble	SP(Sec/SPI)	0.92725
Res_008491-T1	Hemostasis impairing toxins	586	D8VNT0	Ryncolin-4	8.81e-65	63.1579	212.616	Q95LU3	Fibrinogen C domain-containing protein 1	1.23e-67	63.4043	228.794	KXJ18681	Fibrinogen C domain-containing protein 1	6.01677e-97	58.5608	317.775	complement activation, lectin pathway	2.3e-62	246.9	0	0	0	0	Extracellular	Soluble	OTHER	0.005855
Res_008626-T1	Other toxins	777	P81383	L-amino-acid oxidase (LAO) (Oh-LAAO) (EC 1.4.3.2)	8.91e-12	72.7273	64.3142	O60341	Lysine-specific histone demethylase 1A (EC 1.14.99.66) (BRAF35-HDAC complex protein BHC110) (Flavin-containing amine oxidase domain-containing protein 2) ([histone H3]-dimethyl-L-lysine(4) FAD-dependent demethylase 1A)	0	75.4967	937.562	XP_029205193	lysine-specific histone demethylase 1A-like isoform X1	0	79.1395	1019.22	demethylase 1A	1.8e-259	902.1	0	13	P:GO:0051054; C:GO:0017053; F:GO:0005515; P:GO:0034720; P:GO:0007474; F:GO:0034648; C:GO:0005623; C:GO:0005634; P:GO:0048477; P:GO:0008593; P:GO:0031937; C:GO:0005737; P:GO:0090309	P:histone H3-K4 demethylation; P:positive regulation of chromatin silencing; C:cytoplasm; P:positive regulation of DNA methylation-dependent heterochromatin assembly; P:imaginal disc-derived wing vein specification; F:histone demethylase activity (H3-dimethyl-K4 specific); C:obsolete cell; F:protein binding; C:transcription repressor complex; P:regulation of Notch signaling pathway; P:positive re…	Nucleus	Soluble	OTHER	0.000648
Res_008701-T1	Hemostasis impairing toxins	633	Q58L91	Venom prothrombin activator oscutarin-C non-catalytic subunit (vPA) (Venom coagulation factor Va-like protein) [Cleaved into: Oscutarin-C non-catalytic subunit heavy chain; Oscutarin-C non-catalytic subunit light chain]	8.79e-37	52.9595	144.05	O35474	EGF-like repeat and discoidin I-like domain-containing protein 3 (Developmentally-regulated endothelial cell locus 1 protein) (Integrin-binding protein DEL1)	1.03e-40	50.4478	157.918	XP_027051554	predicted protein	1.01104e-145	57.1429	447.203	phosphatidylethanolamine binding	6.1e-109	401.7	0	0	0	0	Extracellular	Soluble	SP(Sec/SPI)	0.961101
Res_008701-T2	Hemostasis impairing toxins	633	Q58L91	Venom prothrombin activator oscutarin-C non-catalytic subunit (vPA) (Venom coagulation factor Va-like protein) [Cleaved into: Oscutarin-C non-catalytic subunit heavy chain; Oscutarin-C non-catalytic subunit light chain]	8.79e-37	52.9595	144.05	O35474	EGF-like repeat and discoidin I-like domain-containing protein 3 (Developmentally-regulated endothelial cell locus 1 protein) (Integrin-binding protein DEL1)	1.03e-40	50.4478	157.918	XP_027051554	predicted protein	1.01104e-145	57.1429	447.203	phosphatidylethanolamine binding	6.1e-109	401.7	0	0	0	0	Extracellular	Soluble	SP(Sec/SPI)	0.961101
Res_009063-T1	Protease Inhibitors	584	P0DN11	U-actitoxin-Avd3j (U-AITX-Avd3j) (AsKC7)	6.41e-14	62.7451	63.5438	P0DN11	U-actitoxin-Avd3j (U-AITX-Avd3j) (AsKC7)	1.52e-11	62.7451	63.5438	XP_031574004	predicted protein	2.81526e-54	58.2375	203.756	calcium ion binding	6e-50	205.7	0	0	0	0	Extracellular	Soluble	SP(Sec/SPI)	0.984336
Res_009487-T1	Hemostasis impairing toxins	543	D8VNS6	C-type lectin (CTL)	1.02e-16	52.6316	73.9442	A1KZ92	Peroxidasin-like protein (EC 1.11.1.7) (Cardiac peroxidase) (Vascular peroxidase 2) (polysomal ribonuclease 1) (PRM1)	1.54e-14	47.1795	80.4925	KXJ22614	Fibrinogen C domain-containing protein 1	4.04473e-28	47.1631	128.642	C-type lectin (CTL) or carbohydrate-recognition domain (CRD)	8.1e-17	95.5	0	0	0	0	Extracellular	Soluble	OTHER	0.004271
Res_009782-T1	Proteases	800	W4VS99	Neprilysin-1 (EC 3.4.24.-)	1.19e-123	51.9424	384.8	Q8IS64	Endothelin-converting enzyme homolog (ECE) (EC 3.4.24.-)	5.81e-165	57.3276	498.049	XP_019637513	endothelin-converting enzyme 1 isoform X2	3.83455e-169	59.3886	518.464	Peptidase family M13	1e-137	497.7	EC:3.4.24.71	3	C:GO:0016021; P:GO:0016486; F:GO:0008237	F:metallopeptidase activity; C:integral component of membrane; P:peptide hormone processing	Cytoplasm	Soluble	OTHER	0.006489
Res_009981-T1	Hemostasis impairing toxins	468	A6MFK7	Venom prothrombin activator vestarin-D1 (vPA) (EC 3.4.21.6) (Venom coagulation factor Xa-like protease) [Cleaved into: Vestarin-D1 light chain; Vestarin-D1 heavy chain]	2.47e-12	47.7064	64.6994	P10079	Fibropellin-1 (Epidermal growth factor-related protein 1) (Fibropellin-I) (SpEGF I) (UEGF-1)	8.11e-24	64.2857	108.612	XP_022808833	neurogenic locus notch homolog protein 1-like	5.82291e-96	64.0483	323.939	Fibulin 7	4.4e-11	76.3	0	0	0	0	Extracellular	Soluble	SP(Sec/SPI)	0.924795
Res_010103-T1	Hemostasis impairing toxins	311	D8VNS8	Ryncolin-2	2.22e-35	48.1982	127.487	P19477	Fibrinogen-like protein A (FREP-A)	6.45e-43	54.4681	151.754	XP_019853308	fibrinogen C domain-containing protein 1-like	2.77287e-48	55.5556	172.555	negative regulation of axon extension involved in regeneration	4.4e-44	185.3	0	20	C:GO:0072534; P:GO:0007158; P:GO:0007411; P:GO:0051971; P:GO:0030198; C:GO:0045121; P:GO:0008306; P:GO:0022029; P:GO:0050805; P:GO:0060291; C:GO:0009986; P:GO:0022408; P:GO:0050808; F:GO:0046625; C:GO:0005623; P:GO:0050885; P:GO:0035641; F:GO:0005178; P:GO:0048692; P:GO:0051968	C:perineuronal net; P:long-term synaptic potentiation; P:associative learning; C:membrane raft; F:integrin binding; F:sphingolipid binding; P:positive regulation of synaptic transmission, glutamatergic; P:extracellular matrix organization; P:negative regulation of cell-cell adhesion; C:cell surface; P:negative regulation of axon extension involved in regeneration; P:synapse organization; P:positi…	Extracellular	Soluble	SP(Sec/SPI)	0.732306
Res_010104-T1	Hemostasis impairing toxins	311	D8VNS8	Ryncolin-2	5.93e-39	49.7758	137.117	Q9WTS8	Ficolin-1 (Collagen/fibrinogen domain-containing protein 1) (Ficolin-A) (Ficolin-alpha) (M-ficolin)	2.05e-47	56.872	165.236	XP_019853307	tenascin-like isoform X2	8.92296e-55	57.0815	189.504	negative regulation of axon extension involved in regeneration	2.1e-49	203	0	20	C:GO:0072534; P:GO:0007158; P:GO:0007411; P:GO:0051971; P:GO:0030198; C:GO:0045121; P:GO:0008306; P:GO:0022029; P:GO:0050805; P:GO:0060291; C:GO:0009986; P:GO:0022408; P:GO:0050808; F:GO:0046625; C:GO:0005623; P:GO:0050885; P:GO:0035641; F:GO:0005178; P:GO:0048692; P:GO:0051968	C:perineuronal net; P:long-term synaptic potentiation; P:associative learning; C:membrane raft; F:integrin binding; F:sphingolipid binding; P:positive regulation of synaptic transmission, glutamatergic; P:extracellular matrix organization; P:negative regulation of cell-cell adhesion; C:cell surface; P:negative regulation of axon extension involved in regeneration; P:synapse organization; P:positi…	Extracellular	Soluble	SP(Sec/SPI)	0.703697
Res_010109-T1	Hemostasis impairing toxins	311	D8VNS7	Ryncolin-1	3.3e-36	53.3333	129.798	P19477	Fibrinogen-like protein A (FREP-A)	3.55e-43	53.2189	152.525	XP_019859837	fibrinogen C domain-containing protein 1-like	2.43066e-48	54.0084	172.555	chitin binding	5.8e-44	184.9	0	2	C:GO:0016020; F:GO:0008061	F:chitin binding; C:membrane	Extracellular	Soluble	SP(Sec/SPI)	0.772926
Res_010162-T1	Other toxins	146	Q8AY75	Calglandulin	4.31e-21	54.4218	80.1073	Q2QX45	Calcium-dependent protein kinase 28 (OsCDPK28) (OsCPK28) (EC 2.7.11.1)	1.21e-25	60.8392	103.99	XP_019634885, XP_019634886	putative calmodulin	3.38405e-30	65.5172	116.316	EF hand	0.17	42.7	0	0	0	0	Cytoplasm	Soluble	OTHER	0.000281
Res_010195-T1	Other toxins	631	A3QVN9	Hyaluronidase-1 (Hy-1) (EC 3.2.1.35) (Hyaluronoglucosaminidase-1) (Venom spreading factor)	6.9e-74	53.6082	240.736	Q12794	Hyaluronidase-1 (Hyal-1) (EC 3.2.1.35) (Hyaluronoglucosaminidase-1) (Lung carcinoma protein 1) (LuCa-1)	1.48e-85	58.2278	277.33	XP_020621927	hyaluronidase-1-like isoform X1	1.63173e-146	57.7922	448.358	positive regulation of hyaluranon cable assembly	9.1e-113	414.5	EC:3.2.1.35	3	C:GO:0005576; P:GO:0030207; F:GO:0015929	C:extracellular region; P:chondroitin sulfate catabolic process; F:hexosaminidase activity	Cell membrane	Membrane	SP(Sec/SPI)	0.970346
Res_010195-T2	Other toxins	631	A3QVN9	Hyaluronidase-1 (Hy-1) (EC 3.2.1.35) (Hyaluronoglucosaminidase-1) (Venom spreading factor)	6.9e-74	53.6082	240.736	Q12794	Hyaluronidase-1 (Hyal-1) (EC 3.2.1.35) (Hyaluronoglucosaminidase-1) (Lung carcinoma protein 1) (LuCa-1)	1.48e-85	58.2278	277.33	XP_020621927	hyaluronidase-1-like isoform X1	1.63173e-146	57.7922	448.358	positive regulation of hyaluranon cable assembly	9.1e-113	414.5	EC:3.2.1.35	3	C:GO:0005576; P:GO:0030207; F:GO:0015929	C:extracellular region; P:chondroitin sulfate catabolic process; F:hexosaminidase activity	Cell membrane	Membrane	SP(Sec/SPI)	0.970346
Res_010210-T1	Proteases	330	K7Z9Q9	Nematocyst expressed protein 6 (NEP-6) (EC 3.4.24.-) (Astacin-like metalloprotease toxin)	2.18e-34	48.3607	124.02	Q9U3S9	Zinc metalloproteinase nas-6 (EC 3.4.24.-) (Nematode astacin 6)	3.09e-38	53.7445	141.739	XP_032228385	zinc metalloproteinase nas-15-like	3.38823e-42	54.9451	165.236	Astacin (Peptidase family M12A)	6.4e-33	148.3	0	0	0	0	Extracellular	Soluble	SP(Sec/SPI)	0.943411
Res_010259-T1	Hemostasis impairing toxins	1165	Q593B6	Coagulation factor V [Cleaved into: Coagulation factor V heavy chain; Coagulation factor V light chain]	3.31e-17	55.6291	83.5741	P98092	Hemocytin (Humoral lectin)	1.52e-18	55.6338	95.9005	EDO35160	predicted protein	1.85184e-41	72.973	160.229	F5/8 type C domain	8.3e-35	156.4	0	0	0	0	Cytoplasm	Soluble	OTHER	0.001249
Res_010411-T1	Hemostasis impairing toxins	465	A6MFK8	Venom prothrombin activator vestarin-D2 (vPA) (EC 3.4.21.6) (Venom coagulation factor Xa-like protease) [Cleaved into: Vestarin-D2 light chain; Vestarin-D2 heavy chain]	8.12e-12	56.1644	63.1586	P0C6B8	Sushi, von Willebrand factor type A, EGF and pentraxin domain-containing protein 1	1.13e-22	54.717	105.531	XP_002156977	PREDICTED: uncharacterized protein LOC100201344	5.41313e-54	60.2564	191.43	calcium ion binding	1.4e-09	71.2	0	0	0	0	Extracellular	Soluble	SP(Sec/SPI)	0.658607
Res_010411-T2	Hemostasis impairing toxins	482	A6MFK8	Venom prothrombin activator vestarin-D2 (vPA) (EC 3.4.21.6) (Venom coagulation factor Xa-like protease) [Cleaved into: Vestarin-D2 light chain; Vestarin-D2 heavy chain]	8.72e-12	56.1644	63.1586	P0C6B8	Sushi, von Willebrand factor type A, EGF and pentraxin domain-containing protein 1	1.11e-22	54.717	105.531	XP_002156977	PREDICTED: uncharacterized protein LOC100201344	7.32584e-54	60.2564	191.43	calcium ion binding	1.4e-09	71.2	0	0	0	0	Cell membrane	Membrane	OTHER	0.015636
Res_010668-T1	Neurotoxin	246	Q25338	Delta-latroinsectotoxin-Lt1a (Delta-LIT-Lt1a) (Delta-latroinsectotoxin) (Delta-LIT)	2.26e-15	64.0449	71.633	Q25338	Delta-latroinsectotoxin-Lt1a (Delta-LIT-Lt1a) (Delta-latroinsectotoxin) (Delta-LIT)	5.34e-13	64.0449	71.633	XP_012555106	protein phosphatase 1 regulatory subunit 12A-like	6.38082e-20	66.6667	93.9745	Ankyrin repeat domain-containing protein	7.2e-05	54.7	0	5	P:GO:0006621; C:GO:0005783; P:GO:0010869; F:GO:0005102; C:GO:0005623	C:endoplasmic reticulum; C:obsolete cell; P:regulation of receptor biosynthetic process; P:protein retention in ER lumen; F:signaling receptor binding	Cytoplasm	Soluble	OTHER	0.00114
Res_010826-T1	Hemostasis impairing toxins	300	D8VNT0	Ryncolin-4	3.2e-47	57.2727	158.303	Q29116	Tenascin (TN) (Cytotactin) (GMEM) (GP 150-225) (Glioma-associated-extracellular matrix antigen) (Hexabrachion) (JI) (Myotendinous antigen) (Neuronectin) (P230) (Tenascin-C) (TN-C)	4.47e-47	56.5022	172.555	XP_027046951	Fibrinogen C domain-containing protein 1	5.65535e-61	55.7823	206.838	mesenchymal-epithelial cell signaling involved in prostate gland development	1.5e-49	203.4	0	16	P:GO:0060739; P:GO:0010628; P:GO:0030198; P:GO:0060740; P:GO:0007528; P:GO:0060447; F:GO:0001968; P:GO:0043687; P:GO:0014012; C:GO:0005623; C:GO:0005788; P:GO:0007162; P:GO:0008284; C:GO:0005614; F:GO:0045545; C:GO:0005604	P:prostate gland epithelium morphogenesis; C:interstitial matrix; P:mesenchymal-epithelial cell signaling involved in prostate gland development; C:basement membrane; C:endoplasmic reticulum lumen; P:negative regulation of cell adhesion; P:positive regulation of cell population proliferation; F:syndecan binding; P:bud outgrowth involved in lung branching; P:extracellular matrix organization; P:po…	Extracellular	Soluble	OTHER	0.006069
Res_010827-T1	Hemostasis impairing toxins	368	D8VNS7	Ryncolin-1	3.97e-46	58.3333	157.532	P19477	Fibrinogen-like protein A (FREP-A)	1.31e-47	59.6413	166.007	XP_027046950	ficolin-2-like	1.54913e-66	52.2222	224.557	negative regulation of growth rate	4.6e-48	198.7	0	0	0	0	Extracellular	Soluble	SP(Sec/SPI)	0.960209
Res_010828-T1	Hemostasis impairing toxins	369	D8VNT0	Ryncolin-4	2.28e-46	56.338	158.303	Q29116	Tenascin (TN) (Cytotactin) (GMEM) (GP 150-225) (Glioma-associated-extracellular matrix antigen) (Hexabrachion) (JI) (Myotendinous antigen) (Neuronectin) (P230) (Tenascin-C) (TN-C)	1.08e-46	58.1395	174.096	XP_027046950	ficolin-2-like	8.12072e-67	52.0325	225.328	Fibrinogen-related domains (FReDs)	1.1e-49	204.1	0	0	0	0	Extracellular	Soluble	SP(Sec/SPI)	0.781849
Res_010829-T1	Hemostasis impairing toxins	289	D8VNT0	Ryncolin-4	1.21e-47	56.6038	159.073	P19477	Fibrinogen-like protein A (FREP-A)	1.56e-49	61.435	168.318	XP_029180552	ficolin-2-like isoform X1	5.6513e-64	56.5371	215.698	mesenchymal-epithelial cell signaling involved in prostate gland development	7.3e-49	201.1	0	16	P:GO:0060739; P:GO:0010628; P:GO:0030198; P:GO:0060740; P:GO:0007528; P:GO:0060447; F:GO:0001968; P:GO:0043687; P:GO:0014012; C:GO:0005623; C:GO:0005788; P:GO:0007162; P:GO:0008284; C:GO:0005614; F:GO:0045545; C:GO:0005604	P:prostate gland epithelium morphogenesis; C:interstitial matrix; P:mesenchymal-epithelial cell signaling involved in prostate gland development; C:basement membrane; C:endoplasmic reticulum lumen; P:negative regulation of cell adhesion; P:positive regulation of cell population proliferation; F:syndecan binding; P:bud outgrowth involved in lung branching; P:extracellular matrix organization; P:po…	Extracellular	Soluble	OTHER	0.007202
Res_010830-T1	Hemostasis impairing toxins	371	D8VNS7	Ryncolin-1	2.05e-47	61.1111	160.999	P19477	Fibrinogen-like protein A (FREP-A)	2.71e-46	59.1928	162.54	XP_029180552	ficolin-2-like isoform X1	2.98924e-68	53.1532	229.565	mesenchymal-epithelial cell signaling involved in prostate gland development	4.9e-50	205.3	0	16	P:GO:0060739; P:GO:0010628; P:GO:0030198; P:GO:0060740; P:GO:0007528; P:GO:0060447; F:GO:0001968; P:GO:0043687; P:GO:0014012; C:GO:0005623; C:GO:0005788; P:GO:0007162; P:GO:0008284; C:GO:0005614; F:GO:0045545; C:GO:0005604	P:prostate gland epithelium morphogenesis; C:interstitial matrix; P:mesenchymal-epithelial cell signaling involved in prostate gland development; C:basement membrane; C:endoplasmic reticulum lumen; P:negative regulation of cell adhesion; P:positive regulation of cell population proliferation; F:syndecan binding; P:bud outgrowth involved in lung branching; P:extracellular matrix organization; P:po…	Extracellular	Soluble	SP(Sec/SPI)	0.710479
Res_010831-T1	Hemostasis impairing toxins	255	D8VNT0	Ryncolin-4	6.3e-52	56.8807	169.088	D8VNT0	Ryncolin-4	1.49e-49	56.8807	169.088	XP_011405415	Fibrinogen C domain-containing protein 1	2.5527e-59	62.0853	198.749	negative regulation of axon extension involved in regeneration	6.4e-49	201.1	0	20	C:GO:0072534; P:GO:0007158; P:GO:0007411; P:GO:0051971; P:GO:0030198; C:GO:0045121; P:GO:0008306; P:GO:0022029; P:GO:0050805; P:GO:0060291; C:GO:0009986; P:GO:0022408; P:GO:0050808; F:GO:0046625; C:GO:0005623; P:GO:0050885; P:GO:0035641; F:GO:0005178; P:GO:0048692; P:GO:0051968	C:perineuronal net; P:long-term synaptic potentiation; P:associative learning; C:membrane raft; F:integrin binding; F:sphingolipid binding; P:positive regulation of synaptic transmission, glutamatergic; P:extracellular matrix organization; P:negative regulation of cell-cell adhesion; C:cell surface; P:negative regulation of axon extension involved in regeneration; P:synapse organization; P:positi…	Extracellular	Soluble	OTHER	0.005331
Res_010913-T1	Proteases	1000	Q2UXQ5	Zinc metalloproteinase-disintegrin-like EoVMP2 (EC 3.4.24.-) (Haemorrhagic 56 kDa metalloproteinase) (Snake venom metalloproteinase) (SVMP) (Zinc metalloproteinase-disintegrin-like Eoc22)	8.14e-25	46.8227	106.686	Q13443	Disintegrin and metalloproteinase domain-containing protein 9 (ADAM 9) (EC 3.4.24.-) (Cellular disintegrin-related protein) (Meltrin-gamma) (Metalloprotease/disintegrin/cysteine-rich protein 9) (Myeloma cell metalloproteinase)	1e-25	49.2754	117.857	XP_019620048	disintegrin and metalloproteinase domain-containing protein 9-like isoform X1	7.57262e-63	48.9879	244.973	Disintegrin and metalloproteinase domain-containing protein	1.1e-24	122.5	0	31	P:GO:0051384; P:GO:0033631; P:GO:0033630; P:GO:0051088; P:GO:0051044; P:GO:0034241; P:GO:0007229; F:GO:0005080; P:GO:0042542; C:GO:0005615; C:GO:0005737; C:GO:0016323; P:GO:0051549; P:GO:0050714; P:GO:0051704; P:GO:0051592; P:GO:0034612; P:GO:0007179; P:GO:0000186; F:GO:0004222; F:GO:0017124; F:GO:0005518; P:GO:0042117; C:GO:0031233; F:GO:0043236; P:GO:0010042; P:GO:0071222; C:GO:0005623; F:GO:00…	P:cell-matrix adhesion; P:response to tumor necrosis factor; P:PMA-inducible membrane protein ectodomain proteolysis; C:extracellular space; P:response to glucocorticoid; F:integrin binding; P:positive regulation of membrane protein ectodomain proteolysis; C:cytoplasm; P:positive regulation of keratinocyte migration; P:positive regulation of macrophage fusion; P:positive regulation of cell adhesi…	Extracellular	Membrane	OTHER	0.178122
Res_011073-T1	Cysteine-rich Proteins	241	P35779	Venom allergen 3 (Allergen Sol r III) (Cysteine-rich venom protein) (CRVP) (Venom allergen III) (allergen Sol r 3)	5.32e-14	47.7612	65.0846	P47033	Cell wall protein PRY3 (Pathogenesis-related protein 3)	4.51e-19	47.5676	88.9669	KXJ21198	Golgi-associated plant pathogenesis-related protein 1	2.0287e-26	56.875	112.464	Belongs to the CRISP family	1.2e-20	107.1	0	6	C:GO:0009986; P:GO:0035690; C:GO:0005576; C:GO:0005623; P:GO:0051704; P:GO:0009405	C:cell surface; P:multi-organism process; P:pathogenesis; C:obsolete cell; C:extracellular region; P:cellular response to drug	Extracellular	Soluble	SP(Sec/SPI)	0.950092
Res_011146-T1	Neurotoxin	1300	Q25338	Delta-latroinsectotoxin-Lt1a (Delta-LIT-Lt1a) (Delta-latroinsectotoxin) (Delta-LIT)	2.81e-12	55.1402	67.3958	Q0P5G1	Tonsoku-like protein (Inhibitor of kappa B-related protein) (I-kappa-B-related protein) (IkappaBR) (NF-kappa-B inhibitor-like protein 2) (Nuclear factor of kappa light polypeptide gene enhancer in B-cells inhibitor-like 2)	8.96e-113	45.7795	389.037	XP_022806153, PFX15665	Tonsoku-like protein	0	52.6651	600.512	replication fork processing	1.7e-81	311.6	0	18	C:GO:0043596; C:GO:0000813; P:GO:0031297; P:GO:0031397; F:GO:0003714; P:GO:0043328; P:GO:1903507; P:GO:0000724; P:GO:0045732; P:GO:0042994; C:GO:0016604; C:GO:0005886; C:GO:0005623; C:GO:0005769; P:GO:2000397; F:GO:0043130; F:GO:0042393; C:GO:0005829	C:early endosome; P:replication fork processing; P:protein transport to vacuole involved in ubiquitin-dependent protein catabolic process via the multivesicular body sorting pathway; F:histone binding; P:positive regulation of ubiquitin-dependent endocytosis; C:plasma membrane; C:cytosol; C:ESCRT I complex; P:double-strand break repair via homologous recombination; P:positive regulation of protei…	Cytoplasm	Soluble	OTHER	0.00083
Res_011259-T1	Other toxins	471	A6MFL0	L-amino-acid oxidase (DvLAAO) (LAO) (EC 1.4.3.2)	2.95e-17	44.1113	80.1073	O64411	Polyamine oxidase 1 (EC 1.5.3.14) (EC 1.5.3.15)	9.14e-70	53.1646	233.417	XP_020622654	polyamine oxidase-like	1.27128e-108	61.1111	340.887	Flavin containing amine oxidoreductase	1.5e-83	317	EC:1.5.3.16; EC:1.5.3.14	0	0	0	Endoplasmic reticulum	Soluble	SP(Sec/SPI)	0.970832
Res_011259-T2	Other toxins	502	A6MFL0	L-amino-acid oxidase (DvLAAO) (LAO) (EC 1.4.3.2)	1.28e-17	43.9271	81.6481	O64411	Polyamine oxidase 1 (EC 1.5.3.14) (EC 1.5.3.15)	3.26e-69	53.1646	232.646	XP_020622654	polyamine oxidase-like	1.58832e-107	61.9048	339.347	Flavin containing amine oxidoreductase	1.6e-83	317	EC:1.5.3.16; EC:1.5.3.14	0	0	0	Endoplasmic reticulum	Soluble	SP(Sec/SPI)	0.970832
Res_011260-T1	Proteases	346	K7Z9Q9	Nematocyst expressed protein 6 (NEP-6) (EC 3.4.24.-) (Astacin-like metalloprotease toxin)	2.13e-28	48.3271	108.227	K7Z9Q9	Nematocyst expressed protein 6 (NEP-6) (EC 3.4.24.-) (Astacin-like metalloprotease toxin)	5.05e-26	48.3271	108.227	KXJ09471	Zinc metalloproteinase nas-8	2.61355e-27	50.4032	122.479	metalloendopeptidase activity	5.9e-21	108.6	EC:3.4.24.67; EC:3.4.24.66	11	P:GO:0010954; C:GO:0030133; P:GO:0007155; F:GO:0004222; C:GO:0005886; C:GO:0005623; P:GO:2000360; C:GO:0060473; P:GO:0060468; F:GO:0070002; F:GO:0070001	F:aspartic-type peptidase activity; F:glutamic-type peptidase activity; C:transport vesicle; C:cortical granule; F:metalloendopeptidase activity; C:obsolete cell; P:positive regulation of protein processing; P:prevention of polyspermy; P:negative regulation of binding of sperm to zona pellucida; P:cell adhesion; C:plasma membrane	Extracellular	Soluble	SP(Sec/SPI)	0.984509
Res_011267-T1	Neurotoxin	196	G0LXV8	Alpha-latrotoxin-Lh1a (Alpha-LTX-Lh1a) (Alpha-latrotoxin) (Fragment)	4.06e-08	51.6484	48.9062	Q8NFD2	Ankyrin repeat and protein kinase domain-containing protein 1 (EC 2.7.11.1) (Protein kinase PKK2) (Sugen kinase 288) (SgK288) (X-kinase)	4.62e-14	62.2222	73.1738	XP_012556841	protein phosphatase 1 regulatory subunit 27-like	2.17282e-23	60.1695	101.679	blood vessel endothelial cell proliferation involved in sprouting angiogenesis	0.00017	53.1	0	10	P:GO:0001938; P:GO:0002043; P:GO:0090263; P:GO:1902367; P:GO:0000122; P:GO:0001755; P:GO:0045581; P:GO:0001569; P:GO:0050931; P:GO:0032525	P:somite rostral/caudal axis specification; P:blood vessel endothelial cell proliferation involved in sprouting angiogenesis; P:negative regulation of Notch signaling pathway involved in somitogenesis; P:negative regulation of T cell differentiation; P:positive regulation of endothelial cell proliferation; P:negative regulation of transcription by RNA polymerase II; P:branching involved in blood …	Cytoplasm	Soluble	OTHER	0.00018
Res_011383-T1	Cysteine-rich Proteins	1856	P35780	Venom allergen 5 (Allergen Pol f V) (Antigen 5) (Ag5) (Cysteine-rich venom protein) (CRVP) (allergen Pol f 5)	3.78e-12	54.8387	63.5438	Q9H4G4	Golgi-associated plant pathogenesis-related protein 1 (GAPR-1) (Golgi-associated PR-1 protein) (Glioma pathogenesis-related protein 2) (GliPR 2)	2.23e-17	55.4054	84.3445	XP_012561264	protein PRY1-like isoform X3	5.11983e-94	50.5327	345.125	positive regulation of epithelial to mesenchymal transition	1.8e-100	375.2	0	0	0	0	Extracellular	Soluble	SP(Sec/SPI)	0.827168
Res_011385-T1	Cysteine-rich Proteins	4621	Q8AVA3	Cysteine-rich venom protein pseudecin (CRVP Pdc)	4.34e-12	43.7126	65.4698	Q9H4G4	Golgi-associated plant pathogenesis-related protein 1 (GAPR-1) (Golgi-associated PR-1 protein) (Glioma pathogenesis-related protein 2) (GliPR 2)	6.29e-25	58.2781	107.071		---NA---				positive regulation of epithelial to mesenchymal transition	6.4e-123	451.1	0	0	0	0	Cytoplasm	Soluble	OTHER	0.000925
Res_011481-T1	Hemostasis impairing toxins	368	D8VNT0	Ryncolin-4	1.36e-48	57.6744	164.081	P19477	Fibrinogen-like protein A (FREP-A)	1.13e-48	60.0897	168.703	XP_029180552	ficolin-2-like	1.2251e-67	53.4535	228.024	negative regulation of axon extension involved in regeneration	2.1e-48	199.9	0	20	C:GO:0072534; P:GO:0007158; P:GO:0007411; P:GO:0051971; P:GO:0030198; C:GO:0045121; P:GO:0008306; P:GO:0022029; P:GO:0050805; P:GO:0060291; C:GO:0009986; P:GO:0022408; P:GO:0050808; F:GO:0046625; C:GO:0005623; P:GO:0050885; P:GO:0035641; F:GO:0005178; P:GO:0048692; P:GO:0051968	C:perineuronal net; P:long-term synaptic potentiation; P:associative learning; C:membrane raft; F:integrin binding; F:sphingolipid binding; P:positive regulation of synaptic transmission, glutamatergic; P:extracellular matrix organization; P:negative regulation of cell-cell adhesion; C:cell surface; P:negative regulation of axon extension involved in regeneration; P:synapse organization; P:positi…	Extracellular	Soluble	SP(Sec/SPI)	0.710479
Res_011809-T1	Hemostasis impairing toxins	283	D8VNS8	Ryncolin-2	6.58e-30	51.6854	112.079	O75636	Ficolin-3 (Collagen/fibrinogen domain-containing lectin 3 p35) (Collagen/fibrinogen domain-containing protein 3) (Hakata antigen)	2.83e-34	53.1792	129.028	EDO49905	ficolin-3 isoform X1	2.43739e-36	58.046	139.043	Fibrinogen-related domains (FReDs)	8.7e-31	141	0	13	P:GO:1902679; F:GO:0030246; P:GO:0072376; P:GO:0006508; F:GO:0003823; P:GO:0043901; P:GO:0043654; P:GO:0051607; C:GO:0005576; P:GO:0001867; P:GO:0046597; P:GO:0098657; F:GO:0004252	P:complement activation, lectin pathway; P:defense response to virus; P:protein activation cascade; P:negative regulation of RNA biosynthetic process; P:import into cell; P:recognition of apoptotic cell; P:proteolysis; C:extracellular region; P:negative regulation of multi-organism process; F:serine-type endopeptidase activity; F:carbohydrate binding; P:negative regulation of viral entry into hos…	Extracellular	Soluble	SP(Sec/SPI)	0.943732
Res_011810-T1	Hemostasis impairing toxins	218	D8VNS7	Ryncolin-1	1.01e-13	54.8387	65.0846	Q29041	Ficolin-2 (Collagen/fibrinogen domain-containing protein 2) (Ficolin-B) (Ficolin-beta) (L-ficolin)	9.3e-12	44	66.2402	XP_002596800	fibrinogen C domain-containing protein 1-like	1.86381e-16	49.6644	85.5001	peptidase activity	5.2e-15	88.2	0	0	0	0	Extracellular	Soluble	SP(Sec/SPI)	0.865685
Res_011907-T1	Hemostasis impairing toxins	363	E2IYB3	Veficolin-1 (Fragment)	2.21e-18	59.0361	79.337	Q2KJ51	Angiopoietin-related protein 4 (Angiopoietin-like protein 4) [Cleaved into: ANGPTL4 N-terminal chain; ANGPTL4 C-terminal chain]	4.52e-17	61.6279	85.1149	XP_028390920	fibrinogen-like protein A	6.47345e-22	54.7009	102.834	mesenchymal-epithelial cell signaling involved in prostate gland development	1.2e-16	94.4	0	16	P:GO:0060739; P:GO:0010628; P:GO:0030198; P:GO:0060740; P:GO:0007528; P:GO:0060447; F:GO:0001968; P:GO:0043687; P:GO:0014012; C:GO:0005623; C:GO:0005788; P:GO:0007162; P:GO:0008284; C:GO:0005614; F:GO:0045545; C:GO:0005604	P:prostate gland epithelium morphogenesis; C:interstitial matrix; P:mesenchymal-epithelial cell signaling involved in prostate gland development; C:basement membrane; C:endoplasmic reticulum lumen; P:negative regulation of cell adhesion; P:positive regulation of cell population proliferation; F:syndecan binding; P:bud outgrowth involved in lung branching; P:extracellular matrix organization; P:po…	Cytoplasm	Soluble	OTHER	0.000959
Res_011908-T1	Hemostasis impairing toxins	362	D8VNT0	Ryncolin-4	1.24e-49	60.4762	166.777	Q6AX44	Fibrinogen C domain-containing protein 1-A	4.99e-50	59.9078	176.792	XP_028418010	microfibril-associated glycoprotein 4-like	2.2014e-62	60.5691	211.46	chitin binding	2.2e-50	206.5	0	2	C:GO:0016020; F:GO:0008061	F:chitin binding; C:membrane	Extracellular	Soluble	SP(Sec/SPI)	0.730769
Res_011937-T1	Hemostasis impairing toxins	575	P22030	Snaclec botrocetin subunit beta (Platelet coagglutinin)	9.76e-16	49.2537	70.0922	Q9H4G4	Golgi-associated plant pathogenesis-related protein 1 (GAPR-1) (Golgi-associated PR-1 protein) (Glioma pathogenesis-related protein 2) (GliPR 2)	1.66e-20	52.6667	91.6633	NP_001274304, AAN52336	proline-rich protein 36-like	1.99414e-163	59.589	494.582	peptidase inhibitor activity	5e-126	458.4	0	10	P:GO:0006909; F:GO:0004888; C:GO:0005623; C:GO:0005887; P:GO:0098657; P:GO:0007165; C:GO:0099568; C:GO:0005938; P:GO:0006897; C:GO:0030175	C:integral component of plasma membrane; C:cell cortex; P:import into cell; P:signal transduction; C:obsolete cell; F:transmembrane signaling receptor activity; C:cytoplasmic region; C:filopodium; P:endocytosis; P:phagocytosis	Extracellular	Soluble	SP(Sec/SPI)	0.991962
Res_012096-T1	Hemostasis impairing toxins	198	D8VNT0	Ryncolin-4	3e-42	59.7765	141.739	P10039	Tenascin (TN) (Cytotactin) (GMEM) (GP 150-225) (Glioma-associated-extracellular matrix antigen) (Hexabrachion) (JI) (Myotendinous antigen) (Neuronectin) (Tenascin-C) (TN-C)	2.07e-45	60	163.31	XP_019855863	fibrinogen C domain-containing protein 1-like	6.42315e-50	63.0208	173.326	mesenchymal-epithelial cell signaling involved in prostate gland development	2e-42	179.1	0	16	P:GO:0060739; P:GO:0010628; P:GO:0030198; P:GO:0060740; P:GO:0007528; P:GO:0060447; F:GO:0001968; P:GO:0043687; P:GO:0014012; C:GO:0005623; C:GO:0005788; P:GO:0007162; P:GO:0008284; C:GO:0005614; F:GO:0045545; C:GO:0005604	P:prostate gland epithelium morphogenesis; C:interstitial matrix; P:mesenchymal-epithelial cell signaling involved in prostate gland development; C:basement membrane; C:endoplasmic reticulum lumen; P:negative regulation of cell adhesion; P:positive regulation of cell population proliferation; F:syndecan binding; P:bud outgrowth involved in lung branching; P:extracellular matrix organization; P:po…	Extracellular	Soluble	OTHER	0.006297
Res_012594-T1	Pore-forming toxins	1217	Q91453	Stonustoxin subunit beta (SNTX subunit beta) (DELTA-synanceitoxin-Sh1b) (DELTA-SYTX-Sh1b) (Trachynilysin subunit beta) (TLY subunit beta)	8.67e-30	46.9274	123.25	Q91453	Stonustoxin subunit beta (SNTX subunit beta) (DELTA-synanceitoxin-Sh1b) (DELTA-SYTX-Sh1b) (Trachynilysin subunit beta) (TLY subunit beta)	2.05e-27	46.9274	123.25	XP_028397642	p-loop containing nucleoside triphosphate hydrolase	0	60.8806	870.922	0	3.5e-193	682.6	0	0	0	0	Cytoplasm	Soluble	OTHER	0.000384
Res_012847-T1	Proteases	752	Q2LD49	Zinc metalloproteinase-disintegrin-like TSV-DM (EC 3.4.24.-) (Snake venom metalloproteinase) (SVMP)	6.66e-18	38.6364	83.9593	Q9VAC5	ADAM 17-like protease (EC 3.4.24.-)	1.32e-159	56.0669	483.026	XP_031555460	ADAM 17-like protease	1.5086e-178	57.2011	539.265	It is involved in the biological process described with proteolysis	4.6e-119	435.6	EC:3.4.24.86	3	C:GO:0016021; F:GO:0004222; P:GO:0006509	F:metalloendopeptidase activity; P:membrane protein ectodomain proteolysis; C:integral component of membrane	Cell membrane	Membrane	OTHER	0.228161
Res_013018-T1	Proteases	570	C9E1S0	Zinc metalloproteinase-disintegrin-like VMP-III (AplVMP-III) (EC 3.4.24.-) (Snake venom metalloproteinase) (SVMP)	4.28e-17	40.1961	80.4925	O77633	Disintegrin and metalloproteinase domain-containing protein 10 (ADAM 10) (EC 3.4.24.81) (Kuzbanian protein homolog) (Mammalian disintegrin-metalloprotease) (CD antigen CD156c)	1.01e-133	57.9787	410.223	XP_012559583	disintegrin and metalloproteinase domain-containing protein 10	3.20246e-140	62.5668	434.876	constitutive protein ectodomain proteolysis	8.8e-115	421	EC:3.4.24.81	26	C:GO:0016021; P:GO:1902667; P:GO:0007400; P:GO:0007220; P:GO:0003007; P:GO:0035051; P:GO:0040025; P:GO:0045138; P:GO:0061320; P:GO:0042661; P:GO:0009792; P:GO:0048542; P:GO:0008347; F:GO:0005515; P:GO:0007298; F:GO:0004222; P:GO:0007519; C:GO:0030659; P:GO:0007419; P:GO:0007219; C:GO:0005886; P:GO:0006509; P:GO:0035386; C:GO:0005623; P:GO:0030516; P:GO:0030511	P:regulation of axon guidance; P:Notch signaling pathway; P:neuroblast fate determination; P:glial cell migration; P:border follicle cell migration; P:pericardial nephrocyte differentiation; P:embryo development ending in birth or egg hatching; P:membrane protein ectodomain proteolysis; C:integral component of membrane; P:lymph gland development; P:Notch receptor processing; P:vulval development;…	Extracellular	Soluble	SP(Sec/SPI)	0.937685
Res_013070-T1	Hemostasis impairing toxins	484	D8VNT0	Ryncolin-4	1.32e-39	61.2121	142.895	Q9D1H9	Microfibril-associated glycoprotein 4	2.11e-40	59.8958	149.058	XP_027046950	microfibril-associated glycoprotein 4 isoform X1	4.45549e-52	52.2523	190.66	Fibrinogen-related domains (FReDs)	6.7e-39	168.7	0	14	F:GO:0030971; F:GO:0030297; P:GO:0043536; P:GO:0009967; P:GO:0043537; P:GO:0045766; P:GO:0061098; P:GO:0043066; P:GO:0071456; P:GO:2000273; P:GO:0007171; C:GO:0005615; P:GO:0050900; P:GO:0016525	C:extracellular space; P:negative regulation of blood vessel endothelial cell migration; P:positive regulation of signal transduction; F:transmembrane receptor protein tyrosine kinase activator activity; F:receptor tyrosine kinase binding; P:positive regulation of blood vessel endothelial cell migration; P:positive regulation of angiogenesis; P:activation of transmembrane receptor protein tyrosin…	Nucleus	Soluble	OTHER	0.002174
Res_013076-T1	Hemostasis impairing toxins	270	D8VNS7	Ryncolin-1	3.72e-37	55.8442	130.954	Q29042	Ficolin-1 (Ficolin-A) (Ficolin-alpha)	1.57e-38	58.3815	140.198	XP_029211140	ficolin-2-like isoform X1	8.64252e-45	45.1923	164.851	Fibrinogen C	3.2e-38	165.6	0	2	C:GO:0016020; F:GO:0008061	F:chitin binding; C:membrane	Extracellular	Soluble	OTHER	0.001242
Res_013081-T1	Hemostasis impairing toxins	320	D8VNS7	Ryncolin-1	1.02e-33	56.5789	123.25	O70497	Ficolin-2 (Collagen/fibrinogen domain-containing protein 2) (Ficolin-B) (Ficolin-beta) (L-ficolin)	7.01e-33	52.8796	126.716	XP_001637509	ficolin-2-like	1.47641e-46	42.0366	171.785	Fibrinogen-related domains (FReDs)	7.8e-36	157.9	0	2	C:GO:0016020; F:GO:0008061	F:chitin binding; C:membrane	Extracellular	Soluble	SP(Sec/SPI)	0.986502
Res_013082-T1	Hemostasis impairing toxins	324	D8VNS7	Ryncolin-1	8.32e-37	62.8571	131.724	Q9WTS8	Ficolin-1 (Collagen/fibrinogen domain-containing protein 1) (Ficolin-A) (Ficolin-alpha) (M-ficolin)	1.57e-37	60.8187	139.428	XP_001637509	fibrinogen-like protein A	7.94886e-50	43.9791	180.644	Fibrinogen-related domains (FReDs)	4e-40	172.2	0	2	C:GO:0016020; F:GO:0008061	F:chitin binding; C:membrane	Extracellular	Soluble	SP(Sec/SPI)	0.92478
Res_013084-T1	Hemostasis impairing toxins	243	D8VNS7	Ryncolin-1	6.87e-20	58.1395	83.5741	Q29042	Ficolin-1 (Ficolin-A) (Ficolin-alpha)	8.62e-21	62.7907	92.0485	XP_028414837	fibrinogen C domain-containing protein 1-like	1.39689e-26	46.748	115.546	Fibrinogen-related domains (FReDs)	3.2e-21	109	0	2	C:GO:0016020; F:GO:0008061	F:chitin binding; C:membrane	Extracellular	Soluble	SP(Sec/SPI)	0.952057
Res_013085-T1	Hemostasis impairing toxins	326	D8VNS7	Ryncolin-1	3.64e-33	58	122.094	Q05546	Tenascin-R (TN-R) (Janusin) (Neural recognition molecule J1-160/180) (Restrictin)	8.05e-35	56.213	137.887	XP_020628452	microfibril-associated glycoprotein 4-like	2.97012e-44	51.4403	161.77	Fibrinogen-related domains (FReDs)	2.1e-36	159.8	0	2	C:GO:0016020; F:GO:0008061	F:chitin binding; C:membrane	Extracellular	Soluble	SP(Sec/SPI)	0.942711
Res_013174-T1	Hemostasis impairing toxins	303	D8VNT0	Ryncolin-4	3.14e-35	56.2914	126.716	P19477	Fibrinogen-like protein A (FREP-A)	1.33e-37	58.9888	137.887	XP_028408748	microfibril-associated glycoprotein 4-like	1.94579e-45	64.7799	163.696	Fibrinogen and fibronectin	7.4e-36	157.9	0	0	0	0	Extracellular	Soluble	SP(Sec/SPI)	0.886258
Res_013631-T1	Hemostasis impairing toxins	301	Q7SZN0	Venom prothrombin activator pseutarin-C non-catalytic subunit (PCNS) (vPA) (Venom coagulation factor Va-like protein) [Cleaved into: Pseutarin-C non-catalytic subunit heavy chain; Pseutarin-C non-catalytic subunit light chain]	1.18e-20	50.9554	88.5817	P28824	Neuropilin-1 (A5 antigen) (A5 protein)	3.53e-20	51.9231	93.9745	XP_002155492	lactadherin-like	3.25566e-52	68.9441	179.104	protein tyrosine kinase collagen receptor activity	6.9e-42	177.9	EC:2.7.10.1	2	P:GO:0008045; P:GO:0048680	P:motor neuron axon guidance; P:positive regulation of axon regeneration	Extracellular	Soluble	OTHER	0.139535
Res_014069-T1	Neurotoxin	655	Q25338	Delta-latroinsectotoxin-Lt1a (Delta-LIT-Lt1a) (Delta-latroinsectotoxin) (Delta-LIT)	4.35e-18	50.7317	84.7297	P97819	85/88 kDa calcium-independent phospholipase A2 (CaI-PLA2) (EC 3.1.1.4) (2-lysophosphatidylcholine acylhydrolase) (EC 3.1.1.5) (Group VI phospholipase A2) (GVI PLA2) (Intracellular membrane-associated calcium-independent phospholipase A2 beta) (iPLA2-beta) (Palmitoyl-CoA hydrolase) (EC 3.1.2.2) (Patatin-like phospholipase domain-containing protein 9) (PNPLA9)	8.09e-150	57.8387	456.833	XP_020898913, KXJ27120	85/88 kDa calcium-independent phospholipase A2 isoform X2	3.15003e-165	58.7183	503.442	lipid catabolic process	3.4e-110	406	EC:3.1.1.4	34	P:GO:0032049; P:GO:0007204; F:GO:0017171; P:GO:1902884; P:GO:0060135; P:GO:0097164; P:GO:1901339; P:GO:0006897; P:GO:0090037; F:GO:0043008; P:GO:0098657; P:GO:0090238; P:GO:0035774; C:GO:0005615; P:GO:0051967; C:GO:0005815; P:GO:0070328; P:GO:0014832; P:GO:0034976; P:GO:2000304; P:GO:0007613; P:GO:0019731; P:GO:0038096; P:GO:0045921; F:GO:0019901; P:GO:0090200; P:GO:0036151; P:GO:0036152; P:GO:00…	P:urinary bladder smooth muscle contraction; P:positive regulation of exocytosis; C:extracellular space; P:import into cell; P:maternal process involved in female pregnancy; P:phosphatidylcholine acyl-chain remodeling; P:cardiolipin biosynthetic process; P:positive regulation of arachidonic acid secretion; C:cytosol; C:microtubule organizing center; P:positive regulation of blood vessel diameter;…	Cytoplasm	Soluble	OTHER	0.000927
Res_014151-T1	Hemostasis impairing toxins	689	D8VNS7	Ryncolin-1	1.01e-52	56.8075	182.185	P19477	Fibrinogen-like protein A (FREP-A)	3.26e-54	61.1111	190.66	XP_015772740	fibrinogen C domain-containing protein 1-like isoform X2	6.60255e-71	61.3559	242.662	mesenchymal-epithelial cell signaling involved in prostate gland development	3.5e-57	229.9	0	16	P:GO:0060739; P:GO:0010628; P:GO:0030198; P:GO:0060740; P:GO:0007528; P:GO:0060447; F:GO:0001968; P:GO:0043687; P:GO:0014012; C:GO:0005623; C:GO:0005788; P:GO:0007162; P:GO:0008284; C:GO:0005614; F:GO:0045545; C:GO:0005604	P:prostate gland epithelium morphogenesis; C:interstitial matrix; P:mesenchymal-epithelial cell signaling involved in prostate gland development; C:basement membrane; C:endoplasmic reticulum lumen; P:negative regulation of cell adhesion; P:positive regulation of cell population proliferation; F:syndecan binding; P:bud outgrowth involved in lung branching; P:extracellular matrix organization; P:po…	Lysosome/Vacuole	Membrane	OTHER	0.000521
Res_014153-T1	Proteases	731	O42138	Zinc metalloproteinase-disintegrin-like ACLD (EC 3.4.24.-) (Snake venom metalloproteinase) (SVMP) (VMP-III) (AclVMP-III)	7.8e-96	48.3974	306.605	Q61824	Disintegrin and metalloproteinase domain-containing protein 12 (ADAM 12) (EC 3.4.24.-) (Meltrin-alpha)	1.17e-105	51.0769	346.28	XP_014432560	disintegrin and metalloproteinase domain-containing protein 12	4.21124e-116	49.0013	378.252	Disintegrin and metalloproteinase domain-containing protein	3.8e-102	379.4	0	51	C:GO:0016021; P:GO:0007520; P:GO:1900121; P:GO:0051088; P:GO:0051044; P:GO:0042127; P:GO:0060317; F:GO:0005080; P:GO:0042246; F:GO:0008270; C:GO:0005654; P:GO:0030308; P:GO:0050714; P:GO:0051592; P:GO:0001890; F:GO:0004222; F:GO:0017124; F:GO:0005518; P:GO:0045766; C:GO:0031233; F:GO:0043236; P:GO:0022617; P:GO:0010042; P:GO:0071222; P:GO:0045087; P:GO:0051384; P:GO:0033631; P:GO:0033630; P:GO:00…	P:myoblast fusion; P:PMA-inducible membrane protein ectodomain proteolysis; P:response to glucocorticoid; P:negative regulation of cell growth; F:integrin binding; P:positive regulation of keratinocyte migration; P:cellular response to phorbol 13-acetate 12-myristate; P:positive regulation of macrophage fusion; P:negative regulation of cell-matrix adhesion; C:extracellular exosome; P:positive reg…	Cell membrane	Membrane	SP(Sec/SPI)	0.86135
Res_014154-T1	Proteases	750	Q4VM07	Zinc metalloproteinase-disintegrin-like VLAIP-B (EC 3.4.24.-) (Snake venom metalloproteinase) (SVMP)	4.95e-90	48.5997	291.582	Q9XSL6	Disintegrin and metalloproteinase domain-containing protein 28 (ADAM 28) (EC 3.4.24.-) (Epididymal metalloproteinase-like, disintegrin-like, and cysteine-rich protein II) (eMDC II)	2.28e-103	47.6117	337.806	XP_016892800	disintegrin and metalloproteinase domain-containing protein 12	5.70289e-121	51.8692	395.971	disintegrin and metalloproteinase	4e-107	396	0	0	0	0	Cell membrane	Membrane	SP(Sec/SPI)	0.987618
Res_014715-T1	Proteases	190	Q90282	Zinc metalloproteinase-disintegrin-like VAP2B (EC 3.4.24.-) (Catrocollastatin) (Snake venom metalloproteinase) (SVMP) (Vascular apoptosis-inducing protein 2B) (VAP2B) [Cleaved into: Disintegrin-like catrocollastatin-C]	6.15e-15	48.1481	68.5514	Q90282	Zinc metalloproteinase-disintegrin-like VAP2B (EC 3.4.24.-) (Catrocollastatin) (Snake venom metalloproteinase) (SVMP) (Vascular apoptosis-inducing protein 2B) (VAP2B) [Cleaved into: Disintegrin-like catrocollastatin-C]	1.46e-12	48.1481	68.5514	XP_032240108	snake venom metalloproteinase H4-like	1.91261e-25	56.6138	113.62	Disintegrin and metalloproteinase domain-containing protein 20	6.7e-11	74.3	0	12	C:GO:0009897; C:GO:0030424; F:GO:0008237; C:GO:0005623; C:GO:0005887; P:GO:0007283; P:GO:0006508; F:GO:0005178; P:GO:0007339; P:GO:0060468; C:GO:1990913; C:GO:0043025	C:integral component of plasma membrane; C:neuronal cell body; P:binding of sperm to zona pellucida; C:external side of plasma membrane; C:sperm head plasma membrane; F:metallopeptidase activity; C:obsolete cell; P:proteolysis; F:integrin binding; P:prevention of polyspermy; P:spermatogenesis; C:axon	Cytoplasm	Soluble	OTHER	0.000691
Res_015039-T1	Hemostasis impairing toxins	1043	Q58L91	Venom prothrombin activator oscutarin-C non-catalytic subunit (vPA) (Venom coagulation factor Va-like protein) [Cleaved into: Oscutarin-C non-catalytic subunit heavy chain; Oscutarin-C non-catalytic subunit light chain]	6.84e-06	46.2963	46.2098	P70490	Lactadherin (MFGM) (Milk fat globule-EGF factor 8) (MFG-E8) (O-acetyl GD3 ganglioside synthase) (AGS) (SED1)	8.12e-16	53.7634	84.7297	XP_031566662	Receptor-type tyrosine-protein phosphatase S	1.02646e-16	57.8313	98.5969	single fertilization	9.4e-14	86.3	0	17	F:GO:0008429; C:GO:0019897; F:GO:0001786; P:GO:0045807; P:GO:0043627; P:GO:0006910; P:GO:0006911; C:GO:0009897; P:GO:0043687; P:GO:0043277; C:GO:0005623; C:GO:0005788; P:GO:0098657; P:GO:0008284; F:GO:0005178; C:GO:0005615; P:GO:0050766	C:endoplasmic reticulum lumen; F:phosphatidylserine binding; C:extracellular space; C:external side of plasma membrane; P:response to estrogen; P:positive regulation of cell population proliferation; P:import into cell; F:integrin binding; P:positive regulation of endocytosis; P:positive regulation of phagocytosis; P:apoptotic cell clearance; C:extrinsic component of plasma membrane; P:post-trans…	Cytoplasm	Soluble	OTHER	0.001304
Res_015146-T1	Hemostasis impairing toxins	721	Q58L91	Venom prothrombin activator oscutarin-C non-catalytic subunit (vPA) (Venom coagulation factor Va-like protein) [Cleaved into: Oscutarin-C non-catalytic subunit heavy chain; Oscutarin-C non-catalytic subunit light chain]	3.08e-13	49.0909	69.707	Q03146	Epithelial discoidin domain-containing receptor 1 (Epithelial discoidin domain receptor 1) (EC 2.7.10.1) (CD167 antigen-like family member A) (Cell adhesion kinase) (Discoidin receptor tyrosine kinase) (Protein-tyrosine kinase MPK-6) (Tyrosine kinase DDR) (Tyrosine-protein kinase CAK) (CD antigen CD167a)	7.82e-101	65.0704	333.569	XP_012562957	epithelial discoidin domain-containing receptor 1-like	1.25422e-111	58.8665	369.777	Discoidin domain-containing receptor	1.6e-92	347.4	EC:2.7.10.1	0	0	0	Cell membrane	Membrane	OTHER	0.328927
Res_015352-T1	Hemostasis impairing toxins	312	Q9IAM1	Snaclec agkisacutacin subunit A (Agk-A)	4.72e-13	49.1935	62.003	P49260	Secretory phospholipase A2 receptor (PLA2-R) (PLA2R) (180 kDa secretory phospholipase A2 receptor) (M-type receptor) [Cleaved into: Soluble secretory phospholipase A2 receptor (Soluble PLA2-R) (Soluble PLA2R)]	3.64e-12	48.2143	70.4774	XP_032220098	macrophage mannose receptor 1-like	1.07496e-19	44.8113	100.523	negative regulation of T cell mediated immunity	8.2e-14	84.7	0	5	P:GO:0042130; C:GO:0005886; C:GO:0005623; F:GO:0030247; P:GO:0002710	P:negative regulation of T cell mediated immunity; C:obsolete cell; P:negative regulation of T cell proliferation; F:polysaccharide binding; C:plasma membrane	Extracellular	Soluble	OTHER	0.396787
Res_015415-T1	Proteases	823	Q7M4I3	Venom protease (EC 3.4.21.-) (allergen Bom p 4)	9.35e-31	47.4453	117.857	P81187	Complement factor B (EC 3.4.21.47) (C3/C5 convertase) (EC-VMFB) [Cleaved into: Complement factor B Ba fragment; Complement factor B Bb fragment]	1.31e-60	41.7989	222.631	XP_020627300	complement factor B-like	7.67466e-145	52.7559	460.299	complement activation	1.9e-118	433.7	EC:3.4.21.47; EC:3.4.21.43	0	0	0	Extracellular	Soluble	OTHER	0.17857
Res_015440-T1	Hemostasis impairing toxins	1062	Q7SZN0	Venom prothrombin activator pseutarin-C non-catalytic subunit (PCNS) (vPA) (Venom coagulation factor Va-like protein) [Cleaved into: Pseutarin-C non-catalytic subunit heavy chain; Pseutarin-C non-catalytic subunit light chain]	9.63e-13	43.3048	68.5514	Q62371	Discoidin domain-containing receptor 2 (Discoidin domain receptor 2) (EC 2.7.10.1) (CD167 antigen-like family member B) (Neurotrophic tyrosine kinase, receptor-related 3) (Receptor protein-tyrosine kinase TKT) (Tyrosine-protein kinase TYRO10) (CD antigen CD167b)	1.96e-105	48.6161	353.214	XP_012562956	discoidin domain-containing receptor 2 isoform X2	4.31504e-144	51.3818	466.463	Discoidin domain-containing receptor	5.1e-132	479.2	EC:2.7.10.1	0	0	0	Cell membrane	Membrane	OTHER	0.196414
Res_015440-T2	Hemostasis impairing toxins	1062	Q7SZN0	Venom prothrombin activator pseutarin-C non-catalytic subunit (PCNS) (vPA) (Venom coagulation factor Va-like protein) [Cleaved into: Pseutarin-C non-catalytic subunit heavy chain; Pseutarin-C non-catalytic subunit light chain]	9.63e-13	43.3048	68.5514	Q62371	Discoidin domain-containing receptor 2 (Discoidin domain receptor 2) (EC 2.7.10.1) (CD167 antigen-like family member B) (Neurotrophic tyrosine kinase, receptor-related 3) (Receptor protein-tyrosine kinase TKT) (Tyrosine-protein kinase TYRO10) (CD antigen CD167b)	1.96e-105	48.6161	353.214	XP_012562956	discoidin domain-containing receptor 2 isoform X2	4.31504e-144	51.3818	466.463	Discoidin domain-containing receptor	5.1e-132	479.2	EC:2.7.10.1	0	0	0	Cell membrane	Membrane	OTHER	0.196414
Res_015440-T4	Hemostasis impairing toxins	1050	Q7SZN0	Venom prothrombin activator pseutarin-C non-catalytic subunit (PCNS) (vPA) (Venom coagulation factor Va-like protein) [Cleaved into: Pseutarin-C non-catalytic subunit heavy chain; Pseutarin-C non-catalytic subunit light chain]	9.32e-13	43.3048	68.9366	Q62371	Discoidin domain-containing receptor 2 (Discoidin domain receptor 2) (EC 2.7.10.1) (CD167 antigen-like family member B) (Neurotrophic tyrosine kinase, receptor-related 3) (Receptor protein-tyrosine kinase TKT) (Tyrosine-protein kinase TYRO10) (CD antigen CD167b)	1.45e-105	48.6161	353.214	XP_012562956	discoidin domain-containing receptor 2 isoform X2	3.60475e-144	51.3818	466.077	Discoidin domain-containing receptor	5e-132	479.2	EC:2.7.10.1	0	0	0	Cell membrane	Membrane	SP(Sec/SPI)	0.96377
Res_015440-T5	Hemostasis impairing toxins	1050	Q7SZN0	Venom prothrombin activator pseutarin-C non-catalytic subunit (PCNS) (vPA) (Venom coagulation factor Va-like protein) [Cleaved into: Pseutarin-C non-catalytic subunit heavy chain; Pseutarin-C non-catalytic subunit light chain]	9.32e-13	43.3048	68.9366	Q62371	Discoidin domain-containing receptor 2 (Discoidin domain receptor 2) (EC 2.7.10.1) (CD167 antigen-like family member B) (Neurotrophic tyrosine kinase, receptor-related 3) (Receptor protein-tyrosine kinase TKT) (Tyrosine-protein kinase TYRO10) (CD antigen CD167b)	1.45e-105	48.6161	353.214	XP_012562956	discoidin domain-containing receptor 2 isoform X2	3.60475e-144	51.3818	466.077	Discoidin domain-containing receptor	5e-132	479.2	EC:2.7.10.1	0	0	0	Cell membrane	Membrane	SP(Sec/SPI)	0.96377
Res_015519-T1	Other toxins	207	J3S9D9	Reticulocalbin-2 (Taipoxin-associated calcium-binding protein 49 homolog)	1.26e-31	59.7015	113.235	B5X186	Calumenin-A	1.8e-39	61.0329	140.198	XP_002162407	calumenin isoform X1	1.47274e-65	75	214.157	calcium ion binding	1.2e-56	226.5	0	0	0	0	Cytoplasm	Soluble	OTHER	0.000416
Res_015546-T1	Proteases	1838	C9D7R2	Astacin-like metalloprotease toxin 2 (EC 3.4.24.-) (Loxosceles astacin-like protease 2) (LALP2)	2.08e-30	52.7426	118.242	Q19269	Zinc metalloproteinase nas-14 (EC 3.4.24.-) (Nematode astacin 14)	6.25e-32	52.5692	135.961	XP_020900616	uncharacterized protein LOC110239247	1.79839e-111	47.4138	384.8	Astacin (Peptidase family M12A)	6.2e-61	243.8	0	0	0	0	Cell membrane	Membrane	OTHER	0.00249
Res_015676-T1	Other toxins	373	Q75WF2	Plancitoxin-1 (EC 3.1.22.1) (Plancitoxin I) (Plan-I) [Cleaved into: Plancitoxin-1 subunit alpha; Plancitoxin-1 subunit beta]	4.01e-71	51.2329	223.016	Q75WF2	Plancitoxin-1 (EC 3.1.22.1) (Plancitoxin I) (Plan-I) [Cleaved into: Plancitoxin-1 subunit alpha; Plancitoxin-1 subunit beta]	9.49e-69	51.2329	223.016	XP_012559658	plancitoxin-1 isoform X3	6.60792e-99	64.0118	306.605	deoxyribonuclease II activity	7.1e-81	307.8	EC:3.1.22.1	6	P:GO:0045476; F:GO:0004531; C:GO:0005764; C:GO:0005623; C:GO:0005634; P:GO:0006309	P:nurse cell apoptotic process; C:obsolete cell; P:apoptotic DNA fragmentation; C:nucleus; F:deoxyribonuclease II activity; C:lysosome	Extracellular	Soluble	SP(Sec/SPI)	0.994929
Res_015750-T1	Proteases	733	J3S830	Zinc metalloproteinase-disintegrin-like 3a (EC 3.4.24.-) (Snake venom metalloproteinase) (SVMP)	6.95e-21	36.0915	93.5893	O77633	Disintegrin and metalloproteinase domain-containing protein 10 (ADAM 10) (EC 3.4.24.81) (Kuzbanian protein homolog) (Mammalian disintegrin-metalloprotease) (CD antigen CD156c)	1.45e-136	52.0216	423.32	XP_002154090	disintegrin and metalloproteinase domain-containing protein 10	0	64.4381	679.863	Disintegrin and metalloproteinase domain-containing protein	8.8e-192	677.2	EC:3.4.24.81	0	0	0	Cell membrane	Membrane	SP(Sec/SPI)	0.792727
Res_015755-T1	Protease Inhibitors	697	Q6T269	Kunitz-type serine protease inhibitor bitisilin-3 (Two-Kunitz protease inhibitor) (Fragment)	2.44e-18	52.9915	78.9518	Q96PZ7	CUB and sushi domain-containing protein 1 (CUB and sushi multiple domains protein 1)	7.96e-30	41.853	130.568	XP_022808247, PFX14085	sushi, von Willebrand factor type A, EGF and pentraxin domain-containing protein 1-like isoform X1	1.65073e-73	45.9313	264.618	Sushi, von Willebrand factor type A, EGF and pentraxin	6.9e-45	189.1	0	0	0	0	Extracellular	Soluble	SP(Sec/SPI)	0.982246
Res_015781-T1	Other toxins	346	J3S9D9	Reticulocalbin-2 (Taipoxin-associated calcium-binding protein 49 homolog)	1.11e-16	46.3235	75.8702	Q8BH97	Reticulocalbin-3	1.43e-19	48.5075	91.2781	VDP78896	reticulocalbin-2-like isoform X2	5.26429e-29	50.5576	124.405	Calcium ion binding	2.6e-21	109.8	0	3	C:GO:0005783; C:GO:0005623; P:GO:0007030	C:endoplasmic reticulum; C:obsolete cell; P:Golgi organization	Endoplasmic reticulum	Soluble	SP(Sec/SPI)	0.975062
Res_015951-T1	Hemostasis impairing toxins	432	D8VNS7	Ryncolin-1	5.94e-35	53.7313	129.028	Q29RY7	Fibroleukin (Fibrinogen-like protein 2)	3.03e-36	50.5837	141.354	XP_022107434	microfibril-associated glycoprotein 4-like	1.79317e-40	58.7629	155.992	peptidase activity	8.9e-35	154.8	0	7	P:GO:0043312; C:GO:1904813; C:GO:0009986; F:GO:0016504; C:GO:0005577; C:GO:0005623; P:GO:0010952	C:cell surface; P:neutrophil degranulation; C:obsolete cell; F:peptidase activator activity; P:positive regulation of peptidase activity; C:ficolin-1-rich granule lumen; C:fibrinogen complex	Extracellular	Soluble	OTHER	0.000402
Res_016159-T1	Hemostasis impairing toxins	455	Q58L90	Venom prothrombin activator omicarin-C non-catalytic subunit (vPA) (Venom coagulation factor Va-like protein) [Cleaved into: Omicarin-C non-catalytic subunit heavy chain; Omicarin-C non-catalytic subunit light chain]	7.68e-27	48.0892	110.538	P70490	Lactadherin (MFGM) (Milk fat globule-EGF factor 8) (MFG-E8) (O-acetyl GD3 ganglioside synthase) (AGS) (SED1)	3.92e-36	46.9816	141.354	XP_028517305	venom prothrombin activator pseutarin-C non-catalytic subunit-like	4.01891e-48	49.0991	188.348	coagulation factor V	5.9e-37	162.2	0	13	P:GO:0008015; P:GO:0007596; P:GO:0002576; P:GO:0048208; C:GO:0005794; C:GO:0030134; C:GO:0033116; P:GO:0043687; C:GO:0005886; C:GO:0005623; C:GO:0005788; C:GO:0031093; C:GO:0005615	C:endoplasmic reticulum lumen; P:platelet degranulation; C:extracellular space; C:platelet alpha granule lumen; P:blood circulation; P:COPII vesicle coating; C:plasma membrane; C:endoplasmic reticulum-Golgi intermediate compartment membrane; P:blood coagulation; P:post-translational protein modification; C:obsolete cell; C:COPII-coated ER to Golgi transport vesicle; C:Golgi apparatus	Cytoplasm	Soluble	OTHER	0.005845
Res_016161-T1	Hemostasis impairing toxins	285	Q58L91	Venom prothrombin activator oscutarin-C non-catalytic subunit (vPA) (Venom coagulation factor Va-like protein) [Cleaved into: Oscutarin-C non-catalytic subunit heavy chain; Oscutarin-C non-catalytic subunit light chain]	5.97e-17	43.554	77.0258	P70490	Lactadherin (MFGM) (Milk fat globule-EGF factor 8) (MFG-E8) (O-acetyl GD3 ganglioside synthase) (AGS) (SED1)	2.15e-30	53.5156	121.324	XP_028414250	predicted protein	2.31972e-34	53.0822	141.354	single fertilization	2.2e-26	126.3	0	17	F:GO:0008429; C:GO:0019897; F:GO:0001786; P:GO:0045807; P:GO:0043627; P:GO:0006910; P:GO:0006911; C:GO:0009897; P:GO:0043687; P:GO:0043277; C:GO:0005623; C:GO:0005788; P:GO:0098657; P:GO:0008284; F:GO:0005178; C:GO:0005615; P:GO:0050766	C:endoplasmic reticulum lumen; F:phosphatidylserine binding; C:extracellular space; C:external side of plasma membrane; P:response to estrogen; P:positive regulation of cell population proliferation; P:import into cell; F:integrin binding; P:positive regulation of endocytosis; P:positive regulation of phagocytosis; P:apoptotic cell clearance; C:extrinsic component of plasma membrane; P:post-trans…	Lysosome/Vacuole	Soluble	OTHER	0.003166
Res_016195-T2	Hemostasis impairing toxins	1990	Q58L91	Venom prothrombin activator oscutarin-C non-catalytic subunit (vPA) (Venom coagulation factor Va-like protein) [Cleaved into: Oscutarin-C non-catalytic subunit heavy chain; Oscutarin-C non-catalytic subunit light chain]	1.31e-19	48.1848	92.4337	F1NWE3	Receptor-type tyrosine-protein phosphatase S (R-PTP-S) (EC 3.1.3.48) (Chick receptor tyrosine phosphatase alpha) (CRYP alpha) (CRYPalpha)	0	47.4472	604.749	XP_031551582	receptor-type tyrosine-protein phosphatase delta isoform X25	0	45.88	660.218	Protein tyrosine phosphatase, receptor type S	2.7e-155	557.4	EC:3.1.3.48	0	0	0	Cell membrane	Membrane	OTHER	0.002533
Res_016195-T3	Hemostasis impairing toxins	2193	Q593B6	Coagulation factor V [Cleaved into: Coagulation factor V heavy chain; Coagulation factor V light chain]	1.22e-24	48.048	108.997	F1NWE3	Receptor-type tyrosine-protein phosphatase S (R-PTP-S) (EC 3.1.3.48) (Chick receptor tyrosine phosphatase alpha) (CRYP alpha) (CRYPalpha)	0	47.4472	604.364	XP_031551582	receptor-type tyrosine-protein phosphatase delta isoform X25	0	45.6665	661.374	Protein tyrosine phosphatase, receptor type S	3e-155	557.4	EC:3.1.3.48	0	0	0	Cell membrane	Membrane	SP(Sec/SPI)	0.975912
Res_016374-T1	Other toxins	640	Q8AY75	Calglandulin	3.26e-11	48.951	58.151	Q6DCF6	EF-hand calcium-binding domain-containing protein 7	1.85e-104	54.2208	332.798	XP_031558355	EF-hand calcium-binding domain-containing protein 7-like	1.90238e-145	62.697	444.891	EF-hand calcium binding domain 7	6.2e-117	428.3	0	7	P:GO:1903569; C:GO:0019898; C:GO:0005623; C:GO:0060170; P:GO:0042307; C:GO:0098797; P:GO:0045944	C:obsolete cell; C:ciliary membrane; C:extrinsic component of membrane; P:positive regulation of protein import into nucleus; P:positive regulation of protein localization to ciliary membrane; C:plasma membrane protein complex; P:positive regulation of transcription by RNA polymerase II	Nucleus	Soluble	OTHER	0.000836
Res_016396-T1	Hemostasis impairing toxins	980	Q58L90	Venom prothrombin activator omicarin-C non-catalytic subunit (vPA) (Venom coagulation factor Va-like protein) [Cleaved into: Omicarin-C non-catalytic subunit heavy chain; Omicarin-C non-catalytic subunit light chain]	6.03e-20	44.3077	92.0485	P12263	Coagulation factor VIII (Procoagulant component)	7.64e-30	46.6077	132.109	XP_031548830	coagulation factor V-like	7.35732e-43	43.7018	181.8	Coagulation factor 5/8 C-terminal domain, discoidin domain	1.7e-33	151.8	0	0	0	0	Cytoplasm	Soluble	SP(Sec/SPI)	0.561067
Res_016658-T1	Hemostasis impairing toxins	1734	Q58L91	Venom prothrombin activator oscutarin-C non-catalytic subunit (vPA) (Venom coagulation factor Va-like protein) [Cleaved into: Oscutarin-C non-catalytic subunit heavy chain; Oscutarin-C non-catalytic subunit light chain]	1.77e-32	49.6894	134.42	B7ZCC9	Adhesion G-protein coupled receptor G4 (G-protein coupled receptor 112)	1.43e-63	52.1519	244.588	XP_020896215	adhesion G protein-coupled receptor L3-like isoform X1	0	54.2205	858.596	protein tyrosine phosphatase activity	1.3e-174	621.3	0	0	0	0	Cell membrane	Membrane	SP(Sec/SPI)	0.979792
Res_016729-T1	Proteases	346	Q9PT51	Beta-fibrinogenase brevinase (EC 3.4.21.-) (Snake venom serine protease) (SVSP) [Cleaved into: Beta-fibrinogenase brevinase chain A; Beta-fibrinogenase brevinase chain B]	6.88e-23	44.5736	92.0485	P00746	Complement factor D (EC 3.4.21.46) (Adipsin) (C3 convertase activator) (Properdin factor D)	2.04e-25	45.3287	105.916	RMC12365	chymotrypsinogen B-like	1.63371e-25	50.1887	116.316	Trypsin-like serine protease	2.6e-21	109.8	0	0	0	0	Extracellular	Soluble	OTHER	0.005741
Res_017004-T1	Other toxins	322	J3S9D9	Reticulocalbin-2 (Taipoxin-associated calcium-binding protein 49 homolog)	2.95e-66	64.0288	207.223	O43852	Calumenin (Crocalbin) (IEF SSP 9302)	2.23e-120	75.6329	351.673	XP_002167284	calumenin isoform X1	1.45288e-131	79.9363	386.726	Calumenin b	1.2e-81	310.1	0	9	P:GO:0009047; P:GO:0006265; C:GO:0005623; C:GO:0005634; P:GO:0045893; P:GO:2000373; C:GO:0005703; C:GO:0005737; P:GO:0006325	P:chromatin organization; C:polytene chromosome puff; C:obsolete cell; P:DNA topological change; P:positive regulation of DNA topoisomerase (ATP-hydrolyzing) activity; C:cytoplasm; C:nucleus; P:dosage compensation by hyperactivation of X chromosome; P:positive regulation of transcription, DNA-templated	Endoplasmic reticulum	Soluble	SP(Sec/SPI)	0.988321
Res_017173-T1	Hemostasis impairing toxins	491	A7X3Z7	C-type lectin lectoxin-Lio2 (CTL)	6e-12	49.4845	60.077	P49013	Fibropellin-3 (Epidermal growth factor-related protein 3) (Fibropellin III) (Fibropellin-c) (SpEGF III)	4.14e-38	66.2252	149.828	XP_032224792	neurogenic locus Notch protein	1.38934e-53	48.046	196.823	carbohydrate binding	4.7e-24	119.4	0	14	F:GO:0004888; F:GO:0005537; P:GO:0007165; P:GO:0071353; F:GO:0038024; P:GO:0006898; C:GO:0009986; C:GO:0010008; P:GO:0071346; P:GO:0071222; C:GO:0005623; C:GO:0005887; P:GO:0098657; P:GO:0051704	C:integral component of plasma membrane; C:endosome membrane; P:signal transduction; P:import into cell; F:transmembrane signaling receptor activity; P:receptor-mediated endocytosis; P:cellular response to lipopolysaccharide; P:cellular response to interleukin-4; F:cargo receptor activity; P:cellular response to interferon-gamma; F:mannose binding; C:cell surface; P:multi-organism process; C:obso…	Cell membrane	Membrane	SP(Sec/SPI)	0.940305
Res_017223-T1	Other toxins	302	J3S9D9	Reticulocalbin-2 (Taipoxin-associated calcium-binding protein 49 homolog)	3.42e-43	56.7164	146.747	Q6XLQ7	Calumenin	3.41e-58	58.2734	192.2	XP_020906974, KXJ10711	calumenin isoform X1	1.07645e-90	67.3401	281.567	calcium ion binding	3.2e-55	222.2	0	0	0	0	Endoplasmic reticulum	Soluble	OTHER	0.405676
Res_017296-T1	Hemostasis impairing toxins	3440	Q58L90	Venom prothrombin activator omicarin-C non-catalytic subunit (vPA) (Venom coagulation factor Va-like protein) [Cleaved into: Omicarin-C non-catalytic subunit heavy chain; Omicarin-C non-catalytic subunit light chain]	1.67e-13	41.2121	73.1738	P70490	Lactadherin (MFGM) (Milk fat globule-EGF factor 8) (MFG-E8) (O-acetyl GD3 ganglioside synthase) (AGS) (SED1)	2.36e-22	48.5893	106.686	XP_028518026	EGF-like repeat and discoidin I-like domain-containing protein 3	4.59512e-30	43.595	145.591	Belongs to the G-protein coupled receptor 2 family	4.6e-25	125.6	0	0	0	0	Lysosome/Vacuole	Membrane	SP(Sec/SPI)	0.836644
Res_017429-T1	Phospholipases	155	P80003	Acidic phospholipase A2 PA4 (PLA2) (EC 3.1.1.4) (Phosphatidylcholine 2-acylhydrolase) [Cleaved into: Acidic phospholipase A2 PA2]	4.08e-30	61.2245	103.219	Q9NZ20	Group 3 secretory phospholipase A2 (EC 3.1.1.4) (Group III secretory phospholipase A2) (GIII sPLA2) (sPLA2-III) (Phosphatidylcholine 2-acylhydrolase 3)	5.31e-28	59.0476	110.923	AOT85611, AOT85613	protein PROCA1	1.00691e-40	67.3611	144.05	Phospholipase A2, group III	1.5e-24	119.4	EC:3.1.1.4	11	P:GO:0060271; P:GO:0036151; P:GO:0036152; C:GO:0005886; C:GO:0005623; C:GO:0005615; P:GO:0036148; C:GO:0005737; C:GO:0005814; F:GO:0047498; P:GO:0097164	C:centriole; C:extracellular space; C:obsolete cell; P:phosphatidylcholine acyl-chain remodeling; F:calcium-dependent phospholipase A2 activity; C:cytoplasm; P:phosphatidylglycerol acyl-chain remodeling; P:cilium assembly; P:ammonium ion metabolic process; P:phosphatidylethanolamine acyl-chain remodeling; C:plasma membrane	Extracellular	Soluble	SP(Sec/SPI)	0.939352
Res_017504-T1	Proteases	774	B2D0J4	Venom dipeptidyl peptidase 4 (Allergen C) (Venom dipeptidyl peptidase IV) (EC 3.4.14.5) (allergen Api m 5)	2.93e-122	50.7736	381.719	P97321	Prolyl endopeptidase FAP (EC 3.4.21.26) (Dipeptidyl peptidase FAP) (EC 3.4.14.5) (Fibroblast activation protein alpha) (FAPalpha) (Gelatine degradation protease FAP) (EC 3.4.21.-) (Integral membrane serine protease) (Post-proline cleaving enzyme) (Serine integral membrane protease) (SIMP) (Surface-expressed protease) (Seprase) [Cleaved into: Antiplasmin-cleaving enzyme FAP, soluble form (APCE) (E…	2.09e-138	54.083	429.869	XP_012555155	dipeptidyl peptidase 4-like isoform X2	0	64.9123	699.123	negative regulation of extracellular matrix disassembly	2.2e-193	682.6	EC:3.4.14.5	44	C:GO:0016021; P:GO:0033632; P:GO:0010716; F:GO:0008239; C:GO:0071438; P:GO:0031295; P:GO:0001666; P:GO:0001662; C:GO:0005794; P:GO:0071158; P:GO:0097325; P:GO:0071850; P:GO:0036343; C:GO:0030139; F:GO:0004252; P:GO:0008284; F:GO:0042277; C:GO:0005615; C:GO:0016324; P:GO:0050796; P:GO:0051704; P:GO:0010710; P:GO:0051603; F:GO:0004222; P:GO:0060244; C:GO:0046581; P:GO:0046718; P:GO:1900119; F:GO:00…	C:extracellular space; P:response to hypoxia; F:integrin binding; P:regulation of cell-cell adhesion mediated by integrin; F:dipeptidyl-peptidase activity; P:regulation of T cell mediated immunity; P:psychomotor behavior; P:proteolysis involved in cellular protein catabolic process; P:behavioral fear response; P:multi-organism process; P:negative regulation of extracellular matrix disassembly; P:…	Cell membrane	Membrane	OTHER	0.003018
Res_017504-T2	Proteases	821	B2D0J4	Venom dipeptidyl peptidase 4 (Allergen C) (Venom dipeptidyl peptidase IV) (EC 3.4.14.5) (allergen Api m 5)	1.56e-125	50.8772	391.734	P97321	Prolyl endopeptidase FAP (EC 3.4.21.26) (Dipeptidyl peptidase FAP) (EC 3.4.14.5) (Fibroblast activation protein alpha) (FAPalpha) (Gelatine degradation protease FAP) (EC 3.4.21.-) (Integral membrane serine protease) (Post-proline cleaving enzyme) (Serine integral membrane protease) (SIMP) (Surface-expressed protease) (Seprase) [Cleaved into: Antiplasmin-cleaving enzyme FAP, soluble form (APCE) (E…	1.76e-146	53.7772	452.21	XP_012555155	dipeptidyl peptidase 4-like isoform X2	0	64.295	723.776	negative regulation of extracellular matrix disassembly	1.6e-197	696.4	EC:3.4.14.5	44	C:GO:0016021; P:GO:0033632; P:GO:0010716; F:GO:0008239; C:GO:0071438; P:GO:0031295; P:GO:0001666; P:GO:0001662; C:GO:0005794; P:GO:0071158; P:GO:0097325; P:GO:0071850; P:GO:0036343; C:GO:0030139; F:GO:0004252; P:GO:0008284; F:GO:0042277; C:GO:0005615; C:GO:0016324; P:GO:0050796; P:GO:0051704; P:GO:0010710; P:GO:0051603; F:GO:0004222; P:GO:0060244; C:GO:0046581; P:GO:0046718; P:GO:1900119; F:GO:00…	C:extracellular space; P:response to hypoxia; F:integrin binding; P:regulation of cell-cell adhesion mediated by integrin; F:dipeptidyl-peptidase activity; P:regulation of T cell mediated immunity; P:psychomotor behavior; P:proteolysis involved in cellular protein catabolic process; P:behavioral fear response; P:multi-organism process; P:negative regulation of extracellular matrix disassembly; P:…	Lysosome/Vacuole	Membrane	OTHER	0.005665
Res_017504-T3	Proteases	823	B2D0J4	Venom dipeptidyl peptidase 4 (Allergen C) (Venom dipeptidyl peptidase IV) (EC 3.4.14.5) (allergen Api m 5)	1.45e-124	50.2717	389.423	P97321	Prolyl endopeptidase FAP (EC 3.4.21.26) (Dipeptidyl peptidase FAP) (EC 3.4.14.5) (Fibroblast activation protein alpha) (FAPalpha) (Gelatine degradation protease FAP) (EC 3.4.21.-) (Integral membrane serine protease) (Post-proline cleaving enzyme) (Serine integral membrane protease) (SIMP) (Surface-expressed protease) (Seprase) [Cleaved into: Antiplasmin-cleaving enzyme FAP, soluble form (APCE) (E…	1.07e-145	53.9052	450.284	XP_012555155	prolyl endopeptidase FAP-like isoform X1	0	64.3411	721.465	negative regulation of extracellular matrix disassembly	1.7e-196	693	EC:3.4.14.5	44	C:GO:0016021; P:GO:0033632; P:GO:0010716; F:GO:0008239; C:GO:0071438; P:GO:0031295; P:GO:0001666; P:GO:0001662; C:GO:0005794; P:GO:0071158; P:GO:0097325; P:GO:0071850; P:GO:0036343; C:GO:0030139; F:GO:0004252; P:GO:0008284; F:GO:0042277; C:GO:0005615; C:GO:0016324; P:GO:0050796; P:GO:0051704; P:GO:0010710; P:GO:0051603; F:GO:0004222; P:GO:0060244; C:GO:0046581; P:GO:0046718; P:GO:1900119; F:GO:00…	C:extracellular space; P:response to hypoxia; F:integrin binding; P:regulation of cell-cell adhesion mediated by integrin; F:dipeptidyl-peptidase activity; P:regulation of T cell mediated immunity; P:psychomotor behavior; P:proteolysis involved in cellular protein catabolic process; P:behavioral fear response; P:multi-organism process; P:negative regulation of extracellular matrix disassembly; P:…	Lysosome/Vacuole	Membrane	OTHER	0.005665
Res_017539-T1	Hemostasis impairing toxins	576	D8VNS8	Ryncolin-2	2.62e-63	68.2292	208.379	A2AV25	Fibrinogen C domain-containing protein 1	8.4e-62	62.7273	214.157	XP_029193688	hemicentin-1-like isoform X1	8.84443e-96	59.0206	317.005	Fibrinogen beta and gamma chains, C-terminal globular domain	1.1e-59	238	0	0	0	0	Extracellular	Soluble	OTHER	0.189536
Res_017551-T1	Hemostasis impairing toxins	1104	Q593B6	Coagulation factor V [Cleaved into: Coagulation factor V heavy chain; Coagulation factor V light chain]	5.86e-128	52.8571	421.779	B3EWZ9	Hephaestin-like protein (EC 1.-.-.-)	0	64.9327	1112.44	XP_020906986	hephaestin-like protein	0	68.0987	1143.26	oxidoreductase activity, oxidizing metal ions, oxygen as acceptor	6.5e-308	1063.5	EC:1.16.3.1	20	P:GO:0055114; P:GO:0007584; F:GO:0004322; C:GO:0046658; P:GO:0006826; P:GO:0006879; F:GO:0005507; P:GO:0007568; F:GO:0051087; P:GO:0046688; P:GO:0043687; P:GO:0001889; C:GO:0048471; C:GO:0005623; C:GO:0005788; P:GO:0015679; C:GO:0005615; C:GO:0016323; F:GO:0008198; P:GO:0030324	P:aging; C:anchored component of plasma membrane; P:iron ion transport; C:endoplasmic reticulum lumen; P:liver development; F:ferrous iron binding; C:extracellular space; P:oxidation-reduction process; P:plasma membrane copper ion transport; C:perinuclear region of cytoplasm; F:chaperone binding; P:lung development; F:copper ion binding; C:basolateral plasma membrane; F:ferroxidase activity; P:po…	Extracellular	Soluble	SP(Sec/SPI)	0.917934

## Sheet: Table S2_Predicted_Toxin_S. ma
			BLASTp (Tox-Prot)					BLASTp (Uniprot)					BLASTp (nr)					eggNOG mapper							DeepLoc		SignalP
Sequence name	Toxin Family	Sequence length	Hit ACC	Sequence desc.	E-Value	Similarity	Bit-Score	Hit ACC	Sequence desc.	E-Value	Similarity	Bit-Score	Hit ACC	Sequence desc.	E-Value	Similarity	Bit-Score	EggNOG Description	E-Value	Bit-Score	EC Codes	#GO	GOs	GO Names	Localization	Type	Prediction	SP(Sec/SPI)
Sma_001282-T1	Hemostasis impairing toxins	492	Q7SZN0	Venom prothrombin activator pseutarin-C non-catalytic subunit (PCNS) (vPA) (Venom coagulation factor Va-like protein) [Cleaved into: Pseutarin-C non-catalytic subunit heavy chain; Pseutarin-C non-catalytic subunit light chain]	2.63e-25	45.7143	106.301	O43854	EGF-like repeat and discoidin I-like domain-containing protein 3 (Developmentally-regulated endothelial cell locus 1 protein) (Integrin-binding protein DEL1)	2.15e-24	42.4084	108.997	XP_002588311	EGF-like repeat and discoidin I-like domain-containing protein 3	2.0176e-33	54.4554	139.043	phosphatidylethanolamine binding	5.2e-31	142.5	0	17	F:GO:0008429; C:GO:0019897; F:GO:0001786; P:GO:0045807; P:GO:0043627; P:GO:0006910; P:GO:0006911; C:GO:0009897; P:GO:0043687; P:GO:0043277; C:GO:0005623; C:GO:0005788; P:GO:0098657; P:GO:0008284; F:GO:0005178; C:GO:0005615; P:GO:0050766	C:endoplasmic reticulum lumen; F:phosphatidylserine binding; C:extracellular space; C:external side of plasma membrane; P:response to estrogen; P:positive regulation of cell population proliferation; P:import into cell; F:integrin binding; P:positive regulation of endocytosis; P:positive regulation of phagocytosis; P:apoptotic cell clearance; C:extrinsic component of plasma membrane; P:post-trans…	Extracellular	Soluble	SP(Sec/SPI)	0.994606
Sma_001286-T1	Hemostasis impairing toxins	246	Q58L91	Venom prothrombin activator oscutarin-C non-catalytic subunit (vPA) (Venom coagulation factor Va-like protein) [Cleaved into: Oscutarin-C non-catalytic subunit heavy chain; Oscutarin-C non-catalytic subunit light chain]	6.13e-14	42.9134	67.3958	P28824	Neuropilin-1 (A5 antigen) (A5 protein)	5.27e-15	44.6903	77.411	XP_028417633	predicted protein	2.84199e-21	47.5	103.605	coagulation factor V	2.6e-15	89.4	0	13	P:GO:0008015; P:GO:0007596; P:GO:0002576; P:GO:0048208; C:GO:0005794; C:GO:0030134; C:GO:0033116; P:GO:0043687; C:GO:0005886; C:GO:0005623; C:GO:0005788; C:GO:0031093; C:GO:0005615	C:endoplasmic reticulum lumen; P:platelet degranulation; C:extracellular space; C:platelet alpha granule lumen; P:blood circulation; P:COPII vesicle coating; C:plasma membrane; C:endoplasmic reticulum-Golgi intermediate compartment membrane; P:blood coagulation; P:post-translational protein modification; C:obsolete cell; C:COPII-coated ER to Golgi transport vesicle; C:Golgi apparatus	Extracellular	Soluble	OTHER	0.039751
Sma_001287-T1	Hemostasis impairing toxins	1744	Q593B6	Coagulation factor V [Cleaved into: Coagulation factor V heavy chain; Coagulation factor V light chain]	4.82e-26	46.3855	113.235	O35474	EGF-like repeat and discoidin I-like domain-containing protein 3 (Developmentally-regulated endothelial cell locus 1 protein) (Integrin-binding protein DEL1)	7.26e-33	45.3431	138.272	PFX30425	Neurogenic locus Notch protein	1.56868e-80	40.2083	308.916	Coagulation factor 5/8 C-terminal domain, discoidin domain	5.4e-46	194.1	0	0	0	0	Cytoplasm	Soluble	OTHER	0.000635
Sma_001442-T1	Proteases	207	K7Z9Q9	Nematocyst expressed protein 6 (NEP-6) (EC 3.4.24.-) (Astacin-like metalloprotease toxin)	3.1e-21	59.322	85.5001	P55115	Zinc metalloproteinase nas-15 (EC 3.4.24.-) (Nematode astacin 15)	1.4e-24	64.9123	103.605	XP_020914254	zinc metalloproteinase nas-6-like	1.87934e-78	72.5118	250.366	Astacin (Peptidase family M12A)	2.1e-58	232.3	0	0	0	0	Extracellular	Soluble	OTHER	0.002644
Sma_001519-T1	Hemostasis impairing toxins	643	Q593B6	Coagulation factor V [Cleaved into: Coagulation factor V heavy chain; Coagulation factor V light chain]	1.63e-36	51.5625	143.28	Q08431	Lactadherin (Breast epithelial antigen BA46) (HMFG) (MFGM) (Milk fat globule-EGF factor 8) (MFG-E8) (SED1) [Cleaved into: Lactadherin short form; Medin]	3.47e-41	50.8671	157.532	XP_001636742, EDO44679	predicted protein	1.1479e-131	55.0232	411.764	phosphatidylethanolamine binding	3e-111	409.5	0	0	0	0	Extracellular	Soluble	SP(Sec/SPI)	0.948108
Sma_001585-T1	Hemostasis impairing toxins	619	D8VNT0	Ryncolin-4	5.83e-33	53.2995	125.946	P22105	Tenascin-X (TN-X) (Hexabrachion-like protein)	1.82e-35	54.6256	147.132	XP_012556814	GTP-binding protein YPT1-like	1.95937e-44	62.5641	170.244	GTPase activity	1e-39	171.8	0	0	0	0	Extracellular	Soluble	OTHER	0.000239
Sma_001677-T1	Hemostasis impairing toxins	1356	Q4QXT9	Coagulation factor X (EC 3.4.21.6) [Cleaved into: Factor X light chain; Factor X heavy chain; Activated factor Xa heavy chain]	3.86e-26	54.9451	110.153	O75581	Low-density lipoprotein receptor-related protein 6 (LRP-6)	9.16e-48	52.8358	191.43	XP_028512854, XP_028512855	low-density lipoprotein receptor-related protein 6-like isoform X2	0	51.5789	750.355	cell adhesion	2.8e-58	234.6	0	0	0	0	Extracellular	Soluble	SP(Sec/SPI)	0.977926
Sma_001683-T1	Phospholipases	171	Q7M4I5	Phospholipase A2 (PLA2) (EC 3.1.1.4) (Phosphatidylcholine 2-acylhydrolase) (allergen Api d 1)	1.04e-22	61.8644	84.7297	Q7M4I5	Phospholipase A2 (PLA2) (EC 3.1.1.4) (Phosphatidylcholine 2-acylhydrolase) (allergen Api d 1)	2.47e-20	61.8644	84.7297	AOT85612, AOT85614	phospholipase A2 isozymes PA3A/PA3B/PA5-like	3.08523e-34	59.1241	128.257	Phospholipase A2	7.1e-20	104	EC:3.1.1.4	0	0	0	Extracellular	Soluble	SP(Sec/SPI)	0.998437
Sma_004064-T1	Hemostasis impairing toxins	541	D8VNS8	Ryncolin-2	6.14e-60	63.3803	198.749	O70165	Ficolin-1 (Collagen/fibrinogen domain-containing protein 1) (Ficolin-A) (Ficolin-alpha) (M-ficolin)	6.37e-68	65.5502	225.328	KXJ29631	angiopoietin-related protein 7	2.37745e-96	57.1788	309.686	mesenchymal-epithelial cell signaling involved in prostate gland development	2.3e-64	253.4	0	16	P:GO:0060739; P:GO:0010628; P:GO:0030198; P:GO:0060740; P:GO:0007528; P:GO:0060447; F:GO:0001968; P:GO:0043687; P:GO:0014012; C:GO:0005623; C:GO:0005788; P:GO:0007162; P:GO:0008284; C:GO:0005614; F:GO:0045545; C:GO:0005604	P:prostate gland epithelium morphogenesis; C:interstitial matrix; P:mesenchymal-epithelial cell signaling involved in prostate gland development; C:basement membrane; C:endoplasmic reticulum lumen; P:negative regulation of cell adhesion; P:positive regulation of cell population proliferation; F:syndecan binding; P:bud outgrowth involved in lung branching; P:extracellular matrix organization; P:po…	Extracellular	Soluble	OTHER	0.000438
Sma_004066-T1	Hemostasis impairing toxins	586	D8VNS8	Ryncolin-2	2.77e-57	62.4413	192.586	O70165	Ficolin-1 (Collagen/fibrinogen domain-containing protein 1) (Ficolin-A) (Ficolin-alpha) (M-ficolin)	4.35e-66	65.0718	221.861	XP_015767635	angiopoietin-related protein 7	4.42252e-98	53.252	339.347	mesenchymal-epithelial cell signaling involved in prostate gland development	2.5e-56	226.9	0	16	P:GO:0060739; P:GO:0010628; P:GO:0030198; P:GO:0060740; P:GO:0007528; P:GO:0060447; F:GO:0001968; P:GO:0043687; P:GO:0014012; C:GO:0005623; C:GO:0005788; P:GO:0007162; P:GO:0008284; C:GO:0005614; F:GO:0045545; C:GO:0005604	P:prostate gland epithelium morphogenesis; C:interstitial matrix; P:mesenchymal-epithelial cell signaling involved in prostate gland development; C:basement membrane; C:endoplasmic reticulum lumen; P:negative regulation of cell adhesion; P:positive regulation of cell population proliferation; F:syndecan binding; P:bud outgrowth involved in lung branching; P:extracellular matrix organization; P:po…	Extracellular	Soluble	OTHER	0.001948
Sma_004067-T1	Hemostasis impairing toxins	508	D8VNT0	Ryncolin-4	3.66e-61	62.2727	201.06	P57756	Ficolin-2 (Collagen/fibrinogen domain-containing protein 2) (Ficolin-B) (Ficolin-beta) (L-ficolin)	1.95e-65	66.0287	217.624	XP_020622044	angiopoietin-related protein 7	3.9573e-99	57.3494	323.168	mesenchymal-epithelial cell signaling involved in prostate gland development	1.3e-64	254.2	0	16	P:GO:0060739; P:GO:0010628; P:GO:0030198; P:GO:0060740; P:GO:0007528; P:GO:0060447; F:GO:0001968; P:GO:0043687; P:GO:0014012; C:GO:0005623; C:GO:0005788; P:GO:0007162; P:GO:0008284; C:GO:0005614; F:GO:0045545; C:GO:0005604	P:prostate gland epithelium morphogenesis; C:interstitial matrix; P:mesenchymal-epithelial cell signaling involved in prostate gland development; C:basement membrane; C:endoplasmic reticulum lumen; P:negative regulation of cell adhesion; P:positive regulation of cell population proliferation; F:syndecan binding; P:bud outgrowth involved in lung branching; P:extracellular matrix organization; P:po…	Extracellular	Soluble	OTHER	0.002793
Sma_004072-T1	Hemostasis impairing toxins	522	E2IYB3	Veficolin-1 (Fragment)	2.68e-32	64.8148	119.783	Q29041	Ficolin-2 (Collagen/fibrinogen domain-containing protein 2) (Ficolin-B) (Ficolin-beta) (L-ficolin)	8.15e-32	65.0794	127.872	XP_015767635	fibrinogen alpha chain-like	1.40627e-66	50.9091	245.358	signaling receptor binding	1.3e-27	131.3	0	0	0	0	Extracellular	Soluble	OTHER	0.003255
Sma_004074-T1	Hemostasis impairing toxins	257	D8VNS8	Ryncolin-2	7.05e-58	63.7209	184.496	O70165	Ficolin-1 (Collagen/fibrinogen domain-containing protein 1) (Ficolin-A) (Ficolin-alpha) (M-ficolin)	5.56e-64	63.981	206.068	KXJ18681	angiopoietin-related protein 7	6.65287e-78	67.4603	256.144	mesenchymal-epithelial cell signaling involved in prostate gland development	3e-62	245.4	0	16	P:GO:0060739; P:GO:0010628; P:GO:0030198; P:GO:0060740; P:GO:0007528; P:GO:0060447; F:GO:0001968; P:GO:0043687; P:GO:0014012; C:GO:0005623; C:GO:0005788; P:GO:0007162; P:GO:0008284; C:GO:0005614; F:GO:0045545; C:GO:0005604	P:prostate gland epithelium morphogenesis; C:interstitial matrix; P:mesenchymal-epithelial cell signaling involved in prostate gland development; C:basement membrane; C:endoplasmic reticulum lumen; P:negative regulation of cell adhesion; P:positive regulation of cell population proliferation; F:syndecan binding; P:bud outgrowth involved in lung branching; P:extracellular matrix organization; P:po…	Extracellular	Soluble	OTHER	0.000496
Sma_004075-T1	Hemostasis impairing toxins	607	D8VNS8	Ryncolin-2	5.27e-60	64.1026	200.29	Q29041	Ficolin-2 (Collagen/fibrinogen domain-containing protein 2) (Ficolin-B) (Ficolin-beta) (L-ficolin)	5.44e-63	67.0103	213.772	XP_015767635	angiopoietin-related protein 7	3.74671e-95	53.9301	331.643	mesenchymal-epithelial cell signaling involved in prostate gland development	6.2e-58	232.3	0	16	P:GO:0060739; P:GO:0010628; P:GO:0030198; P:GO:0060740; P:GO:0007528; P:GO:0060447; F:GO:0001968; P:GO:0043687; P:GO:0014012; C:GO:0005623; C:GO:0005788; P:GO:0007162; P:GO:0008284; C:GO:0005614; F:GO:0045545; C:GO:0005604	P:prostate gland epithelium morphogenesis; C:interstitial matrix; P:mesenchymal-epithelial cell signaling involved in prostate gland development; C:basement membrane; C:endoplasmic reticulum lumen; P:negative regulation of cell adhesion; P:positive regulation of cell population proliferation; F:syndecan binding; P:bud outgrowth involved in lung branching; P:extracellular matrix organization; P:po…	Extracellular	Soluble	OTHER	0.001983
Sma_004076-T1	Hemostasis impairing toxins	495	D8VNS8	Ryncolin-2	2.44e-61	63.8498	201.06	Q29041	Ficolin-2 (Collagen/fibrinogen domain-containing protein 2) (Ficolin-B) (Ficolin-beta) (L-ficolin)	1.81e-65	64.1148	217.238	XP_020622044	angiopoietin-related protein 7	8.67548e-102	59.8015	329.717	mesenchymal-epithelial cell signaling involved in prostate gland development	1.2e-64	254.2	0	16	P:GO:0060739; P:GO:0010628; P:GO:0030198; P:GO:0060740; P:GO:0007528; P:GO:0060447; F:GO:0001968; P:GO:0043687; P:GO:0014012; C:GO:0005623; C:GO:0005788; P:GO:0007162; P:GO:0008284; C:GO:0005614; F:GO:0045545; C:GO:0005604	P:prostate gland epithelium morphogenesis; C:interstitial matrix; P:mesenchymal-epithelial cell signaling involved in prostate gland development; C:basement membrane; C:endoplasmic reticulum lumen; P:negative regulation of cell adhesion; P:positive regulation of cell population proliferation; F:syndecan binding; P:bud outgrowth involved in lung branching; P:extracellular matrix organization; P:po…	Extracellular	Soluble	OTHER	0.002793
Sma_005207-T1	Cysteine-rich Proteins	898	Q2XXQ5	Cysteine-rich venom protein DIS2 (CRVP) (Cysteine-rich secretory protein DIS2) (CRISP-DIS2)	1.03e-12	47.1014	65.0846	B3EWZ6	MAM and LDL-receptor class A domain-containing protein 2 (Skeletal organic matrix MAM and LDL-receptor 2) (SOM MAM and LDL-receptor 2) (Fragment)	4.81e-38	47.2019	158.688	XP_029214254, XP_029214255	Golgi-associated plant pathogenesis-related protein 1-like	3.10289e-44	65.896	186.037	calcium ion binding	6.8e-37	162.9	0	0	0	0	Cell membrane	Membrane	OTHER	0.00136
Sma_005340-T1	Hemostasis impairing toxins	629	Q58L90	Venom prothrombin activator omicarin-C non-catalytic subunit (vPA) (Venom coagulation factor Va-like protein) [Cleaved into: Omicarin-C non-catalytic subunit heavy chain; Omicarin-C non-catalytic subunit light chain]	4.42e-13	44.0594	68.5514	Q62371	Discoidin domain-containing receptor 2 (Discoidin domain receptor 2) (EC 2.7.10.1) (CD167 antigen-like family member B) (Neurotrophic tyrosine kinase, receptor-related 3) (Receptor protein-tyrosine kinase TKT) (Tyrosine-protein kinase TYRO10) (CD antigen CD167b)	3.55e-37	45.2607	151.754	XP_012556428	discoidin domain-containing receptor 2-like	2.6419e-63	48.0952	226.098	Discoidin domain receptor family, member 2, like	2.2e-34	154.1	EC:2.7.10.1	14	F:GO:0004713; F:GO:0070492; F:GO:0005515; P:GO:0008045; P:GO:0097376; F:GO:0005518; P:GO:0038063; C:GO:0005886; C:GO:0030424; C:GO:0005623; C:GO:0005912; C:GO:0005925; P:GO:0048680; P:GO:0018108	F:protein tyrosine kinase activity; P:collagen-activated tyrosine kinase receptor signaling pathway; F:oligosaccharide binding; P:peptidyl-tyrosine phosphorylation; C:plasma membrane; C:adherens junction; P:motor neuron axon guidance; C:focal adhesion; C:obsolete cell; F:protein binding; P:positive regulation of axon regeneration; P:interneuron axon guidance; C:axon; F:collagen binding	Cell membrane	Membrane	OTHER	0.417325
Sma_005605-T1	Hemostasis impairing toxins	2614	Q593B6	Coagulation factor V [Cleaved into: Coagulation factor V heavy chain; Coagulation factor V light chain]	2.46e-39	51.1111	157.532	P22897	Macrophage mannose receptor 1 (MMR) (C-type lectin domain family 13 member D) (C-type lectin domain family 13 member D-like) (Human mannose receptor) (hMR) (Macrophage mannose receptor 1-like protein 1) (CD antigen CD206)	1.82e-52	41.3233	208.379	XP_032222764	macrophage mannose receptor 1-like	0	45.1499	658.677	carbohydrate binding	0	1162.9	0	14	F:GO:0004888; F:GO:0005537; P:GO:0007165; P:GO:0071353; F:GO:0038024; P:GO:0006898; C:GO:0009986; C:GO:0010008; P:GO:0071346; P:GO:0071222; C:GO:0005623; C:GO:0005887; P:GO:0098657; P:GO:0051704	C:integral component of plasma membrane; C:endosome membrane; P:signal transduction; P:import into cell; F:transmembrane signaling receptor activity; P:receptor-mediated endocytosis; P:cellular response to lipopolysaccharide; P:cellular response to interleukin-4; F:cargo receptor activity; P:cellular response to interferon-gamma; F:mannose binding; C:cell surface; P:multi-organism process; C:obso…	Cell membrane	Membrane	OTHER	0.003161
Sma_005698-T1	Cysteine-rich Proteins	258	Q3SB06	Cysteine-rich venom protein pseudechetoxin-like (CRVP) (Cysteine-rich secretory protein OXY1) (CRISP-OXY1)	1.21e-16	46.4052	73.1738	Q9H4G4	Golgi-associated plant pathogenesis-related protein 1 (GAPR-1) (Golgi-associated PR-1 protein) (Glioma pathogenesis-related protein 2) (GliPR 2)	1.45e-38	63.9456	134.806	XP_004211747	golgi-associated plant pathogenesis-related protein 1-like	3.41347e-64	70.9677	214.157	positive regulation of epithelial to mesenchymal transition	2.4e-51	209.1	0	7	P:GO:0010634; C:GO:0000139; F:GO:0042803; C:GO:0098791; P:GO:0010718; C:GO:0005623; P:GO:0070374	C:Golgi apparatus subcompartment; F:protein homodimerization activity; P:positive regulation of epithelial to mesenchymal transition; C:obsolete cell; P:positive regulation of ERK1 and ERK2 cascade; C:Golgi membrane; P:positive regulation of epithelial cell migration	Extracellular	Soluble	OTHER	0.000376
Sma_005700-T1	Cysteine-rich Proteins	232	A6MFK9	Cysteine-rich venom protein (CRVP) (Cysteine-rich secretory protein) (CRISP)	3.05e-12	45.8333	60.4622	Q9H4G4	Golgi-associated plant pathogenesis-related protein 1 (GAPR-1) (Golgi-associated PR-1 protein) (Glioma pathogenesis-related protein 2) (GliPR 2)	1.86e-25	54.4218	100.138	XP_015774412, XP_015774413, XP_015774414, XP_015774415	Golgi-associated plant pathogenesis-related protein 1-like	1.29437e-50	66.0714	177.948	positive regulation of epithelial to mesenchymal transition	2.9e-40	172.2	0	7	P:GO:0010634; C:GO:0000139; F:GO:0042803; C:GO:0098791; P:GO:0010718; C:GO:0005623; P:GO:0070374	C:Golgi apparatus subcompartment; F:protein homodimerization activity; P:positive regulation of epithelial to mesenchymal transition; C:obsolete cell; P:positive regulation of ERK1 and ERK2 cascade; C:Golgi membrane; P:positive regulation of epithelial cell migration	Extracellular	Soluble	OTHER	0.001333
Sma_005705-T1	Hemostasis impairing toxins	2044	Q7SZN0	Venom prothrombin activator pseutarin-C non-catalytic subunit (PCNS) (vPA) (Venom coagulation factor Va-like protein) [Cleaved into: Pseutarin-C non-catalytic subunit heavy chain; Pseutarin-C non-catalytic subunit light chain]	9.11e-22	57.3864	99.7525	O95490	Adhesion G protein-coupled receptor L2 (Calcium-independent alpha-latrotoxin receptor 2) (CIRL-2) (Latrophilin homolog 1) (Latrophilin-2) (Lectomedin-1)	1.38e-33	43.6293	145.976	XP_012553473	Brain-specific angiogenesis inhibitor 3	1.12667e-154	52.5263	541.576	Immunoglobulin C-2 Type	7.8e-198	698.7	0	0	0	0	Cell membrane	Membrane	OTHER	0.09482
Sma_006080-T1	Other toxins	536	A8QL51	L-amino-acid oxidase (Bm-LAAO) (LAO) (EC 1.4.3.2)	2.49e-18	42.4742	83.9593	P58027	Amine oxidase [flavin-containing] A (EC 1.4.3.4) (Monoamine oxidase type A) (MAO-A)	4.33e-87	53.6178	281.182	XP_022793383, PFX33851	probable flavin-containing monoamine oxidase A	5.98239e-133	63.0342	405.216	Amine oxidase flavin-containing	9.8e-100	370.9	EC:1.4.3.4	0	0	0	Mitochondrion	Membrane	OTHER	0.001585
Sma_006296-T1	Phospholipases	138	P80003	Acidic phospholipase A2 PA4 (PLA2) (EC 3.1.1.4) (Phosphatidylcholine 2-acylhydrolase) [Cleaved into: Acidic phospholipase A2 PA2]	4.09e-31	61.2245	105.145	P80003	Acidic phospholipase A2 PA4 (PLA2) (EC 3.1.1.4) (Phosphatidylcholine 2-acylhydrolase) [Cleaved into: Acidic phospholipase A2 PA2]	9.69e-29	61.2245	105.145	AOT85611, AOT85613	protein PROCA1	3.58352e-52	81.0345	172.17	Protein interacting with cyclin A1	2e-25	122.1	EC:3.1.1.4	0	0	0	Extracellular	Soluble	OTHER	0.00196
Sma_006299-T1	Phospholipases	174	P80003	Acidic phospholipase A2 PA4 (PLA2) (EC 3.1.1.4) (Phosphatidylcholine 2-acylhydrolase) [Cleaved into: Acidic phospholipase A2 PA2]	9.08e-31	61.2245	105.531	P80003	Acidic phospholipase A2 PA4 (PLA2) (EC 3.1.1.4) (Phosphatidylcholine 2-acylhydrolase) [Cleaved into: Acidic phospholipase A2 PA2]	2.15e-28	61.2245	105.531	AOT85611, AOT85613	protein PROCA1	1.77158e-51	81.0345	172.17	Protein interacting with cyclin A1	5.7e-25	120.9	EC:3.1.1.4	0	0	0	Extracellular	Soluble	OTHER	0.001895
Sma_006314-T1	Phospholipases	174	P80003	Acidic phospholipase A2 PA4 (PLA2) (EC 3.1.1.4) (Phosphatidylcholine 2-acylhydrolase) [Cleaved into: Acidic phospholipase A2 PA2]	7.23e-31	61.2245	105.916	P80003	Acidic phospholipase A2 PA4 (PLA2) (EC 3.1.1.4) (Phosphatidylcholine 2-acylhydrolase) [Cleaved into: Acidic phospholipase A2 PA2]	1.71e-28	61.2245	105.916	AOT85611, AOT85613	protein PROCA1	1.8507e-51	81.0345	172.17	Protein interacting with cyclin A1	7.5e-25	120.6	EC:3.1.1.4	0	0	0	Extracellular	Soluble	OTHER	0.001838
Sma_006382-T1	Proteases	423	Q76B45	Blarina toxin (BLTX) (EC 3.4.21.-)	2.1e-41	48.5294	144.821	P22457	Coagulation factor VII (EC 3.4.21.21) (Serum prothrombin conversion accelerator) [Cleaved into: Factor VII light chain; Factor VII heavy chain]	3.02e-50	45.3608	179.104	XP_012557610	chymotrypsin-like protease 1	1.9004e-72	52.9086	242.276	transmembrane protease serine 5	9.6e-58	231.1	0	5	C:GO:0005886; C:GO:0005623; P:GO:0006508; F:GO:0008233; C:GO:0043025	F:peptidase activity; C:neuronal cell body; C:obsolete cell; P:proteolysis; C:plasma membrane	Extracellular	Soluble	OTHER	0.007954
Sma_006382-T2	Hemostasis impairing toxins	347	Q4QXT9	Coagulation factor X (EC 3.4.21.6) [Cleaved into: Factor X light chain; Factor X heavy chain; Activated factor Xa heavy chain]	8.89e-20	43.2526	86.2705	P22457	Coagulation factor VII (EC 3.4.21.21) (Serum prothrombin conversion accelerator) [Cleaved into: Factor VII light chain; Factor VII heavy chain]	2.2e-31	44.2379	125.946	XP_028513255	CUB and peptidase domain-containing protein 2	6.38938e-43	47.8386	170.244	serine-type endopeptidase activity	2e-29	136.7	0	0	0	0	Extracellular	Soluble	OTHER	0.007954
Sma_006382-T3	Hemostasis impairing toxins	255	A6MFK8	Venom prothrombin activator vestarin-D2 (vPA) (EC 3.4.21.6) (Venom coagulation factor Xa-like protease) [Cleaved into: Vestarin-D2 light chain; Vestarin-D2 heavy chain]	8.19e-11	40.5797	57.7658	P16296	Coagulation factor IX (EC 3.4.21.22) (Christmas factor) [Cleaved into: Coagulation factor IXa light chain; Coagulation factor IXa heavy chain]	5.18e-17	42.7386	83.1889	XP_031561358	Hyaluronan-binding protein 2	3.67281e-30	52.6749	129.798	serine-type endopeptidase activity	9.3e-16	90.9	0	0	0	0	Extracellular	Soluble	OTHER	0.007954
Sma_007453-T1	Hemostasis impairing toxins	698	Q7SZN0	Venom prothrombin activator pseutarin-C non-catalytic subunit (PCNS) (vPA) (Venom coagulation factor Va-like protein) [Cleaved into: Pseutarin-C non-catalytic subunit heavy chain; Pseutarin-C non-catalytic subunit light chain]	1.86e-24	47.352	105.531	O43854	EGF-like repeat and discoidin I-like domain-containing protein 3 (Developmentally-regulated endothelial cell locus 1 protein) (Integrin-binding protein DEL1)	8.54e-24	43.5829	108.997	XP_028417633	Coagulation factor VIII	1.75078e-56	49.2218	220.32	protein tyrosine kinase collagen receptor activity	8.7e-48	198.7	EC:2.7.10.1	2	P:GO:0008045; P:GO:0048680	P:motor neuron axon guidance; P:positive regulation of axon regeneration	Extracellular	Soluble	OTHER	0.002573
Sma_007539-T1	Phospholipases	206	I7GQA7	Phospholipase A(2) (EC 3.1.1.4) (Phosphatidylcholine 2-acylhydrolase)	8.94e-22	54.4715	84.3445	I7GQA7	Phospholipase A(2) (EC 3.1.1.4) (Phosphatidylcholine 2-acylhydrolase)	2.12e-19	54.4715	84.3445	AOT85612, AOT85614	phospholipase A2 isozymes PA3A/PA3B/PA5-like	3.00295e-34	59.854	129.413	phospholipase A2-like	2.8e-18	99	EC:3.1.1.4	0	0	0	Extracellular	Soluble	OTHER	0.087921
Sma_007566-T1	Hemostasis impairing toxins	582	Q56EB0	Snaclec bothrojaracin subunit beta (BJC subunit beta)	4.84e-16	48.9362	72.0182	Q9H4G4	Golgi-associated plant pathogenesis-related protein 1 (GAPR-1) (Golgi-associated PR-1 protein) (Glioma pathogenesis-related protein 2) (GliPR 2)	5.96e-17	50.9934	81.2629	XP_028406280	proline-rich protein 36-like	1.08334e-58	48.9848	215.312	peptidase inhibitor activity	9.3e-112	411	0	10	P:GO:0006909; F:GO:0004888; C:GO:0005623; C:GO:0005887; P:GO:0098657; P:GO:0007165; C:GO:0099568; C:GO:0005938; P:GO:0006897; C:GO:0030175	C:integral component of plasma membrane; C:cell cortex; P:import into cell; P:signal transduction; C:obsolete cell; F:transmembrane signaling receptor activity; C:cytoplasmic region; C:filopodium; P:endocytosis; P:phagocytosis	Extracellular	Soluble	OTHER	0.000854
Sma_007717-T1	Pore-forming toxins	1767	A0ZSK4	Neoverrucotoxin subunit beta (NeoVTX subunit beta)	2.75e-18	45.1149	87.0409	P51635	Aldo-keto reductase family 1 member A1 (EC 1.1.1.2) (EC 1.1.1.33) (EC 1.1.1.372) (EC 1.1.1.54) (3-DG-reducing enzyme) (Alcohol dehydrogenase [NADP(+)]) (Aldehyde reductase) (Glucuronate reductase) (EC 1.1.1.19) (Glucuronolactone reductase) (EC 1.1.1.20)	1.79e-72	61.2903	248.825	XP_028397642	p-loop containing nucleoside triphosphate hydrolase	0	58.4629	762.681	0	2.1e-183	650.6	0	0	0	0	Cytoplasm	Soluble	OTHER	0.000786
Sma_007725-T1	Proteases	693	B5U2W0	Venom serine protease Bi-VSP (EC 3.4.21.-) (Thrombin-like enzyme)	3.27e-31	51.8367	121.709	P69525	Transmembrane protease serine 9 (EC 3.4.21.-) (Polyserase-I) (Polyserine protease 1) (Polyserase-1) [Cleaved into: Serase-1; Serase-2; Serase-3]	2.98e-43	41.5	171.785	XP_033963869	transmembrane protease serine 9-like	6.24664e-54	43.6975	213.001	serine-type endopeptidase activity	3.1e-53	216.9	EC:3.4.21.119	6	P:GO:0070268; C:GO:0005623; F:GO:0004252; P:GO:0006508; C:GO:0005615; C:GO:0030141	P:cornification; C:extracellular space; F:serine-type endopeptidase activity; C:obsolete cell; P:proteolysis; C:secretory granule	Extracellular	Soluble	OTHER	0.00051
Sma_007759-T1	Neurotoxin	451	Q25338	Delta-latroinsectotoxin-Lt1a (Delta-LIT-Lt1a) (Delta-latroinsectotoxin) (Delta-LIT)	1.02e-19	56.213	88.5817	Q86YT6	E3 ubiquitin-protein ligase MIB1 (EC 2.3.2.27) (DAPK-interacting protein 1) (DIP-1) (Mind bomb homolog 1) (RING-type E3 ubiquitin transferase MIB1) (Zinc finger ZZ type with ankyrin repeat domain protein 2)	0	78.8889	587.03	XP_005102534	E3 ubiquitin-protein ligase MIB1 isoform X3	0	81.1494	609.372	E3 ubiquitin-protein ligase MIB1	3.7e-116	425.2	EC:2.3.2.27	17	F:GO:0004842; P:GO:0045807; P:GO:0001841; P:GO:0001568; P:GO:0001701; P:GO:0001756; P:GO:0007219; P:GO:0045665; C:GO:0031410; C:GO:0005886; C:GO:0005623; P:GO:0098657; P:GO:0001947; C:GO:0005813; C:GO:0014069; P:GO:0016567; C:GO:0005829	P:neural tube formation; P:Notch signaling pathway; P:negative regulation of neuron differentiation; P:blood vessel development; F:ubiquitin-protein transferase activity; P:import into cell; P:positive regulation of endocytosis; P:in utero embryonic development; C:plasma membrane; C:cytosol; C:postsynaptic density; P:protein ubiquitination; C:centrosome; C:obsolete cell; C:cytoplasmic vesicle; P:…	Cytoplasm	Soluble	OTHER	0.006453
Sma_008233-T1	Proteases	803	O42138	Zinc metalloproteinase-disintegrin-like ACLD (EC 3.4.24.-) (Snake venom metalloproteinase) (SVMP) (VMP-III) (AclVMP-III)	1.39e-28	44.8763	117.857	Q05910	Disintegrin and metalloproteinase domain-containing protein 8 (ADAM 8) (EC 3.4.24.-) (Cell surface antigen MS2) (Macrophage cysteine-rich glycoprotein) (CD antigen CD156a)	3.18e-26	45.9119	119.013	XP_019620048	disintegrin and metalloproteinase domain-containing protein 8 isoform X1	2.3142e-78	47.3684	286.574	ADAM Cysteine-Rich Domain	2.2e-23	117.9	0	48	P:GO:0010954; P:GO:2000415; C:GO:0070821; P:GO:2000418; P:GO:0051044; F:GO:0008237; P:GO:0061025; P:GO:0001525; P:GO:0048729; P:GO:0002675; F:GO:0005509; P:GO:0043312; P:GO:0043534; F:GO:0008270; P:GO:0070245; F:GO:0043621; P:GO:0071456; P:GO:2000391; P:GO:0048247; P:GO:0045670; F:GO:0004252; C:GO:0032010; P:GO:0032989; P:GO:2000399; P:GO:0050714; C:GO:0101003; P:GO:0033089; C:GO:0101002; P:GO:20…	C:alpha9-beta1 integrin-ADAM8 complex; P:positive regulation of neutrophil extravasation; P:positive regulation of tumor necrosis factor (ligand) superfamily member 11 production; P:leukocyte migration involved in inflammatory response; P:cell-matrix adhesion; P:regulation of osteoclast differentiation; P:negative regulation of thymocyte aggregation; P:positive regulation of bone resorption; F:pr…	Extracellular	Soluble	SP(Sec/SPI)	0.998047
Sma_008233-T2	Proteases	802	O42138	Zinc metalloproteinase-disintegrin-like ACLD (EC 3.4.24.-) (Snake venom metalloproteinase) (SVMP) (VMP-III) (AclVMP-III)	2.31e-27	44.523	114.005	Q05910	Disintegrin and metalloproteinase domain-containing protein 8 (ADAM 8) (EC 3.4.24.-) (Cell surface antigen MS2) (Macrophage cysteine-rich glycoprotein) (CD antigen CD156a)	1.48e-25	45.9119	116.701	XP_019620048	disintegrin and metalloproteinase domain-containing protein 8 isoform X1	2.67834e-76	47.2881	280.796	ADAM Cysteine-Rich Domain	7.2e-22	112.8	0	48	P:GO:0010954; P:GO:2000415; C:GO:0070821; P:GO:2000418; P:GO:0051044; F:GO:0008237; P:GO:0061025; P:GO:0001525; P:GO:0048729; P:GO:0002675; F:GO:0005509; P:GO:0043312; P:GO:0043534; F:GO:0008270; P:GO:0070245; F:GO:0043621; P:GO:0071456; P:GO:2000391; P:GO:0048247; P:GO:0045670; F:GO:0004252; C:GO:0032010; P:GO:0032989; P:GO:2000399; P:GO:0050714; C:GO:0101003; P:GO:0033089; C:GO:0101002; P:GO:20…	C:alpha9-beta1 integrin-ADAM8 complex; P:positive regulation of neutrophil extravasation; P:positive regulation of tumor necrosis factor (ligand) superfamily member 11 production; P:leukocyte migration involved in inflammatory response; P:cell-matrix adhesion; P:regulation of osteoclast differentiation; P:negative regulation of thymocyte aggregation; P:positive regulation of bone resorption; F:pr…	Extracellular	Soluble	SP(Sec/SPI)	0.997126
Sma_008233-T3	Proteases	801	O42138	Zinc metalloproteinase-disintegrin-like ACLD (EC 3.4.24.-) (Snake venom metalloproteinase) (SVMP) (VMP-III) (AclVMP-III)	7.02e-29	45.2632	119.013	Q05910	Disintegrin and metalloproteinase domain-containing protein 8 (ADAM 8) (EC 3.4.24.-) (Cell surface antigen MS2) (Macrophage cysteine-rich glycoprotein) (CD antigen CD156a)	7.98e-27	45.8599	120.939	XP_019620048	disintegrin and metalloproteinase domain-containing protein 8 isoform X3	6.13018e-72	46.1938	268.085	ADAM Cysteine-Rich Domain	5.3e-25	123.2	0	48	P:GO:0010954; P:GO:2000415; C:GO:0070821; P:GO:2000418; P:GO:0051044; F:GO:0008237; P:GO:0061025; P:GO:0001525; P:GO:0048729; P:GO:0002675; F:GO:0005509; P:GO:0043312; P:GO:0043534; F:GO:0008270; P:GO:0070245; F:GO:0043621; P:GO:0071456; P:GO:2000391; P:GO:0048247; P:GO:0045670; F:GO:0004252; C:GO:0032010; P:GO:0032989; P:GO:2000399; P:GO:0050714; C:GO:0101003; P:GO:0033089; C:GO:0101002; P:GO:20…	C:alpha9-beta1 integrin-ADAM8 complex; P:positive regulation of neutrophil extravasation; P:positive regulation of tumor necrosis factor (ligand) superfamily member 11 production; P:leukocyte migration involved in inflammatory response; P:cell-matrix adhesion; P:regulation of osteoclast differentiation; P:negative regulation of thymocyte aggregation; P:positive regulation of bone resorption; F:pr…	Extracellular	Soluble	SP(Sec/SPI)	0.998849
Sma_008301-T1	Hemostasis impairing toxins	593	Q593B6	Coagulation factor V [Cleaved into: Coagulation factor V heavy chain; Coagulation factor V light chain]	1.97e-22	48.1818	98.5969	Q9GLP1	Coagulation factor V (Activated protein C cofactor) [Cleaved into: Coagulation factor V heavy chain; Coagulation factor V light chain]	4.26e-24	47.2727	111.309	XP_028417633	venom prothrombin activator pseutarin-C non-catalytic subunit-like	1.65307e-54	49.505	211.846	protein tyrosine kinase collagen receptor activity	1.4e-43	184.5	EC:2.7.10.1	2	P:GO:0008045; P:GO:0048680	P:motor neuron axon guidance; P:positive regulation of axon regeneration	Extracellular	Soluble	OTHER	0.006621
Sma_008327-T1	Hemostasis impairing toxins	824	Q66S03	Galactose-specific lectin nattectin (CTL)	5.27e-15	45.1852	69.707	Q8WPD0	Alpha-N-acetylgalactosamine-specific lectin (Alpha-N-acetylgalactosamine-binding lectin) (GalNAc-specific lectin) (Lectin) (ApL) (Tn antigen-specific lectin)	4.04e-17	46.8966	82.8037	XP_012563990	Brevican core protein	4.0798e-118	57.9918	392.119	structural constituent of cell wall	5.2e-60	239.6	0	0	0	0	Extracellular	Soluble	SP(Sec/SPI)	0.860329
Sma_008351-T1	Other toxins	610	Q92035	Acetylcholinesterase (BfAChE) (EC 3.1.1.7)	1.53e-40	44.246	152.525	P22303	Acetylcholinesterase (AChE) (EC 3.1.1.7)	6.13e-46	42.8571	174.866	XP_020602954	para-nitrobenzyl esterase-like	4.07443e-143	57.7849	438.728	Carboxylesterase family	3e-105	389.4	0	6	P:GO:0007413; P:GO:0007411; F:GO:0052689; C:GO:0005623; C:GO:0016323; P:GO:0007417	C:basolateral plasma membrane; C:obsolete cell; P:axon guidance; P:central nervous system development; F:carboxylic ester hydrolase activity; P:axonal fasciculation	Lysosome/Vacuole	Soluble	OTHER	0.000356
Sma_008360-T1	Other toxins	740	Q92035	Acetylcholinesterase (BfAChE) (EC 3.1.1.7)	1.85e-41	44.246	156.762	P23795	Acetylcholinesterase (AChE) (EC 3.1.1.7)	1.15e-46	43.5644	179.104	XP_020602954	para-nitrobenzyl esterase-like	1.22258e-133	58.2363	418.698	Carboxylesterase family	3.4e-103	382.9	0	6	P:GO:0007413; P:GO:0007411; F:GO:0052689; C:GO:0005623; C:GO:0016323; P:GO:0007417	C:basolateral plasma membrane; C:obsolete cell; P:axon guidance; P:central nervous system development; F:carboxylic ester hydrolase activity; P:axonal fasciculation	Cell membrane	Membrane	OTHER	0.000358
Sma_008361-T1	Other toxins	741	Q92035	Acetylcholinesterase (BfAChE) (EC 3.1.1.7)	2.59e-40	45.4545	153.295	P22303	Acetylcholinesterase (AChE) (EC 3.1.1.7)	3.37e-45	43.75	174.866	XP_020602954	para-nitrobenzyl esterase-like	1.02833e-137	58.6491	429.098	Carboxylesterase family	1.9e-101	377.1	0	6	P:GO:0007413; P:GO:0007411; F:GO:0052689; C:GO:0005623; C:GO:0016323; P:GO:0007417	C:basolateral plasma membrane; C:obsolete cell; P:axon guidance; P:central nervous system development; F:carboxylic ester hydrolase activity; P:axonal fasciculation	Lysosome/Vacuole	Membrane	OTHER	0.000732
Sma_008504-T1	Neurotoxin	347	Q9XZC0	Alpha-latrocrustotoxin-Lt1a (Alpha-LCT-Lt1a) (Alpha-latrocrustotoxin) (Alpha-LCT) (Crusta1) (Fragment)	1.12e-12	54.3478	65.4698	Q4R739	Ankyrin repeat domain-containing protein 53	1.73e-31	53.3654	126.716	XP_022797783	ankyrin repeat domain-containing protein 53-like	3.82853e-62	56.3636	212.231	Ankyrin repeat domain-containing protein 53	2.2e-39	169.9	0	6	C:GO:0000922; P:GO:1902412; C:GO:0005623; P:GO:0060236; P:GO:0031116; P:GO:0007080	C:spindle pole; P:regulation of mitotic spindle organization; P:positive regulation of microtubule polymerization; C:obsolete cell; P:mitotic metaphase plate congression; P:regulation of mitotic cytokinesis	Cytoplasm	Soluble	OTHER	0.000843
Sma_008570-T1	Hemostasis impairing toxins	489	A6MFK8	Venom prothrombin activator vestarin-D2 (vPA) (EC 3.4.21.6) (Venom coagulation factor Xa-like protease) [Cleaved into: Vestarin-D2 light chain; Vestarin-D2 heavy chain]	1.27e-49	57.7236	173.326	P14272	Plasma kallikrein (EC 3.4.21.34) (Fletcher factor) (Kininogenin) (Plasma prekallikrein) [Cleaved into: Plasma kallikrein heavy chain; Plasma kallikrein light chain]	6.5e-63	59.8425	219.164	XP_015775278	transmembrane protease serine 6-like	2.58043e-81	49.8134	271.937	blood coagulation, intrinsic pathway	1.2e-56	227.6	EC:3.4.21.34	12	P:GO:0007597; F:GO:0042803; P:GO:0022617; C:GO:0005886; C:GO:0005623; P:GO:0051919; P:GO:0097421; P:GO:0031639; F:GO:0004252; C:GO:0005615; P:GO:0010430; P:GO:0002542	P:fatty acid omega-oxidation; F:protein homodimerization activity; P:positive regulation of fibrinolysis; C:extracellular space; P:extracellular matrix disassembly; F:serine-type endopeptidase activity; C:obsolete cell; P:plasminogen activation; P:Factor XII activation; P:liver regeneration; P:blood coagulation, intrinsic pathway; C:plasma membrane	Extracellular	Soluble	SP(Sec/SPI)	0.997529
Sma_008697-T1	Hemostasis impairing toxins	1106	Q58L93	Venom prothrombin activator porpharin-D (vPA) (EC 3.4.21.6) (Venom coagulation factor Xa-like protease) [Cleaved into: Porpharin-D light chain; Porpharin-D heavy chain]	1.94e-40	52.3438	152.14	D3YXG0	Hemicentin-1 (Fibulin-6) (FIBL-6)	4.04e-61	48.3333	233.802	XP_012562423	SCO-spondin-like	0	52.4575	637.876	Thrombospondin type 1 repeats	4e-63	250.4	0	0	0	0	Extracellular	Soluble	OTHER	0.027225
Sma_008794-T1	Proteases	457	C9WMM5	Venom serine carboxypeptidase (EC 3.4.16.5) (allergen Api m 9)	4.51e-48	48.0769	168.318	Q920A5	Retinoid-inducible serine carboxypeptidase (EC 3.4.16.-) (Serine carboxypeptidase 1)	4.05e-148	66.8258	432.565	RMX55869	Retinoid-inducible serine carboxypeptidase	0	72.0824	533.872	serine-type carboxypeptidase activity	4.1e-139	501.5	0	7	P:GO:0045776; P:GO:0097755; P:GO:0042573; C:GO:0005623; F:GO:0004185; C:GO:0005829; P:GO:0051603	P:negative regulation of blood pressure; P:proteolysis involved in cellular protein catabolic process; P:retinoic acid metabolic process; C:obsolete cell; F:serine-type carboxypeptidase activity; P:positive regulation of blood vessel diameter; C:cytosol	Extracellular	Soluble	SP(Sec/SPI)	0.923067
Sma_009035-T1	Proteases	857	P20164	Zinc metalloproteinase-disintegrin-like HR1b (EC 3.4.24.-) (Snake venom metalloproteinase) (SVMP) (Trimerelysin I) (Trimerelysin-1) [Cleaved into: Disintegrin-like 1b]	1.8e-102	51.7707	327.405	Q61824	Disintegrin and metalloproteinase domain-containing protein 12 (ADAM 12) (EC 3.4.24.-) (Meltrin-alpha)	2.93e-123	49.2271	396.741	XP_006821011	Disintegrin and metalloproteinase domain-containing protein 12	8.12006e-152	57.4746	479.174	Disintegrin and metalloproteinase domain-containing protein	1.3e-130	474.2	0	51	C:GO:0016021; P:GO:0007520; P:GO:1900121; P:GO:0051088; P:GO:0051044; P:GO:0042127; P:GO:0060317; F:GO:0005080; P:GO:0042246; F:GO:0008270; C:GO:0005654; P:GO:0030308; P:GO:0050714; P:GO:0051592; P:GO:0001890; F:GO:0004222; F:GO:0017124; F:GO:0005518; P:GO:0045766; C:GO:0031233; F:GO:0043236; P:GO:0022617; P:GO:0010042; P:GO:0071222; P:GO:0045087; P:GO:0051384; P:GO:0033631; P:GO:0033630; P:GO:00…	P:myoblast fusion; P:PMA-inducible membrane protein ectodomain proteolysis; P:response to glucocorticoid; P:negative regulation of cell growth; F:integrin binding; P:positive regulation of keratinocyte migration; P:cellular response to phorbol 13-acetate 12-myristate; P:positive regulation of macrophage fusion; P:negative regulation of cell-matrix adhesion; C:extracellular exosome; P:positive reg…	Cell membrane	Membrane	SP(Sec/SPI)	0.982469
Sma_009036-T1	Proteases	879	P20164	Zinc metalloproteinase-disintegrin-like HR1b (EC 3.4.24.-) (Snake venom metalloproteinase) (SVMP) (Trimerelysin I) (Trimerelysin-1) [Cleaved into: Disintegrin-like 1b]	8.81e-79	54.4304	264.233	P20164	Zinc metalloproteinase-disintegrin-like HR1b (EC 3.4.24.-) (Snake venom metalloproteinase) (SVMP) (Trimerelysin I) (Trimerelysin-1) [Cleaved into: Disintegrin-like 1b]	2.09e-76	54.4304	264.233	NP_001353340	disintegrin and metalloproteinase domain-containing protein 19-like isoform X3	2.24852e-87	46.7717	311.227	disintegrin and metalloproteinase	2.2e-80	307.4	0	0	0	0	Cell membrane	Membrane	OTHER	0.002523
Sma_009051-T1	Hemostasis impairing toxins	461	C6JUN9	C-type lectin (CTL)	1.42e-15	48.855	70.4774	P20693	Low affinity immunoglobulin epsilon Fc receptor (Fc-epsilon-RII) (Lymphocyte IgE receptor) (CD antigen CD23)	1.92e-17	57.1429	86.2705	XP_027699913	low affinity immunoglobulin epsilon Fc receptor isoform X3	6.75501e-17	49.7238	93.5893	carbohydrate binding	1.1e-17	98.2	0	0	0	0	Extracellular	Soluble	OTHER	0.000246
Sma_009256-T1	Hemostasis impairing toxins	744	Q7SZN0	Venom prothrombin activator pseutarin-C non-catalytic subunit (PCNS) (vPA) (Venom coagulation factor Va-like protein) [Cleaved into: Pseutarin-C non-catalytic subunit heavy chain; Pseutarin-C non-catalytic subunit light chain]	7.12e-20	44.7368	91.2781	O60462	Neuropilin-2 (Vascular endothelial cell growth factor 165 receptor 2)	1.77e-23	44.4444	110.153	XP_028417633	EGF-like repeat and discoidin I-like domain-containing protein 3	2.3232e-46	50.4854	190.66	Chromosome 9 open reading frame 116	1.6e-28	134.8	0	0	0	0	Extracellular	Soluble	OTHER	0.009238
Sma_009641-T1	Hemostasis impairing toxins	1155	Q58L91	Venom prothrombin activator oscutarin-C non-catalytic subunit (vPA) (Venom coagulation factor Va-like protein) [Cleaved into: Oscutarin-C non-catalytic subunit heavy chain; Oscutarin-C non-catalytic subunit light chain]	1.33e-18	49.6815	88.1965	Q58L91	Venom prothrombin activator oscutarin-C non-catalytic subunit (vPA) (Venom coagulation factor Va-like protein) [Cleaved into: Oscutarin-C non-catalytic subunit heavy chain; Oscutarin-C non-catalytic subunit light chain]	3.15e-16	49.6815	88.1965	XP_002155492	lactadherin-like	6.61552e-48	67.6647	179.874	protein tyrosine kinase collagen receptor activity	4.1e-42	180.6	EC:2.7.10.1	2	P:GO:0008045; P:GO:0048680	P:motor neuron axon guidance; P:positive regulation of axon regeneration	Nucleus	Soluble	OTHER	0.001374
Sma_010244-T2	Hemostasis impairing toxins	611	Q58L91	Venom prothrombin activator oscutarin-C non-catalytic subunit (vPA) (Venom coagulation factor Va-like protein) [Cleaved into: Oscutarin-C non-catalytic subunit heavy chain; Oscutarin-C non-catalytic subunit light chain]	9.9e-17	43.3022	80.4925	Q9GLP1	Coagulation factor V (Activated protein C cofactor) [Cleaved into: Coagulation factor V heavy chain; Coagulation factor V light chain]	4.64e-19	43.8272	95.5153	XP_028417633	venom prothrombin activator pseutarin-C non-catalytic subunit-like	1.08868e-45	47.8615	186.037	coagulation factor V	5.5e-30	139.4	0	13	P:GO:0008015; P:GO:0007596; P:GO:0002576; P:GO:0048208; C:GO:0005794; C:GO:0030134; C:GO:0033116; P:GO:0043687; C:GO:0005886; C:GO:0005623; C:GO:0005788; C:GO:0031093; C:GO:0005615	C:endoplasmic reticulum lumen; P:platelet degranulation; C:extracellular space; C:platelet alpha granule lumen; P:blood circulation; P:COPII vesicle coating; C:plasma membrane; C:endoplasmic reticulum-Golgi intermediate compartment membrane; P:blood coagulation; P:post-translational protein modification; C:obsolete cell; C:COPII-coated ER to Golgi transport vesicle; C:Golgi apparatus	Extracellular	Soluble	OTHER	0.002731
Sma_010246-T1	Proteases	423	Q76B45	Blarina toxin (BLTX) (EC 3.4.21.-)	2.1e-41	48.5294	144.821	P22457	Coagulation factor VII (EC 3.4.21.21) (Serum prothrombin conversion accelerator) [Cleaved into: Factor VII light chain; Factor VII heavy chain]	3.02e-50	45.3608	179.104	XP_012557610	chymotrypsin-like protease 1	1.9004e-72	52.9086	242.276	transmembrane protease serine 5	9.6e-58	231.1	0	5	C:GO:0005886; C:GO:0005623; P:GO:0006508; F:GO:0008233; C:GO:0043025	F:peptidase activity; C:neuronal cell body; C:obsolete cell; P:proteolysis; C:plasma membrane	Extracellular	Soluble	OTHER	0.007954
Sma_010394-T1	Hemostasis impairing toxins	611	D8VNS8	Ryncolin-2	4.85e-55	63.5897	187.193	Q29042	Ficolin-1 (Ficolin-A) (Ficolin-alpha)	5.91e-58	66.4921	200.675	XP_020904368	angiopoietin-related protein 7	1.93498e-102	49.5826	332.798	mesenchymal-epithelial cell signaling involved in prostate gland development	4e-57	229.6	0	16	P:GO:0060739; P:GO:0010628; P:GO:0030198; P:GO:0060740; P:GO:0007528; P:GO:0060447; F:GO:0001968; P:GO:0043687; P:GO:0014012; C:GO:0005623; C:GO:0005788; P:GO:0007162; P:GO:0008284; C:GO:0005614; F:GO:0045545; C:GO:0005604	P:prostate gland epithelium morphogenesis; C:interstitial matrix; P:mesenchymal-epithelial cell signaling involved in prostate gland development; C:basement membrane; C:endoplasmic reticulum lumen; P:negative regulation of cell adhesion; P:positive regulation of cell population proliferation; F:syndecan binding; P:bud outgrowth involved in lung branching; P:extracellular matrix organization; P:po…	Cell membrane	Membrane	OTHER	0.00057
Sma_010483-T1	Hemostasis impairing toxins	634	D8VNT0	Ryncolin-4	8.7e-55	61.1374	186.808	O70165	Ficolin-1 (Collagen/fibrinogen domain-containing protein 1) (Ficolin-A) (Ficolin-alpha) (M-ficolin)	9.24e-59	63.3333	203.371	XP_020904368	Fibrinogen C domain-containing protein 1	4.51474e-107	52.677	345.51	mesenchymal-epithelial cell signaling involved in prostate gland development	9.9e-59	235	0	16	P:GO:0060739; P:GO:0010628; P:GO:0030198; P:GO:0060740; P:GO:0007528; P:GO:0060447; F:GO:0001968; P:GO:0043687; P:GO:0014012; C:GO:0005623; C:GO:0005788; P:GO:0007162; P:GO:0008284; C:GO:0005614; F:GO:0045545; C:GO:0005604	P:prostate gland epithelium morphogenesis; C:interstitial matrix; P:mesenchymal-epithelial cell signaling involved in prostate gland development; C:basement membrane; C:endoplasmic reticulum lumen; P:negative regulation of cell adhesion; P:positive regulation of cell population proliferation; F:syndecan binding; P:bud outgrowth involved in lung branching; P:extracellular matrix organization; P:po…	Extracellular	Soluble	OTHER	0.001345
Sma_010485-T1	Hemostasis impairing toxins	637	D8VNS8	Ryncolin-2	1.31e-52	63.0332	181.03	O70165	Ficolin-1 (Collagen/fibrinogen domain-containing protein 1) (Ficolin-A) (Ficolin-alpha) (M-ficolin)	7.13e-59	59.1667	203.756	XP_020622044	basement membrane-specific heparan sulfate proteoglycan core protein-like	3.88188e-109	54.4627	353.599	mesenchymal-epithelial cell signaling involved in prostate gland development	3.4e-59	236.5	0	16	P:GO:0060739; P:GO:0010628; P:GO:0030198; P:GO:0060740; P:GO:0007528; P:GO:0060447; F:GO:0001968; P:GO:0043687; P:GO:0014012; C:GO:0005623; C:GO:0005788; P:GO:0007162; P:GO:0008284; C:GO:0005614; F:GO:0045545; C:GO:0005604	P:prostate gland epithelium morphogenesis; C:interstitial matrix; P:mesenchymal-epithelial cell signaling involved in prostate gland development; C:basement membrane; C:endoplasmic reticulum lumen; P:negative regulation of cell adhesion; P:positive regulation of cell population proliferation; F:syndecan binding; P:bud outgrowth involved in lung branching; P:extracellular matrix organization; P:po…	Extracellular	Soluble	OTHER	0.001179
Sma_010631-T1	Hemostasis impairing toxins	599	D8VNS8	Ryncolin-2	2.27e-71	67.7885	230.335	O70497	Ficolin-2 (Collagen/fibrinogen domain-containing protein 2) (Ficolin-B) (Ficolin-beta) (L-ficolin)	6.32e-73	66.3462	239.195	XP_031567787	Fibrinogen C domain-containing protein 1	1.25229e-106	54.6154	345.125	cell surface pattern recognition receptor signaling pathway	1.2e-66	261.2	0	0	0	0	Extracellular	Soluble	OTHER	0.00257
Sma_010709-T1	Hemostasis impairing toxins	1437	A7X3X8	C-type lectin lectoxin-Enh5 (CTL)	3.76e-16	48.2014	73.559	A7S6A1	UPF0518 protein v1g243165	3.3e-128	52.3419	422.55	XP_002163723	UPF0518 protein v1g243165-like	1.17362e-152	57.4941	493.812	Family with sequence similarity 160, member	2e-131	477.6	0	6	P:GO:0008333; P:GO:0007032; C:GO:0005623; P:GO:0045022; P:GO:0007040; C:GO:0070695	P:endosome to lysosome transport; P:lysosome organization; C:FHF complex; C:obsolete cell; P:early endosome to late endosome transport; P:endosome organization	Cytoplasm	Soluble	OTHER	0.006287
Sma_010811-T1	Protease Inhibitors	180	J3RYX9	Cystatin-1	4.3e-12	53.5714	57.3806	J3RYX9	Cystatin-1	1.02e-09	53.5714	57.3806	XP_030603369	cystatin-like	5.06332e-18	59.0551	85.8853	Cystatin-like	1.6e-09	69.7	0	0	0	0	Extracellular	Soluble	OTHER	0.176163
Sma_011128-T1	Other toxins	172	Q3SB11	Calglandulin	3.55e-11	48.4663	55.0694	Q6AXQ2	EF-hand calcium-binding domain-containing protein 11	4.49e-25	53.1646	97.8265	XP_025091881	EF-hand calcium-binding domain-containing protein 11-like	1.28904e-33	61.25	127.102	calcium ion binding	2.5e-20	105.5	0	1	F:GO:0005509	F:calcium ion binding	Nucleus	Soluble	OTHER	0.001078
Sma_011716-T1	Hemostasis impairing toxins	2684	Q7SZN0	Venom prothrombin activator pseutarin-C non-catalytic subunit (PCNS) (vPA) (Venom coagulation factor Va-like protein) [Cleaved into: Pseutarin-C non-catalytic subunit heavy chain; Pseutarin-C non-catalytic subunit light chain]	1.07e-20	44.4785	96.6709	P16621	Tyrosine-protein phosphatase Lar (EC 3.1.3.48) (Protein-tyrosine-phosphate phosphohydrolase) (dLAR)	8.06e-131	45.6959	462.611	XP_031551581	receptor-type tyrosine-protein phosphatase S-like isoform X3	3.45117e-171	46.1777	590.497	protein tyrosine phosphatase activity	5.2e-125	457.2	EC:3.1.3.48	0	0	0	Cell membrane	Membrane	OTHER	0.002147
Sma_011730-T1	Hemostasis impairing toxins	1773	Q593B6	Coagulation factor V [Cleaved into: Coagulation factor V heavy chain; Coagulation factor V light chain]	1.08e-31	50.4615	131.724	B7ZCC9	Adhesion G-protein coupled receptor G4 (G-protein coupled receptor 112)	1.63e-67	50.0855	257.684	XP_020896215	adhesion G protein-coupled receptor L3-like isoform X1	0	54.414	828.165	protein tyrosine phosphatase activity	3.9e-193	682.9	0	0	0	0	Cell membrane	Membrane	SP(Sec/SPI)	0.697338
Sma_011730-T2	Hemostasis impairing toxins	1668	Q593B6	Coagulation factor V [Cleaved into: Coagulation factor V heavy chain; Coagulation factor V light chain]	4.38e-26	52.4	113.235	B7ZCC9	Adhesion G-protein coupled receptor G4 (G-protein coupled receptor 112)	7.38e-68	50.0855	258.455	XP_020896215	adhesion G protein-coupled receptor L3-like isoform X2	0	55.0953	792.341	protein tyrosine phosphatase activity	4.3e-178	632.9	0	0	0	0	Cell membrane	Membrane	OTHER	0.003833
Sma_011771-T1	Hemostasis impairing toxins	3874	Q7SZN0	Venom prothrombin activator pseutarin-C non-catalytic subunit (PCNS) (vPA) (Venom coagulation factor Va-like protein) [Cleaved into: Pseutarin-C non-catalytic subunit heavy chain; Pseutarin-C non-catalytic subunit light chain]	4.59e-29	48.9676	124.79	P16621	Tyrosine-protein phosphatase Lar (EC 3.1.3.48) (Protein-tyrosine-phosphate phosphohydrolase) (dLAR)	1.74e-133	42.8331	472.241	XP_020625308	tyrosine-protein phosphatase Lar isoform X2	1.3994e-176	46.1731	620.157	Protein tyrosine phosphatase, receptor type D	1.1e-144	523.1	EC:3.1.3.48	31	P:GO:0051124; F:GO:0005102; P:GO:0008594; P:GO:0031290; P:GO:0046426; P:GO:0097105; P:GO:0048841; P:GO:1903386; P:GO:0050775; P:GO:0050776; C:GO:0005912; P:GO:0035335; F:GO:0005001; P:GO:0051965; P:GO:0007412; P:GO:0007157; P:GO:0051491; P:GO:1902532; P:GO:0008045; P:GO:0060269; P:GO:0045467; F:GO:0032093; C:GO:0030424; C:GO:0005623; C:GO:0005887; P:GO:0007283; P:GO:0007185; C:GO:0009925; F:GO:00…	C:cell leading edge; P:negative regulation of receptor signaling pathway via JAK-STAT; P:positive regulation of synapse assembly; F:signaling receptor binding; P:negative regulation of homophilic cell adhesion; P:centripetally migrating follicle cell migration; P:negative regulation of intracellular signal transduction; P:positive regulation of filopodium assembly; F:transmembrane receptor protei…	Cell membrane	Membrane	OTHER	0.001375
Sma_011915-T1	Hemostasis impairing toxins	2063	Q58L90	Venom prothrombin activator omicarin-C non-catalytic subunit (vPA) (Venom coagulation factor Va-like protein) [Cleaved into: Omicarin-C non-catalytic subunit heavy chain; Omicarin-C non-catalytic subunit light chain]	1.66e-29	48.5981	125.176	P16621	Tyrosine-protein phosphatase Lar (EC 3.1.3.48) (Protein-tyrosine-phosphate phosphohydrolase) (dLAR)	2.27e-71	41.5219	270.396	RMX51533	receptor-type tyrosine-protein phosphatase F-like	7.05225e-84	49.005	320.857	sympathetic neuron projection guidance	1.4e-69	272.7	0	35	C:GO:0016021; C:GO:0002116; F:GO:0017154; P:GO:0001525; P:GO:0003148; P:GO:0061549; P:GO:0021612; P:GO:0048846; F:GO:0019838; P:GO:0050919; F:GO:0019955; P:GO:0036486; F:GO:0005021; P:GO:0010595; P:GO:0097490; P:GO:1904835; P:GO:0097491; P:GO:0007155; P:GO:1901166; P:GO:1990830; P:GO:0038084; P:GO:0097374; P:GO:0001938; F:GO:0042802; P:GO:0021824; P:GO:0021649; P:GO:0061551; C:GO:0030424; C:GO:00…	F:vascular endothelial growth factor-activated receptor activity; F:cytokine binding; P:trigeminal ganglion development; P:positive regulation of endothelial cell migration; P:vascular endothelial growth factor signaling pathway; P:axon extension involved in axon guidance; P:peptidyl-tyrosine phosphorylation; C:semaphorin receptor complex; P:cellular response to leukemia inhibitory factor; F:grow…	Cell membrane	Membrane	SP(Sec/SPI)	0.871531
Sma_012479-T1	Hemostasis impairing toxins	384	D8VNT0	Ryncolin-4	2.2e-47	56.8182	161.384	P22105	Tenascin-X (TN-X) (Hexabrachion-like protein)	2.35e-45	63.4409	170.629	XP_019861249	fibrinogen C domain-containing protein 1-like	1.25611e-56	60.4651	196.438	chitin binding	3.9e-50	205.7	0	2	C:GO:0016020; F:GO:0008061	F:chitin binding; C:membrane	Extracellular	Soluble	OTHER	0.005119
Sma_012798-T1	Neurotoxin	907	Q9XZC0	Alpha-latrocrustotoxin-Lt1a (Alpha-LCT-Lt1a) (Alpha-latrocrustotoxin) (Alpha-LCT) (Crusta1) (Fragment)	3.5e-10	40.1961	60.077	P97570	85/88 kDa calcium-independent phospholipase A2 (CaI-PLA2) (EC 3.1.1.4) (2-lysophosphatidylcholine acylhydrolase) (EC 3.1.1.5) (Group VI phospholipase A2) (GVI PLA2) (Intracellular membrane-associated calcium-independent phospholipase A2 beta) (iPLA2-beta) (Palmitoyl-CoA hydrolase) (EC 3.1.2.2) (Patatin-like phospholipase domain-containing protein 9) (PNPLA9)	2.29e-149	53.1995	463.766	XP_027043528	85/88 kDa calcium-independent phospholipase A2 isoform X1	5.15295e-172	53.7998	530.02	Phospholipase A2, group VI (cytosolic, calcium-independent)	8.5e-112	411.8	EC:3.1.1.4	32	P:GO:0032049; P:GO:0007204; F:GO:0017171; P:GO:0060135; P:GO:0097164; P:GO:1901339; P:GO:0006897; P:GO:0090037; F:GO:0043008; P:GO:0098657; P:GO:0090238; P:GO:0035774; C:GO:0005615; P:GO:0051967; C:GO:0005815; P:GO:0014832; P:GO:0034976; P:GO:2000304; P:GO:0007613; P:GO:0019731; P:GO:0038096; P:GO:0045921; F:GO:0019901; P:GO:0090200; P:GO:0036151; P:GO:0036152; P:GO:0097755; P:GO:0001934; C:GO:00…	P:urinary bladder smooth muscle contraction; P:positive regulation of exocytosis; C:extracellular space; P:import into cell; P:maternal process involved in female pregnancy; P:phosphatidylcholine acyl-chain remodeling; P:cardiolipin biosynthetic process; P:positive regulation of arachidonic acid secretion; C:cytosol; C:microtubule organizing center; P:positive regulation of blood vessel diameter;…	Cytoplasm	Soluble	OTHER	0.000628
Sma_013061-T1	Proteases	786	F8S108	Zinc metalloproteinase-disintegrin-like 4a (EC 3.4.24.-) (Snake venom metalloproteinase 7) (SVMP)	1.06e-91	47.6575	296.59	Q61824	Disintegrin and metalloproteinase domain-containing protein 12 (ADAM 12) (EC 3.4.24.-) (Meltrin-alpha)	5.01e-112	49.3171	364.77	XP_012780840	disintegrin and metalloproteinase domain-containing protein 12	1.19345e-119	48.8145	392.119	disintegrin and metalloproteinase	3.5e-106	392.9	0	0	0	0	Cell membrane	Membrane	SP(Sec/SPI)	0.992505
Sma_013548-T1	Hemostasis impairing toxins	193	D2YVH7	C-type lectin mannose-binding isoform (CTL) (Venom C-type lectin mannose-binding isoform 1)	3.34e-20	56.6372	79.337	D2YVH7	C-type lectin mannose-binding isoform (CTL) (Venom C-type lectin mannose-binding isoform 1)	7.91e-18	56.6372	79.337	XP_009063154, ESO86195	macrophage mannose receptor 1-like	1.72305e-20	58.1818	99.7525	C-type lectin (CTL) or carbohydrate-recognition domain (CRD)	9.5e-21	107.1	0	0	0	0	Extracellular	Soluble	OTHER	0.001707
Sma_013549-T1	Hemostasis impairing toxins	194	C6JUN9	C-type lectin (CTL)	4.77e-21	56.1404	81.6481	P16112	Aggrecan core protein (Cartilage-specific proteoglycan core protein) (CSPCP) (Chondroitin sulfate proteoglycan core protein 1) (Chondroitin sulfate proteoglycan 1) [Cleaved into: Aggrecan core protein 2]	3.75e-20	49.0196	90.8929	XP_026852918	aggrecan core protein-like isoform X1	2.18203e-19	60.3604	91.6633	carbohydrate binding	8.1e-20	104	0	0	0	0	Extracellular	Soluble	OTHER	0.001806
Sma_013550-T1	Hemostasis impairing toxins	186	D2YVH7	C-type lectin mannose-binding isoform (CTL) (Venom C-type lectin mannose-binding isoform 1)	3.16e-19	57.6271	76.6406	P20693	Low affinity immunoglobulin epsilon Fc receptor (Fc-epsilon-RII) (Lymphocyte IgE receptor) (CD antigen CD23)	7.45e-17	54.386	79.7221	XP_009063154, ESO86195	C-type mannose receptor 2	5.45349e-19	58.5586	95.1301	C-type lectin (CTL) or carbohydrate-recognition domain (CRD)	2.5e-18	99	0	0	0	0	Extracellular	Soluble	OTHER	0.001795
Sma_013551-T1	Hemostasis impairing toxins	153	A7X406	C-type lectin lectoxin-Phi1 (CTL)	3.41e-15	51.7857	65.0846	P06027	Echinoidin	1.35e-15	47.2441	72.0182	KAF4093218	aggrecan core protein	2.43994e-16	53.9683	82.4185	carbohydrate binding	9.6e-16	90.1	0	14	F:GO:0004888; F:GO:0005537; P:GO:0007165; P:GO:0071353; F:GO:0038024; P:GO:0006898; C:GO:0009986; C:GO:0010008; P:GO:0071346; P:GO:0071222; C:GO:0005623; C:GO:0005887; P:GO:0098657; P:GO:0051704	C:integral component of plasma membrane; C:endosome membrane; P:signal transduction; P:import into cell; F:transmembrane signaling receptor activity; P:receptor-mediated endocytosis; P:cellular response to lipopolysaccharide; P:cellular response to interleukin-4; F:cargo receptor activity; P:cellular response to interferon-gamma; F:mannose binding; C:cell surface; P:multi-organism process; C:obso…	Extracellular	Soluble	OTHER	0.001552
Sma_013552-T1	Hemostasis impairing toxins	153	D2YVH7	C-type lectin mannose-binding isoform (CTL) (Venom C-type lectin mannose-binding isoform 1)	9.95e-20	56.0345	77.0258	P20693	Low affinity immunoglobulin epsilon Fc receptor (Fc-epsilon-RII) (Lymphocyte IgE receptor) (CD antigen CD23)	6.25e-20	55.2632	87.0409	XP_009063154, ESO86195	macrophage mannose receptor 1-like	2.4633e-20	60.3604	97.4413	carbohydrate binding	4.9e-20	104.4	0	0	0	0	Extracellular	Soluble	OTHER	0.001377
Sma_013554-T1	Hemostasis impairing toxins	153	A7X406	C-type lectin lectoxin-Phi1 (CTL)	3.41e-15	51.7857	65.0846	P06027	Echinoidin	1.35e-15	47.2441	72.0182	KAF4093218	aggrecan core protein	2.43994e-16	53.9683	82.4185	carbohydrate binding	9.6e-16	90.1	0	14	F:GO:0004888; F:GO:0005537; P:GO:0007165; P:GO:0071353; F:GO:0038024; P:GO:0006898; C:GO:0009986; C:GO:0010008; P:GO:0071346; P:GO:0071222; C:GO:0005623; C:GO:0005887; P:GO:0098657; P:GO:0051704	C:integral component of plasma membrane; C:endosome membrane; P:signal transduction; P:import into cell; F:transmembrane signaling receptor activity; P:receptor-mediated endocytosis; P:cellular response to lipopolysaccharide; P:cellular response to interleukin-4; F:cargo receptor activity; P:cellular response to interferon-gamma; F:mannose binding; C:cell surface; P:multi-organism process; C:obso…	Extracellular	Soluble	OTHER	0.001552
Sma_013555-T1	Hemostasis impairing toxins	153	D2YVH7	C-type lectin mannose-binding isoform (CTL) (Venom C-type lectin mannose-binding isoform 1)	9.95e-20	56.0345	77.0258	P20693	Low affinity immunoglobulin epsilon Fc receptor (Fc-epsilon-RII) (Lymphocyte IgE receptor) (CD antigen CD23)	6.25e-20	55.2632	87.0409	XP_009063154, ESO86195	macrophage mannose receptor 1-like	2.4633e-20	60.3604	97.4413	carbohydrate binding	4.9e-20	104.4	0	0	0	0	Extracellular	Soluble	OTHER	0.001377
Sma_013557-T1	Hemostasis impairing toxins	153	A7X406	C-type lectin lectoxin-Phi1 (CTL)	3.41e-15	51.7857	65.0846	P06027	Echinoidin	1.35e-15	47.2441	72.0182	KAF4093218	aggrecan core protein	2.43994e-16	53.9683	82.4185	carbohydrate binding	9.6e-16	90.1	0	14	F:GO:0004888; F:GO:0005537; P:GO:0007165; P:GO:0071353; F:GO:0038024; P:GO:0006898; C:GO:0009986; C:GO:0010008; P:GO:0071346; P:GO:0071222; C:GO:0005623; C:GO:0005887; P:GO:0098657; P:GO:0051704	C:integral component of plasma membrane; C:endosome membrane; P:signal transduction; P:import into cell; F:transmembrane signaling receptor activity; P:receptor-mediated endocytosis; P:cellular response to lipopolysaccharide; P:cellular response to interleukin-4; F:cargo receptor activity; P:cellular response to interferon-gamma; F:mannose binding; C:cell surface; P:multi-organism process; C:obso…	Extracellular	Soluble	OTHER	0.001552
Sma_013558-T1	Hemostasis impairing toxins	153	D2YVH7	C-type lectin mannose-binding isoform (CTL) (Venom C-type lectin mannose-binding isoform 1)	9.95e-20	56.0345	77.0258	P20693	Low affinity immunoglobulin epsilon Fc receptor (Fc-epsilon-RII) (Lymphocyte IgE receptor) (CD antigen CD23)	6.25e-20	55.2632	87.0409	XP_009063154, ESO86195	macrophage mannose receptor 1-like	2.4633e-20	60.3604	97.4413	carbohydrate binding	4.9e-20	104.4	0	0	0	0	Extracellular	Soluble	OTHER	0.001377
Sma_013561-T1	Hemostasis impairing toxins	138	C6JUN9	C-type lectin (CTL)	8.8e-16	45.3901	66.2402	P86854	Perlucin-like protein	6.04e-17	55.9633	75.485	XP_009063154, ESO86195	macrophage mannose receptor 1-like isoform X2	9.14644e-18	58.8235	89.3521	carbohydrate binding	7e-18	97.1	0	0	0	0	Extracellular	Soluble	OTHER	0.002349
Sma_013563-T1	Hemostasis impairing toxins	315	A3FM55	C-type lectin 1 (CTL)	1.97e-15	55.8559	69.3218	Q64449	C-type mannose receptor 2 (Lectin lambda) (Macrophage mannose receptor 2) (CD antigen CD280)	2.62e-27	52.5362	115.546	XP_020386037	C-type mannose receptor 2	2.24209e-27	51.0791	124.02	carbohydrate binding	5.3e-29	135.2	0	14	F:GO:0004888; F:GO:0005537; P:GO:0007165; P:GO:0071353; F:GO:0038024; P:GO:0006898; C:GO:0009986; C:GO:0010008; P:GO:0071346; P:GO:0071222; C:GO:0005623; C:GO:0005887; P:GO:0098657; P:GO:0051704	C:integral component of plasma membrane; C:endosome membrane; P:signal transduction; P:import into cell; F:transmembrane signaling receptor activity; P:receptor-mediated endocytosis; P:cellular response to lipopolysaccharide; P:cellular response to interleukin-4; F:cargo receptor activity; P:cellular response to interferon-gamma; F:mannose binding; C:cell surface; P:multi-organism process; C:obso…	Extracellular	Soluble	OTHER	0.001548
Sma_013564-T1	Hemostasis impairing toxins	227	A3FM55	C-type lectin 1 (CTL)	5.58e-17	55.5556	72.0182	P20693	Low affinity immunoglobulin epsilon Fc receptor (Fc-epsilon-RII) (Lymphocyte IgE receptor) (CD antigen CD23)	3.16e-18	56.6038	84.7297	XP_030855792	C-type lectin BfL-2	9.56261e-19	61.8182	95.9005	carbohydrate binding	8e-19	100.9	0	0	0	0	Extracellular	Soluble	SP(Sec/SPI)	0.98524
Sma_013573-T1	Hemostasis impairing toxins	326	Q6X5T3	Snaclec 5 (C-type lectin 5) (CTL-5)	5.46e-11	58.9744	56.6102	Q64449	C-type mannose receptor 2 (Lectin lambda) (Macrophage mannose receptor 2) (CD antigen CD280)	1.7e-14	46.5217	77.7962	XP_033115547	macrophage mannose receptor 1-like	3.42957e-20	44.3548	103.219	carbohydrate binding	9.8e-18	97.8	0	14	F:GO:0004888; F:GO:0005537; P:GO:0007165; P:GO:0071353; F:GO:0038024; P:GO:0006898; C:GO:0009986; C:GO:0010008; P:GO:0071346; P:GO:0071222; C:GO:0005623; C:GO:0005887; P:GO:0098657; P:GO:0051704	C:integral component of plasma membrane; C:endosome membrane; P:signal transduction; P:import into cell; F:transmembrane signaling receptor activity; P:receptor-mediated endocytosis; P:cellular response to lipopolysaccharide; P:cellular response to interleukin-4; F:cargo receptor activity; P:cellular response to interferon-gamma; F:mannose binding; C:cell surface; P:multi-organism process; C:obso…	Extracellular	Soluble	OTHER	0.001135
Sma_013576-T1	Hemostasis impairing toxins	273	D2YVH7	C-type lectin mannose-binding isoform (CTL) (Venom C-type lectin mannose-binding isoform 1)	1.56e-16	51.9685	71.633	P20693	Low affinity immunoglobulin epsilon Fc receptor (Fc-epsilon-RII) (Lymphocyte IgE receptor) (CD antigen CD23)	3.11e-19	55.1402	88.9669	HHC05503	brevican core protein-like	1.71207e-18	61.1111	96.2857	carbohydrate binding	3.1e-17	95.9	0	0	0	0	Extracellular	Soluble	OTHER	0.001641
Sma_013649-T1	Hemostasis impairing toxins	366	D8VNS9	Ryncolin-3	5.63e-64	57.377	204.142	Q29042	Ficolin-1 (Ficolin-A) (Ficolin-alpha)	8.91e-67	60.8696	216.853	EDO46093	ficolin-1 isoform X1	6.11958e-67	63.9269	222.246	chitin binding	7e-49	201.4	0	2	C:GO:0016020; F:GO:0008061	F:chitin binding; C:membrane	Extracellular	Soluble	OTHER	0.034764
Sma_013650-T1	Hemostasis impairing toxins	400	D8VNS9	Ryncolin-3	4.35e-79	59.5156	244.202	Q29042	Ficolin-1 (Ficolin-A) (Ficolin-alpha)	1.86e-86	63.5379	268.47	XP_031746654	ficolin-1-A-like isoform X1	5.34765e-89	62.5455	281.952	chitin binding	8.2e-67	261.2	0	2	C:GO:0016020; F:GO:0008061	F:chitin binding; C:membrane	Extracellular	Soluble	SP(Sec/SPI)	0.751657
Sma_013651-T1	Hemostasis impairing toxins	415	D8VNS9	Ryncolin-3	2.36e-57	56.4854	188.348	Q29042	Ficolin-1 (Ficolin-A) (Ficolin-alpha)	4.53e-57	60.3774	193.356	EDO46093	predicted protein	2.16865e-66	64.8148	222.631	negative regulation of axon extension involved in regeneration	5.4e-45	188.7	0	20	C:GO:0072534; P:GO:0007158; P:GO:0007411; P:GO:0051971; P:GO:0030198; C:GO:0045121; P:GO:0008306; P:GO:0022029; P:GO:0050805; P:GO:0060291; C:GO:0009986; P:GO:0022408; P:GO:0050808; F:GO:0046625; C:GO:0005623; P:GO:0050885; P:GO:0035641; F:GO:0005178; P:GO:0048692; P:GO:0051968	C:perineuronal net; P:long-term synaptic potentiation; P:associative learning; C:membrane raft; F:integrin binding; F:sphingolipid binding; P:positive regulation of synaptic transmission, glutamatergic; P:extracellular matrix organization; P:negative regulation of cell-cell adhesion; C:cell surface; P:negative regulation of axon extension involved in regeneration; P:synapse organization; P:positi…	Extracellular	Soluble	OTHER	0.000876
Sma_013652-T1	Hemostasis impairing toxins	374	D8VNS9	Ryncolin-3	1.97e-77	59.1696	239.195	Q29042	Ficolin-1 (Ficolin-A) (Ficolin-alpha)	1.07e-84	63.5379	263.077	XP_031746654	ficolin-1-A-like isoform X1	5.82779e-86	61.8182	273.092	chitin binding	1.1e-65	257.3	0	2	C:GO:0016020; F:GO:0008061	F:chitin binding; C:membrane	Extracellular	Soluble	SP(Sec/SPI)	0.818466
Sma_013658-T1	Hemostasis impairing toxins	550	D8VNS9	Ryncolin-3	1.89e-69	58.3062	223.787	O70497	Ficolin-2 (Collagen/fibrinogen domain-containing protein 2) (Ficolin-B) (Ficolin-beta) (L-ficolin)	7.29e-80	59.589	256.144	XP_028512828	Ficolin B	4.12052e-79	72.1951	271.937	chitin binding	8.1e-65	255	0	2	C:GO:0016020; F:GO:0008061	F:chitin binding; C:membrane	Extracellular	Soluble	SP(Sec/SPI)	0.819823
Sma_013659-T1	Hemostasis impairing toxins	688	D8VNS8	Ryncolin-2	2.48e-65	67.9426	216.083	Q9U8W8	Techylectin-5A	8.06e-66	65.7277	221.861	XP_020904368	Fibrinogen C domain-containing protein 1	5.37003e-105	53.5792	341.658	Fibrinogen-related domains (FReDs)	4e-69	269.6	0	0	0	0	Extracellular	Soluble	OTHER	0.049848
Sma_013661-T1	Hemostasis impairing toxins	1171	D8VNS9	Ryncolin-3	7.55e-64	65.3846	217.238	Q9U8W7	Techylectin-5B	2.66e-66	67.1429	229.95	XP_015767635	Fibrinogen C domain-containing protein 1	3.01649e-171	48.9776	563.533	Fibrinogen-related domains (FReDs)	8.5e-80	305.8	0	0	0	0	Extracellular	Soluble	SP(Sec/SPI)	0.783357
Sma_013730-T1	Hemostasis impairing toxins	130	C6JUN9	C-type lectin (CTL)	2.13e-17	54.6296	70.0922	Q9UBG0	C-type mannose receptor 2 (C-type lectin domain family 13 member E) (Endocytic receptor 180) (Macrophage mannose receptor 2) (Urokinase-type plasminogen activator receptor-associated protein) (UPAR-associated protein) (Urokinase receptor-associated protein) (CD antigen CD280)	4.52e-20	62.5	87.8113	XP_023560907	low affinity immunoglobulin epsilon Fc receptor isoform X1	1.591e-21	66.0194	97.4413	Low affinity immunoglobulin epsilon Fc	7.8e-19	100.1	0	12	C:GO:0009897; P:GO:0019221; C:GO:0005576; P:GO:0051000; P:GO:0051770; P:GO:0002925; C:GO:0005623; C:GO:0005887; P:GO:0043902; F:GO:0005178; P:GO:0007219; P:GO:0051712	P:positive regulation of killing of cells of other organism; C:integral component of plasma membrane; P:Notch signaling pathway; P:positive regulation of humoral immune response mediated by circulating immunoglobulin; P:positive regulation of nitric-oxide synthase activity; C:external side of plasma membrane; P:positive regulation of multi-organism process; C:obsolete cell; P:cytokine-mediated si…	Extracellular	Soluble	OTHER	0.000698
Sma_013882-T1	Neurotoxin	213	G0LXV8	Alpha-latrotoxin-Lh1a (Alpha-LTX-Lh1a) (Alpha-latrotoxin) (Fragment)	1.94e-11	44.2786	58.9214	Q8MJ50	Osteoclast-stimulating factor 1	2.88e-75	70.7317	228.794	XP_031559692	osteoclast-stimulating factor 1-like	3.37571e-97	82.8283	291.582	SH3 domain binding	3.5e-48	198.4	0	7	P:GO:0043312; C:GO:1904813; C:GO:0034774; C:GO:0005623; P:GO:0007165; P:GO:0001503; F:GO:0017124	P:neutrophil degranulation; C:secretory granule lumen; P:signal transduction; C:obsolete cell; C:ficolin-1-rich granule lumen; P:ossification; F:SH3 domain binding	Cytoplasm	Soluble	OTHER	0.002586
Sma_014294-T1	Hemostasis impairing toxins	570	D8VNS8	Ryncolin-2	4.71e-59	62.0192	196.823	O70497	Ficolin-2 (Collagen/fibrinogen domain-containing protein 2) (Ficolin-B) (Ficolin-beta) (L-ficolin)	7.16e-63	61.0577	212.231	XP_028512828	Fibrinogen C domain-containing protein 1	5.47502e-91	55.0802	303.908	chitin binding	8.9e-59	235	0	2	C:GO:0016020; F:GO:0008061	F:chitin binding; C:membrane	Extracellular	Soluble	OTHER	0.002278
Sma_014354-T1	Hemostasis impairing toxins	497	C6JUN9	C-type lectin (CTL)	1.85e-16	51.3514	73.1738	P86854	Perlucin-like protein	3.26e-19	65.1376	87.8113	XP_022798293	basement membrane-specific heparan sulfate proteoglycan core protein-like	2.63837e-34	48.9914	148.288	carbohydrate binding	4.6e-19	102.8	0	14	F:GO:0004888; F:GO:0005537; P:GO:0007165; P:GO:0071353; F:GO:0038024; P:GO:0006898; C:GO:0009986; C:GO:0010008; P:GO:0071346; P:GO:0071222; C:GO:0005623; C:GO:0005887; P:GO:0098657; P:GO:0051704	C:integral component of plasma membrane; C:endosome membrane; P:signal transduction; P:import into cell; F:transmembrane signaling receptor activity; P:receptor-mediated endocytosis; P:cellular response to lipopolysaccharide; P:cellular response to interleukin-4; F:cargo receptor activity; P:cellular response to interferon-gamma; F:mannose binding; C:cell surface; P:multi-organism process; C:obso…	Cell membrane	Soluble	OTHER	0.001259
Sma_014354-T2	Hemostasis impairing toxins	384	C6JUN9	C-type lectin (CTL)	1.31e-14	51.3514	67.3958	P86854	Perlucin-like protein	2.33e-19	65.1376	87.0409	KXJ25637	basement membrane-specific heparan sulfate proteoglycan core protein-like	9.56867e-34	52.4793	142.51	carbohydrate binding	3.6e-19	102.8	0	14	F:GO:0004888; F:GO:0005537; P:GO:0007165; P:GO:0071353; F:GO:0038024; P:GO:0006898; C:GO:0009986; C:GO:0010008; P:GO:0071346; P:GO:0071222; C:GO:0005623; C:GO:0005887; P:GO:0098657; P:GO:0051704	C:integral component of plasma membrane; C:endosome membrane; P:signal transduction; P:import into cell; F:transmembrane signaling receptor activity; P:receptor-mediated endocytosis; P:cellular response to lipopolysaccharide; P:cellular response to interleukin-4; F:cargo receptor activity; P:cellular response to interferon-gamma; F:mannose binding; C:cell surface; P:multi-organism process; C:obso…	Cell membrane	Soluble	OTHER	0.001798
Sma_014522-T1	Hemostasis impairing toxins	317	D8VNT0	Ryncolin-4	3.42e-41	56.7686	142.895	Q9UQP3	Tenascin-N (TN-N) (Tenascin-W) (TN-W)	2.58e-45	57.0136	167.933	XP_019853465	fibrinogen-like protein A	4.96745e-51	53.6797	180.259	mesenchymal-epithelial cell signaling involved in prostate gland development	7e-45	188	0	16	P:GO:0060739; P:GO:0010628; P:GO:0030198; P:GO:0060740; P:GO:0007528; P:GO:0060447; F:GO:0001968; P:GO:0043687; P:GO:0014012; C:GO:0005623; C:GO:0005788; P:GO:0007162; P:GO:0008284; C:GO:0005614; F:GO:0045545; C:GO:0005604	P:prostate gland epithelium morphogenesis; C:interstitial matrix; P:mesenchymal-epithelial cell signaling involved in prostate gland development; C:basement membrane; C:endoplasmic reticulum lumen; P:negative regulation of cell adhesion; P:positive regulation of cell population proliferation; F:syndecan binding; P:bud outgrowth involved in lung branching; P:extracellular matrix organization; P:po…	Extracellular	Soluble	SP(Sec/SPI)	0.965591
Sma_014937-T1	Cysteine-rich Proteins	953	Q2XXQ4	Cysteine-rich venom protein DIS3 (CRVP) (Cysteine-rich secretory protein DIS3) (CRISP-DIS3)	1.18e-12	47.1014	65.0846	A2AJX4	MAM and LDL-receptor class A domain-containing protein 1	3.73e-27	42.2374	123.25	XP_031568761	zinc metalloproteinase nas-14-like	4.35927e-45	48.2659	189.504	MAM domain, meprin/A5/mu	8.8e-35	156	0	0	0	0	Cell membrane	Membrane	OTHER	0.038489
Sma_015170-T1	Protease Inhibitors	1703	W4VSH9	Kunitz-type U19-barytoxin-Tl1a (U19-BATX-Tl1a) (Kunitz-type serine protease inhibitor Kunitz-1)	7.9e-20	43.4286	85.1149	Q2KMM2, Q5NCF2	Trafficking protein particle complex subunit 1	9.52e-54	82.3944	187.963	NP_001267819, AAO60428	trafficking protein particle complex subunit 1-like	1.04858e-60	40.8873	241.121	von Willebrand factor type C domain	8.5e-89	336.3	0	0	0	0	Extracellular	Soluble	SP(Sec/SPI)	0.999376
Sma_015367-T1	Other toxins	209	M5B4R7	Translationally-controlled tumor protein homolog (GTx-TCTP1)	4.78e-30	54.5977	105.916	Q95VY2	Translationally-controlled tumor protein homolog (TCTP)	3.21e-33	57.8947	120.168	XP_017856263	translationally-controlled tumor protein homolog	3.87523e-34	61.1429	129.798	positive regulation of histone phosphorylation	9.6e-27	127.1	0	16	P:GO:0006302; P:GO:2000736; P:GO:0031573; F:GO:0008017; P:GO:0065009; P:GO:0071480; F:GO:0005509; P:GO:0040018; P:GO:0045793; C:GO:0005623; C:GO:0005634; C:GO:0005700; P:GO:0007095; C:GO:0005737; F:GO:0005085; P:GO:0033129	F:guanyl-nucleotide exchange factor activity; P:mitotic G2 DNA damage checkpoint; P:regulation of molecular function; C:cytoplasm; P:double-strand break repair; P:intra-S DNA damage checkpoint; C:polytene chromosome; P:positive regulation of histone phosphorylation; F:calcium ion binding; P:regulation of stem cell differentiation; C:obsolete cell; P:positive regulation of cell size; C:nucleus; P:…	Cytoplasm	Soluble	OTHER	0.00161
Sma_015374-T1	Other toxins	358	Q75WF2	Plancitoxin-1 (EC 3.1.22.1) (Plancitoxin I) (Plan-I) [Cleaved into: Plancitoxin-1 subunit alpha; Plancitoxin-1 subunit beta]	4.14e-84	56.25	256.144	Q75WF2	Plancitoxin-1 (EC 3.1.22.1) (Plancitoxin I) (Plan-I) [Cleaved into: Plancitoxin-1 subunit alpha; Plancitoxin-1 subunit beta]	9.8e-82	56.25	256.144	XP_012559658	plancitoxin-1 isoform X1	2.046e-104	66.1491	320.087	deoxyribonuclease II activity	9.2e-86	323.9	EC:3.1.22.1	6	P:GO:0045476; F:GO:0004531; C:GO:0005764; C:GO:0005623; C:GO:0005634; P:GO:0006309	P:nurse cell apoptotic process; C:obsolete cell; P:apoptotic DNA fragmentation; C:nucleus; F:deoxyribonuclease II activity; C:lysosome	Extracellular	Soluble	SP(Sec/SPI)	0.998472
Sma_015421-T1	Neurotoxin	521	Q02989	Alpha-latroinsectotoxin-Lt1a (Alpha-LIT-Lt1a) (Alpha-latroinsectotoxin) (Alpha-LIT) (Fragment)	2.58e-25	47.5884	106.686	O54910	NF-kappa-B inhibitor epsilon (NF-kappa-BIE) (I-kappa-B-epsilon) (IkB-E) (IkB-epsilon) (IkappaBepsilon)	1.11e-34	53.5398	137.117	XP_020614015	NF-kappa-B inhibitor epsilon	2.54446e-41	57.7075	163.31	B-cell CLL lymphoma 3	8.3e-11	75.5	0	42	F:GO:0003700; P:GO:0051101; P:GO:0002315; P:GO:0002455; P:GO:0007249; P:GO:0046426; P:GO:0045415; C:GO:0030496; P:GO:0042742; C:GO:0005654; C:GO:0032996; P:GO:0045892; P:GO:0042088; P:GO:0032729; F:GO:0008134; P:GO:0051704; F:GO:0003677; P:GO:1901222; P:GO:1902532; F:GO:0030674; P:GO:0030198; P:GO:0030330; P:GO:0006606; P:GO:0042832; P:GO:0045727; P:GO:0045944; P:GO:0009615; P:GO:0002268; P:GO:00…	P:negative regulation of transcription, DNA-templated; P:negative regulation of receptor signaling pathway via JAK-STAT; P:response to UV-C; P:follicular dendritic cell differentiation; P:marginal zone B cell differentiation; P:response to virus; P:positive regulation of translation; P:defense response to protozoan; P:negative regulation of intracellular signal transduction; F:DNA-binding transcr…	Cytoplasm	Soluble	OTHER	0.001155
Sma_016645-T1	Hemostasis impairing toxins	812	Q58L90	Venom prothrombin activator omicarin-C non-catalytic subunit (vPA) (Venom coagulation factor Va-like protein) [Cleaved into: Omicarin-C non-catalytic subunit heavy chain; Omicarin-C non-catalytic subunit light chain]	7.74e-17	51.6556	81.6481	Q9V3J1	V-type proton ATPase subunit H (V-ATPase subunit H) (Vacuolar proton pump subunit H) (Vacuolar proton pump subunit SFD)	3.65e-161	71.167	479.559	XP_002169636	V-type proton ATPase subunit H isoform X2	0	78.9954	554.288	proton-transporting ATPase activity, rotational mechanism	5.6e-147	528.5	0	22	P:GO:0050690; P:GO:0033227; P:GO:0050790; P:GO:0007035; F:GO:0030234; C:GO:0033181; P:GO:0008286; P:GO:0033572; C:GO:0000221; P:GO:0006897; P:GO:0072512; C:GO:0005765; P:GO:0016241; C:GO:0005623; P:GO:0098657; P:GO:0008340; P:GO:0015988; F:GO:0046961; F:GO:0008553; F:GO:0043492; P:GO:0051704; C:GO:0005829	F:ATPase activity, coupled to movement of substances; F:proton-exporting ATPase activity, phosphorylative mechanism; P:energy coupled proton transmembrane transport, against electrochemical gradient; P:import into cell; P:dsRNA transport; C:vacuolar proton-transporting V-type ATPase, V1 domain; P:trivalent inorganic cation transport; C:cytosol; C:plasma membrane proton-transporting V-type ATPase …	Cytoplasm	Soluble	OTHER	0.001565
Sma_016817-T1	Other toxins	677	A8QL51	L-amino-acid oxidase (Bm-LAAO) (LAO) (EC 1.4.3.2)	5.88e-11	44.127	61.2326	Q8CIG3	Lysine-specific histone demethylase 1B (EC 1.14.99.66) (Flavin-containing amine oxidase domain-containing protein 1) (Lysine-specific histone demethylase 2)	8.54e-169	58.7393	506.908	XP_012555617	lysine-specific histone demethylase 1B isoform X1	0	66.2939	562.762	histone demethylase activity (H3-monomethyl-K4 specific)	6.1e-155	554.7	0	14	P:GO:0055114; F:GO:0034649; P:GO:0034720; C:GO:0000786; F:GO:0034648; P:GO:0006349; F:GO:0071949; F:GO:0008270; C:GO:0005654; P:GO:0043046; C:GO:0005623; P:GO:0044030; F:GO:0042393; P:GO:0016579	C:nucleosome; P:histone H3-K4 demethylation; P:protein deubiquitination; P:oxidation-reduction process; F:zinc ion binding; F:histone binding; F:histone demethylase activity (H3-monomethyl-K4 specific); P:DNA methylation involved in gamete generation; F:histone demethylase activity (H3-dimethyl-K4 specific); C:obsolete cell; F:FAD binding; P:regulation of gene expression by genetic imprinting; P:…	Nucleus	Soluble	OTHER	0.00625
Sma_017130-T1	Proteases	1312	P0DM62	Astacin-like metalloprotease toxin 5 (EC 3.4.24.-) (Loxosceles astacin-like protease 5) (LALP5) (Fragment)	1.99e-16	47.8528	75.0998	P52272	Heterogeneous nuclear ribonucleoprotein M (hnRNP M)	1.07e-31	57.6577	137.117	XP_031568759	MAM and LDL-receptor class A domain-containing protein 2-like	1.66954e-92	55.3097	326.635	Heterogeneous nuclear ribonucleoprotein M	3.4e-37	164.5	0	20	P:GO:0000380; P:GO:0008543; C:GO:0042382; C:GO:0035062; P:GO:0007277; F:GO:0003730; P:GO:1990831; C:GO:0000790; F:GO:1990405; C:GO:0009986; F:GO:0019904; P:GO:0071222; C:GO:0005623; F:GO:0048306; P:GO:0045451; C:GO:0005737; C:GO:0071013; P:GO:1900182; P:GO:1904591; C:GO:0016363	P:positive regulation of protein localization to nucleus; F:protein antigen binding; F:protein domain specific binding; P:fibroblast growth factor receptor signaling pathway; C:cytoplasm; C:catalytic step 2 spliceosome; P:cellular response to lipopolysaccharide; P:alternative mRNA splicing, via spliceosome; P:pole plasm oskar mRNA localization; C:omega speckle; C:nuclear matrix; F:mRNA 3'-UTR bin…	Nucleus	Soluble	OTHER	0.000547
Sma_017501-T1	Neurotoxin	314	Q25338	Delta-latroinsectotoxin-Lt1a (Delta-LIT-Lt1a) (Delta-latroinsectotoxin) (Delta-LIT)	5.97e-12	47.651	62.7734	Q00653	Nuclear factor NF-kappa-B p100 subunit (DNA-binding factor KBF2) (H2TF1) (Lymphocyte translocation chromosome 10 protein) (Nuclear factor of kappa light polypeptide gene enhancer in B-cells 2) (Oncogene Lyt-10) (Lyt10) [Cleaved into: Nuclear factor NF-kappa-B p52 subunit]	1.49e-30	53.7778	124.79	XP_028396366	NF-kappa-B inhibitor epsilon	5.15802e-36	56.9444	144.436	Nuclear factor NF-kappa-B p105 subunit	4.4e-23	115.5	0	70	P:GO:0002230; P:GO:1900127; P:GO:2000637; P:GO:0032481; C:GO:0043005; P:GO:0007249; P:GO:0046688; C:GO:0005576; C:GO:0005654; P:GO:0051403; P:GO:0008063; P:GO:0035994; C:GO:0035580; P:GO:2000630; C:GO:0005739; F:GO:0051059; P:GO:1902895; P:GO:0032375; P:GO:1904632; P:GO:0034198; P:GO:0043902; P:GO:0000122; P:GO:0071260; P:GO:0002223; C:GO:0033256; P:GO:0043066; P:GO:0070498; P:GO:0071222; P:GO:00…	P:cellular response to tumor necrosis factor; C:extracellular region; P:negative regulation of inflammatory response; P:positive regulation of miRNA metabolic process; C:nuclear euchromatin; P:membrane protein intracellular domain proteolysis; P:cellular response to mechanical stimulus; P:response to muscle stretch; P:dendrite morphogenesis; P:negative regulation of interleukin-12 biosynthetic pr…	Cytoplasm	Soluble	OTHER	0.000764
Sma_017506-T1	Hemostasis impairing toxins	1089	Q58L91	Venom prothrombin activator oscutarin-C non-catalytic subunit (vPA) (Venom coagulation factor Va-like protein) [Cleaved into: Oscutarin-C non-catalytic subunit heavy chain; Oscutarin-C non-catalytic subunit light chain]	4.71e-22	53.75	99.3673	P12263	Coagulation factor VIII (Procoagulant component)	1.64e-22	57.5758	108.612	XP_028396959	predicted protein	2.88222e-55	46.8354	221.476	Milk fat globule-EGF factor 8 protein	3.6e-24	120.9	0	17	F:GO:0008429; C:GO:0019897; F:GO:0001786; P:GO:0045807; P:GO:0043627; P:GO:0006910; P:GO:0006911; C:GO:0009897; P:GO:0043687; P:GO:0043277; C:GO:0005623; C:GO:0005788; P:GO:0098657; P:GO:0008284; F:GO:0005178; C:GO:0005615; P:GO:0050766	C:endoplasmic reticulum lumen; F:phosphatidylserine binding; C:extracellular space; C:external side of plasma membrane; P:response to estrogen; P:positive regulation of cell population proliferation; P:import into cell; F:integrin binding; P:positive regulation of endocytosis; P:positive regulation of phagocytosis; P:apoptotic cell clearance; C:extrinsic component of plasma membrane; P:post-trans…	Cytoplasm	Soluble	OTHER	0.000385
Sma_017573-T1	Hemostasis impairing toxins	2951	C6JUN9	C-type lectin (CTL)	5.43e-20	51.4925	85.5001	P22897	Macrophage mannose receptor 1 (MMR) (C-type lectin domain family 13 member D) (C-type lectin domain family 13 member D-like) (Human mannose receptor) (hMR) (Macrophage mannose receptor 1-like protein 1) (CD antigen CD206)	6.56e-25	47.8927	118.242	XP_012553683	PREDICTED: uncharacterized protein LOC100203426 isoform X4	0	79.2019	2300.4	detection of mechanical stimulus	0	1070.5	EC:2.3.2.13	0	0	0	Extracellular	Soluble	OTHER	0.001757
Sma_017634-T1	Hemostasis impairing toxins	2822	Q58L91	Venom prothrombin activator oscutarin-C non-catalytic subunit (vPA) (Venom coagulation factor Va-like protein) [Cleaved into: Oscutarin-C non-catalytic subunit heavy chain; Oscutarin-C non-catalytic subunit light chain]	2.39e-32	47.3829	134.806	O43854	EGF-like repeat and discoidin I-like domain-containing protein 3 (Developmentally-regulated endothelial cell locus 1 protein) (Integrin-binding protein DEL1)	4.97e-33	45.0135	139.428	XP_012559271	PREDICTED: uncharacterized protein LOC100200237	0	79.5193	1372.07	biological adhesion	0	1568.1	0	0	0	0	Extracellular	Soluble	OTHER	0.002346
Sma_017692-T1	Other toxins	437	Q5BLY5	Venom acid phosphatase Acph-1 (EC 3.1.3.2) (allergen Api m 3)	4.74e-46	50.2874	160.229	B1H1P9	Lysosomal acid phosphatase (LAP) (EC 3.1.3.2)	9.04e-105	59.4595	320.472	XP_028650169	lysosomal acid phosphatase	8.72702e-105	61.2987	327.405	Belongs to the histidine acid phosphatase family	1.9e-85	323.2	EC:3.1.3.5; EC:3.1.3.2	14	C:GO:0016021; F:GO:0004721; C:GO:0043202; P:GO:0007268; F:GO:0003993; F:GO:0001784; P:GO:0001501; C:GO:0043005; C:GO:0031410; C:GO:0005623; P:GO:0010033; P:GO:0048102; P:GO:0006470; P:GO:0007040	F:acid phosphatase activity; P:chemical synaptic transmission; P:response to organic substance; P:protein dephosphorylation; C:neuron projection; P:lysosome organization; F:phosphotyrosine residue binding; C:obsolete cell; F:phosphoprotein phosphatase activity; C:cytoplasmic vesicle; C:integral component of membrane; P:autophagic cell death; C:lysosomal lumen; P:skeletal system development	Cell membrane	Membrane	SP(Sec/SPI)	0.974456
Sma_018621-T1	Hemostasis impairing toxins	498	C6JUN9	C-type lectin (CTL)	1.23e-18	52.2523	79.337	Q9UBG0	C-type mannose receptor 2 (C-type lectin domain family 13 member E) (Endocytic receptor 180) (Macrophage mannose receptor 2) (Urokinase-type plasminogen activator receptor-associated protein) (UPAR-associated protein) (Urokinase receptor-associated protein) (CD antigen CD280)	1.6e-18	66.3636	92.8189	XP_031552111, XP_031552120	Peroxidasin-like protein	2.49257e-34	53.3865	148.288	C-type mannose receptor 2	9.3e-20	105.1	0	8	C:GO:0009986; F:GO:0004888; P:GO:0030574; F:GO:0030246; C:GO:0005623; C:GO:0005887; P:GO:0007165; F:GO:0005518	C:integral component of plasma membrane; P:collagen catabolic process; C:cell surface; P:signal transduction; F:carbohydrate binding; C:obsolete cell; F:transmembrane signaling receptor activity; F:collagen binding	Cell membrane	Soluble	OTHER	0.006876
Sma_018667-T1	Proteases	392	Q805F4	Zinc metalloproteinase/disintegrin [Cleaved into: Snake venom metalloproteinase (SVMP) (EC 3.4.24.-); Disintegrin piscivostatin-beta (PVS-beta)]	2.51e-16	48.1481	76.6406	Q9UKP4	A disintegrin and metalloproteinase with thrombospondin motifs 7 (ADAM-TS 7) (ADAM-TS7) (ADAMTS-7) (EC 3.4.24.-) (COMPase)	1.69e-85	58.5014	286.96	KFM69025	A disintegrin and metalloproteinase with thrombospondin motifs 7	3.87459e-91	59.6491	288.886	A disintegrin and metalloproteinase with thrombospondin motifs 7	2.4e-79	302.8	0	10	C:GO:0009986; P:GO:0071347; P:GO:0042059; P:GO:0071356; P:GO:0032331; F:GO:0004222; C:GO:0005623; C:GO:0005788; P:GO:0071773; P:GO:0051603	C:endoplasmic reticulum lumen; P:cellular response to BMP stimulus; P:proteolysis involved in cellular protein catabolic process; F:metalloendopeptidase activity; C:cell surface; P:cellular response to tumor necrosis factor; C:obsolete cell; P:cellular response to interleukin-1; P:negative regulation of epidermal growth factor receptor signaling pathway; P:negative regulation of chondrocyte diffe…	Extracellular	Soluble	SP(Sec/SPI)	0.705894
Sma_018700-T1	Neurotoxin	168	Q25338	Delta-latroinsectotoxin-Lt1a (Delta-LIT-Lt1a) (Delta-latroinsectotoxin) (Delta-LIT)	4.04e-16	54.2373	71.2478	Q0P5B9	Ankyrin repeat domain-containing protein 39	4.26e-46	65.6627	151.754	XP_029184311	Ankyrin repeat domain-containing protein 39	8.4476e-54	70.625	178.718	Ankyrin repeat	1.4e-23	116.3	0	0	0	0	Nucleus	Soluble	OTHER	0.001082
Sma_018842-T1	Hemostasis impairing toxins	331	D8VNS7	Ryncolin-1	2.09e-39	57.5342	138.658	P57756	Ficolin-2 (Collagen/fibrinogen domain-containing protein 2) (Ficolin-B) (Ficolin-beta) (L-ficolin)	1.79e-41	56.2791	149.828	XP_028418010	microfibril-associated glycoprotein 4-like	3.19368e-48	58.4746	173.711	negative regulation of axon extension involved in regeneration	1.2e-39	170.6	0	20	C:GO:0072534; P:GO:0007158; P:GO:0007411; P:GO:0051971; P:GO:0030198; C:GO:0045121; P:GO:0008306; P:GO:0022029; P:GO:0050805; P:GO:0060291; C:GO:0009986; P:GO:0022408; P:GO:0050808; F:GO:0046625; C:GO:0005623; P:GO:0050885; P:GO:0035641; F:GO:0005178; P:GO:0048692; P:GO:0051968	C:perineuronal net; P:long-term synaptic potentiation; P:associative learning; C:membrane raft; F:integrin binding; F:sphingolipid binding; P:positive regulation of synaptic transmission, glutamatergic; P:extracellular matrix organization; P:negative regulation of cell-cell adhesion; C:cell surface; P:negative regulation of axon extension involved in regeneration; P:synapse organization; P:positi…	Extracellular	Soluble	SP(Sec/SPI)	0.809087
Sma_018968-T1	Hemostasis impairing toxins	695	D8VNT0	Ryncolin-4	5.43e-39	58.0189	144.05	Q9NYT6	Zinc finger protein 226	4.37e-50	57.3333	190.66	XP_027048599, RMX42024	zinc finger protein OZF-like	3.49482e-99	71.1111	320.857	chitin binding	5.6e-47	196.1	0	2	C:GO:0016020; F:GO:0008061	F:chitin binding; C:membrane	Nucleus	Soluble	OTHER	0.000636
Sma_018969-T1	Hemostasis impairing toxins	320	D8VNS7	Ryncolin-1	9.99e-45	57.754	152.525	P57756	Ficolin-2 (Collagen/fibrinogen domain-containing protein 2) (Ficolin-B) (Ficolin-beta) (L-ficolin)	1.33e-46	52.8384	162.925	XP_019855863	microfibril-associated glycoprotein 4-like	1.05543e-51	57.7273	182.185	mesenchymal-epithelial cell signaling involved in prostate gland development	3.7e-46	192.2	0	16	P:GO:0060739; P:GO:0010628; P:GO:0030198; P:GO:0060740; P:GO:0007528; P:GO:0060447; F:GO:0001968; P:GO:0043687; P:GO:0014012; C:GO:0005623; C:GO:0005788; P:GO:0007162; P:GO:0008284; C:GO:0005614; F:GO:0045545; C:GO:0005604	P:prostate gland epithelium morphogenesis; C:interstitial matrix; P:mesenchymal-epithelial cell signaling involved in prostate gland development; C:basement membrane; C:endoplasmic reticulum lumen; P:negative regulation of cell adhesion; P:positive regulation of cell population proliferation; F:syndecan binding; P:bud outgrowth involved in lung branching; P:extracellular matrix organization; P:po…	Extracellular	Soluble	SP(Sec/SPI)	0.954632
Sma_019004-T1	Proteases	1233	A0FKN6	Astacin-like metalloprotease toxin 1 (EC 3.4.24.-) (Loxosceles astacin-like protease 1) (LALP) (LALP1)	4.58e-30	57.6471	117.087	P0C865	Mitogen-activated protein kinase 7 (MAP kinase 7) (MAPK 7) (EC 2.7.11.24) (Big MAP kinase 1) (BMK-1) (Extracellular signal-regulated kinase 5) (ERK-5)	1.15e-143	75.4286	457.988	ARJ54257	mitogen-activated protein kinase 7-like	0	75.819	791.186	negative regulation of ERK5 cascade	7e-133	482.3	EC:2.7.11.24	26	F:GO:0005524; P:GO:0051344; P:GO:0070885; C:GO:0016605; P:GO:0071499; P:GO:0070301; P:GO:2001240; P:GO:1902176; P:GO:0036003; P:GO:2000352; P:GO:0051247; P:GO:0007411; P:GO:0034115; F:GO:0051019; P:GO:0060761; P:GO:0043407; F:GO:0004707; P:GO:0071560; P:GO:0050728; P:GO:0018105; P:GO:0045765; P:GO:0046777; P:GO:0070377; C:GO:0005623; P:GO:0019933; C:GO:0005829	P:cellular response to transforming growth factor beta stimulus; P:negative regulation of ERK5 cascade; P:negative regulation of cyclic-nucleotide phosphodiesterase activity; P:negative regulation of inflammatory response; C:cytosol; P:cellular response to laminar fluid shear stress; P:positive regulation of transcription from RNA polymerase II promoter in response to stress; P:protein autophosph…	Cytoplasm	Soluble	OTHER	0.000564
Sma_019052-T1	Hemostasis impairing toxins	324	D8VNS8	Ryncolin-2	5.93e-45	60	153.295	Q05546	Tenascin-R (TN-R) (Janusin) (Neural recognition molecule J1-160/180) (Restrictin)	8.57e-48	54.4601	175.637	XP_015762046	microfibril-associated glycoprotein 4-like	1.9218e-52	60.9302	181.8	negative regulation of axon extension involved in regeneration	2.2e-46	193	0	20	C:GO:0072534; P:GO:0007158; P:GO:0007411; P:GO:0051971; P:GO:0030198; C:GO:0045121; P:GO:0008306; P:GO:0022029; P:GO:0050805; P:GO:0060291; C:GO:0009986; P:GO:0022408; P:GO:0050808; F:GO:0046625; C:GO:0005623; P:GO:0050885; P:GO:0035641; F:GO:0005178; P:GO:0048692; P:GO:0051968	C:perineuronal net; P:long-term synaptic potentiation; P:associative learning; C:membrane raft; F:integrin binding; F:sphingolipid binding; P:positive regulation of synaptic transmission, glutamatergic; P:extracellular matrix organization; P:negative regulation of cell-cell adhesion; C:cell surface; P:negative regulation of axon extension involved in regeneration; P:synapse organization; P:positi…	Extracellular	Soluble	SP(Sec/SPI)	0.810791
Sma_019066-T1	Hemostasis impairing toxins	210	D2YVH7	C-type lectin mannose-binding isoform (CTL) (Venom C-type lectin mannose-binding isoform 1)	3.94e-18	53.913	74.3294	P20693	Low affinity immunoglobulin epsilon Fc receptor (Fc-epsilon-RII) (Lymphocyte IgE receptor) (CD antigen CD23)	1.87e-20	55.0459	90.5077	XP_009063154, ESO86195	Fc receptor, IgE, low affinity II, alpha polypeptide	9.4556e-19	55.8559	95.1301	Low affinity immunoglobulin epsilon Fc	1.1e-17	97.1	0	12	C:GO:0009897; P:GO:0019221; C:GO:0005576; P:GO:0051000; P:GO:0051770; P:GO:0002925; C:GO:0005623; C:GO:0005887; P:GO:0043902; F:GO:0005178; P:GO:0007219; P:GO:0051712	P:positive regulation of killing of cells of other organism; C:integral component of plasma membrane; P:Notch signaling pathway; P:positive regulation of humoral immune response mediated by circulating immunoglobulin; P:positive regulation of nitric-oxide synthase activity; C:external side of plasma membrane; P:positive regulation of multi-organism process; C:obsolete cell; P:cytokine-mediated si…	Extracellular	Soluble	SP(Sec/SPI)	0.955639
Sma_019144-T1	Hemostasis impairing toxins	1076	Q7SZN0	Venom prothrombin activator pseutarin-C non-catalytic subunit (PCNS) (vPA) (Venom coagulation factor Va-like protein) [Cleaved into: Pseutarin-C non-catalytic subunit heavy chain; Pseutarin-C non-catalytic subunit light chain]	1.32e-119	52.2857	397.897	B3EWZ9	Hephaestin-like protein (EC 1.-.-.-)	0	63.4191	1013.83	XP_022788227	hephaestin-like protein	0	63.4328	1017.3	oxidoreductase activity, oxidizing metal ions, oxygen as acceptor	9e-278	963.4	EC:1.16.3.1	20	P:GO:0055114; P:GO:0007584; F:GO:0004322; C:GO:0046658; P:GO:0006826; P:GO:0006879; F:GO:0005507; P:GO:0007568; F:GO:0051087; P:GO:0046688; P:GO:0043687; P:GO:0001889; C:GO:0048471; C:GO:0005623; C:GO:0005788; P:GO:0015679; C:GO:0005615; C:GO:0016323; F:GO:0008198; P:GO:0030324	P:aging; C:anchored component of plasma membrane; P:iron ion transport; C:endoplasmic reticulum lumen; P:liver development; F:ferrous iron binding; C:extracellular space; P:oxidation-reduction process; P:plasma membrane copper ion transport; C:perinuclear region of cytoplasm; F:chaperone binding; P:lung development; F:copper ion binding; C:basolateral plasma membrane; F:ferroxidase activity; P:po…	Extracellular	Soluble	SP(Sec/SPI)	0.833406
Sma_020487-T1	Other toxins	657	J3S820	Hyaluronidase (EC 3.2.1.35) (Hyaluronoglucosaminidase) (Venom spreading factor)	5.11e-81	55.4707	260.381	Q812F3	Hyaluronidase-5 (Hyal-5) (EC 3.2.1.35) (Hyaluronoglucosaminidase-5)	4.11e-85	60.2817	279.641	XP_020902926	hyaluronidase-1-like isoform X1	2.36666e-148	55.5732	455.292	positive regulation of hyaluranon cable assembly	1e-119	437.6	EC:3.2.1.35	3	C:GO:0005576; P:GO:0030207; F:GO:0015929	C:extracellular region; P:chondroitin sulfate catabolic process; F:hexosaminidase activity	Cell membrane	Membrane	SP(Sec/SPI)	0.737525
Sma_020498-T1	Proteases	743	W4VS99	Neprilysin-1 (EC 3.4.24.-)	1.15e-129	51.3043	398.667	Q4PZA2	Endothelin-converting enzyme 1 (ECE-1) (EC 3.4.24.71)	6.08e-177	58.6765	528.48	NP_001296678, AAD46624	endothelin-converting enzyme homolog isoform X1	0	73.5513	750.74	Metalloendopeptidase activity. It is involved in the biological process described with proteolysis	2.4e-181	642.5	EC:3.4.24.71	0	0	0	Plastid	Soluble	OTHER	0.002993
Sma_020709-T1	Hemostasis impairing toxins	302	D8VNT0	Ryncolin-4	2.17e-42	59.0164	145.591	Q7ZT72	Ficolin-1-B	2.96e-44	59.901	155.992	XP_019853465	fibrinogen C domain-containing protein 1-like	1.78452e-48	58.794	173.326	mesenchymal-epithelial cell signaling involved in prostate gland development	3.3e-44	185.7	0	16	P:GO:0060739; P:GO:0010628; P:GO:0030198; P:GO:0060740; P:GO:0007528; P:GO:0060447; F:GO:0001968; P:GO:0043687; P:GO:0014012; C:GO:0005623; C:GO:0005788; P:GO:0007162; P:GO:0008284; C:GO:0005614; F:GO:0045545; C:GO:0005604	P:prostate gland epithelium morphogenesis; C:interstitial matrix; P:mesenchymal-epithelial cell signaling involved in prostate gland development; C:basement membrane; C:endoplasmic reticulum lumen; P:negative regulation of cell adhesion; P:positive regulation of cell population proliferation; F:syndecan binding; P:bud outgrowth involved in lung branching; P:extracellular matrix organization; P:po…	Extracellular	Soluble	OTHER	0.001626
Sma_020738-T1	Hemostasis impairing toxins	641	D8VNT0	Ryncolin-4	2.28e-47	54.9296	166.777	Q6AX44	Fibrinogen C domain-containing protein 1-A	8.19e-49	59.3607	180.259	XP_020904368	angiopoietin-related protein 7	2.67544e-87	51.9507	294.278	chitin binding	2.2e-53	217.2	0	2	C:GO:0016020; F:GO:0008061	F:chitin binding; C:membrane	Extracellular	Soluble	OTHER	0.005108
Sma_020774-T1	Hemostasis impairing toxins	224	D8VNT0	Ryncolin-4	1.81e-29	59.2105	108.997	Q29116	Tenascin (TN) (Cytotactin) (GMEM) (GP 150-225) (Glioma-associated-extracellular matrix antigen) (Hexabrachion) (JI) (Myotendinous antigen) (Neuronectin) (P230) (Tenascin-C) (TN-C)	1.31e-31	54.878	124.79	XP_008107215	fibrinogen C domain-containing protein 1-like	9.88278e-35	64.7059	135.961	chitin binding	3.1e-31	142.1	0	2	C:GO:0016020; F:GO:0008061	F:chitin binding; C:membrane	Extracellular	Soluble	OTHER	0.00279
Sma_020778-T1	Hemostasis impairing toxins	314	D8VNT0	Ryncolin-4	5.37e-48	58.8496	160.999	Q9UQP3	Tenascin-N (TN-N) (Tenascin-W) (TN-W)	2.73e-50	60.0897	182.185	XP_019853465	microfibril-associated glycoprotein 4-like	3.37362e-57	55.1724	196.052	mesenchymal-epithelial cell signaling involved in prostate gland development	6.5e-51	208	0	16	P:GO:0060739; P:GO:0010628; P:GO:0030198; P:GO:0060740; P:GO:0007528; P:GO:0060447; F:GO:0001968; P:GO:0043687; P:GO:0014012; C:GO:0005623; C:GO:0005788; P:GO:0007162; P:GO:0008284; C:GO:0005614; F:GO:0045545; C:GO:0005604	P:prostate gland epithelium morphogenesis; C:interstitial matrix; P:mesenchymal-epithelial cell signaling involved in prostate gland development; C:basement membrane; C:endoplasmic reticulum lumen; P:negative regulation of cell adhesion; P:positive regulation of cell population proliferation; F:syndecan binding; P:bud outgrowth involved in lung branching; P:extracellular matrix organization; P:po…	Extracellular	Soluble	SP(Sec/SPI)	0.991753
Sma_020780-T1	Hemostasis impairing toxins	215	D8VNT0	Ryncolin-4	8.56e-45	62.7119	149.058	Q92752	Tenascin-R (TN-R) (Janusin) (Restrictin)	1.74e-47	56.7442	170.244	XP_019853465	fibrinogen C domain-containing protein 1-like	8.0345e-50	59.2417	173.326	negative regulation of axon extension involved in regeneration	1.1e-44	186.8	0	20	C:GO:0072534; P:GO:0007158; P:GO:0007411; P:GO:0051971; P:GO:0030198; C:GO:0045121; P:GO:0008306; P:GO:0022029; P:GO:0050805; P:GO:0060291; C:GO:0009986; P:GO:0022408; P:GO:0050808; F:GO:0046625; C:GO:0005623; P:GO:0050885; P:GO:0035641; F:GO:0005178; P:GO:0048692; P:GO:0051968	C:perineuronal net; P:long-term synaptic potentiation; P:associative learning; C:membrane raft; F:integrin binding; F:sphingolipid binding; P:positive regulation of synaptic transmission, glutamatergic; P:extracellular matrix organization; P:negative regulation of cell-cell adhesion; C:cell surface; P:negative regulation of axon extension involved in regeneration; P:synapse organization; P:positi…	Extracellular	Soluble	OTHER	0.002342
Sma_020781-T1	Hemostasis impairing toxins	372	D8VNT0	Ryncolin-4	9.31e-44	58.371	151.369	Q95LU3	Fibrinogen C domain-containing protein 1	5.18e-48	49.1409	171.014	XP_019853465	microfibril-associated glycoprotein 4-like	4.64119e-52	58.7963	184.882	signaling receptor binding	4.6e-48	198.7	0	0	0	0	Extracellular	Soluble	OTHER	0.000616
Sma_020784-T1	Hemostasis impairing toxins	314	D8VNT0	Ryncolin-4	1.56e-45	56.3877	154.451	Q9UQP3	Tenascin-N (TN-N) (Tenascin-W) (TN-W)	4.09e-50	60.2679	181.8	XP_019853465	microfibril-associated glycoprotein 4-like	2.14512e-53	57.2052	186.422	mesenchymal-epithelial cell signaling involved in prostate gland development	1.5e-47	196.8	0	16	P:GO:0060739; P:GO:0010628; P:GO:0030198; P:GO:0060740; P:GO:0007528; P:GO:0060447; F:GO:0001968; P:GO:0043687; P:GO:0014012; C:GO:0005623; C:GO:0005788; P:GO:0007162; P:GO:0008284; C:GO:0005614; F:GO:0045545; C:GO:0005604	P:prostate gland epithelium morphogenesis; C:interstitial matrix; P:mesenchymal-epithelial cell signaling involved in prostate gland development; C:basement membrane; C:endoplasmic reticulum lumen; P:negative regulation of cell adhesion; P:positive regulation of cell population proliferation; F:syndecan binding; P:bud outgrowth involved in lung branching; P:extracellular matrix organization; P:po…	Extracellular	Soluble	SP(Sec/SPI)	0.993248
Sma_021449-T1	Proteases	1422	Q92031	Snake venom metalloproteinase ACLF (SVMP) (EC 3.4.24.-) (ACLF-I) (Metalloproteinase VMP-I) (AclVMP-I)	2.6e-22	42.5316	97.4413	Q9UKP4	A disintegrin and metalloproteinase with thrombospondin motifs 7 (ADAM-TS 7) (ADAM-TS7) (ADAMTS-7) (EC 3.4.24.-) (COMPase)	4.99e-81	41.5883	298.516	XP_012559175	A disintegrin and metalloproteinase with thrombospondin motifs 6-like	0	54.3242	1104.35	negative regulation of cellular response to hepatocyte growth factor stimulus	1.2e-152	548.1	0	0	0	0	Cell membrane	Membrane	OTHER	0.000473
Sma_021557-T1	Other toxins	309	J3S9D9	Reticulocalbin-2 (Taipoxin-associated calcium-binding protein 49 homolog)	1.86e-48	61.5385	160.614	B5X186	Calumenin-A	1.05e-70	59.8726	224.557	XP_002162407	reticulocalbin-1-like isoform X1	1.44392e-95	70.2614	294.664	calcium ion binding	1e-80	307	0	0	0	0	Endoplasmic reticulum	Soluble	SP(Sec/SPI)	0.877754
Sma_021589-T1	Hemostasis impairing toxins	313	B5U6Y7	Snaclec CTL-Eoc125 (C-type lectin-like CTL-Eoc125)	6.14e-13	43.662	62.003	Q9BYZ8	Regenerating islet-derived protein 4 (REG-4) (Gastrointestinal secretory protein) (REG-like protein) (Regenerating islet-derived protein IV) (Reg IV)	4.35e-11	47.5806	63.5438	RMX37191	regenerating islet-derived protein 4 isoform X4	2.08724e-17	50.303	93.9745	Regenerating islet-derived protein 4	1.2e-09	70.9	0	5	F:GO:2001065; C:GO:0005623; C:GO:0005615; C:GO:0005737; F:GO:0008201	C:extracellular space; C:obsolete cell; C:cytoplasm; F:heparin binding; F:mannan binding	Extracellular	Soluble	SP(Sec/SPI)	0.702377
Sma_021618-T1	Proteases	2024	J3SDW8	Zinc metalloproteinase-disintegrin-like 8 (EC 3.4.24.-) (Snake venom metalloproteinase) (SVMP)	5.53e-53	45.2158	194.512	Q61072	Disintegrin and metalloproteinase domain-containing protein 9 (ADAM 9) (EC 3.4.24.-) (Meltrin-gamma) (Metalloprotease/disintegrin/cysteine-rich protein 9) (Myeloma cell metalloproteinase)	7.92e-54	45.4545	208.379	XP_020905912, XP_028516343	Disintegrin and metalloproteinase domain-containing protein 9	0	57.166	1388.25	metalloendopeptidase activity	0	1157.5	0	12	C:GO:0009897; C:GO:0030424; F:GO:0008237; C:GO:0005623; C:GO:0005887; P:GO:0007283; P:GO:0006508; F:GO:0005178; P:GO:0007339; P:GO:0060468; C:GO:1990913; C:GO:0043025	C:integral component of plasma membrane; C:neuronal cell body; P:binding of sperm to zona pellucida; C:external side of plasma membrane; C:sperm head plasma membrane; F:metallopeptidase activity; C:obsolete cell; P:proteolysis; F:integrin binding; P:prevention of polyspermy; P:spermatogenesis; C:axon	Extracellular	Soluble	OTHER	0.000406
Sma_021636-T1	Proteases	1802	K7Z9Q9	Nematocyst expressed protein 6 (NEP-6) (EC 3.4.24.-) (Astacin-like metalloprotease toxin)	4.23e-31	50.2092	121.324	Q19269	Zinc metalloproteinase nas-14 (EC 3.4.24.-) (Nematode astacin 14)	8.35e-39	58.1897	156.377	XP_027052260	Zinc metalloproteinase nas-13	3.07572e-93	51.2356	330.872	Astacin (Peptidase family M12A)	8.5e-63	250	0	0	0	0	Cell membrane	Membrane	OTHER	0.245478
Sma_021762-T1	Cysteine-rich Proteins	706	P81656	Venom allergen 5 (Antigen 5) (Ag5) (Cysteine-rich venom protein) (CRVP) (allergen Pol d 5)	1.19e-13	52	67.3958	A7SBN6	Zinc finger CCCH-type with G patch domain-containing protein	2.12e-104	61.985	330.872	XP_028394974	Zinc finger CCCH-type with G patch domain-containing protein	3.26292e-110	60.4651	352.829	metal ion binding	2.2e-91	343.6	0	1	P:GO:0030431	P:sleep	Plastid	Soluble	OTHER	0.032594
Sma_021807-T1	Proteases	748	A8QL59	Zinc metalloproteinase-disintegrin-like NaMP (EC 3.4.24.-) (Snake venom metalloproteinase) (SVMP)	4.71e-15	37.535	74.7146	O77633	Disintegrin and metalloproteinase domain-containing protein 10 (ADAM 10) (EC 3.4.24.81) (Kuzbanian protein homolog) (Mammalian disintegrin-metalloprotease) (CD antigen CD156c)	3.62e-131	52.6099	409.838	XP_002154090	disintegrin and metalloproteinase domain-containing protein 10	0	65.1195	682.174	Disintegrin and metalloproteinase domain-containing protein	3.9e-195	688.3	EC:3.4.24.81	0	0	0	Cell membrane	Membrane	OTHER	0.145585
Sma_021821-T1	Protease Inhibitors	677	Q6T269	Kunitz-type serine protease inhibitor bitisilin-3 (Two-Kunitz protease inhibitor) (Fragment)	1.32e-20	53.6	85.1149	Q4LDE5	Sushi, von Willebrand factor type A, EGF and pentraxin domain-containing protein 1 (CCP module-containing protein 22) (Polydom) (Selectin-like osteoblast-derived protein) (SEL-OB) (Serologically defined breast cancer antigen NY-BR-38)	9.91e-27	48.1328	120.553	XP_027037839	sushi, von Willebrand factor type A, EGF and pentraxin domain-containing protein 1-like	2.5237e-73	53.317	258.455	Sushi, von Willebrand factor type A, EGF and pentraxin	2.1e-38	167.5	0	0	0	0	Extracellular	Soluble	SP(Sec/SPI)	0.988874
Sma_021974-T1	Hemostasis impairing toxins	496	Q4QXT9	Coagulation factor X (EC 3.4.21.6) [Cleaved into: Factor X light chain; Factor X heavy chain; Activated factor Xa heavy chain]	4.15e-34	51.8519	130.568	Q9DBI0	Transmembrane protease serine 6 (EC 3.4.21.-) (Matriptase-2)	5.72e-34	50.7246	139.428	EDO43427	complement C2-like	2.59316e-98	55.2063	325.094	complement activation	1.6e-88	333.6	EC:3.4.21.47; EC:3.4.21.43	0	0	0	Extracellular	Soluble	OTHER	0.000838
Sma_022066-T1	Proteases	649	A0FKN6	Astacin-like metalloprotease toxin 1 (EC 3.4.24.-) (Loxosceles astacin-like protease 1) (LALP) (LALP1)	2.16e-27	51.2605	108.227	P42674	Blastula protease 10 (EC 3.4.24.-)	1.07e-30	47.4522	130.568	XP_001637543	Zinc metalloproteinase nas-13	4.90197e-71	41.6901	257.299	Meprin A	4e-39	169.9	EC:3.4.24.63	0	0	0	Extracellular	Soluble	SP(Sec/SPI)	0.787953
Sma_022066-T2	Proteases	628	A0FKN6	Astacin-like metalloprotease toxin 1 (EC 3.4.24.-) (Loxosceles astacin-like protease 1) (LALP) (LALP1)	1.86e-27	51.2605	108.227	P42674	Blastula protease 10 (EC 3.4.24.-)	1.16e-30	47.4522	130.568	XP_001637543	zinc metalloproteinase nas-14 isoform X4	5.54e-65	41.3295	239.965	Meprin A	3.9e-39	169.9	EC:3.4.24.63	0	0	0	Extracellular	Soluble	SP(Sec/SPI)	0.787953
Sma_022089-T1	Hemostasis impairing toxins	245	Q4QXT9	Coagulation factor X (EC 3.4.21.6) [Cleaved into: Factor X light chain; Factor X heavy chain; Activated factor Xa heavy chain]	2.22e-39	53.8136	138.658	Q6BEA2	Serine protease 27 (EC 3.4.21.-) (Marapsin) (Pancreasin)	6.59e-39	50.4032	140.584	XP_002587250	trypsin, putative	3.99404e-44	54.1322	159.073	Trypsin-like peptidase domain	9.2e-37	160.6	EC:3.4.21.22; EC:3.4.21.6	0	0	0	Extracellular	Soluble	OTHER	0.006429
Sma_022483-T1	Proteases	807	O42138	Zinc metalloproteinase-disintegrin-like ACLD (EC 3.4.24.-) (Snake venom metalloproteinase) (SVMP) (VMP-III) (AclVMP-III)	4.2e-31	46.2069	125.946	O42138	Zinc metalloproteinase-disintegrin-like ACLD (EC 3.4.24.-) (Snake venom metalloproteinase) (SVMP) (VMP-III) (AclVMP-III)	9.94e-29	46.2069	125.946	XP_019620048	disintegrin and metalloproteinase domain-containing protein 8 isoform X2	3.26151e-73	46.7354	271.937	ADAM Cysteine-Rich Domain	2.2e-26	127.9	0	48	P:GO:0010954; P:GO:2000415; C:GO:0070821; P:GO:2000418; P:GO:0051044; F:GO:0008237; P:GO:0061025; P:GO:0001525; P:GO:0048729; P:GO:0002675; F:GO:0005509; P:GO:0043312; P:GO:0043534; F:GO:0008270; P:GO:0070245; F:GO:0043621; P:GO:0071456; P:GO:2000391; P:GO:0048247; P:GO:0045670; F:GO:0004252; C:GO:0032010; P:GO:0032989; P:GO:2000399; P:GO:0050714; C:GO:0101003; P:GO:0033089; C:GO:0101002; P:GO:20…	C:alpha9-beta1 integrin-ADAM8 complex; P:positive regulation of neutrophil extravasation; P:positive regulation of tumor necrosis factor (ligand) superfamily member 11 production; P:leukocyte migration involved in inflammatory response; P:cell-matrix adhesion; P:regulation of osteoclast differentiation; P:negative regulation of thymocyte aggregation; P:positive regulation of bone resorption; F:pr…	Extracellular	Soluble	SP(Sec/SPI)	0.998297
Sma_022485-T1	Proteases	828	O42138	Zinc metalloproteinase-disintegrin-like ACLD (EC 3.4.24.-) (Snake venom metalloproteinase) (SVMP) (VMP-III) (AclVMP-III)	2.09e-25	44.4444	108.227	Q05910	Disintegrin and metalloproteinase domain-containing protein 8 (ADAM 8) (EC 3.4.24.-) (Cell surface antigen MS2) (Macrophage cysteine-rich glycoprotein) (CD antigen CD156a)	3.89e-24	48.1605	112.464	XP_019620048	disintegrin and metalloproteinase domain-containing protein 8 isoform X2	4.05512e-68	46.5398	257.684	ADAM Cysteine-Rich Domain	4.4e-22	113.6	0	48	P:GO:0010954; P:GO:2000415; C:GO:0070821; P:GO:2000418; P:GO:0051044; F:GO:0008237; P:GO:0061025; P:GO:0001525; P:GO:0048729; P:GO:0002675; F:GO:0005509; P:GO:0043312; P:GO:0043534; F:GO:0008270; P:GO:0070245; F:GO:0043621; P:GO:0071456; P:GO:2000391; P:GO:0048247; P:GO:0045670; F:GO:0004252; C:GO:0032010; P:GO:0032989; P:GO:2000399; P:GO:0050714; C:GO:0101003; P:GO:0033089; C:GO:0101002; P:GO:20…	C:alpha9-beta1 integrin-ADAM8 complex; P:positive regulation of neutrophil extravasation; P:positive regulation of tumor necrosis factor (ligand) superfamily member 11 production; P:leukocyte migration involved in inflammatory response; P:cell-matrix adhesion; P:regulation of osteoclast differentiation; P:negative regulation of thymocyte aggregation; P:positive regulation of bone resorption; F:pr…	Extracellular	Soluble	SP(Sec/SPI)	0.997311
Sma_022486-T1	Proteases	803	O42138	Zinc metalloproteinase-disintegrin-like ACLD (EC 3.4.24.-) (Snake venom metalloproteinase) (SVMP) (VMP-III) (AclVMP-III)	3.12e-29	45.583	120.168	O42138	Zinc metalloproteinase-disintegrin-like ACLD (EC 3.4.24.-) (Snake venom metalloproteinase) (SVMP) (VMP-III) (AclVMP-III)	7.38e-27	45.583	120.168	XP_019620048	disintegrin and metalloproteinase domain-containing protein 8 isoform X1	3.78037e-79	47.7966	288.886	ADAM Cysteine-Rich Domain	3.5e-24	120.6	0	48	P:GO:0010954; P:GO:2000415; C:GO:0070821; P:GO:2000418; P:GO:0051044; F:GO:0008237; P:GO:0061025; P:GO:0001525; P:GO:0048729; P:GO:0002675; F:GO:0005509; P:GO:0043312; P:GO:0043534; F:GO:0008270; P:GO:0070245; F:GO:0043621; P:GO:0071456; P:GO:2000391; P:GO:0048247; P:GO:0045670; F:GO:0004252; C:GO:0032010; P:GO:0032989; P:GO:2000399; P:GO:0050714; C:GO:0101003; P:GO:0033089; C:GO:0101002; P:GO:20…	C:alpha9-beta1 integrin-ADAM8 complex; P:positive regulation of neutrophil extravasation; P:positive regulation of tumor necrosis factor (ligand) superfamily member 11 production; P:leukocyte migration involved in inflammatory response; P:cell-matrix adhesion; P:regulation of osteoclast differentiation; P:negative regulation of thymocyte aggregation; P:positive regulation of bone resorption; F:pr…	Extracellular	Soluble	SP(Sec/SPI)	0.998121
Sma_022688-T1	Other toxins	490	A6MFL0	L-amino-acid oxidase (DvLAAO) (LAO) (EC 1.4.3.2)	6.98e-13	42.0601	66.6254	O64411	Polyamine oxidase 1 (EC 1.5.3.14) (EC 1.5.3.15)	2.26e-76	54.185	251.136	XP_027046432, RMX44007	polyamine oxidase-like	1.93121e-109	60.6481	343.199	histone demethylase activity (H3-monomethyl-K4 specific)	1.9e-86	326.6	EC:1.5.3.16; EC:1.5.3.14	0	0	0	Endoplasmic reticulum	Soluble	SP(Sec/SPI)	0.729079
Sma_023007-T1	Hemostasis impairing toxins	1836	C6JUN9	C-type lectin (CTL)	1.79e-14	48.6111	69.3218	Q67EQ1	C-type lectin domain family 4 member E (C-type lectin superfamily member 9) (Macrophage-inducible C-type lectin) (Mincle)	1.48e-15	50.4132	80.8777	XP_005884235	cleavage stimulation factor subunit 2 tau variant-like	8.86897e-13	58.0838	85.5001	metalloendopeptidase activity	3.8e-18	101.7	0	0	0	0	Nucleus	Soluble	OTHER	0.001412
Sma_023067-T1	Proteases	401	P0C6E3	Zinc metalloproteinase-disintegrin bilitoxin-1 (EC 3.4.24.-) (Snake venom metalloproteinase) (SVMP) [Cleaved into: Disintegrin]	2.37e-18	42.963	80.8777	Q05910	Disintegrin and metalloproteinase domain-containing protein 8 (ADAM 8) (EC 3.4.24.-) (Cell surface antigen MS2) (Macrophage cysteine-rich glycoprotein) (CD antigen CD156a)	2.45e-16	46.3415	84.3445	XP_019620048	disintegrin and metalloproteinase domain-containing protein 8 isoform X1	1.30614e-30	48.1132	135.961	ADAM Cysteine-Rich Domain	2.3e-13	83.6	0	48	P:GO:0010954; P:GO:2000415; C:GO:0070821; P:GO:2000418; P:GO:0051044; F:GO:0008237; P:GO:0061025; P:GO:0001525; P:GO:0048729; P:GO:0002675; F:GO:0005509; P:GO:0043312; P:GO:0043534; F:GO:0008270; P:GO:0070245; F:GO:0043621; P:GO:0071456; P:GO:2000391; P:GO:0048247; P:GO:0045670; F:GO:0004252; C:GO:0032010; P:GO:0032989; P:GO:2000399; P:GO:0050714; C:GO:0101003; P:GO:0033089; C:GO:0101002; P:GO:20…	C:alpha9-beta1 integrin-ADAM8 complex; P:positive regulation of neutrophil extravasation; P:positive regulation of tumor necrosis factor (ligand) superfamily member 11 production; P:leukocyte migration involved in inflammatory response; P:cell-matrix adhesion; P:regulation of osteoclast differentiation; P:negative regulation of thymocyte aggregation; P:positive regulation of bone resorption; F:pr…	Extracellular	Soluble	SP(Sec/SPI)	0.998297
Sma_023242-T1	Hemostasis impairing toxins	3449	Q593B6	Coagulation factor V [Cleaved into: Coagulation factor V heavy chain; Coagulation factor V light chain]	7.96e-27	45.3012	117.087	P18433	Receptor-type tyrosine-protein phosphatase alpha (Protein-tyrosine phosphatase alpha) (R-PTP-alpha) (EC 3.1.3.48)	1.18e-107	49.7175	369.007	XP_020625308	receptor-type tyrosine-protein phosphatase F-like isoform X6	3.45701e-167	45.8942	590.497	presynaptic membrane assembly	8.8e-125	456.8	EC:3.1.3.48	14	P:GO:0007157; P:GO:1902532; F:GO:0005102; P:GO:0046426; P:GO:0097105; C:GO:0005623; C:GO:0005887; P:GO:0050775; P:GO:0007185; P:GO:0050776; F:GO:0005001; P:GO:0035335; F:GO:0050839; P:GO:0051965	C:integral component of plasma membrane; P:regulation of immune response; P:negative regulation of receptor signaling pathway via JAK-STAT; P:presynaptic membrane assembly; P:positive regulation of synapse assembly; P:transmembrane receptor protein tyrosine phosphatase signaling pathway; F:signaling receptor binding; F:cell adhesion molecule binding; P:negative regulation of intracellular signal …	Cell membrane	Membrane	SP(Sec/SPI)	0.762259
Sma_023246-T1	Hemostasis impairing toxins	2585	Q7SZN0	Venom prothrombin activator pseutarin-C non-catalytic subunit (PCNS) (vPA) (Venom coagulation factor Va-like protein) [Cleaved into: Pseutarin-C non-catalytic subunit heavy chain; Pseutarin-C non-catalytic subunit light chain]	2.07e-22	48.0769	102.064	Q3UH53	Protein sidekick-1	1.89e-47	41.7722	192.586	XP_022805730	receptor-type tyrosine-protein phosphatase F-like	1.36655e-88	46.8	336.265	Sidekick cell adhesion molecule 2	3.4e-65	258.5	0	9	P:GO:0060219; C:GO:0045202; P:GO:0045216; F:GO:0042802; P:GO:0007156; C:GO:0005886; C:GO:0005623; P:GO:0007416; P:GO:0010842	C:synapse; P:cell-cell junction organization; F:identical protein binding; C:obsolete cell; P:homophilic cell adhesion via plasma membrane adhesion molecules; P:retina layer formation; P:synapse assembly; P:camera-type eye photoreceptor cell differentiation; C:plasma membrane	Cell membrane	Membrane	OTHER	0.006393
Sma_023246-T2	Hemostasis impairing toxins	2134	Q58L91	Venom prothrombin activator oscutarin-C non-catalytic subunit (vPA) (Venom coagulation factor Va-like protein) [Cleaved into: Oscutarin-C non-catalytic subunit heavy chain; Oscutarin-C non-catalytic subunit light chain]	2.14e-24	48.9097	108.227	Q3UH53	Protein sidekick-1	3.43e-47	41.7722	191.43	XP_029200168	receptor-type tyrosine-protein phosphatase F-like isoform X7	8.27261e-86	41.697	327.405	Sidekick cell adhesion molecule 2	2.8e-65	258.5	0	9	P:GO:0060219; C:GO:0045202; P:GO:0045216; F:GO:0042802; P:GO:0007156; C:GO:0005886; C:GO:0005623; P:GO:0007416; P:GO:0010842	C:synapse; P:cell-cell junction organization; F:identical protein binding; C:obsolete cell; P:homophilic cell adhesion via plasma membrane adhesion molecules; P:retina layer formation; P:synapse assembly; P:camera-type eye photoreceptor cell differentiation; C:plasma membrane	Cell membrane	Membrane	OTHER	0.001297
Sma_023293-T1	Proteases	831	B2D0J4	Venom dipeptidyl peptidase 4 (Allergen C) (Venom dipeptidyl peptidase IV) (EC 3.4.14.5) (allergen Api m 5)	2.23e-116	51.2712	368.237	P97321	Prolyl endopeptidase FAP (EC 3.4.21.26) (Dipeptidyl peptidase FAP) (EC 3.4.14.5) (Fibroblast activation protein alpha) (FAPalpha) (Gelatine degradation protease FAP) (EC 3.4.21.-) (Integral membrane serine protease) (Post-proline cleaving enzyme) (Serine integral membrane protease) (SIMP) (Surface-expressed protease) (Seprase) [Cleaved into: Antiplasmin-cleaving enzyme FAP, soluble form (APCE) (E…	1.13e-143	55.54	445.277	XP_012555155	dipeptidyl peptidase 4-like isoform X2	0	63.2184	681.019	negative regulation of extracellular matrix disassembly	3e-188	665.6	EC:3.4.14.5	44	C:GO:0016021; P:GO:0033632; P:GO:0010716; F:GO:0008239; C:GO:0071438; P:GO:0031295; P:GO:0001666; P:GO:0001662; C:GO:0005794; P:GO:0071158; P:GO:0097325; P:GO:0071850; P:GO:0036343; C:GO:0030139; F:GO:0004252; P:GO:0008284; F:GO:0042277; C:GO:0005615; C:GO:0016324; P:GO:0050796; P:GO:0051704; P:GO:0010710; P:GO:0051603; F:GO:0004222; P:GO:0060244; C:GO:0046581; P:GO:0046718; P:GO:1900119; F:GO:00…	C:extracellular space; P:response to hypoxia; F:integrin binding; P:regulation of cell-cell adhesion mediated by integrin; F:dipeptidyl-peptidase activity; P:regulation of T cell mediated immunity; P:psychomotor behavior; P:proteolysis involved in cellular protein catabolic process; P:behavioral fear response; P:multi-organism process; P:negative regulation of extracellular matrix disassembly; P:…	Cell membrane	Membrane	OTHER	0.000438
Sma_023577-T1	Hemostasis impairing toxins	669	D8VNS8	Ryncolin-2	3.59e-67	68.0751	220.705	O70497	Ficolin-2 (Collagen/fibrinogen domain-containing protein 2) (Ficolin-B) (Ficolin-beta) (L-ficolin)	5.6e-69	66.5072	230.72	XP_028512828	titin isoform X1	4.35452e-103	50.3106	338.576	complement activation, lectin pathway	8.9e-66	258.5	0	0	0	0	Extracellular	Soluble	OTHER	0.00107
Sma_023958-T1	Hemostasis impairing toxins	589	D8VNS8	Ryncolin-2	3.17e-66	66.3462	216.468	P57756	Ficolin-2 (Collagen/fibrinogen domain-containing protein 2) (Ficolin-B) (Ficolin-beta) (L-ficolin)	1.78e-69	64.5933	230.335	XP_028512828	Fibrinogen C domain-containing protein 1	1.67546e-100	61.6402	329.331	chitin binding	2.5e-64	253.4	0	2	C:GO:0016020; F:GO:0008061	F:chitin binding; C:membrane	Extracellular	Soluble	OTHER	0.000822
Sma_024046-T1	Hemostasis impairing toxins	224	D8VNT0	Ryncolin-4	8.29e-49	62.0112	159.844	Q05546	Tenascin-R (TN-R) (Janusin) (Neural recognition molecule J1-160/180) (Restrictin)	7.36e-52	63.1016	182.956	XP_019862948	fibrinogen-like protein A	4.0975e-55	66.6667	187.578	negative regulation of axon extension involved in regeneration	2.9e-45	188.7	0	20	C:GO:0072534; P:GO:0007158; P:GO:0007411; P:GO:0051971; P:GO:0030198; C:GO:0045121; P:GO:0008306; P:GO:0022029; P:GO:0050805; P:GO:0060291; C:GO:0009986; P:GO:0022408; P:GO:0050808; F:GO:0046625; C:GO:0005623; P:GO:0050885; P:GO:0035641; F:GO:0005178; P:GO:0048692; P:GO:0051968	C:perineuronal net; P:long-term synaptic potentiation; P:associative learning; C:membrane raft; F:integrin binding; F:sphingolipid binding; P:positive regulation of synaptic transmission, glutamatergic; P:extracellular matrix organization; P:negative regulation of cell-cell adhesion; C:cell surface; P:negative regulation of axon extension involved in regeneration; P:synapse organization; P:positi…	Extracellular	Soluble	OTHER	0.002578
Sma_024047-T1	Hemostasis impairing toxins	527	D8VNS7	Ryncolin-1	2.42e-49	61.658	170.244	Q05546	Tenascin-R (TN-R) (Janusin) (Neural recognition molecule J1-160/180) (Restrictin)	1.74e-51	61.3953	192.971	RMX43592	sushi, von Willebrand factor type A, EGF and pentraxin domain-containing protein 1-like	1.23059e-98	55	334.339	transmembrane receptor protein tyrosine kinase signaling pathway	9.1e-74	284.6	0	3	P:GO:0007169; F:GO:0005102; C:GO:0005615	C:extracellular space; P:transmembrane receptor protein tyrosine kinase signaling pathway; F:signaling receptor binding	Extracellular	Soluble	OTHER	0.000637
Sma_024050-T1	Hemostasis impairing toxins	361	D8VNS7	Ryncolin-1	3.66e-46	60.5556	157.532	Q05546	Tenascin-R (TN-R) (Janusin) (Neural recognition molecule J1-160/180) (Restrictin)	6.06e-46	61.7647	171.4	XP_020603629	ficolin-2-like	2.49061e-52	51.0204	187.578	chitin binding	1.4e-44	187.2	0	2	C:GO:0016020; F:GO:0008061	F:chitin binding; C:membrane	Extracellular	Soluble	OTHER	0.075408
Sma_024051-T1	Hemostasis impairing toxins	721	D8VNS7	Ryncolin-1	3.54e-39	59.3407	144.436	Q9WTS8	Ficolin-1 (Collagen/fibrinogen domain-containing protein 1) (Ficolin-A) (Ficolin-alpha) (M-ficolin)	1.86e-37	60.1156	146.362	PFX22965	fibrinogen-like protein A	2.04289e-104	48.1586	360.147	transmembrane receptor protein tyrosine kinase signaling pathway	1.7e-67	264.2	0	3	P:GO:0007169; F:GO:0005102; C:GO:0005615	C:extracellular space; P:transmembrane receptor protein tyrosine kinase signaling pathway; F:signaling receptor binding	Extracellular	Soluble	OTHER	0.000835
Sma_024052-T1	Hemostasis impairing toxins	425	D8VNT0	Ryncolin-4	4.14e-35	61.1842	129.413	Q05546	Tenascin-R (TN-R) (Janusin) (Neural recognition molecule J1-160/180) (Restrictin)	1.76e-34	61.8705	139.813	XP_020603629	fibrinogen-like protein A	1.42213e-44	51.4493	169.088	negative regulation of axon extension involved in regeneration	1.6e-36	160.6	0	20	C:GO:0072534; P:GO:0007158; P:GO:0007411; P:GO:0051971; P:GO:0030198; C:GO:0045121; P:GO:0008306; P:GO:0022029; P:GO:0050805; P:GO:0060291; C:GO:0009986; P:GO:0022408; P:GO:0050808; F:GO:0046625; C:GO:0005623; P:GO:0050885; P:GO:0035641; F:GO:0005178; P:GO:0048692; P:GO:0051968	C:perineuronal net; P:long-term synaptic potentiation; P:associative learning; C:membrane raft; F:integrin binding; F:sphingolipid binding; P:positive regulation of synaptic transmission, glutamatergic; P:extracellular matrix organization; P:negative regulation of cell-cell adhesion; C:cell surface; P:negative regulation of axon extension involved in regeneration; P:synapse organization; P:positi…	Extracellular	Soluble	OTHER	0.211071
Sma_024053-T1	Hemostasis impairing toxins	399	D8VNS7	Ryncolin-1	1.8e-49	60.6218	167.162	Q05546	Tenascin-R (TN-R) (Janusin) (Neural recognition molecule J1-160/180) (Restrictin)	1.87e-50	57.6744	186.037	XP_019861589	fibrinogen-like protein A	2.04138e-60	58.75	207.994	mesenchymal-epithelial cell signaling involved in prostate gland development	1e-56	227.6	0	16	P:GO:0060739; P:GO:0010628; P:GO:0030198; P:GO:0060740; P:GO:0007528; P:GO:0060447; F:GO:0001968; P:GO:0043687; P:GO:0014012; C:GO:0005623; C:GO:0005788; P:GO:0007162; P:GO:0008284; C:GO:0005614; F:GO:0045545; C:GO:0005604	P:prostate gland epithelium morphogenesis; C:interstitial matrix; P:mesenchymal-epithelial cell signaling involved in prostate gland development; C:basement membrane; C:endoplasmic reticulum lumen; P:negative regulation of cell adhesion; P:positive regulation of cell population proliferation; F:syndecan binding; P:bud outgrowth involved in lung branching; P:extracellular matrix organization; P:po…	Extracellular	Soluble	OTHER	0.001293
Sma_024054-T1	Hemostasis impairing toxins	257	E2IYB3	Veficolin-1 (Fragment)	1.13e-27	62.3853	102.449	E2IYB3	Veficolin-1 (Fragment)	2.68e-25	62.3853	102.449	XP_031572750, XP_031572751	fibrinogen-like protein A	4.23617e-28	46.5116	120.553	Fibrinogen-related domains (FReDs)	2.1e-23	116.3	0	14	F:GO:0030971; F:GO:0030297; P:GO:0043536; P:GO:0009967; P:GO:0043537; P:GO:0045766; P:GO:0061098; P:GO:0043066; P:GO:0071456; P:GO:2000273; P:GO:0007171; C:GO:0005615; P:GO:0050900; P:GO:0016525	C:extracellular space; P:negative regulation of blood vessel endothelial cell migration; P:positive regulation of signal transduction; F:transmembrane receptor protein tyrosine kinase activator activity; F:receptor tyrosine kinase binding; P:positive regulation of blood vessel endothelial cell migration; P:positive regulation of angiogenesis; P:activation of transmembrane receptor protein tyrosin…	Cytoplasm	Soluble	OTHER	0.401223
Sma_024093-T1	Other toxins	304	J3S9D9	Reticulocalbin-2 (Taipoxin-associated calcium-binding protein 49 homolog)	4.52e-44	58.6716	149.058	Q6XLQ7	Calumenin	6.32e-54	56.9966	181.03	XP_001634852	calumenin isoform X2	7.68155e-95	68.543	292.352	calcium ion binding	2.9e-64	252.3	0	0	0	0	Endoplasmic reticulum	Soluble	SP(Sec/SPI)	0.652145
Sma_024207-T1	Other toxins	646	J3S9D9	Reticulocalbin-2 (Taipoxin-associated calcium-binding protein 49 homolog)	1.31e-60	63.3094	201.445	Q6IQP3	Calumenin-A	1.59e-118	73.2919	358.607	XP_002167284	calumenin-B	2.03557e-127	79.2994	388.652	Calumenin b	7e-84	318.5	0	9	P:GO:0009047; P:GO:0006265; C:GO:0005623; C:GO:0005634; P:GO:0045893; P:GO:2000373; C:GO:0005703; C:GO:0005737; P:GO:0006325	P:chromatin organization; C:polytene chromosome puff; C:obsolete cell; P:DNA topological change; P:positive regulation of DNA topoisomerase (ATP-hydrolyzing) activity; C:cytoplasm; C:nucleus; P:dosage compensation by hyperactivation of X chromosome; P:positive regulation of transcription, DNA-templated	Cytoplasm	Soluble	OTHER	0.000899
Sma_024899-T1	Proteases	942	P0DM89	Zinc metalloproteinase-disintegrin-like brevilysin H2a (EC 3.4.24.-) (Snake venom metalloproteinase) (SVMP)	6.54e-12	39.0805	64.6994	Q61072	Disintegrin and metalloproteinase domain-containing protein 9 (ADAM 9) (EC 3.4.24.-) (Meltrin-gamma) (Metalloprotease/disintegrin/cysteine-rich protein 9) (Myeloma cell metalloproteinase)	4.07e-13	40.0763	77.0258	XP_019645275	Disintegrin and metalloproteinase domain-containing protein 9	6.68895e-25	40.5963	124.405	Plasmin dissolves the fibrin of blood clots and acts as a proteolytic factor in a variety of other processes including embryonic development, tissue remodeling, tumor invasion, and inflammation. In ovulation, weakens the walls of the Graafian follicle. It activates the urokinase-type plasminogen activator, collagenases and several complement zymogens, such as C1 and C5. Cleavage of fibronectin an…	1.3e-14	89	EC:3.4.21.7	0	0	0	Extracellular	Soluble	SP(Sec/SPI)	0.885026
Sma_025002-T1	Neurotoxin	2106	G0LXV8	Alpha-latrotoxin-Lh1a (Alpha-LTX-Lh1a) (Alpha-latrotoxin) (Fragment)	3.15e-12	44.6512	68.1662	Q5CZ79	Ankyrin repeat domain-containing protein 20B (Ankyrin repeat domain-containing protein 20A pseudogene)	1.07e-21	47.9638	106.686	XP_031561127	ankyrin repeat domain-containing protein 26-like	2.66436e-26	52.0179	131.724	ankyrin repeat	2.5e-13	85.9	0	4	P:GO:0048208; C:GO:0005654; C:GO:0005623; C:GO:0005829	C:obsolete cell; P:COPII vesicle coating; C:cytosol; C:nucleoplasm	Cytoplasm	Soluble	OTHER	0.001879
Sma_025115-T1	Neurotoxin	188	Q25338	Delta-latroinsectotoxin-Lt1a (Delta-LIT-Lt1a) (Delta-latroinsectotoxin) (Delta-LIT)	2.06e-12	59.8039	61.2326	Q9FNP4	Phytochrome-interacting ankyrin-repeat protein 2 [Cleaved into: Protein ANKYRIN REPEAT 6, mitochondrial]	1.91e-11	58	62.7734	XP_012556841	protein phosphatase 1 regulatory subunit 27	1.06228e-21	61.0169	97.0561	blood vessel endothelial cell proliferation involved in sprouting angiogenesis	9.6e-10	70.5	0	10	P:GO:0001938; P:GO:0002043; P:GO:0090263; P:GO:1902367; P:GO:0000122; P:GO:0001755; P:GO:0045581; P:GO:0001569; P:GO:0050931; P:GO:0032525	P:somite rostral/caudal axis specification; P:blood vessel endothelial cell proliferation involved in sprouting angiogenesis; P:negative regulation of Notch signaling pathway involved in somitogenesis; P:negative regulation of T cell differentiation; P:positive regulation of endothelial cell proliferation; P:negative regulation of transcription by RNA polymerase II; P:branching involved in blood …	Cytoplasm	Soluble	OTHER	0.000466
Sma_025170-T1	Phospholipases	145	P19000	Basic phospholipase A2 P'513 (svPLA2) (EC 3.1.1.4) (Phosphatidylcholine 2-acylhydrolase)	6.28e-24	49.6644	87.0409	P19000	Basic phospholipase A2 P'513 (svPLA2) (EC 3.1.1.4) (Phosphatidylcholine 2-acylhydrolase)	1.49e-21	49.6644	87.0409	XP_012559991	phospholipase A2	7.52676e-27	57.0423	115.931	low-density lipoprotein particle remodeling	2.8e-25	121.7	EC:3.1.1.4	12	F:GO:0004623; P:GO:0036150; P:GO:0006654; P:GO:0036151; P:GO:0036152; C:GO:0005576; P:GO:0043062; P:GO:0034374; P:GO:0036148; P:GO:0036149; P:GO:0006954; P:GO:0097164	P:inflammatory response; P:extracellular structure organization; P:phosphatidic acid biosynthetic process; F:phospholipase A2 activity; P:phosphatidylinositol acyl-chain remodeling; P:phosphatidylcholine acyl-chain remodeling; C:extracellular region; P:phosphatidylglycerol acyl-chain remodeling; P:ammonium ion metabolic process; P:phosphatidylethanolamine acyl-chain remodeling; P:low-density lipo…	Extracellular	Soluble	SP(Sec/SPI)	0.993192
Sma_025190-T1	Neurotoxin	277	Q25338	Delta-latroinsectotoxin-Lt1a (Delta-LIT-Lt1a) (Delta-latroinsectotoxin) (Delta-LIT)	1.13e-14	69.863	70.0922	Q9H2K2	Poly [ADP-ribose] polymerase tankyrase-2 (EC 2.4.2.30) (ADP-ribosyltransferase diphtheria toxin-like 6) (ARTD6) (Poly [ADP-ribose] polymerase 5B) (Protein poly-ADP-ribosyltransferase tankyrase-2) (EC 2.4.2.-) (TNKS-2) (TRF1-interacting ankyrin-related ADP-ribose polymerase 2) (Tankyrase II) (Tankyrase-2) (TANK2) (Tankyrase-like protein) (Tankyrase-related protein)	1.06e-13	46.2025	74.3294	XP_012555106	serine/threonine-protein phosphatase 6 regulatory ankyrin repeat subunit C-like	2.03034e-17	63.6364	88.1965	Ankyrin repeat domain-containing protein	2.8e-05	56.2	0	5	P:GO:0006621; C:GO:0005783; P:GO:0010869; F:GO:0005102; C:GO:0005623	C:endoplasmic reticulum; C:obsolete cell; P:regulation of receptor biosynthetic process; P:protein retention in ER lumen; F:signaling receptor binding	Cytoplasm	Soluble	OTHER	0.000507
Sma_025224-T1	Neurotoxin	234	Q25338	Delta-latroinsectotoxin-Lt1a (Delta-LIT-Lt1a) (Delta-latroinsectotoxin) (Delta-LIT)	9.05e-11	54.1667	57.3806	Q9DBR7	Protein phosphatase 1 regulatory subunit 12A (Myosin phosphatase-targeting subunit 1) (Myosin phosphatase target subunit 1)	6.53e-13	58.2278	70.8626	XP_028399364, XP_028411939	protein phosphatase 1 regulatory subunit 12A-like	1.26453e-20	64.9573	96.6709	negative regulation of protein export from nucleus	0.019	46.6	0	25	F:GO:0003723; P:GO:0046826; P:GO:0042325; F:GO:0061630; C:GO:0016607; P:GO:0045732; P:GO:0006260; P:GO:0007050; P:GO:0016579; C:GO:0070531; P:GO:0031441; P:GO:0006303; P:GO:0001894; F:GO:0042803; P:GO:0043066; P:GO:0000729; P:GO:0043065; F:GO:0019900; C:GO:0005623; C:GO:0031436; P:GO:0007283; C:GO:1990904; F:GO:0046982; C:GO:0036464; P:GO:0085020	P:regulation of phosphorylation; P:negative regulation of mRNA 3'-end processing; F:kinase binding; C:nuclear speck; C:BRCA1-BARD1 complex; C:BRCA1-A complex; P:DNA replication; P:DNA double-strand break processing; P:spermatogenesis; P:negative regulation of protein export from nucleus; F:protein homodimerization activity; P:protein deubiquitination; C:ribonucleoprotein complex; P:positive regul…	Cytoplasm	Soluble	OTHER	0.001386
Sma_025350-T1	Hemostasis impairing toxins	316	D8VNS8	Ryncolin-2	7.77e-48	54.8117	160.614	Q92752	Tenascin-R (TN-R) (Janusin) (Restrictin)	1.08e-50	62.5	183.726	XP_019853438	microfibril-associated glycoprotein 4-like	1.51546e-58	60	199.134	chitin binding	9.4e-50	204.1	0	2	C:GO:0016020; F:GO:0008061	F:chitin binding; C:membrane	Extracellular	Soluble	SP(Sec/SPI)	0.90776
Sma_025428-T1	Hemostasis impairing toxins	204	C6JUN9	C-type lectin (CTL)	3.66e-18	55.6522	74.3294	P20693	Low affinity immunoglobulin epsilon Fc receptor (Fc-epsilon-RII) (Lymphocyte IgE receptor) (CD antigen CD23)	5.49e-18	51.6854	83.5741	HHC05503	macrophage mannose receptor 1-like	4.95455e-20	58.1818	98.2117	Mannose receptor, C type 1	4e-17	95.1	0	14	F:GO:0004888; F:GO:0005537; P:GO:0007165; P:GO:0071353; F:GO:0038024; P:GO:0006898; C:GO:0009986; C:GO:0010008; P:GO:0071346; P:GO:0071222; C:GO:0005623; C:GO:0005887; P:GO:0098657; P:GO:0051704	C:integral component of plasma membrane; C:endosome membrane; P:signal transduction; P:import into cell; F:transmembrane signaling receptor activity; P:receptor-mediated endocytosis; P:cellular response to lipopolysaccharide; P:cellular response to interleukin-4; F:cargo receptor activity; P:cellular response to interferon-gamma; F:mannose binding; C:cell surface; P:multi-organism process; C:obso…	Extracellular	Soluble	SP(Sec/SPI)	0.912506
Sma_025517-T1	Hemostasis impairing toxins	589	D8VNS8	Ryncolin-2	7.83e-68	69.7115	220.705	O70497	Ficolin-2 (Collagen/fibrinogen domain-containing protein 2) (Ficolin-B) (Ficolin-beta) (L-ficolin)	6.88e-68	62.8821	226.098	XP_028512828	Fibrinogen C domain-containing protein 1	1.24425e-100	49.8382	329.717	cell surface pattern recognition receptor signaling pathway	2.8e-63	250	0	0	0	0	Extracellular	Soluble	OTHER	0.001095
Sma_025559-T1	Hemostasis impairing toxins	565	D8VNT0	Ryncolin-4	1.3e-39	55.5556	144.436	A2AV25	Fibrinogen C domain-containing protein 1	9.75e-45	50.4886	167.548	XP_028390977	ficolin-2-like isoform X2	1.28299e-79	48.9524	272.322	Fibrinogen-related domains (FReDs)	5.7e-66	258.8	0	0	0	0	Extracellular	Soluble	OTHER	0.007794
Sma_025571-T1	Other toxins	487	A6MFL0	L-amino-acid oxidase (DvLAAO) (LAO) (EC 1.4.3.2)	1.63e-15	40.6061	75.0998	O64411	Polyamine oxidase 1 (EC 1.5.3.14) (EC 1.5.3.15)	3.05e-71	54.3103	237.654	XP_002594743	polyamine oxidase 1-like	1.08794e-108	58.613	342.813	histone demethylase activity (H3-monomethyl-K4 specific)	2.1e-88	333.2	EC:1.5.3.16; EC:1.5.3.14	0	0	0	Endoplasmic reticulum	Membrane	OTHER	0.012612
Sma_026131-T1	Proteases	661	O73795	Zinc metalloproteinase/disintegrin [Cleaved into: Snake venom metalloproteinase Mt-b (SVMP) (EC 3.4.24.-); Disintegrin]	1.17e-16	40.2597	79.337	Q10741	Disintegrin and metalloproteinase domain-containing protein 10 (ADAM 10) (EC 3.4.24.81) (Kuzbanian protein homolog) (Mammalian disintegrin-metalloprotease) (Myelin-associated metalloproteinase) (CD antigen CD156c)	1.59e-138	61.811	426.017	XP_012559583	disintegrin and metalloproteinase domain-containing protein 10	2.61615e-145	64.7059	451.44	Disintegrin and metalloproteinase domain-containing protein	6.8e-135	488	EC:3.4.24.81	55	C:GO:0016021; C:GO:0070821; P:GO:1902667; P:GO:0007400; P:GO:0051088; P:GO:0051089; P:GO:0003007; P:GO:0006913; P:GO:0001701; P:GO:0040025; P:GO:0061320; C:GO:0097197; P:GO:0030307; P:GO:0045670; P:GO:0048542; C:GO:0097038; F:GO:0004222; P:GO:0007519; P:GO:0006468; F:GO:0019901; P:GO:0022617; P:GO:0007162; C:GO:0005802; P:GO:0030516; P:GO:0030511; P:GO:0034205; P:GO:0007267; P:GO:0007229; P:GO:00…	P:PMA-inducible membrane protein ectodomain proteolysis; C:dendritic spine; F:integrin binding; P:glial cell migration; C:specific granule membrane; P:amyloid-beta formation; P:in utero embryonic development; P:border follicle cell migration; P:positive regulation of cell growth; P:constitutive protein ectodomain proteolysis; P:protein processing; P:vulval development; P:cell-cell signaling; P:in…	Extracellular	Soluble	SP(Sec/SPI)	0.990591
Sma_026182-T1	Hemostasis impairing toxins	249	D8VNS7	Ryncolin-1	2.19e-50	59.0674	164.851	Q05546	Tenascin-R (TN-R) (Janusin) (Neural recognition molecule J1-160/180) (Restrictin)	8.59e-54	58.2569	189.889	XP_020904368	Angiopoietin-related protein 7	1.12064e-60	62.7803	211.075	mesenchymal-epithelial cell signaling involved in prostate gland development	2.4e-48	199.1	0	16	P:GO:0060739; P:GO:0010628; P:GO:0030198; P:GO:0060740; P:GO:0007528; P:GO:0060447; F:GO:0001968; P:GO:0043687; P:GO:0014012; C:GO:0005623; C:GO:0005788; P:GO:0007162; P:GO:0008284; C:GO:0005614; F:GO:0045545; C:GO:0005604	P:prostate gland epithelium morphogenesis; C:interstitial matrix; P:mesenchymal-epithelial cell signaling involved in prostate gland development; C:basement membrane; C:endoplasmic reticulum lumen; P:negative regulation of cell adhesion; P:positive regulation of cell population proliferation; F:syndecan binding; P:bud outgrowth involved in lung branching; P:extracellular matrix organization; P:po…	Extracellular	Soluble	OTHER	0.021777
Sma_026194-T1	Hemostasis impairing toxins	583	D8VNS8	Ryncolin-2	4.86e-60	63.3803	199.904	O70165	Ficolin-1 (Collagen/fibrinogen domain-containing protein 1) (Ficolin-A) (Ficolin-alpha) (M-ficolin)	9.83e-63	64.1148	213.001	XP_020904368	angiopoietin-related protein 7	1.40111e-96	50.4983	316.62	mesenchymal-epithelial cell signaling involved in prostate gland development	5.2e-62	245.7	0	16	P:GO:0060739; P:GO:0010628; P:GO:0030198; P:GO:0060740; P:GO:0007528; P:GO:0060447; F:GO:0001968; P:GO:0043687; P:GO:0014012; C:GO:0005623; C:GO:0005788; P:GO:0007162; P:GO:0008284; C:GO:0005614; F:GO:0045545; C:GO:0005604	P:prostate gland epithelium morphogenesis; C:interstitial matrix; P:mesenchymal-epithelial cell signaling involved in prostate gland development; C:basement membrane; C:endoplasmic reticulum lumen; P:negative regulation of cell adhesion; P:positive regulation of cell population proliferation; F:syndecan binding; P:bud outgrowth involved in lung branching; P:extracellular matrix organization; P:po…	Extracellular	Soluble	OTHER	0.005128
Sma_026277-T1	Hemostasis impairing toxins	346	D8VNS8	Ryncolin-2	1.83e-19	46.7532	84.3445	Q8BP40	Lysophosphatidic acid phosphatase type 6 (EC 3.1.3.2) (Acid phosphatase 6, lysophosphatidic) (Acid phosphatase-like protein 1) (PACPL1)	9.45e-23	60	101.293	KXJ18681	Fibrinogen C domain-containing protein 1	4.48402e-25	54.7297	117.472	chitin binding	1.3e-20	107.5	0	2	C:GO:0016020; F:GO:0008061	F:chitin binding; C:membrane	Extracellular	Membrane	OTHER	0.055163
Sma_026529-T1	Proteases	340	K7Z9Q9	Nematocyst expressed protein 6 (NEP-6) (EC 3.4.24.-) (Astacin-like metalloprotease toxin)	6.12e-33	48.927	120.168	Q20191	Zinc metalloproteinase nas-13 (EC 3.4.24.-) (Nematode astacin 13)	3.65e-39	57.2093	147.132	XP_020914254	zinc metalloproteinase nas-6-like isoform X1	6.17289e-51	57.6336	184.496	Astacin (Peptidase family M12A)	8.9e-38	164.5	0	0	0	0	Extracellular	Soluble	SP(Sec/SPI)	0.999298
Sma_026776-T1	Hemostasis impairing toxins	4523	Q7SZN0	Venom prothrombin activator pseutarin-C non-catalytic subunit (PCNS) (vPA) (Venom coagulation factor Va-like protein) [Cleaved into: Pseutarin-C non-catalytic subunit heavy chain; Pseutarin-C non-catalytic subunit light chain]	1.85e-17	49.1018	86.6557	P33450	Cadherin-related tumor suppressor (Protein fat) [Cleaved into: Ft-mito]	0	46.1084	918.687	XP_020903962	protocadherin Fat 4 isoform X1	0	59.2593	3155.16	Protocadherin Fat 4-like	0	1311.2	0	16	P:GO:0035329; P:GO:0007157; P:GO:0008543; P:GO:0003007; P:GO:0007009; P:GO:0043931; P:GO:0007219; C:GO:0045177; P:GO:0072307; P:GO:0021987; P:GO:0001658; P:GO:0001736; P:GO:0072137; P:GO:0060122; C:GO:0005623; P:GO:0048565	P:ossification involved in bone maturation; P:Notch signaling pathway; P:digestive tract development; P:cerebral cortex development; P:establishment of planar polarity; P:hippo signaling; P:fibroblast growth factor receptor signaling pathway; P:regulation of metanephric nephron tubule epithelial cell differentiation; P:plasma membrane organization; P:branching involved in ureteric bud morphogenes…	Cell membrane	Membrane	SP(Sec/SPI)	0.989658
Sma_026814-T1	Phospholipases	302	P16354	Phospholipase A2 isozymes PA3A/PA3B/PA5 (PLA2) (EC 3.1.1.4) (Phosphatidylcholine 2-acylhydrolase)	7.17e-14	55.5556	64.3142	P16354	Phospholipase A2 isozymes PA3A/PA3B/PA5 (PLA2) (EC 3.1.1.4) (Phosphatidylcholine 2-acylhydrolase)	1.7e-11	55.5556	64.3142	XP_002165160	Hypothetical predicted protein	1.1353e-19	46.7456	100.523	arachidonic acid secretion	6.3e-11	75.1	EC:3.1.1.4	0	0	0	Extracellular	Soluble	SP(Sec/SPI)	0.971734
Sma_027029-T1	Other toxins	364	A7ISW1	Glutaminyl-peptide cyclotransferase (EC 2.3.2.5) (Glutaminyl cyclase) (QC) (Glutaminyl-tRNA cyclotransferase)	2.69e-85	61.3497	259.61	Q16769	Glutaminyl-peptide cyclotransferase (EC 2.3.2.5) (Glutaminyl cyclase) (QC) (sQC) (Glutaminyl-tRNA cyclotransferase) (Glutamyl cyclase) (EC)	1.89e-88	61.1276	273.478	XP_002158175	glutaminyl-peptide cyclotransferase-like	1.89817e-121	71.9033	364.77	glutaminyl-peptide cyclotransferase activity	1.4e-97	363.2	EC:2.3.2.5	9	F:GO:0016603; P:GO:0017186; F:GO:0004222; P:GO:0050829; C:GO:0005623; P:GO:0006508; C:GO:0005615; C:GO:0005739; P:GO:0051704	P:defense response to Gram-negative bacterium; P:peptidyl-pyroglutamic acid biosynthetic process, using glutaminyl-peptide cyclotransferase; C:extracellular space; C:mitochondrion; F:metalloendopeptidase activity; P:multi-organism process; C:obsolete cell; F:glutaminyl-peptide cyclotransferase activity; P:proteolysis	Extracellular	Soluble	SP(Sec/SPI)	0.838027
Sma_027216-T1	Hemostasis impairing toxins	367	D8VNT0	Ryncolin-4	7.83e-47	61.2022	159.458	O00602	Ficolin-1 (Collagen/fibrinogen domain-containing protein 1) (Ficolin-A) (Ficolin-alpha) (M-ficolin)	2.54e-46	63.9344	163.696	XP_019853438	fibrinogen C domain-containing protein 1-like	3.91829e-54	61.5741	189.504	chitin binding	3.5e-48	199.1	0	2	C:GO:0016020; F:GO:0008061	F:chitin binding; C:membrane	Extracellular	Soluble	SP(Sec/SPI)	0.513868
Sma_027217-T1	Hemostasis impairing toxins	403	D8VNT0	Ryncolin-4	1.9e-41	61.5819	145.976	Q92752	Tenascin-R (TN-R) (Janusin) (Restrictin)	6.87e-45	58.5253	169.859	XP_019853438	microfibril-associated glycoprotein 4-like	1.02847e-51	60.9302	184.111	chitin binding	4.7e-46	192.2	0	2	C:GO:0016020; F:GO:0008061	F:chitin binding; C:membrane	Extracellular	Soluble	OTHER	0.000428
Sma_027406-T1	Other toxins	226	Q75WF2	Plancitoxin-1 (EC 3.1.22.1) (Plancitoxin I) (Plan-I) [Cleaved into: Plancitoxin-1 subunit alpha; Plancitoxin-1 subunit beta]	2.09e-25	57.1429	98.2117	Q75WF2	Plancitoxin-1 (EC 3.1.22.1) (Plancitoxin I) (Plan-I) [Cleaved into: Plancitoxin-1 subunit alpha; Plancitoxin-1 subunit beta]	4.96e-23	57.1429	98.2117	XP_022085065	Deoxyribonuclease-2-like protein	2.36211e-23	62.6984	106.686	Deoxyribonuclease II	3.6e-19	102.1	EC:3.1.22.1	6	F:GO:0003677; F:GO:0004531; C:GO:0005764; C:GO:0005623; P:GO:0006309; P:GO:0030218	C:obsolete cell; P:apoptotic DNA fragmentation; P:erythrocyte differentiation; F:deoxyribonuclease II activity; F:DNA binding; C:lysosome	Extracellular	Soluble	OTHER	0.000757
Sma_027419-T1	Proteases	2038	A8QL59	Zinc metalloproteinase-disintegrin-like NaMP (EC 3.4.24.-) (Snake venom metalloproteinase) (SVMP)	2.88e-60	49.7053	216.083	Q61072	Disintegrin and metalloproteinase domain-containing protein 9 (ADAM 9) (EC 3.4.24.-) (Meltrin-gamma) (Metalloprotease/disintegrin/cysteine-rich protein 9) (Myeloma cell metalloproteinase)	1.9e-64	48.1188	240.736	XP_020905912, XP_028516343	Disintegrin and metalloproteinase domain-containing protein 9	0	58.3643	1439.09	metalloendopeptidase activity	0	1260.4	0	12	C:GO:0009897; C:GO:0030424; F:GO:0008237; C:GO:0005623; C:GO:0005887; P:GO:0007283; P:GO:0006508; F:GO:0005178; P:GO:0007339; P:GO:0060468; C:GO:1990913; C:GO:0043025	C:integral component of plasma membrane; C:neuronal cell body; P:binding of sperm to zona pellucida; C:external side of plasma membrane; C:sperm head plasma membrane; F:metallopeptidase activity; C:obsolete cell; P:proteolysis; F:integrin binding; P:prevention of polyspermy; P:spermatogenesis; C:axon	Cell membrane	Membrane	SP(Sec/SPI)	0.874201
Sma_028228-T1	Pore-forming toxins	872	A0ZSK4	Neoverrucotoxin subunit beta (NeoVTX subunit beta)	6.34e-12	46.0251	65.4698	A0ZSK4	Neoverrucotoxin subunit beta (NeoVTX subunit beta)	1.5e-09	46.0251	65.4698	XP_028397642	p-loop containing nucleoside triphosphate hydrolase	0	61.5472	686.797	0	2.3e-138	500	0	0	0	0	Cytoplasm	Soluble	OTHER	0.000802
Sma_028882-T1	Hemostasis impairing toxins	319	D8VNT0	Ryncolin-4	1.33e-46	60	157.532	P22105	Tenascin-X (TN-X) (Hexabrachion-like protein)	5.39e-51	63.0841	184.882	XP_019640748	microfibril-associated glycoprotein 4-like	2.69238e-54	57.0397	191.43	Tenascin XB	2.2e-46	193	0	0	0	0	Extracellular	Soluble	OTHER	0.466979
Sma_028935-T1	Hemostasis impairing toxins	316	D8VNT0	Ryncolin-4	5.8e-44	60.3175	150.214	Q9WTS8	Ficolin-1 (Collagen/fibrinogen domain-containing protein 1) (Ficolin-A) (Ficolin-alpha) (M-ficolin)	3.33e-45	56.7568	159.458	XP_019853465	fibrinogen C domain-containing protein 1-like	2.35442e-54	57.8261	188.734	mesenchymal-epithelial cell signaling involved in prostate gland development	1.8e-45	189.9	0	16	P:GO:0060739; P:GO:0010628; P:GO:0030198; P:GO:0060740; P:GO:0007528; P:GO:0060447; F:GO:0001968; P:GO:0043687; P:GO:0014012; C:GO:0005623; C:GO:0005788; P:GO:0007162; P:GO:0008284; C:GO:0005614; F:GO:0045545; C:GO:0005604	P:prostate gland epithelium morphogenesis; C:interstitial matrix; P:mesenchymal-epithelial cell signaling involved in prostate gland development; C:basement membrane; C:endoplasmic reticulum lumen; P:negative regulation of cell adhesion; P:positive regulation of cell population proliferation; F:syndecan binding; P:bud outgrowth involved in lung branching; P:extracellular matrix organization; P:po…	Extracellular	Soluble	SP(Sec/SPI)	0.916946

## Sheet: Table S3_Proteome_R.esculentum
Accession	Sequence	# AAs	MW [kDa]	calc. pI	Exp. q-value: Combined	Sum PEP Score	Score Sequest HT: Sequest HT	Coverage [%]	# Peptides	# PSMs	# Unique Peptides	# Razor Peptides	Abundance: F3: Sample	Abundance: F4: Sample
Res_016558-T1	MKFPLLVLFATGALSAPFFDTTSFNAYFLEDDCSDPRLRDDATSIFSYAGETINTVQGSTSDSTGLKLKAVIYIHPLGACKYRMQMNNPELLVKSKNNDFQTAPESRKFSKELQAQDLVFQTSRGRINKLFPAAGESLHILNIKRGILSTLQLQKDAEEEVDVHGKCKVKITESNGVTVKSKDLSECSDRALNELGLQTATFAHSKMPIKPLNSKSVCEYITEMDKIIAVECEESHLFRPFSAGYKKPAGAITKVTQKLKLEGTKGRAGFAVETKSQSNPVTLIYGHEQESMKPDNYIVSRIDSVMDSLVKMGSLSAKQSSAHEFVELVNLVRKLDTKRMRPVMDKYFNFDASDANLKSAYRQFFLDALTYCGTPTCVSTVHDVIISGDVSGECRNMFL…	4308	491.9	9.42	0	3282.45	6647.32	65	338	2411	336	2	4.17433e+09	2.46689e+09
Res_015778-T1	MGFETCGPNEAMVVSGACHGKPSLISGGRTFVWPGIQRVQKINLNVMTLNVESVKVYTVQGVPISVTGIAQVKIQGQNMEMLHAACEQFLGKSTREVHQIALETLEGHQRAIMGTMTVEEIYQDRKKFSKSVFEVASSDLVNMGISVISYTLKDIRDEEGYLLALGMKRTAEVQTEARIGKAKAKMESGIKEASAEEQEMKAKLANDTEIAKSQRDYALKKAGYDMEVNTKKAKSDLAYELQAAITKQKIKEEQMQIKVIERTQQIELQEQEIARREKELEATIRRPAEAEKYRTEKLAQANCNRVILEAEAEAESIRMKGEAQAFAIEAKAKAEAEQMAKKADAWKEYQEAAMIDMMLETLPKVAAEIAAPLASCKKVTMVSSGNGAVGASKITGELL…	424	46.8	6.93	0	1148.72	5117.81	91	62	1679	62	0	4.14517e+09	2.51239e+09
Res_003510-T1	MSSLKVLEIEGKSLPNLEKRGKSDPFVEVEYLGSTKKTETKDDTLDPTYGEVFEWDLQGRPLGPEDCINVTVKDYERIGRNRLIGTATISLRDITRQGNNSKQVNVTLVDGQKRATSGKISMRIDYNPPKDAAEKQTGGADDRQQSEMGGEEGGEEGVEGEEGEGAAEGEAEATGGAAGGPAKKRRKKRRRGRQHNLPDKPTDFQVRIKVIEGRQLAGANIHPVVKVTLGKESKQTRVKSATNRPHFDESFFFNFNMRPNELFDQMINFEVLNSRKLLSDAIIGTFQCDVGLVYDEDSHALVRKWILLTAPEDKMGGTKEEEGDAKSKSRSSDGKQGGEPAGYLKITAIVLGPGDEIPDSVKAGGNDDSEDIEGNLLRPAGVTMRPATFLVKVYRAEDI…	2037	231.4	5.5	0	1018.88	1458.57	59	114	522	114	0	6.41852e+08	3.61462e+08
Res_014527-T1	MEADPDFKFLKVDRTSVGDPVAHAEWATKKLVWVPSEEHGFIAASVKEEKGDKVVCEIEGGRRQTYHKDDIQRMNPPKFEKVEDMADLTCLNEASVLHNLRDRYYSNLIYTYSGLFCVVVNPYKWLPIYTDNVVERYKGKKRHEMPPHVYAIADNAYRNMLQDRENQSILCTGESGAGKTENTKKVIQYLANIAGRHNSKEVKDQSGQVKLEVQLLQANPIMEAFGNAKTVKNDNSSRFGKFIRVNFDNSGFIAGACIDTYLLEKARVVRQAKDERIFHFFYQLLNGASAEVKKQFLLLDPKQYNFMSNANLLVPNMDEKQEFKNTLEALRDMGITQEELNAIFKIISAVLLFGNLVFKQERNSDQATLPNNEVAQKICHLLGMSIVDFTKALLKPRVK…	1946	226.4	5.55	0	921.112	947.31	45	83	286	83	0	1.63507e+08	9.0739e+07
Res_014664-T1	MGDEDVAALVIDNGSGMCKAGFAGDDAPRAVFPSIVGRPRHQGVMVGMGQKDSYVGDEAQSKRGILTLKYPIEHGIVTNWDDMEKIWHHTFYNELRVAPEEHPVLLTEAPLNPKANREKMTQIMFETFNSPAMYVAIQAVLSLYASGRTTGIVLDSGDGVSHTVPIYEGYALPHAIIRLDLAGRDLTDYLMKILTERGYSFTTTAEREIVRDIKEKLCYVALDFEQEMLTASTSSSLEKSYELPDGQVITIGNERFRCPETLFQPSFIGMESSGIHETTYNSIMKCDVDIRKDLYANTVLSGGTTMFPGIADRMQKEIAALAPSTMKIKIIAPPERKYSVWIGGSILASLSTFQQMWISKQEYDESGPSIVHRKCF	376	41.8	5.48	0	917.331	6596.97	93	43	2225	2	0	1.42349e+07	2.29503e+06
Res_014019-T1	MGDEEIAALVVDNGSGMCKAGFAGDDAPRAVFPSIVGRPRHQGVMVGMGQKDSYVGDEAQSKRGILTLKYPIEHGIVTNWDDMEKIWHHTFYNELRVAPEEHPVLLTEAPLNPKANREKMTQIMFETFNSPAMYVAIQAVLSLYASGRTTGIVLDSGDGVSHTVPIYEGYALPHAIIRLDLAGRDLTDYLMKILTERGYSFTTTAEREIVRDIKEKLCYVALDFEQEMLTASTSSSLEKSYELPDGQVITIGNERFRCPETLFQPAFIGMESSGIHETTYNSIMKCDVDIRKDLYANTVLSGGTTMFPGIADRMQKEIAALAPSTMKIKIIAPPERKYSVWIGGSILASLSTFQQMWISKQEYDESGPSIVHRKCF	376	41.8	5.48	0	887.661	6570.64	93	43	2221	2	53	5.95489e+09	3.45796e+09
Res_009077-T1	MEGNRLILAVLSCICIIASGKKIFNTGTECFKPSAARLVHCNWHYLAYMPRVLRAGVAEKVLVTTQNVDFDVTVEAKLLSTRSNDLIVAGKSVVKPGVLTEIVIKIPSSAPSWAIVQIEGRADVPAGTDGLAEDAIWTFKNKTGSINIQRSSTTVFIQTDRPIYKPGESMKMRVVAVDSDLKPLEGIISIVSILNPSQSLMRQWRQVKLYNGVASFKLKLSIKPVLGIWKIQATVKGVTKTVQVKVEKYVLPKFQVILKPPPYIALGQEKVYAEVCAKYSYGKNVAGLIAVEICAKFPGHYNRVWKKATSTCVVVLRKVFGCEQIEVNLNEFKVYQYSGYSSITFSFAASVTETATGIQYNATKVKSKVENTNVKLSFDGTPEIFKPGLPFQAMLQATR…	1663	183.5	8.88	0	861.356	1436.87	50	80	481	80	0	6.74626e+08	4.05082e+08
Res_015144-T1	MRTSLTILFLACATFSVFGDKEKEKKKDSVGTVVGIDLGTTYSVVGVYKNGRVEIIPNDQGNRITPSYVAFTPEGERLIGDAAKNQLTANPTNTVFDAKRLIGREWSDKSVQHDVKYFPFKVVEKSKKPHIVVDVNGEKKSFAAEEISAMVLTKMRDIAEAYLGKKVTHAVVTVPAYFNDAQRQATKDAGVIAGLNVMRIINEPTAAAIAYGLDKKEGEKNILVFDLGGGTFDVSLLTIDNGVFEVVATNGDTHLGGEDFDQRVMEHFIKLYKKKKGKDIRKDNRAVQKLRREVEKAKRTLSTQHQTRVEIESLFDGEDFSETLTRAKFEELNIDLFKSTMKPVKQVIDDSGMKKSEINEIVLVGGSTRIPKVQDLVKRFFDGKEPSRGINPDEAVAYG…	667	73.7	5.53	0	848.799	2026.6	64	68	668	66	2	1.1106e+09	5.69183e+08
Res_007055-T1	MDKRNSKGAQPDDSLFRIAPYFYLHVLDQNSNVTRVEVGPKTYVRQDNEKVVFGPEKMITIPPRHYCIVENPVLKDKTGKVILDEHGQVKLKHADLDVRLAQDPFPLYPGEELKQPPTSLRVVPANSALRLRAVLDFEDQSGEKKVAGDEYLFEGPGTYIPRKEVEVLETIRATVIKPNQALKLRARGETKDRNGNFRVTGEEWLVKKVGAYLPGAYEEVVDIVKATVLTEKKALHMRSTRTFTDDRGNVRKNGEEWLITFQDTEAHIPGIYEEVVDVVKITTLNNRQYCVIMDPVGKDGKPQMGQKKLIKGEKSFFLRPGERLENEIQSVYILGEDGGLILRAIEEFEEENKKIKRKPGDKWMIRGPCEYVPPVEVEVVSRRTAIPLDANEGVYVRDI…	848	94.5	6.24	0	823.531	1080.27	76	74	355	73	1	3.7302e+08	208120845
Res_006350-T1	MAQLLPIRFQEHVQLQNIGINSASIGFATLTMESDKYICVREKVGDTAQVVIVDMADPTNPTRRPISADSAIMNPASKVIALKASKTVQIFNIEMKSKMKSHNLTEDVIFWKWINLNTIGLVTETGVFHWSMEGGDSSPVKMFDRHQSLANCQIINYKTDSTGMWLLLVGISAQQSRVVGAMQLYSVERKVSQPIEGHAATFTQFKLDSNPQPSNIFTFSVRGAQASKIHVIEVGTPPTGNQPFPKKAENILFPPEADRDFPVAMQASQKYGIIFLVTKYGYIHLYDVETASRLYTNRISGETIFVTAPYEATDGIIGVNRKGQVLSVSIDEEKIVPYLIEVKRESHLPRRLAERCNLPGAEKLFELMFNEEFSLGQFSEAAKIAAKAPKGHLRTQQTI…	1687	192.6	5.76	0	783.57	951.39	52	77	324	77	0	2.71651e+08	1.63449e+08
Res_003725-T1	MGGYRTFLIFAIHLALLIAFTSSQNCDFERGTCSYIQSTNDTFDWSRQRGSTSSSGTGPSSDHTSSTSTFKIYTTGGNAGGAACVFPFLYNGVNRTSCTRAGSLRYWCATTNNYPSDQKWGYCAPAGWYMFIESSSPRIDGDTAVLFTPILPAGSKCLTFFYHMYGPHISSLSVYVTSDNSTLGTALWAKSGTQGNVWQNHTMTVSSSSPFQVGFEGKRGSDYQGDIAIDDISFKDGACNPVSSDMCTFETDTCGYMHDATGRFNWTRHQGQTGSSGTGPSSDHTKGTAAGYYMYVEASSPRKNGDKARMYKSYTGLASGGSCLVFWYHMFGADIGRLNIYVNSQGKNTSWNMIGQQGNQWAKGQITIPGTSGNVVFEGVIGNSYQGDIAVDDISVMNG…	5212	571.4	6.81	0	775.683	1056.32	28	98	370	98	0	2.92104e+08	1.51423e+08
Res_013273-T1	MGRFKWTVIVGLLLTLSFINQISCEEESRETPEENKEDLPKVEEDAGKSRDGSKTDDEVVEREEEAIKLDGLSVAQMKELREKSEKHEFQAEVNRMMKLIINSLYKNKEIFLRELISNSSDALDKIRLLSLTDKAALGATEELSIRIKADKDNNVLHITDTGIGMSKDDLINQLGTIAKSGTSEFLQKMQDAATEGAQASDLIGQFGVGFYSAFLVADRVVVTSKKNGSNQYIWESDASSFSVIEDPRGDTLKRGTQITLHLKEEARDFLEQNTVKDLIRKYSQFINFNIFLWTSKTEEVEEPIPEDEADKKDDAADDKKDDEKKDEGKKDDEDDAKVEEDKEEKEKKPKTKKVEKTIWDWELINMNKPIWLRKAKEVNDAEYNEFYKAISKDTEDPLA…	854	97.6	4.97	0	768.072	1527.55	69	81	572	78	2	7.1871e+08	4.44996e+08
Res_017557-T1	MGNLHTVGPNEALVVSGGCCGSENKKTIVGGYAWAWACVTDTQRISLEVMTLNPRCENVETAKGVAITVTGVAQVKVIKEHDLLKTACEQFLGKGTTEIEGILLQTLEGHLRAILGTLTVEEVYKDRDTFASLVREVAAPDVGRMGIEILSFTIKDIYDKVEYLDSLGKTQTAIVKRDADIGVAEAKRDAGIREAECERIRMDARYTADTKIANSNREFQMQKADFDQEVNARKAEAELAYQLQGAKEKQKIRGEEIQIEVVERRKAIEVEEKEIIRKEKELIATVKSPAEAESYKVETIAQGKKTQKVLAAQAEAEKIKMVGASEAAAIEAIGKAEAERMRQKAAAYKQYGDAALMALVLDAMPKIAAEVAAPLAKTEEIVLINDDSSGGGKLSNEIT…	431	46.7	5.55	0	759.414	2260.18	78	51	651	51	0	1.14762e+09	7.68037e+08
Res_001127-T1	MTSFTSVSGTERGGRFSSGSSGRETFVVLHIATIVPGKMKLFVFISLVLFLFYNGRTAVKASLNPRGRNVCSRQYTYNTYHPVPRQRVQYHNYRTCCKRKWGICLRRCTRYRTSYVTYYVNQLKVNQGTSYFCCTGYVRRGDACPQPVCRPPCENGHCSSPNKCFCRPGFHGSFCQHDINECQKNPCQQVCNNLRGSYSCSCRRGYRKVNSSPQDGKCQNINECLATNRLCTCAVGSTCKAQCVDTIGSYRCQCNQGYQLVNSKICTDVDECKTGKHQCEQKCVNSLGSFKCACNAGFWLRGDKKTCHDLNECRRGNGGCEQICTNIVGSYRCSCRSGYTLAYDKASCTDINECLKLKPCDKINGICRNTRGSYRCTCRAGYEIANKNQCKDIDECKGA…	2831	316.3	9.17	0	755.362	1139.15	34	102	468	102	0	5.3276e+08	3.24948e+08
Res_014221-T1	MDTKDGADFEGMQYLRQSQAQQLQDQTKTFDAKKWIWIPEQEKKGIEGFIPAVVKSTTGEKCEVETQDGKSYTVKKDDIQQMNPPKFEKTEDMAALTYLNEASVLYNLKARYTAAMIYTYSGLFCVTINPYRRLPIYTDDVINYYRGKRRAEVPPHVFAIVDNAYQDMLIDHENQSLLITGESGAGKTENTKKVIQYLAKVAGVEKKSKEEPAEKKNMMGGTLDEQVVEANPILEAYGNAKTIRNNNSSRFGKFIRCHFSQTGKLAGADIESYLLEKSRVVHQMSNERNYHIFYQLLYASSNEYQEKLLLPSREAKEYNFLVKGCYHVDGIDDHEEFQYTENAARVLGFNEEEKLSMYKICTAILHMSNIKLKQRPREEQAEVADPADGEKVGFLLGIP…	1944	224	5.85	0	736.486	929.11	41	73	370	73	0	3.60721e+08	2.13663e+08
Res_014382-T1	MKYFILLISVGLAFAEIKEEKDVLVLTKDNFDEAVNDQANIMVEFYAPWCGHCQSLEPEYAKAAKTLKDEGSEIKLAKVDATIENKLAEKYQVQGFPTIKFFKKGKPIEFTGGRTSEEIVSWLKKKTGPPAKEYTDAEELKTFVEGREVAVVGFFKNKDSDEAKKFIEAASGIDDVEFAITSCEQCLKAYEQEKDASVVLFKKFDDGKAVFDGEFNAENIKAFVGSERIALVTEFSDETAGKIFGGEIKSHILLFISKSAETFKETIDQFTDAAKSFKGKVLFIYINIDVEDNLRIMEFFALKKEDAPTIRVINLAEDMVKFKPEGNDLSADAIKSFVQNYLDGKLKPHLMSEDVQEGWDAKPVKVLVGKNFDDVVNAKTHNVLVEFYAPWCGHCKQLA…	522	58.3	4.74	0	721.231	1459.1	75	57	499	57	0	9.73985e+08	6.3947e+08
Res_001373-T1	MLISAFILASFAITSLDGSYFYIYKDFQSKGVCSYKGYMPGGGKPNISPIKPPTATMPANALAKIAGLGSKSAALAMHSSNLMKALGKGSALFLKIAPKLGPALGVFGAALGFVTAFTSPTPQDILNQANKAIAKLTAEVNDRLVKMEGYVDYKVIKLEKDLVNREYRSLFNLFGNCAKEATKDQVNECMRDAEMKAASDAPKYMILDTKMGAYTDSTKFRSYYDSNPSKAPSYYDVKRIEAGIISFRDYATLHLLMISTLLDTYKSDATLPNAAYYVTRYTREQASAAAKYAGYADWAYKWILSRNFGENRSNQFKKSCQNAKELKEGWFVPVRTAYYSHCSIQCTGMNTPANCDYRVLIRADGKRPSSYFSYYNSACGSCFSSVAVQYGLSVKGSQI…	514	57.4	7.91	0	703.058	1903.55	75	53	635	53	0	8.99146e+08	5.64761e+08
Res_005400-T1	MYRLQSLARPLARSTRSLVPRLGAGFSTSSKYESPKEIKFGADAKSLMLQGVDLMADAVGVTLGPKGRNVIIEQSFGGPKITKDGVTVAKAIELKDKYMNIGARLVQDVANNTNEEAGDGTTTATVLARAIAREGFEYVSKGANPQEIRKGVMLAVEVCVDALKKMSRAVTTPEEICQVGTISANGDAKIGELISSAMKKVGKNGVITVKDGKTLHDELEIIEGMKFDRGYISPYFINSAKGQKVEFQDALLLLSQKKISAIQDIVPALELANEKRKPLVIVAEDVDGEALSTLVLNRLKIGLQVVAVKAPGFGDNRKNTLADMAISTGATVFGDEAMDTKISEVRHENLGEVGEVVVTKDDTLFLKGKGDASEVQARCDQLKEEIESTNSEYEKEKLN…	583	61.9	5.48	0	701.732	1379.78	74	53	383	53	0	5.52451e+08	2.88403e+08
Res_005685-T1	MLRQGLRRLANGVVKPALLQRSVPTAHQRLLPACVESLKSRNVTTDTTKNKAAAAPSGKAELPKAAGAGNLGSIVAVIGAVVDVQFEGELPPILNALEVQGRTSRLVLEVAQHLGENVVRTIAMDGTEGLIRGQGVLDTGDPIKIPVGPETLGRIINVIGEPIDERGPILTDKRAPIHAEAPEFIEMNVNQEILETGIKVVDLLAPYAKGGKIGLFGGAGVGKTVLIMELINNVAKAHGGYSVFAGVGERTREGNDLYHEMIESGVIDLKGDGSKVSLVYGQMNEPPGARARVALTGLTVAEYFRDQEGQDVLLFIDNIFRFTQAGSEVSALLGRIPSAVGYQPTLATDMGTMQERITTTKKGSITSVQAIYVPADDLTDPAPATTFAHLDATTVLSRG…	538	57.5	5.5	0	682.447	1589.25	82	37	432	37	0	7.84606e+08	4.20033e+08
Res_001885-T1	MANDQEEEYYGYYYNEEEDKGLLDPAWERQQTKTFTAWCNSHLRKVNVQIEAINEDFRDGLKLMLLLEVISGEKFPQRPERGKLRFHQISNVNKALDFISKKGVRLVGVGAEEIVDGNLKMTLGMIWTIILRFAIQDISVEQFSSKEGLLLWCQRKTAPYKNVNVQNFHMSFKDGLAFCALIHRHRPDLIDYDSLSKDNPAGNLNYAFEVAEQHLDIPKMLDAEDMVANVKPDERAVMTYVSCYYHAFSSSQAAETAAKRIVKVLNVNQGNEQAMNEYENLASDLLDWINQVMPWLNNRNLDDNTLKGAQDKLEEFRNYNWNDKPPKVLEKAQLETIFNTLQTKLRLSNRPAYLPSEGKMINDINGAWKGLEDAEKAFQEWILTEMRRLERLDHLALKF…	886	102.2	4.96	0	670.55	1149.12	72	70	395	70	0	3.80589e+08	2.18353e+08
Res_002187-T1	MACNPPKYAELGKEARDLLNKNFYFGSVKLDAKTKAENGLEFSANGTHNTDTGKVAASLETKYKCSDYGVTFLEKWNTDNLLSTEITIEDQLAKGLKFTFDTSFEPNSAKKSARVKSAYRNEYMHSTADVDFDFAGPTVHGSTVVGYKGFMGGYQVSYDTANSKLIANNVSLSYKNGDVVLHSSVNDATDFQGSIHQKVNKDLEASAMLKWCSEGGSSSLVLGGKYQLDKDTSCKLKINNNLQVGLSYVQSLRPGVQLTLAGLINAKSLDQPGHKLGMGINLEA	284	30.8	7.44	0	670.494	2398.22	93	33	624	33	0	1.68367e+09	9.88959e+08
Res_013678-T1	MLSAARAFRQVIRGVSTSATSMGSLRIAVIGQSNFGAEVYKSLRTKGHEIVGVFTIPDVQGKADPLAQEAEKDGVAVFKFPRWQQKKVAIPEVVEKYKNVNAELNVMPFCSQFIPMDVINHPEKGSIVYHPSILPRHRGASAINWTLMEGDSKGGFTIFYADDGLDTGPVLLQKVVDIDPNETVDTIYNRFLYPEGIKGMVEAVELIANDCAPKVTQPKEGATYDKIWKKKQVAEIPWQRTGWELHNFIRGNDKLPGAWSMINGEQVSFFGSSMYYKDLPRKATEVVIEGLEKPALVHKDGMIITGTDGQMINVKTLQLGSGKMIPASKFGSTDDSQEELVLNDEEKELEKKIFKIWGGILNSSELEGSVDFFKAGAGSMDVARLVEEVKSNCAVELEN…	924	101.5	5.87	0	633.734	1104.57	62	52	340	52	0	3.77506e+08	2.07932e+08
Res_012662-T1	MGTFYAVAVLLAVLAYQANCLQNALTVDEAYRFSSTLQKHNAKDLEEAYHVVKALSALGKGVEEDYCSFASNNLKKDVKSIFYYSEIVKSLGCQNAVKSIDGVDEKDTNSISFAIAAHANLGLKVQDNLVKALEKAVKSDDSPASSANAFYAASLLPKETNLKFLTDLVEDIVAQADEIDNTILKFEGGLPVTAAVVRGVLALADSQNKASSLSAEQLTKFAQYFLQRKYVMDVKGIFDVATVLSKLSKNKFQVPVVVSVYKADRMTEKNRIYKVRVTDVMDNSIPDVEVVAKSVTSAAGDTVAENVALVKGPKDDYLIVKSEIAKGYIAANSYVYDFGTAERGIYTLTLNVEFKKNANVYIGGKDAELKAKVLSRITVENIEVGIADREQSASSKAIK…	634	69.9	8.53	0	627.219	917.21	71	56	294	56	0	3.49744e+08	2.03195e+08
Res_015764-T1	MAFLWAFVLLSVASSSSAQSYFVVAPNVFRLNVEETISVQVASPCNVELYLQAPGRAAMISRVTQNFQPGEPKVVKLKITEKNLPNLFGTAKIYVNLVVKAPGFHKVAPVLVHWKSGTVFIQTDKPLYSPGQKVKYRIIPVGVDMLPLKENVTIEVKNPQGVRVGRERNIAAWKNGFEEKELEVGTLPVLGTWTITAIFGYQNKVNSSTTFVVKEYVLPTFRVEIQPPSYITERQNRFNVKVSAKYSFGKHVKGTLRIEMLVVFENGREIKVEDRWLPIRGESVSSVRVGKLVAPKEIPSFPAGQRLKIKAEVTEDATGTKLRAKPVFVHIVKSPYTISFEKSPRFFKPSVSFRVTAVIRYPNKEPAPELRVKFEATDGNRQLHMVKESSNAAKTNNRG…	1668	186.2	9.2	0	626.135	1021.09	47	67	344	40	28	3.61336e+08	2.02824e+08
Res_011901-T1	MALSIGSMFLLGLAWSVAMGHAKEVNIALNMHAKQSSTYSYAYAQYAVDGNRNPQFTGRSCSMTGYQKHAWWRVDLGCEARVAMVRITNRGTSYGSRLSNFDIRVSNYDGTPTGSRVCRRYYGTMNQGSTTEVKCRRPRVGRYVYIMLRGTNYLTLCEVEVFSRIPKREITGNLALFKPTSQSSTYSGYDSARAVDGNRNPLASQYSCSMTGYNLNPWWRVDLRQTVVVRMVRITNRRASYGLADFTVLVGSEDRNPSGNERCIFYYGAAPLGSTFELRCTNEVEGRYVYIMENKKTYLSICEVEVFSVIPNNTNGNLALYKDAMQSKRYSSGYAAHATDGNLNTISGGFTCSISAYQQHPWWSVDLGAVEQVSMVRISNKAYYRKLQNFDIRVSNKCG…	804	91.5	9.86	0	589.514	1443.5	57	43	488	43	0	7.83468e+08	4.66881e+08
Res_009297-T1	MLTRRVASSLLRTAVRTVPKGLQGSLGAAAIAATKHYHTTPTQRASAEVASILEERILGTSSKAELEETGRVLSIGDGIARVYGLKNVQAEEMVEFSSGLKGMALNLEPDNVGVVVFGNDKLIKEGDVVKRTGAIVDVPIGEELLGRVVDALGNAIDGKGPINSASRARVGLKAPGIIPRTSVKEPMLTGIKAVDSLVPIGRGQRELIIGDRQTGKTAIAIDTIINQKRFNEAGNEKAKLYCIYVAIGQKRSTVAQLVKRLTDADAMKYTVVVSATASDAAPLQYLAPYSGCAMGEYFRDNGKHALIIYDDLSKQAVAYRQMSLLLRRPPGREAYPGDVFYLHSRLLERAAKMNDNFGGGSLTALPVIETQAGDVSAYIPTNVISITDGQIFLETELFY…	550	59.2	9.09	0	553.837	1408.78	65	46	470	46	0	8.63629e+08	5.19564e+08
Res_004074-T1	MELHTSHCAALVLVLVICNRIYEAQATETKDTEAILDGIITINKENGILMKPDSTGDDGGVFEGDILLHRRTKDIVFRGQRPLGFGATGFVEDLWPNRTVYYTVADEIMKEEGGQTLSAIKAAINDINTKTCIQIKPRTTEPSYVHFLKGGGCWSLIGRVGGKQQISVGSGCGHKGVVIHELMHAIGFWHEQSRPDRDKYVKVIYENVLDGYSSQFKKYDKGEIDSLGSPYDYNSVMHYGPRAFSKNGRDTIELVNATFPVKLGQRSGLSDTDIKQIALLYKCKEDPIDGKYGAWSEWLPCDVSCGGGIQIRSRSCNNPAPKSGGKYCEGVAVESRECNKFACTASCDFESGLCTWSNLNDDNFDWQRTKGRTPSPYTGPPFDHTKGNENGFYLFVESS…	1210	133.2	6.84	0	530.16	1117.19	31	38	348	38	0	4.21123e+08	2.42263e+08
Res_013546-T1	MDEMHENAMAVEDPTSTDAAWKKIQQNTFTRWCNEHLKCVNLFIYNLESDFNDGLKLVSLLQVLSHKRINRYNKKPTFRPQKLENIAIALKFIDDEDIKLVNIDASDIYKGNLKLILGLIWTLILKYQISMPMLDTDDEQGKTPKQALMGWVKSKLPPEVKCDNFAKDWNDGIALASLVDATAPGLFPEWEDLNPANKLDNARDAMKRAEDWLGIPQVITPEEITNPNVDELSVMTYVSYFPEAKVKPGAPIKQKMTDASKCRAWGPGIESEGVIANQAADFFVEATGSSKGKVNVSVLGPGRKQIDCEIIDNHDNTYSCRYVAPKPGIYDVHIRIGGHHIPDSPFRVNVSSDVDATKVYARGPGLEPTGVIVNRPAKFEVVTSGAGHGNVHVDIIDPK…	3279	353.6	5.49	0	529.283	603.34	28	76	241	76	0	1.10236e+08	7.33674e+07
Res_011357-T1	MREIVHLQAGQCGNQIGAKFWEVISDEHGIDPTGTYHGDSDLQLERINVYYNEATGGKYVPRAVLVDLEPGTMDSVRSGPFGQIFRPDNFVFGQSGAGNNWAKGHYTEGAELVDSVLDVVRKEAESCDCLQGFQLTHSLGGGTGSGMGTLLISKIREEYPDRIMNTFSVVPSPKVSDTVVEPYNATLSVHQLVENTDETFCIDNEALYDICFRTLKLTTPTYGDLNHLVSATMSGVTTCLRFPGQLNADLRKLAVNMVPFPRLHFFMPGFAPLTSRGSQQYRALTVPELTQQMFDAKNMMAACDPRHGRYLTVAAMFRGRMSMKEVDEQMLNVQNKNSSYFVEWIPNNVKTAVCDIPPRGLKMSATFIGNSTAIQELFKRISEQFTAMFRRKAFLHWYT…	444	49.8	4.86	0	528.083	1566.93	76	32	551	32	0	1.43203e+09	8.09365e+08
Res_006413-T1	MALANVKSRLAKFQEDIDEADNRTVTAKHEIREAQTRLEKTEGELGTHQRRIKLLEAELQAITERYEDVASKLDKVVTDSEGIETKRRELEENEMEGDERLQDTEEKVKEARHLLEENEVKLVEVNRKVVVMNHDIERVQEKASSHEERVNVLEQTIKSTTEYLCSLEERELESSDKEALNEEKIAFLEGQMKEAEVRLEAADRQVQNLERVIMETENERSAWITKRQNIEKEIADIEGMDDLAG	245	28.5	4.74	0	516.823	851.6	92	38	274	38	0	3.10704e+08	1.86899e+08
Res_011953-T1	MRPFKLLLILALVAAALCEHQTDVADFEKDESLTETSTDLNEEEPNNGISADTNNEVKDPFWHSRRRRRPYIRRRRSYVRRRRSYVRRRRSYVRRRRSYVRRRRSYVRRRRSYVRRRGSYVRRRRSYVRRRGSYVRRRRSYARRRSSYFRRRSSRITKPIKCIPNKFRYDSCGRRCTVANGRLVNCYRVRKDFESMSLTEQNRYVKAFKTISTRQPYKRTYDRLIKMHETNFETRIHQQQEFLPWHRWFNLQIENLLQKVDCRVTLAYWDWSLWSHDPWNSKKIWSVGQGLGGNGRRGDGCVTTGPFRVGVWKTTSGDCLRRGFNGNPPDADQVAVTLREPTFLKFEVMLRVNIHETMHCLINGTMCSARSAEAPEFFFHHSFIDKIWADYQKKGIKHK…	565	67.5	10.51	0	511.332	1075.15	40	39	453	39	0	7.88026e+08	5.02712e+08
Res_002445-T1	MAYPPPGGGYGYPPGGGGYPPSDPMYPPGGGAYPPVGGAYPPGGPAYPPTGGAYPPAGGMPPGAPNYGAPPGAGYPQPGYGGPPPAGFNTGPPMPQSSGYGGPGGYAPPPVSQPPVSQPYGAPQPAHPYQQPPGQQYGGQPGYQQPPAQGYQQPPTQGYQQPPPQGYQQPPAPGYQQPQAQQPKSQAYQPPAQGYQQPPSRPAAQPSTTSSAPPTSQLASMSLKMAFHGTIVPKSPFDAENDCETLRKAMRGMGTDEASLIEILVTRSNAQRVEIRKKYKTMFGKDLMNDLKSELSGNLEECLLAMMEPHKLYDAKCLRRAMRGAGTDEEALIDILCTRSNQEIQDIKQEYKNYYQRDLEKDCVSETSGHFKRLLVSMCQGNREENETVNIEKAKKEAN…	541	58.8	7.8	0	495.334	1104.96	58	42	387	42	0	7.35504e+08	4.42645e+08
Res_012874-T1	MRWMSGWILFIWLIFERSLEIENKPIVNEHGAEKRKEDKTFSILDKLSPERRECISIHVGQAGVQIGNACWELYCLEHGIQPDGQMPSDKTIGGGDDSFNTFFSETGAGKHVPRAVFVDLEPTVVDEVRTGTYRQLFHPEQLITGKEDAANNYARGHYTVGKEIIDLVLDRIRKLADQCTGLQGFLIFHSFGGGTGSGFSSLLMERLSVDYGKKSKLEFAIYPAPQISTAVVEPYNSILTTHTTLEHSDCAFMVDNEAIYDICRRNLDIERPTYTNLNRLIGQIVSSITASLRFDGALNVDLTEFQTNLVPYPRIHFPLATYAPVISAEKAYHEQLTVAEITNACFEPANQMVKCDPRHGKYMACCLLYRGDVVPKDVNAAIATIKTKRTIQFVDWCPT…	501	56.1	5.17	0	453.097	1261.34	57	32	433	1	0	1.06159e+07	1.26628e+07
Res_012870-T1	MRECISIHVGQAGVQIGNACWELYCLEHGIQPDGQMPSDKTIGGGDDSFNTFFSETGAGKHVPRAVFVDLEPTVVDEVRTGTYRQLFHPEQLITGKEDAANNYARGHYTVGKELIDLVLDRIRKLADQCTGLQGFLIFHSFGGGTGSGFSSLLMERLSVDYGKKSKLEFAIYPAPQISTAVVEPYNSILTTHTTLEHSDCAFMVDNEAIYDICRRNLDIERPTYTNLNRLIGQIVSSITASLRFDGALNVDLTEFQTNLVPYPRIHFPLATYAPVISAEKAYHEQLTVAEITNACFEPANQMVKCDPRHGKYMACCLLYRGDVVPKDVNAAIATIKTKRTIQFVDWCPTGFKVGINYQPPTVVPGGDLAKVQRAVCMLSNTTAIAEAWARLDHKFDLMY…	451	50.1	5.06	0	444.527	1223.28	68	33	418	2	31	8.33173e+08	4.90673e+08
Res_003504-T1	MTSKNQILRLLPLQYSHILDMNTNITSLRLGPGTFILQDNEQVVLDPVQMVKVPPGHYCIIQNPAKLPVPSGRQCELKFGQTEVRFHQEPFPLYPGEVLAGGSYSSHKNAIKKLPVIQPKHGLRLQALVDFESGSEKRAAGDEWQLEGPLTYYPKPEERIMDVVKPHVIQQGEALRLKAKQDLEDHKGVLRVTGEEWLVKDLGAYLPGIYEEVIGVEQGYVLTEDRAIRMTATINCTDALGKKRIAGEEWLVTVSDKETYIPEVGEKLVMIVRRTVLGKHEFCIIKDPIDKDGKPQLGKKVMKRGITTFFLHPGEIIEAGVQKTFLLNEDEALIICAMEGFTDDTFGKDPIERKPGDEWLIRGPIEYVPRVETTVKEKRRAIPLDKNEGIYVQDAKSGQ…	849	94.9	6.81	0	435.894	542.31	68	49	175	48	0	1.31211e+08	7.53313e+07
Res_013014-T1	MADEEVETFAFQAEIAQLMSLIINTFYSNKEIFLRELISNSSDALDKIRYQSLTDPTVLDTGKELQVEIIPMKDEKVLILRDTGIGMTKADLVNNLGTIAKSGTKAFMEALTAGADISMIGQFGVGFYSAYLVAERVTVITKHNDDEQYIWESAAGGSFTVKRDTENEPLGRGTKIILHLKEDQTDFIEEKKVKEIVKKHSQFIGYPINLQVQKTRDKEISDDEADEEEDKKEEKKEDEEDDKPKVEDVPDDEDEEGDKKDKKKKKTIKENYNEMEQLNKTKPLWTRNPDDITNDEYAEFYKSLTNDWEDHMAVKHFSVEGQLEFRALLFVPKRAPFDLFENKKTKNNIKLYVRRVFIMENCEELIPDYLNFIKGIVDSEDLPLNISRETLQQSKILKV…	720	82.9	4.97	0	417.729	608.37	53	36	193	33	0	1.24075e+08	7.7089e+07
Res_003122-T1	MTLVWFMAFCLATAVAKTHNEQKCLQNCLAFTDQLKRAGPDVLPAEEAKKMCINSVISSDSDECKKIVSYSRELQVLLKAGVPKRHACRKSCKTNVKGTAINFPRSEKSCKICKLVVQYVSLGIKMFKKTEGEIIDSVNHLCESLSSKKVQQCKKIVGYVDEIFKLVLKGLAPGDICIKLKFCDGILKPSLLPAFALESKTLMKTKENRPCQLCQVLRDTIYDSSSDAMSTAEGIEKAFKIICGARKQPMEKSCKDVIAMSKLMVIYLNAGVAKQRVCNTICIESTTKKAVRSENSCKICKQVVNYVSMGIKIFNQTEKEIIDSVNQFCTTFSRNQKQDGECQKIVGYVDMVFKMVLKGMDVSQICVQLDFCNQMESVLPFETRLTGLLKSFGNRISSY…	1052	118.7	8.95	0	409.902	2909.7	43	47	1497	26	24	3.54669e+09	2.14157e+09
Res_009276-T1	MPKEKIHINIVVIGHVDSGKSTTTGHLIYKCGGIDKRTIEKFEKEAQEMGKGSFKYAWVLDKLKAERERGITIDIALWKFETEKFYVTVIDAPGHRDFIKNMITGTSQADCAVLIVASGTGEFEAGISKNGQTREHALLAFTLGVKQMIVCTNKMDSTEPPFSEARYNEIVKEVSGYLKKIGYDPKAVAFVPISGFNGDNMLEESENMKWFKGWNIEKKTQEKTTVKSTGKTLFQALDSIIPPERPYKLPLRLPLQDVYKIGGIGTVPVGRIETGILKPGMVVTFAPANLTTEVKSVEMHHESLPEASPGDNVGFNVKNVSVKEIKRGMVAGDSKNDPPKEAKSFDAQVIILNHPGEIHAGYSPVLDCHTAHIACKFAELKEKIDRRSGKKLEENPQKV…	467	51.3	9.04	0	409.697	1170.12	60	33	389	33	0	7.15026e+08	4.11687e+08
Res_016405-T1	MDKQVLVFLAFLGLASAKVYFQDGFEDESWEKRWTYSTSKGSDAGKFKLSAGKFYGDKDKDLGIQTSEDAKFYQLTSKIDPSFSSKGKKLVLQFSVKHEQSIDCGGGYIKLFPADIVPDKMSGDSPYYVMFGPDICGPGTKKVHVIFGYKGNNLLTKKDIRCKDDEFTHLYTLIVNPDKTYEVRIDNEKVESGDLEADWDFLAPKKIKDPSAKKPEDWDDRAKIDDPDDKKPEDWDKPELIKDPDAKKPDDWDDEEDGEWEPPMISNPEYKGEWKPKQIDNPAYKGEWVHPEIDNPDYKEDPEIGQFDNIGHVGFEIWQVKSGTIFDNILVTDDIAEAEKEAKDLFEATKEGEKKMKDKQDEEERKKQEEEEKKRKEEEDKKKSEKAAEEPEEEEEDDE…	460	53.1	4.61	0	406.423	701.37	65	32	229	32	0	2.89462e+08	1.47454e+08
Res_003105-T1	MLKQKKYDWKDSNLALFGSDTEKKVKKDSAESEPAWQGAGQEVGIKIWRIVKFKVTDWPKEDYGEFYDGDSYIILNTYKKPDSDELLYDVHFWIGKSSSQDEYGTAAYKTVELDTFLDDKPVQHREVMNHESALFKTYFDQIQILKGGADSGFRRVVPDSPKTRLLHFKGTTLKNIVIKEIAAKRGNLNSEDVFIIDGFFELYQFNGKDADKDEKFRAAQYVQQLKSDRCGKVKTAVVLEEERTSSDHKALKMLRDGSSAKRQAPKPSDRKLFQLSDAAGNMEFKEIAAGKDINKSLFSSDDVFIFDRADHCFVWIGKNASVDERRNAMAYGHNHISGTDHAFIPISVVCEGKESAAFNESF	362	41.2	6.64	0	401.514	607.42	59	33	197	33	0	2.43277e+08	1.31568e+08
Res_014039-T1	MQTTDQEFEILVSTSGKFAAGTDAKVFIKLFGSDGESDEIELIDNTKGKRLFEAGSDDKFTVKVGKAIGIITKIAVRHDDSGHFSGWHLNKVTIKDITTSRNYNFHCNRWLAKDEGDKKIAIEIENLALQIVKVDQKDEKNRPLHNTIKFISKQLIVRRGQTFFIDVHLTRPYKPEEDNFYISLKTGNKPREFDKSFVHIPKVEEFDALNQKWAYKVIGMKENILNLEVNCPVDALPAKYEIAFEDDDYILYQHPNSLFILFNPWNKADDVFMKDDEDRREYVLRQHGVIYTGSSKYQSGKDWYFGQFEDVSLECTFYLLSLTKPSGRDSVIEVTRRMSSLVNSCDNRGLLVGNWSGDYEGGKSPLYWTSSPPIFEEYMKEKKSVKFGQCWVFSALLTT…	801	90.9	7.66	0	386.947	834.61	47	40	302	40	0	2.47354e+08	1.31512e+08
Res_000891-T1	MTGIKLLFSVFYISLAWKFSTGSTINDKIVISKAERAIDISSQIAKVSAELTLENTGSEACRSFLVAVSSKQADHVAYFSATLKGKNEEDDEKLKFKETTVPTNKNDLFFEVELSSALAPGKSATVNIEKVYTHMLTPYPASIGQSDKQLVIFNGNHYIYSPYTIKTQTTTVKLSSSSIESHSKLKPTSVSESIVTYGPYNDVKPLSVDSMKIHYENNSPFVSVVEMTRLIEVSHWGNVAVEESFTIKHVGALLKGTFSRYDYQRTQTHAAVKSLKVALPAAAKDVYYRDVIGNISTSNMLVQEEAVELELRPRFPLFGGWKTQYYIGYNVPAYEYLFNRGDNYGLKMRLIDHVFDDFVIEKLTVKVVLPEGVKDIKVKTPFKVSEEKREVHHTYLDTA…	602	67.8	7.91	0	382.124	835.35	55	28	256	28	0	3.57693e+08	1.85348e+08
Res_002177-T1	MLRTSRKLQALAPSHVSAFGLRHGARVVGTRLLSAAAPDAEGEPSFLEMVNLFVENARELALQRLTTKPPPPGRRQDPPDQKRAFVKGILDIIQPCNATVGLSFPLNKDNGELEIIRAYRSQHSHHRLPTKGGIRYSSDVDEDEVKALAMLMTFKCAVVDVPFGGAKGGVKIEPSNYSEKELERITRRFTVELAKKNFIGPGVDVPAPDMGTGEKEMSWMADTYAMTLGFGNMNSHACVTGKPISQGGIHGRISATGRGVYHGIDNFIKDEHYMSLVGLEPGLAGKTFIVQGFGNVGMHTMRYLHRFGAKCIGVIEKDGSLYNGDGIDPKELEDHKLATGTIFGFPGAKITQEDLITAECDILVPAASEKQITSKNAHKIQAKIIAEGANGPTTPAADK…	540	59.4	8.18	0	379.551	554.67	51	26	170	26	0	1.97312e+08	1.12986e+08
Res_005798-T1	MAERRTELFTLAKLAEQAERYEDMVKKMKELTELGGDPLTEDERNLLSVAYKNVVGARRSAWRIIKSIEEKGADKGDETKKSIASEYLVQIEKELEEKCNEVLKLIDDHLLSQSKEPEARVFYRKMKGDYYRYLVEVSEGSVRDERADLSFDAYQDAFTIAQSDMDTTHPIRLGLALNFSVFYYEIKNDPGKACELAKTAFDDAISQLDSVKEESYKDSTLIMQLLRDNLTLWTSDADADEGQD	244	28	4.79	0	378.332	731.88	80	26	240	24	2	3.86788e+08	2.20073e+08
Res_004538-T2	MFQQQIDAVKEELRQHAPKRKVLQKLDMFVLDNSLRETTVGQLRGHTIENKWQIYNEIKRVGFKHTIVASFSHMTRLGDTFIRQLAEKGEDFSNFYAFSEFLEKITNKIPNTDLMPIGLLKMKELGIKHAIIEMDLVYNGIDYTVFTVKKICQHLEKLIKWCHSNLAEDSRVLINLRDLPDAMVKKPRRVFKIVNFLSSLPKHLRPFALITEESGKFFPEQLGVWISAIRKEMNRCGFTEGHLLVHVHQQWGMLEHTQLECLANGADGIWAGLCEEGASMGHASSTVTLLNMIRLGNKKVLKKFNCTELRKAAINVTKITTGLPPHPKQPIYGERALDLVFGMDQFTPDEKVFSLQTFFGEEAVMRMTTLANPNMVVLRLQRLFGNDPQFTVDMAKKML…	595	68.2	6.2	0	373.372	468.71	57	38	181	38	0	1.61719e+08	8.05577e+07
Res_004524-T1	MTARLLNSIGKLGIGVAIAGGVLNSALYNVDGGHRAVIFDRFQGVKPDVSGEGTHFLIPWVQKPIIFDIRSRPRNVPTITGSKDLQNVNITLRILYRPVASQLPKIYMSLGEDYDERVLPSITAEVLKAIVAQFDASELITQRELVSQKVQEALVERAHSFGLVLDDISLTHLTFGKEFTEAVEMKQVAQQEAERARFLVEKAEQQKKASIISAEGDAKGASLLSSAFEEAGEGLVELRKLEAAEEIADRLSKSRNVVYLPEGQGVLLNMPAA	273	29.8	5.73	0	367.603	611.98	93	28	169	28	0	2.86443e+08	1.54694e+08
Res_009236-T1	MAAFARSSKELTKLTKFRSRILQNAVKSLSSSTVDRADSSGKARLNKKLKDEADTVIIGGGCVGASIAYHLAKQGQKDVVLLEKSELTAGSTWHAAGLVTLYHPGINLKRIHYYSINLYAQIEAETGQQVGFHRPGSLRLLTTPGRVDEAKYQLQRQGWHQSPMTLLSPTEVQELMPIMNCSDVLGGLFTPDDGHIDPYSLTQALAIGARMHGAEIYMPAPVTKLNQLENGKWEVETPHGTIKANRIVNAAGFWGQELGRLVGVEHPITPIHHQYVVTTTIPEVKELKREIPVVRDLEGSYYLRMERDGLLFGPYEEGQKMRLQGEWWDGVPDGFGKELFESDLDRIMDNVNSAMDRFPCLQTADIGSVVAGPITYTPDILPMVGPFPEIHNYWLALGF…	866	96.4	6.58	0	365.782	526.9	45	38	182	38	0	1.49602e+08	8.57792e+07
Res_003530-T1	MAKLFAIVALIVLVFQQNSNAETKEEAKKIDLGKDVAWKRLEFAVEDAAIDNKLILLFISKSWCKPCHKLADDFLKNEEFKVLSKEFHMAAAIDDNAPMDPKYDIDGKYAPRIIFQDSQGNVLSGITNGGQKTRYFYKKADQVVESMKKALAKTSLDQGFGKDYAWMSYDSALEEAKRSGKAILLIIHQDWCGACQRLKPKIADSKDLLEKSKSFIMVNSDEERVVKKKDFDIDGEYYPKIVFLDNNGEILKDHWNLETEHKHVKFYYGEPEELIKSMDRVLEHMATVKPSLDRGMGTHIDWKPYEEGLAIAKNEKKPIMLIIHKSYCGACKALKPRIRQSKELAELSKKFVMINCLDDEEPTDAQFDIDGAYIPRIFFLDSNGIVEPSLKNEREDFKK…	879	101	5.87	0	361.689	384.94	56	43	152	43	0	9.9433e+07	5.61912e+07
Res_009365-T1	MEQIKKKMAQLKRTQEEAEARAKKAEDELAETNAKATAAEEDVSRLIQEMEKLEEELDATESKLSATLQKLSEAEKQADESERARKVLENRGLSDDERLTRLDTELAELTAKNEAVELEYEETCNEIRKLEETLDEAESKSEEYEGRVKELEAEAMLVGNNLRSLEISEGKASEREDTYQAKLNELSDKFQDTDAQAEVAEARVRELEDQLNQLEAEVMNEKELYAKIKRDYDAALIELTDM	242	27.7	4.46	0	361.639	1123.23	69	21	309	21	0	6.71209e+08	3.13258e+08
Res_005316-T1	MAKTQAIGIDLGTTYSCVGVFEHGKVEIIANDQGNRTTPSFVAFTDTERLIGDAAKNQVAMNPSNTVFDAKRMIGRRSDDPNVQKDKKLWPFDVVDEGGRPKIEVVYKGETKRFFPEEISSMVLTKMKETAEAYLGKKVDNAVVTVPAYFNDSQRQATKDAGTISGLNVMRIINEPTAAAIAYGLDKKVGTERNVLIFDLGGGTFDVSVLTIEDGIFEVKSTNGDTHLGGEDFDQSMVHHFVEEFKRKHKKDISSNKRAVRRLRTACERAKRTLSSSKQASIEIDSLFEGIDFYTSITRAKFEDLNMHFFNSAMEPVSKALKDAGLGKDEIHDIVLVGGSTRIPKIQDLLSNAFNKRELNKSINPDEAVAYGAAVQAAILSGDKSEQVSDLLLLDVAPL…	657	71.4	5.38	0	358.564	560.2	52	33	183	31	0	9.27178e+07	6.14659e+07
Res_009165-T1	MDAWKLIARVSILLLLPALAESGKRYLIVSPAVYRTGNNVVLSATLFGLEQRAILVTNIKLNDELKLSKITIFQPEDSGKPKDIILKLPSDVKAGQYKLVVTGSGDVNFKKSRDITIERSSESLFIQTDKPAYKPGDKVRFRVIVVTPQLKPAAGKVDEIAILNPSGSRILQWKEKDLDEGFVSLDFSISKKPVLGNWKITAKYQGNKKEVIIKVDKYVLPKFEVTVEEPTYLHRSISKFSARICAKYTYGKKVEGKVTTRFCYKYGWRNSRQKQQCVVISKKISGCVDFDVSMIQTQKWKTALLVNASVTESSTGTTLNATKELQLTYSEFSLKFSGVSEFKPGFPFKGKVLITYPDGRPALNKEINLKATCCRTKTLINTRQTAVNGVIDFVLIPPL…	1441	160.9	9.14	0	354.704	382.55	45	49	158	49	0	8.95157e+07	5.15903e+07
Res_013881-T1	MFMTRRVKALSSLSKDCLQLPKLSRHYVQATQVPVTECLDDSLVNRGTPKEPELKVTKLDNGVQIISINSDGGVSKVSVYIKAGSRYEDPSNLGITHFLRNSAFLTNKSKSSLRATRELQQHGISLGVTNSRDHFIYSGSCMKDSVNPMLEIIASSVHGPLFQSWEIKNADDLCAIDRSNLEAYLQLGVLDKLHGAAFRSGLGNSIYCKEHRSYSGEQMSEFIKNNFVGERMSVVAIGCEHEALVKDVSVTLGSIPRGTVVSEGKQKYFGGEIRMDNESKLNHVALAVEGPSHVSKDLCTYGVLQHMIGSGSFIKYGSNTVSSRLNKAAASVSESPFMASSLNICHSDKGLFGFYTITDPKDTTQVVRAAVNEIKAVAKGKITDEEMARAKNQMKAAAL…	470	51.1	7.69	0	350.783	563.2	73	30	171	30	0	2.10171e+08	1.12429e+08
Res_011955-T1	MKTLLVFFGFLALAWCNHEAFDEDEFNDVNRDAFTVENRLNDFNQIDDDDDDEDEDEKQKKPCILTNKYRYDHCGRKCHVFNGRLVECTRIRKDFESMSKAEQIRFIRAFKIISTHRRYRPAYVRLIKLHEKNFMKGIHTKEQFFPWHRWFNLQLENMLRKVDCKVTLPYWDWSIWSHDPWNRERIWGPVYGLGGNGRKSDECVTDGPFRVGSWKTASGHCLKRSFNGKPPDADEIAIATKEPNFDKFEVMARITIHEGMHCFINGTMCSGKAAEAPEFFLHHGFVDKMWADYQKQGSYHKNAFFPSIKKKMTVTKYYPKDLIDNLSLPGGVRVEYQDPTTNSAKKIRNFLRVLSFKQLEHLQRLAFSQNPGSAKKLFNLSANERKFAAGLEKESMQNV…	429	50.2	8.87	0	349.042	594.98	47	33	212	33	0	2.87702e+08	1.6278e+08
Res_009647-T1	MLLCYGSFVFFLAVASASDVLEYTDSNFDSEIKDKEIALVEFFAPWCGHCKRLAPEYETAATKLKKNDPPVPLIKVDCTEGGKETCGKHGVSGYPTLKIFKNGKMTQDYEGPRQADGIVGYMKKHSGPASKEYKDLDKLQNRLADAEDNLIVGFFSEEDNTMHKRFAKAADNKRNDFDFAHTFAPEILKHYNYENAIVIFRPSHLHAKFEDPFVAITDPEESVLNIERFIDDNQFGMVGQVRGNNEAKFMKPVIIAYYNVDWRRNKKGTQYWRNRVARIAKKFKGKPISFAIANKGEYTRQIDDWKLDQTQDVLVAAKNAQGEVFLLKDEPFSVANLEKFVNDFVDGKLKPYIKSEPIPENNDGPVKVVVGETFKDIVLDETKDVLIEMYAPWCGHCKS…	493	56.1	7.21	0	346.027	950.24	59	32	309	32	0	3.30848e+08	1.6837e+08
Res_007579-T1	MLGEKLLLAKILASLLALLVVLPETESIAVMSIDLGSEWIKVAIVKPGVPMEIALNKESRRKTPNAVAFKDDERHFSDPALGVAVKKPENSYLYLTHLLGKKYENANVELYRSRFPHYNLVKDEERGTVLFKTSDTEKLCPEELMAMILNNSRQIAENFADHPMKDVVLTVSAFYTQAERKALIDSAKMVGLNVLQLMNDNTAVALNYGIFRAASFNSTETHVMFYDMGATSTTVTIVGYSTVKTKDRGYLETVPQLAIKGVGFDPLLGGLEMEFRLRNQLVKLFKEKIKTEGDIEKNPRALMKLLKEAARVKRILSANTETFSQVENLFEGHDFRAKVTRDEFEEMCKDLFDRVSLPVETALKAAAMQLSHVDTVMLMGGGTRVPKVQELLKKAVKRD…	1020	115.1	5.97	0	335.663	357.19	40	37	119	37	0	8.11353e+07	4.6104e+07
Res_004281-T1	MLPKCLRASLFILLILLIGKSSASSATQLNSSNYQTFLDTNKVALINFYAEWCRFSQMLAPIFDQAAAIIKEEYPDSAALGKVDCETEHQISSDNAISKYPTLKIFRNGKPMRKEYRGQRSVDAFTNFIRKEMKPSVKEYHSKEDFTPDTKRNSVFGYFESRTSEDYKVFEKIADELRDDCDFWVGFGEASQKERALGDGVVFRAKQTPVDQDLIYTGDLLKSELLKAWVNDKCVPLVREITFENGEELTEEGLPFLLLFHRPEDTESIKKFKDIIAKELYHEKERINFLHADGTRFSHPLHHLEKSEQDLPMIAIDSFRHMYLFPKFEDINTPGKLQQFIDDLHSGKLHREYHNGPDPTEPPQIEVHEEAGEGDAQVEQKTEHPDKASQEQAGSTYDE…	432	49.5	5.44	0	335.637	662.25	55	30	241	30	0	3.20749e+08	1.94511e+08
Res_002633-T1	MKLVTIAAIAVLICFGQAVDARQSKKYMAKAKISTPKMIENPLKIHLADSKDLTEEDDTHSGSKREGRGRRGSTTNVNVKSCNANFCDPGWEPYPNIVSAMTGYNILKGNAYNFGTEQDPGFDNGYIFVPVVKDNDDRYTLHDGVTVRAISKCDLTLTTKSISTVKAFQKMNRKIEGMHEGWKTNPPVEVSFEGKGVGVSTELPPLFEAYGTANLDQRKNEEFFVRRQGVLTVSAATCALYSMRISRRFPPPFKSTFQNAVKTLSEATERDRKKEFHRFIQDFGTHFLQQATIGARLSILRRYSRATFQNAAAETIENCSKGRLSYFYVKEEGKNNCSKLDNADKTTIFNDIEREYIVSYGSRPEKSLTEWANQEFDYPVPIRMNLVPIIELFHDDFMK…	649	72.8	7.4	0	327.649	514.42	45	30	169	10	21	1.83795e+08	1.00889e+08
Res_013542-T1	MASSVVRLVGKSAKNLRPFRGNLLQKRFESLSAYEKSLYNVPETKVTVLPNGFKVASENSRISTCTVGLWIDAGSRFENEKNNGVAHFLEHMAFKGTKKRSQVDLELEVENMGAHLNAYTSREQTVYYAKSFSSDLPKAVDILSDIIQNSTLGETQIERERGVILREMQEVETQIEEVIFDHLHATAYQGTPLGYTILGPSENVRKISRNDLREYIDKHYSAPRMVLAAAGGVDHDELVKLAEKHFSGLRSSYSETERLNPCRFTGSEIRIRDDEMPYAHIAIAVEGCGWAHPDYFTLMVANMLVGNWDRSMGGAKHMASPLAQVVSQNDLAHSYMSFNTCYTDTGLFGTYMVTDRMKIDDLLFNVQSEWMRLCSSIKDSEVERAKRLLKTNLLLQLDG…	751	84.3	7.33	0	327.114	486.27	42	31	155	31	0	2.02799e+08	1.06602e+08
Res_007741-T1	MNTMARTSLVILTVLISSCYAAFRWELAAYSQELGDTVALKCLSDDAATFEVYHKGVKVVTGGKYTVTSYTYEIDVRLTGVGIDEAGEYECRVSGSTEVQKTRVMLKANYPDNGKTFYKTLGTRSTVPFSIIAYPRPEIEYLIVNAVGTKTTVAKAGSRGDMRVGGDKYSINSTNGHLVIFSVQKTDGGKYAVQSVGAGSQKNGEFTLVVGDKPQITTAPDALYKLVSGKAATITCKFDKEPDTVKWEYTPKGGAKVEITKVSSSGGLSLDGTNLKIASVDVKSEGATLTCIGSNRFGETKASSKIETVFVTPKIEPLVNIDIAQGKSKTLVCKASGNPAPQVTWHKMVDKTFSKIDGQKQKPGNSTYTIASASLSDAGTYKCMALLADMASLNNSATL…	801	85.4	7.93	0	321.1	545.62	43	31	184	31	0	1.87882e+08	1.25268e+08
Res_009616-T1	MASSFVRRSVNLAGGKIVFSEGKAVKNPQKLFAASYMSGTGKRRAMPVNTVIKFVPQQESWIIERFGKYHKTLMPGLNFLIPVIDEIKYLQSLKEIAIEVPQQSAITRDNVTLHLDGVLYFRVVDPYKASYGVEDPQFAITQLAQTTMRSELGKISLDEVFKERDTLNHSIVEAINSAAQVWGIKCLRYEIRDIQLPTKVKESMQMQVEAERRKRASILESEGQREAAINRATGEANAILAKARARAEAINLISKALSEKSGNQAASLSIAEQYVQAFSSLAKTNNTILLPSNTGDVASMVAQAMAVYGKIATLPASEDAPPDDDPSTPSTTGGDRGKKQPSKESHSTSSTVSKTGASLGAASLLGSKDDFLFSVANSPTRKREFGLGELD	391	42.5	9.11	0	317.532	500.73	68	29	156	29	0	1.68153e+08	9.48274e+07
Res_006369-T1	MLFYAAVLFWIASSISNSEQSKTVGVRLNGKILAVGTDNYLWMRRGTAKSFQWIRVPGSCCVTQIHILSNGHILAVGTNRHLYIKKSLNGKWHHVPSSCCVKDVTTFKTKMCSREVIVGVGMNGRLYSKKTLNSRWVGPYAYSGTVKAVAGVSGQIYGIGMNNYIYKRPGLKGRWKIIPGSCCVKDIFVRDDIYTHLTYAVGTDNRLYTTALKDAKKVIWKFRGKHTCCIKSVHVKERPVNVKVLAVNNKNRLVFKESLNSGWYTVSDIKKLTKIVVLRNGNLLGIGFDRKMYIKSSIDSSSWRQVPRSCCVKSVAQLLDGRIIGVGMRNKLWIKIGLNGRWIPLSRRGSVTSITVDNYDRIIGIGMNRRLYVKRCFDPDWKGPLKYSGGTTDISFGKD…	439	49.4	10.21	0	316.763	1173.34	57	34	394	34	0	5.09967e+08	2.67301e+08
Res_009569-T1	MVNFTIDQVRVIMDKRHNIRNMSVIAHVDHGKSTLTDSLVTKAGIIAQAKAGEMRFTDTRKDEQERCITIKSTAVSMYYELNEDDMKFISQEKQGNGFLINLIDSPGHVDFSSEVTAALRVTDGALVVVDCVSGVCVQTETVLRQAISERIKPVLFMNKMDRALLELQLEQEDLYQTFSRIVESINVIVATYGDDEGPMGTISVDPSIGTVGFGSGLHGWAFTLKQFAVIYAAKFKIEPAKLMRRLWGDNFFSPTEKKWKKESASGYVRGFCQFILDPIYKMFDAVMSHKKDVYNKLLEKLEIKLSSENREKEGKPLLKLIMQKWLPAGETLLQMITIHLPSPVTAQKYRMEMLYEGPLDDEAALGIKNCNPDGPLMMYISKMVPTADRGRFFAFGRVF…	840	94.1	7.09	0	315.063	365.32	47	34	132	34	0	7.97478e+07	4.47133e+07
Res_011132-T1	MIIPICVGHNSSWASRVGRGEHASSLGCQHDHLFYASDVQLPGTVPISIGHAGNGEEWRHTVVQSANSAGNGWTHDFTFYAFSSQQPGTIPYAVGHATYEHGWKFRLQENATYVGDHGWTHGFVFYVFPVNPEVLMPISVGSYSGHWTAKVVSGVSAKDDLFDHVFTFKALEHQQPGTIPFAVGSAGSGDHRRHQLCKGTNAGGNGWNHEMVFYAFENQKPGTIPIAVGHATYSGGWKFRVSENCSFAGDNGWTHDFVMYAYPADTSLLMQVAVGCDTEQWCSWLKAGPRVQDHYFQHTFSFYGFRSPYPGTVPLSVGEAGDPYSRSLRSRIDQGTHAGGNGWNHVLTVYVFPSRKPGTVPIAVGHADFQKGGWKYMVSENCQNAGTQGWQHDFVVYAY…	403	44.2	7.06	0	315.03	893.41	63	15	222	15	0	9.13329e+08	4.59277e+08
Res_005123-T1	MKHILLIFCFIFAASNSFVESALSDKPKIVTTDGHLKIQSAANRNISLETDASGDVNLGGTSVKSMLKTISSLKDQVTRLKQQVSQGGICAQDNTGNSCGAHGVCVPTTAAASNGTGYRCICDPGWQGTKCDKRISTNPCGNVLCLNGGTCENNSGAPVCKCINRFFGPRCNLQQPTTCNKNLSDDQGIVSSSGYPDAYPPNADCTYRIHSNPGTIIHLSFSAVSLENSPSCTKDYIEIRDGAAASSPLLKKVCSPLSSIESTANDIYIRFVTDGSNQIGAGFSLYYFVKKSGVCGDTLTSDSGSISSPSWPSSYSKATSCTWLIKMPSTERVSYTVSQLVISGSASTCSSYLELHDGPTESSPIIAKLCSHTTLPSAITTSSNLFVKFVTDGSGSLFK…	3205	345.4	7.96	0	314.368	375.21	21	52	173	52	0	1.30975e+08	7.82961e+07
Res_007221-T1	MYILKSIFLVVLATTICEGVKWKELKKTLRFARNGPEPGERRDVITIDSREELSNWPKHEPDVGSFQNIFTEARKRAKRSTPGTPSKNKFHFNDSHYVAEVHWAGSNSSVMLVLMRDPTPSPKRPNYFYVSTDYGKNFLNITHKFIVNGTLPVLNDYYPSPINNQHYIITAKFHKYIFISSDGCNTFRTVRVPFTPTKIKFHPTYYRYLLAYDEDHPMNKLYVSKNFGASWLFKSNYVRSFYWGIQPYDYSSQFYVERRLPGQRSTIMRYNYWYWYPRTLITNVEDFDLQDKYMFVSQRNTTMGGVHIQISYKRNSFRMAQIPQERKDPALSYVFGDASEDQLFVAVDHNSSASLYISDRTGLVFSESLERILYHNKDYNPTLPVRSSLNQSFIDLYRV…	1707	194.1	7.88	0	312.188	321.9	27	40	132	40	0	1.15578e+08	6.40544e+07
Res_005471-T1	MWLFKAVLLTLFISSLFCEDENVVNDPATEKEESDIAEDTPSSESEESSEVKEENGVLVLTTGNFDDVINKHNVILVEFYAPWCGHCKTLAPKYEKAAQRMKNESPPVPFAKVDATVESDLGSRFEVQGYPTLKIFRKGQAYDYDGPREEDGIVNYMKEQSDPNWKPPPEEVITLTKDNFAEVTSREDLMLVEFYTPWCGHCKRLAPEYEKAAKVLKNREQPILLAKVDATQEGELAKQYGVTGYPTLKVFRKGKHSEYKGGRDQTGIISYMEGQVGPSSKLKPTLREVKEFMKQAIDDFVVLGVFSDENDPLYTTYLETNNDLRDDYAFGHTFDGQAKKHFSIKESSIIIIHPSHLTSKYEPKYQIFKDSKGTQADIQNFYEKHSAPLVGHIQSHTEK…	635	72.1	5.27	0	311.179	329.07	52	33	115	33	0	6.54596e+07	3.81137e+07
Res_004351-T1	MPALLMRGGLQTKIHSSIFGARSTLASRSKSLDRLKSTKNKFYSKNAALKKVRDRKVATLFLEDGTKMKGYSFGKERSMAGEVVFNTGLVGYPEAMTDPSYRGQILTLTYPLVGNYGVPSTTDRDQYGLLKYVESENIQVSGLLVQDYSHSHSHWNSQQSLSEWLVQDGVPALYGIDTRMLTKIIRDKGTVLGKIEFEDQPIEFDDPNTRNLIAEISTKDVKVYGKGNKYKIIALDCGIKQNMIRNLLVRDAEVHVVPWNYDYSKDDYDGLFLSNGPGDPAYVDSAVRVLRKVIKDERKEPIFGICMGNQLTGLAAGANTYKLPLGNRGHNQPVLNILNNKAYITSQNHGFAIDEKTLPEEWIPLFRNANDRSNEGIMHRDRPIFTAQFHPEHFGGPTD…	1513	167.4	6.33	0	310.551	280.66	37	45	118	45	0	8.89322e+07	5.05896e+07
Res_010275-T1	MDTCNCMKTAILISAFFFVASSEVNNAGKTLVLLENAHVRETHSIFFKFLQDKGFELTYKLADDPDLALQKYGEYLFNNLIVFAPSVEDFGGSVDVAAITKFIDDGNNVLIAASSSIGTPLRELGSECGIEFDEEKTAVIDHHNFDVTDDGQHTVILADGKNAIKSRNIVGSGNENPLLFQGVGMVADQDNPLTLEILSASSTAYSYYPDDKISEYPHAVGKSTLLIGGLQARNNARVIFSGSFDFFSDKFFLSGVQNAAVSDSKFYPVSGNAELAFNLAMWIFKQRGVLRVVGVDHHPIGELSPPMAYTIEDQVAYKIKIEEFHEGKWQPFQASDVQLEFFRIDPFVRINLNSSSDGTFSAEFKLPDVYGVFQFKVDYDRIGYTHLRSTTQIPVRPKM…	443	49.4	5.21	0	308.639	795.04	63	24	244	24	0	5.06505e+08	3.08121e+08
Res_005354-T1	LVCGECPSDWFINGQYCYHFHDITYSTSGMSWNDSRLACQRYGGDLVVIKDAAEQQLIARRMTLAQRRQHYWIGLTDAAQEGTFVWIDGTSLAATGSHWRTTSGEPNNWGGNEDCAELNNDGLWNDNSCSREFAFICKKDKDTPIPPAPTLPPRPSSRPITCEAGWHGLNNSCYLFQKEGKTWAEGRAECQLRGGDLAIVDSQSEHNFLTNFIQRDNMGYWIGLTDKNTEGNFFWVDGSRLNNSVAFWGTNEPSNAFGGEDCVEMWTWWDTGRWNDNKCAINRHFICEKVSGKSMCPEDWATYNGMCYQINAHPEQKKTWLEANAACQAFEGANLVSIHDSVTTRLLTQEFHSVFTRTGFFWHGLNDINSEGQFEWTDKTKFVYSNWGRNEQRKNTVDL…	1412	158.9	8.1	0	303.395	410.54	35	34	146	34	0	2.25092e+08	1.20182e+08
Res_015766-T2	MVSNSQSISLQYSEILGSNRTNDDTIFMVDDIEVHIQGYIETKIIMIPPFFRCEIVNNHFDTNIFIPTQAHHRLLAYLLYLGLLTYAARTFVGPRGGSEDMRIVRSFAELRGVEGRVQGGVGDQLLLVKTLQSLIEKSGRFDTQELVKRTDMPCLPLSTFFDIVSTNMIIPINASVSSIVSSCNLRKQHMEKEAMLVSKINQRISVTFLIPMQAGINQINYLFLSRGKIVKTGVIQKQIGTETTLNVDITADMAPKCRILAFFVRNGEMASDSVLMDVENGYKNEVLLNTDPAPDQTFRPGQDLAVKMKTSTKSVVGLLAVDQSIYYLRNESRVTNEKVFSDIGSFDLGCGLGSGRNNKDVFDRAGLSMLTDAAVPVSKREDLLCGEDPKRRRRRSVAG…	1404	156.8	8.6	0	298.64	466.13	27	30	145	3	0	4.64232e+06	2.16776e+06
Res_009983-T1	MALRLSGFGRFPSRISKVKCLRLLSSQQLPPNEPFTNFEDPIVRERLNEALARVNGQVEDIPIVIGGQEFRTNDVKYQVSALIEKAIENSLSNRERWEKMPFSQRGPIFMRAAELMATKYRYDMLATTMVGQAKTPIQADIDAVAESIDFLKFNHHYARDIYEGPALHQPKTVMNHVEYRGLEGFIAAISPFNFTAIGVNLAGSPAMGGNVVLWKPSDTAMLSGWLVYKILRESGLPDGIIQFVPCDGPLFGDVITNSPDLAGISFTGSSKTFKNIWKSVGNGIENYKTFPRLVGECGGKNLHFIHESADVDTVVNGTILSSFEFGGQKCSACSRLYVPDTLWPQIKEKLVNIMGQLKLGNPEEYSTYLSAVIDERSFDKISSYIDYARNSPQEEIVAG…	545	60.5	6.67	0	296.97	542.26	56	28	175	28	0	1.40628e+08	7.67749e+07
Res_014516-T1	MAEQLGLINGMELQHTDDATKTLFFDDGIRRIDYVLAYDDEEDEEELQKNSEMRKVFLENLVHQGLQVEEALSTKDSPRDDYGSTSPTPSGEKTDETATQIIESSTKKKEKLTHFIKIHAPFDELLDIAEDMKMKMPIQENDVVITSWVQKNLPWLDRAIKKNDPFVVRDSYVKEEPNFFVATFDKFRLKDFIGSSNQDEFFSPAERSRLVYYICEKTRYGDGRLQIGIDHMVHEGIFLAQYTLHDGRVHEEEGQQPENDRQRLHHDWASFKRIFKYQPIPAIKEYFGEKVALYFAWLGFYTTMLLPASIVGFICFLYGIGSSFNYVPVKEICKPSNESLFYMCPLCDKLCSYYLLSTTTCLYAKVTHWFDNQATLFFALFMSFWAVFFLEFWKRRQVS…	897	104.1	6.06	0	295.748	394.44	19	19	96	19	0	7.80417e+07	3.08795e+07
Res_004423-T1	MRVAEKLLNGILHSASSKRFKVTEIFTRIHHARLLVHSKVRILHSFTMSQGEEEKKKPFKRLPTSVVPSNYEIKLQPNLQDFKFKGSQIVDLEVKNQIKQITLNSVDIDISEAYLNAEGSDLKSSKISYDTVAETATISFPSPIPNGNAKLILNFTGELNDKMKGFYRSKYKDLNGEEKYCAVTQFEATDARRAFPCWDEPAIKATFDIKLVVPKTGVALSNMNIIDESDFSEDENLRVLTFARTPVMSTYLVAFVVGEFDYVEGHTEDGIQVRVYTPLGKAEQGRFGLEVAIKTLPFYKDYFGIGYPLPKMDLIAIPDFAAGAMENWGLITYRETALLVDPEQSSAAMKQWVALVVGHETAHQWFGNLITDYSLSDDCSSTKLGVTMEWWTHLWLNEG…	936	105.8	5.64	0	295.325	290.39	54	34	100	34	0	4.73726e+07	2.36034e+07
Res_002041-T1	MFRIQSQKLREVNLKKFALKSDHVLRLASRLALPCQNRHAYQSTTAASVKTPVKTKINKILVANRGEIAVRVFRAATEAGIRTVAVYSEQDAKQLHRQKADEAYMIGKGMPPVAAYLNAPEIIRVAKEHDVDAIHPGYGFLSERHDFARACVKAGIKFIGPRPEIIHLMGDKIEARKAAVKNGVPVIPGTDKPVKTMEEVREFCEEFGMPIMLKAAYGGGGRGMRVVSDIDELEKMFELATSEARAAFGDGSMFVERFISRPRHIEVQVLGDAYGDVVHFYERDCSVQRRHQKVVESAPAPHLSAELRSTLTGHAVRLCKAVGYENAGTVEFLLDEEGNHFFIEVNARLQVEHTVTEEVTGVDLVKAQIGVAEGKSLAEMGLSQENIHLNGHAIQARIT…	1219	134.1	7.23	0	295.082	296.07	31	29	93	29	0	5.30547e+07	2.86974e+07
Res_015495-T1	MEDFEVTISVSDRDIKMLETVEDIQNRREEVLKRYSEFKAATIARRKRLEDAKRYYQFKRDADEVEAWINERLQIATEESYKDPTNLQVKLQKHAAFEAEIQANKYMLDGIDAIGNKMVEDGHGQSEYVVARLEELHRLWNLLLQKSGEKQRMLIFTQRRVNFVLEVNEIISWIVEKENLCNMQEHIRDLEHVEVLQKKFDDFQKEIAANESRITEVNETVVQLEQDNHPEIDVILEKQKELINAWESLLASSQKRKTDLSTAYEIHHFYREADETMGWITEKQAKLATDDIGKDLVGVTTLQRKHEVLERDLAALSNMVHNLSDDADQLKEKHPEFEEPIEAKQTELDEHWVKLNSRAGERKSRLNDSYLYQKFIAEYRDYVTFISEMRVLVTSDELA…	2417	280.3	5.02	0	293.724	263.66	26	46	97	46	0	2.84751e+07	1.74848e+07
Res_004519-T1	MFRKGFSTLLKQKLVNNVPKRCAYLKLGKYNSWRQSQDGRRVKFALVMLGTVAGAGGLLGVYVNYASNQAKDDRKKKIVVLGSGWGAVSFLKHLKPDSYEVSVVSPSNYFLFTPFLPSVTVGTVEGRSIVEPIRKIIRKYQKQSAEFYEAECIGVDANEKRVYCQDTSGIIGKQSDFSLDYDILVVAVGAETATYGTPGVKEYTHFLKDIKDVQRIRSNIMDHLETAAYPGQEDSEVSRLLHFVVVGGGPTGVEFAAELRDFVGSELSILYPKIKDKIKLTLIGGYRGVLSTYDQEIGNYVEDKFKDDNIEIVQGARVLEINSSDIKLRDGKTKETVDLPYGMCVWAAGISPRQLTKDIIKSIPGQRNKNALLTDDYLQVKNAPGVFAIGDCGTIEMKK…	595	66.2	8.09	0	288.42	325.66	67	34	118	34	0	1.33837e+08	9.23762e+07
Res_010623-T1	MNAMLFSLVTFALLASPSLCQNPKWCVTSQEGKNKCETLAGQLNKKFSCVVGQDEKDCYKKIASKEADFGVFDGGMIYHAGKDHDLKAIMAEKLSGVASAATAYYAVAVVKAGSGLDINNLKGKKSCHTGVQKTSGWLIPVGALLSKKIMSWVSCNQYASVSNYFSQSCAPGANDKKYNPDLTGKDKLCALCSGSGADKCSRSSKEPYYSYDGAFKCLKDGGGDVAFIKASIVTSLSTSEQAKYKLLCLDGTVKDPKDFASCNLARVSSHAVLARVDAPIASYQSLLKEIDTKLQEKTGSSLKYDGTLFSKNTIGLEVVATANQSYDKYLDQKYINDISALDHCAKWCVTSKDALDQCNKIKTGTPGNPIYCLQGSSEKDCYTKIAAKQADIGMFDGGS…	678	73	8.38	0	287.564	461.07	36	26	158	26	0	1.35508e+08	7.9711e+07
Res_012771-T1	MFTQYLVTVLASATIFCKADYFPSDDVVELTASNFNSKVIQSDDVWLIEFYAPWCGHCQRLEPEWKKAATALKGIVKVGAVNMDVHASVGGPYNVRGFPTIKMFGANKNSPQDYNGARSASNIANEAINLLRQTVEARLSGKGGSRQQSHSGGSGSGDPKDVIELNDNNFEKEVFSSKDLWLVEFFAPWCGHCKALAPEWAKAATELKGKVKLAAVDATVSTIIANKYGIRGYPTIKVFPAGAKDHNSAEDYDGGRTASDIIAWATEKAAASVPPPDVLELTSNDVLKAECQDKQLCVLSFLPHILDSMAEGRNKYIKLLKDIGEKYRKKMWGWGWAEAGAHPKLETALGIGGFGYPAMAVVNSRKKMFVLLTGPFEEGGINELLRAVAVGRGRTEPIK…	443	48.4	5.49	0	287.415	390.41	70	27	122	27	0	1.63325e+08	7.92682e+07
Res_002640-T1	MKFVTIAAIAVLICFGQAVDARQSKKYMAKAKISTPKMIENPLKIHLADSKDLTEEDDTHSGSKREGRGRRGSTTNVNVKSCNANFCDPGWEPYPNIVSAMTGYNILKGNAYNFGTEQDPGFDNGYIFVPVVKDNDDRYTLHDGVTVRAISKCDLTLTTMSISTVKAFQKMNRKIEGMHEGWKTNPPVEVSFEGKGVRASAELPPLFEAYGTANLDQRKNEEFFVRRQGVLTVSAATCALYSMRISRRFPPPFKSTFQNAVKALSEATESDRKKEFHRFIQDFGTHFLQQATIGARLSILRRYSRATFQNAAAETIENCSKGRLSYFYFKEEGKNNCSKLDNAGKSTIFNDIEREYIGSYGSKPEKSLNEWASQEFDYPVPIRMNLVPIIELFHDDFMK…	646	72.3	7.23	0	286.654	457.21	39	26	150	6	0	4.76477e+07	2.02284e+07
Res_007239-T1	MFGSIKVSRHSLVLLMFLVLLRNHCFECKHLHEDDSNDENKDVESTLDEIDATEKVGYDVVEEEDGSKSKDPEENPDSWLPPKTAIAEEIDEINKIEGAKGLTDGDILPPTTVNAAADRNENEKRNAVRNRGQIWRTRVIPYHIDRSITSYVRRKITQAIKEFEKKTCLRFKRVSTSTREHYIKFFRGRGCYSSVGKTRRRFQLVSIGYRCGRYGTIIHEIMHALGFYHEHSRYDRDKYIKIQFSNILPGTDLNFKKNRIQDMTTLGLPYDYDGVMHYGAFAFTKNFRSPTIIKLGKGGHIGQRRGFSKTDLLQINALYDCKTSSAYNDLSSWSNWSPCIDYGLGRREYSQRFCFRENRRRCPGAGRYGTQRRSRSCTSDDVITLSREEAEEAEEASAD…	829	95	7.47	0	285.162	623.8	46	28	225	28	0	3.22893e+08	2.28068e+08
Res_013543-T1	MTTKTTKITITKSTVKVVNARDEKEFPRATKKDGRYITPWETSKAQPGGWDNFKYAFVPNNSRVPAEEKLNEEPLMQIMNADPNRIENPPENGIRVTWLGHASVLYQLDNVNILTNPNFSTRGIRYYHPGGDFRYRKPVYDVQQLPRIDAVLISNTHFDHLDLPSIRSLNERFGEMLLWYVPAGLQPWMSKAGCANVVELEWWREDEVDFIDQSKVDDEEETKVTKVKFVFCPSQNFHSRSTDDDNAVLWGSWAVLTPRYKLFFVGTSGYCDVFKSIGRKYGPFHMAALPIGGYEPDYKFGFGACTPEEAVKIHQDLLAMCSLAITWGTFNFANEYYLEPPQRLQEELRKNGLSDMQFFLLKHGESRLIEIKEADDKQDEDEQAEEHHHHHEHHADEDQ…	427	49.3	5.12	0	283.929	597.82	63	26	168	26	0	3.02161e+08	1.52284e+08
Res_010325-T1	MMNSLIFFAAVAFCLLTARQGEGKEDIKGLKLVVVTVATKETDGYKRFMRSCNLYGINVKVFGMNEQWRGGDIANGPGGGHKINILKNALKEYKDDNSTIVMFTDSYDVVFTAGADVILKKFLKFDANIVFSAEDFCWPDKSLASSYPAVPEGYKYLCSGGIIGYANNFNQLINFEKVGNTDDDQLYYTRIYLKHRDEFKIKLDHKGDIIQNLNGNSDVELTFDSKDVKLTNTRFQTVPAVVHGNGPSKSILNHFGNYLAKSWTFDAGCMKCNENTFNLKDLKEQEYPKVLMSMFIERPTPFLPAYLERLAQLDYPKKKIDLFIHNIDTYHNDDVTAWLKTHNDEYSSVKYLGPHSFLKEYEARNKAMFHCKSVKCDYVFVVDADVTLTNKDTLRVLIE…	730	84	6.67	0	283.418	443.5	46	31	164	31	0	1.35735e+08	8.24843e+07
Res_007669-T1	MMLGSAISSQVVRCAWNRFSPRAKPFVGVLRNSFSTLNKQTHQGKEARLRLLSRPCQNTQGNRGLKESAQKGGDNTVLFVGLGALGLATIVAVQSNIFTLDNKVKKPSESASASPVVTGNAEVNKGYTDDSHNQTEIAVVEKNQSEVEDAQANEVTAEEQPEAAVTVTSEEPSEAKQEESIAEVATKETVPSSDEIKVEDSSETKQEEVIAVDEAVKKNAYKDLPKVPEFVPYVIIGGGTASHAACRAIRKHDPKAKILVIGEEEVLPYMRPPLSKELWFSEDEDSADTLFFKQWNGKRRSVFFEDDTYYVKPQLLPVQDNGGVAVLTGHKVVDIDPLQHTVHLKRGEGIKYEKLLIATGGYPKSLDIFTNASDDLKSKVTLFRTVADYRKLEKQVGSL…	711	77.4	5.41	0	282.403	361.92	47	23	112	23	0	9.84982e+07	5.66244e+07
Res_016663-T1	MASQQDELATAILKQKAKPNRLMVEEAVNDDNSVVTMSQAKMDELQLFRGDTVLLKGKRRKETVCIALSDESCSSEKIRINRVVRQNLRVRLGDIVSVQACPDVKYGKRIYVLPIDDTVEGLTGSLFDVYLKPYFLEAYRPVCKGDIFLVRGGMRAVEFKVVETDPAPYCIVAPDTVIHCEGEPIKREDEEEALNEVGYDDVGGCRKQLAQIKEMVELPLRHPQLFKALGIKPPRGILLYGPPGTGKTLIARAVANETGAFFFLINGPEIMSKLAGESESNLRKAFEEAEKNSPAIIFIDEIDAIAPKREKTHGEVERRIVSQLLTLMDGLKQRSHVIVMAATNRPNSIDSALRRFGRFDREVDIGIPDATGRLEILQIHTKNMRLDDEVDLEQVAAET…	809	89.3	5.11	0	282.232	266.45	43	33	86	32	1	5.01177e+07	2.05164e+07
Res_002444-T1	MSYPPNYGGGNTIGFEGVTNNTGYPQNGPGYPSAAPSYGPGYPAGPGYSPAGSAPYPPGGAPGIPAHPYAPPPAANPYGPPGQGMSPYSVPPSAPNLSFQGAAYAASAFRQPVAQNYGQPFQPQPGYAPRTYDYQANQPPPPTQNYQPSPMPGPQHQPPAPQPSYPQTQSPQRQLQRHATLPSKLMSSQGTVVDHSPFYPQQDAEVLRKAMKGFGCDQKAISHVICSRSNKQRQQILLEYKTAHGRDLIKDLKSEISGHFQDVICGLMRAPAEYDAVWLRKSMKGLGTDEDTLIEILCTRTNSELRQINDTYTKMFSRNLEKDIHSETSGHFRRLLIAQVQGGRDESPTVDQRKAQQDAQELYRAGEGRLGTDESRFNVILSSRSFPQLRATFEEYKKI…	503	55.3	8.4	0	279.558	415.81	45	26	144	26	0	1.22642e+08	8.26436e+07
Res_002333-T1	MARAASLWLAAVFCFNIYICYSLVEGLPQGSIIRAKRELDENFEDALYEKEEGLLSKREANEQEDKSPEKGETKASVTEEKASESAKKSETGGNVAIDSEESIEAKSNEASEKDNGVEASAAKDEKPTKAEEQDAKAETRHNVEGKNADNLSKNLLKKGMDANVDNPLTNGDLIKKYDPSTDTNNGDMLGMSKRTDIVTKPNDVADSNTKPDTDAKRNELPKVSQTEETNSGLEKRQTISEPKLFKRSEKETHDIQEAGAPSHFQVDDKSADLEINANSAGVKVKAKPASLQVVSRPGQHGAPMMPFMPPPIPVMHHMPHHHRHHHHHHRRHHYEHPVFVAPFYPHHEEYMPYGHFGGHEGGFEEPRYFSSYHHGEEGYGYGHPRWGEGDGDGYHLYGR…	4611	498.5	7.06	0	272.903	561.25	8	17	166	17	0	1.95815e+08	1.10652e+08
Res_001896-T1	MLAKMHYILWLCFIISISCKIGSANPKVLSRKGKNVCEFATSKTAYQTITTKVTALETYKTCCSKFLVCWKSCERNRVKEKTISRIVSKLVRNRVLHCCEGYSVDASGVQCSRPLCDPACENGGTCIEPNKCKCPRNFQGRFCQNDVNECLAKEALGCSQGCINIPGSYICTCRRGFLPGDPLSRTCKDIDECKANPCKCIGSKCKNVCTNTIGSYRCRCGNGYKLTLWNTCVDVNECIENSNICPQGCVNTPGSYECTCWKGFRWNKRRKKCQEINECSIGNGGCHHICRNVFGGHVCLCRDGFKLGDDRRSCIDINECKWETRCDPRRSLCINTPGSYYCKCKAGFKFIESHGICLDRDECTERTALCSQKCFNAYGSYKCGCDTGYRLDNDLKTCV…	2286	258.4	8.88	0	272.572	293.55	17	39	128	39	0	9.73166e+07	5.13701e+07
Res_004594-T1	MVTRKTVIVLVVGTLSFVVSFVVGYLVRRATYTPKCSAPSVSSAGRSMAQRQKDWDTIVKKIDASKIDANMRYLSAKPHVAASPRNNELADEIARRFKSYSFDVEKQHYNVLLSYPRKDRPNYGYIITDTNTTNFKTQYIEDILDPAENSSDALQPFNAFGLAGNATGDLVYANYGREEDFAMLKDHFKVNCTGKIVIVRYGKVYRGAKVFNAQMNGAIGIFIYNDPKNYGPVPADKTYPKSMWMPRDGVQRGSIGLGDGDILTPGWPSTDDAYRMPMDTAPGLPKIPCHPISARDAEKFLSKMGGTPVGFTNWTGGLGITYKVGPGFNSSYAGWKAKLEVHNTRDILKITNVIGTIRGATEPDRYVMVGNHRDSWVFGGVDASSGGSVLLELARVFGE…	741	82.4	9.16	0	270.736	393.39	50	38	176	38	0	1.6177e+08	1.03482e+08
Res_003922-T1	MDLLRILVATLCLTICLAFEDDSLIPSDGFHDMLGLTPFWLLEPNANGMRRGLEGASKRNALPDSWSKVTSESTGKKVYTIAGFCNVEVNVDSEGAKLTVKEAGGCTVPSLNIVFPKLFPSVNIHTSTEKFILPESFNVEEIFINKQKFAKIKAKAKDTWSITEREILISNGELELGFHADKPVAAFKDWSLHAKGVIGISSHSMNVRIDKDLKKSTMKMKWSIASVAMADLMGLFGITMDFFKFNDIAFDSTKLEGITFAGASIDGILKPDETYQMVAKASVSHSRAFKSGDVYLVLTRNAGEVTKAALAIDIRDVHNIGEALENLIDQHDFISDFGLLGRIERDCIIMLSKEDIATAGESIDNLLSAFITPTATKMIPKGVNVRVKIPVKDNMKDNC…	1801	198.8	6.09	0	269.236	319.21	22	33	110	33	0	9.93051e+07	5.23936e+07
Res_006494-T1	MAKFVRSSKYRHVFGSAAKKTECYDSLRITKNPLENHFIAINAKFIALCIDAGGGGAFVVIPHDKYGRQEITAPKVCAHEQDVLDLAWNPFNEQIIASSSEDGTIKIWDIPEGGLITNLTAPLLTFDYHQRRCINIQWHPVASNVLMSVSQDPSIVIWNLEDGTAICEIDCHPDLIFNAEFSRNGDKIATTCKDKKIRIIDARTGAVLIEGNGHEGAKPQRVTFINFDRLFVTGFSRMSERQYGVWDQNDLSTPLNTTQLDNANGTLIPFHDSDTSMVYLCGRGDSVIKYFELVEEEPYVHYLSAYQSNTSARSLNWMPKHALNVNNCEVARFFKVHAKGMIEPISFTVPRKSELFQDDIYPDTPGIEAALTAEQWVNGQSAEPILVSMRTAFKEKEKP…	528	58.1	6.54	0	265.471	360.99	44	21	109	21	0	1.33918e+08	8.95981e+07
Res_006740-T1	MIRNLTNNLLYRKVGTTKACLLLGNKNLREAQNKTFYQLWKELQLRCYAAESAKKVFDRTKPHVNIGTIGHVDHGKTTLTAAITKTLANAGGAKYKQYADIDNAPEEKARGITINASHVEYETENRHYGHIDCPGHADYIKNMITGAAQMDGGILVVAATDGQMPQTREHLLLANQVGVKNLVVFINKADAVDDKEMLDLVELEMREILSQYGYDGDNTPVIIGSALCALEDRENEIGYNAILKLLEAIDSHIPTPTRDLDKPFLLPVEDTFSISGRGTVVSGRVERGRINKGDEVEITGHGTTLKTTVTGLEMFHKQLDNGQAGDNLGALVRGIKREDVKRGMVMCAPGSIKSYTKFDAQVYILKKEEGGRHKPFVSNYTPQLYVRTADVAAAIKLPE…	447	49.1	7.17	0	265.142	321.71	60	23	109	23	0	5.47498e+07	3.49646e+07
Res_005353-T1	MGVFKGQQWADGSPVKFVRWDSGQPDSNMGQQACTVMASNGFWRDNSCNTKHHYICKASVGKATIVPTTEPLTLPVTPTSNLNYCPAGWVWSSSTGNCYYFSNRTHFATWTMARSFCRAQGGDLTSIESSTEQSYLGPFLLTFTQRQAWIGLSDMGVESGWEWSDGKPANYFNWVPGQPDDAHQMEDCVHLKYGGQWNDANCGSEMSFICKRPNNTATRPPTVAPTAGPIKGYCEAGWLHYSSKCYKIFDEDKLSWKAARNACLAEKTNGRNADLVSIHSSYENAFLFSNMKGMYAKMFIGFNDIQTEGKFRWSDQSNPDYTKWYSRQPDNYWGAEDCTEIWPFSVHKGKWNDVPCTGEQGYICQKEMSSVPLPTSTPAKNSCPEGYLMYAGNCYSFKK…	1306	146.9	8.19	0	261.785	373.07	29	30	117	30	0	1.07917e+08	5.64273e+07
Res_000388-T1	MMCRPILMLSIGLALFASCLFGDKNEEAGKTEEEAVYKRPEVKGFAYIAEPFDNEIEFNEQWITSQAKKDGVDAAISKYDGKWSIEEPKDSAFKGDKALVLKEKAKHHAVSSLLPTKFEFTDQPFIVQYEVKFQNGLECGGAYMKLLSDLPKLDLEELTDKTQYTIMFGPDKCGEDSKLHFIFQHKNPKTGKYEEKHAKKPTGDFSKIFDDKKTHLFTLTIRPDNTFEIQVDKQVVNSGSLLTDFEPSVNPPTEIDDPSDKKPDEWDEREKIVDPNAKKPVDWDEDAPAKIVDPNAKKPDGWLDDAPENIPDPSAVKPADWDAEEDGEWEPPQIPNPKCSEIGCGEWKAPVIDNPQFKGKWQPPLIDNPDYKGKWTPKKIKNPDYFEDKDPFKMTSIAA…	587	66.3	4.69	0	260.495	272.42	50	25	87	25	0	5.77942e+07	3.83023e+07
Res_001797-T1	MATFTVKQGGTRKVYSAGGSKKTSGYHLGKPSDAIDGSRTPSDAAPYKGQKFQDIKNQCLRDGVLFEDPEFPAIESSLFFSGKKPPRPFVWTRPKEIVSNPEMFVGGASRFDISQGMLGDCWLLAAIATLTQYESLLYQVVPPDQSFTDGYAGIFRFRFWQYGRWEEVVIDDLLPTYNGKLVFVHSAERGEMWSALLEKAYAKLNGSYEALKGGQTSEAMEDFTGGVTETFDLRKAQPKLEGILLKSVARQSLMCCSIEAKPNEIEAKLENGLIKGHAYSITGVKKINLRGNPVTLVRIRNPWGNEREWKGAWSDGSREWGLLSEGEKRNLGITFDDDGEFWMAYNDFTSEFTRLEVCMLSPDSAGDVDRKTWEANVYQGSWQKGVSAGGCRNFPDSFH…	714	80.2	5.71	0	258.478	308.83	45	30	123	30	0	6.842e+07	3.72164e+07
Res_004921-T1	MRECISIHVGQAGVQCGNACWELYCLEHGIQPDGQMPSDKSIGGGDDSFNTFFSETGAGKHVPRAVFIDLEPTVVDEVRTGTYRQLFHPEQLISGKEDAANNYARGHYTVGKEMVDLVLDRVRKLSDQCTGLQGFLIFHSFGGGTGSGFTSLLMERLSVDYGKKSKLEFSIYPAPQVSTAVVEPYNSVLTTHTTLEHSDCAFMVDNEAIYDICRRNLDIDRPTYTNLNRLIGQIVSSITASLRFDGALNVDLTEFQTNLVPYPRIHFPLATYAPVISAEKAYHEQLTVAEITSACFEPCNQMVKCDPRHGKYMACCLLYRGDVVPKDVNSAIATIKTKRTIQFVDWCPTGFKVGINYQPPTVVPGGDLAKVQRAVCMLSNTTAIAEAWARLDHKFDLMY…	453	50.1	5.06	0	257.933	608.14	60	26	213	10	0	6.20039e+06	4.05119e+06
Res_017492-T1	MNRTLKMAEDTPATLRQSITPMAGEIRLNVGGTRFTTSYATLLNAPTDSPLRLLGQKVGYGIDYHTYFIDRSPDNFEYVLEFLKYNRISPPEGANDEFWQAIKQEANYYQIHKLQNYLKHRNEPETSEIKFLGTGEVELIFNDGGSIMTSVDVLGKADMDSLLHGVYRWIVRERSETMSAKYHIDRRSEGIQHIFDFFRYGNLPSNISENAELCEKMKEDAIFYGLRTMLKKIDDTVKK	239	27.6	6.32	0	257.047	654.27	75	19	209	16	0	5.59149e+08	3.73787e+08
Res_002922-T1	MEAVRQKLNTIRQEIDETEEKAKNFEMYIRMEQQRLESCLLERESLERKADNALKKIEDAQARYQEALDRLADVETSVDTNESKRKALEKRESDYDDKLVLLEERLRIAKINFEERRQLLDEAKRRKEVLNTELQKAEKRLHDAKDKSDFFDSEIDYAGQQLRQLERREMSSTDKEMELEDEVRYLADKLRGAQEKWFVSDDKVKALLRTKEALEDEIEEINSKTRKLKGEIQRMFDEIHSY	242	29	5.16	0	253.082	273.54	62	22	94	22	0	6.51817e+07	3.16551e+07
Res_003491-T1	MALNKLLRYISLSVFAFFVQNGAGNYVQEPKQIPEDVWKAYHRKSWEEKIREGAFGLPEHQDRIKHFPTGDNLDCNVRYLAYNYSKKLLSPSANLKAVLDGLELSKLCGITPNVPKRQVYREHEKKVLEIKLKEKYVEYFVDPKAAVSLNTVEMLGTKYSPFRDVNSALRACESGRSSINVHCIIRLREGTHFLESAVQLTPKHSNVVLTGYRSENAVISGGLEVSTTWELFDDRTELFSDANNMFEGIKPRQSTASVTFMGVFNTSATCKLLCDHQTTCTSFTYFGKDGGEFANMCYARLDGRWNPTAVKGAVSGRKVKIYVVDLAGRGLKPFRQMFVDGKREVRARFPNGNAENTGLHTVPTGYIKSAVKWLPPKAAEPAKEIHIDYPHRERTPFST…	929	104.2	6.8	0	252.517	322.12	32	29	112	29	0	1.21999e+08	6.32264e+07
Res_004195-T1	MNLIKGITNFAVCGLLLVLVRVEAQFGEAGRKELSSCPREQFECKKSARCISRSWVCDGENDCDDGSDEEPLLCASRSCATTQFRCLNQSKCIPTRWRCDRHADCADGSDEIGCDDVECGKSRFKCKSGSTACISLWWRCDGEEDCKDGSDEHNCRNHTCAHSYFTCGTGKCILNRWRCDGDSDCPDGSDEKGCLNTQASRQKCQEGEFKCHNGACIKKSFVCDGEVDCTDGSDEVVSCKPKCDLMLQFKCRNGKCVSKQWHCDGDNDCGDGSDEENCASVPACPVGHWKCIGSSKCIPVEKICNSENDCGDLSDEGIGCLVVNCRTSGCEYRCQPTPRGVPLCYCQPGFRLRKDGKTCQDVDECREFSAKCDQRCVNTPGSFKCSCARGYIFEPPHKC…	4557	509.8	6.48	0	251.804	189.02	12	42	86	42	0	4.35622e+07	1.98462e+07
Res_004484-T1	MSMGEVLLGNSGFDPRGNDMWMDANQSSARLFEKSKIKVLQDEREAVQKKTFTKWVNSHLQRLSTHVNDLYHDLQDGRKLIMLLEILSGEKLPKPSRGRMRIHFLENCNHALKFLKSQRVHLENIGTHDIVDGNPKITLGLIWTIILRFQIQDIMIETETSEKKSAKEALLLWCQSKTVGYKNVHITNFSKSWSDGLAFAALLHKHKPDKIDFNSLKKEEPIKNLNIAFECAEQEFNIAPLLDAPDVNVQYPDEKSIMTYVASFYHCFAKLKKVEVSGTRIQKVIKQSVENEKLIQEYELLSSTLLVWIKETITCLSSRDFGNTFSALQQQMADFNVYRTKEKPPKFIEKGNLEVKMFELTSALRTNRQKMYSAPEGHSVSDVNEAWAELEKAEHEREV…	2932	340.4	5.02	0	251.487	220.52	17	31	79	31	0	3.25539e+07	1.85245e+07
Res_004789-T1	MSEKPFAEVESFDTHKLKHVETQEKNPLPTSDVIKEEAADSRAEVKSFDHGKLKHVETEEKNPLPTPQTLKEEMRPEELPDVSGVSSFDTSKLKHVETQEKNVLPTADVIQEEATDSRAEVKSFDHGKLKHVETEEKNPLPTPQTLKEEMRPEELPDVSGVSSFDTSKLKHVETQEKNVLPTANVIKEEAVDSRAEVKSFDSSKLKHVDTVEKNPLPTPQTLKEEMRPETLPDVSVVKDFDASKLKHVETQEKVVLPTKEVIQEEAADSRAEVKSFDHGKLKHVETAEKNPLPTQADIKEELRPDVLPDVSGVKDFDSKKLKHVETKEKTVMPTADVIKEEATESRAEVKAFDHGKLKHVETQEKNPLPTPADLKEEMRPENLADVSEVKKFDSSKLKR…	688	77.5	5.53	0	250.615	217.92	49	25	70	9	12	3.40337e+07	1.94555e+07
Res_013463-T1	MNLGNIQKIARPYFQQFSCQNGWRALSSKPYLSKTKVESGKILALRREDINVWERRAPIAPQHIKSLKEQGINTLVQPSTRRAYTMQEYENAGAIITEDLSPASVIIGVKQVPIDLLIPDKSYAFFSHTIKAQEANMPLLDAMLAKNIRIIDYERMVEENGQRVAAFGKFAGVAGMINILHGIGLRLLALGHHTPFMYIGATHNYKNSRQAKLAIYELGEDIKAGKLPAHFGPLTFVFTGSGNVSQGAQEMFKELPHVYVGPHELKHAAQKYDHRTLVYTEVSRQDYLVPKLGGSFQASEFEAHPERYRSVFAEEIAPYANVIINGVYWAPKNPRLLTYEDALMLLEPKKELDKYSGCPDLPHTLLAICDISADLGGSIEFMNECTTIEYPFALHDIKK…	945	105.3	6.73	0	249.065	244.49	55	36	90	20	14	4.47712e+07	2.39221e+07
Res_016711-T1	MAGGAELTRKLSRYFSIYALLILIFFIQICLALYEDQVDLFDWRQQYVGKVKFAYFDQYSHNSRRAWVATHSNVIAALNARTGSIIWRKVFEEKNGKVDSLLHHANALISISECGKRIRSWDPNKGHLQWEAVSEIQKVSSHHNDIKGMPEWGAALVGRKGIHSTPGVAVLFGNVVRVHGLRDGSVLWSWKADISESDYSDSSCLAMLVDGDNLYVLIKKNQIILEIVTLDIDSGNVQSRVPVAAKWLSHSSIECIFVARTNLVCLDVMNSNLMVMDLGLSADGMSEIPLSSLNNDELTQQASLNSLGDNFQEEKFILALDNKTQNLIEIAKDSKSVSIVHSFPSKAYLKSSASSSSNILVSLVPEGVNLKVQIFDLSNFKELTKLSQDVKLDGYHGAP…	1002	111.9	7.17	0	247.31	219.26	36	32	86	32	0	5.25293e+07	2.6455e+07
Res_005218-T1	MLDKEDESGSIETKKERETYAGFDGQTVKNAVIHHAKIVAAALAIWTIGWLGLHYVWVLIGLMIFALWRLNKKEKEKRMKSLAEVSRNEQNALIQRRDLPSWVDFPDMQRAEWLNEIIAQMWPFVDKMVRQILKEKVEPKIQEKLPSIIKSFYFEKIHLGDQAPRFGGIKVYSKNIERSEIILDCDLIYAGDATVKVKVKGISAGITNIQVRAKVRFEMNPLVSQPPLIGGMSLYLLDIPDINFDLTDLLNLLDVPGLSDILHCCVRQAISSFVVLPNRIKIPIGENVDLESLKYPLPDGILRIEVVEAEDLVAKDTNVFSKDTSDPYVILTVGTQTLKTAAKEETLNPAWNETFEIFVESIHGRKLKLQLFDHDVGSSDESLGQTEIGVEKIAKLGSS…	708	80.3	6.16	0	242.812	253.02	45	27	95	27	0	8.02269e+07	3.73756e+07
Res_005438-T1	MTSLFRSEEMTLCQLFLQSESAYACVSELGELGLVEFRDLNPDVNAFQRKFVNEVRRCDEMERKLRFLQKEIERAEIPIADTGENPDAPHPREMIDLEAQFEDLENEMKDSNANYEALQRSFLELTELKHILRKTQTFFAEAEQHVQHQHIGDGAHNATEEMTLLGESELAATTAAGRLGFVAGVIARERVPAFERLLWRACRGNVFFKQAEIEEALEDPGTGDEVHKCVFIVFFQGDQLKMRVKKICEGFRATLYPCPESPAERREMAIGVMTRINDLQTVLTQTFDHRHRLLQTMAKNMNVWFIKVKKIKSIYHTMNMFNLDVTQKCLIAECWCPVDDLDKIQLAIKRGTERSGSSVPSILNRMHTKHEPPTFNRVNKFTSGFQAIVDAYGVANYQE…	850	97.2	6.33	0	241.002	519.39	31	21	136	21	0	2.38509e+08	1.31042e+08
Res_003997-T1	MASILQTFVFALAGFAIVECGKPSLTDPLGLLEETEFVGKGQNYVSGSVWPKPQRESRSDKYFAVDPAKFKFSVAGQQSSVLSLAMARYMPLTFPDTKVSTEWKMEQVETLQIKVSNEYAPMELSTDESYELDIQSPNSMLTATTVWGALRGLETFSQVVHQNESGSYFVQMNQIVDFPRFHHRGFLIDTSRHFIALPIILKFVDAMAYSKFNVLHWHIVDNQAFPYVSKTFPTLHSQGAWNNKTHIYTPDDVQTVIQYAANRGIRVMPEFDTPGHTRSWYSIPNLLTKCYSGSKPDGSLGPIDPTIDANYDFLKSFFTEISEVFPDYYMHLGGDEVSFYCWQTNPIIKKWMDEHGVQNYSALEQYYEQKLIDIINGLKKGYVIWQEVIDNGVKVKQDT…	540	61.9	6.15	0	239.545	382.56	47	24	150	24	0	1.40137e+08	7.98853e+07
Res_016714-T1	MKFPLLVLLAAGALSAPFNQYYDFVGVSESKCDNPRRLAEHATTLFDYEGETLNTIQGSTPDSTGIRMRARVYIHPQGACRFSMQINNAELLVKSKNTNGFSPAEESRKFARELEANDIIFETADGKIERLFPNSAESMHILNIKRGILSTLQLGKNNAEEVDVNGRCKVSVTEQDGMIIKSKNLSECSERAHSEVGFHTASFERKELPLKPLDSTSKCMIKTQDDRIVDVECSETHIFRPFSAGFETPSGAMTLVAQRMKFIGEKKGRVASSVEIEPKSKGVTLVYEHDAESMKPVNSIVERIDKVMARLVVSKDNMGAKQQSAHEFTQLVTLLRKVDDKRMTPLLEKYFNVHRQYLLDALTYCATPTCVSAVHKMIVNDVITGESMNMFLQGISMVA…	2655	302.1	9.51	0	238.051	232.74	12	27	80	26	0	5.94701e+07	3.02649e+07
Res_001248-T1	MADEGHVGEEKPKETVNRTVLQLLILCLLIESTISVDRNNFKTCQQSSFCRRNRGIQEGNSPYSILQDSVKFDSDSIKANLLNSKNNVSLALTIEPLEKNTARIRVRESNPIRPRYECKDSLDKEPAKVSYTKEKEDATGCSIKFDGNSIALTYKPFRLDFFQSGDLVLTMNSRGLMNFEHYRLRKNIEENAEHPSEQEINDGEPPEKKAKEDSSENSEGEQSEKKEENKEEEKSDDAKEEKKASEDEEGMWEESFNSHEDTKPRGPSAVALDISFTGFDHVYGIPEHADSLALKQTTGGDPYRLYSLDVYKYELYNPMALYGSIPFMIGHSKRRTAGVFWNNAAETWVDIKSSKSMLSSLMSFFKSEEAVPEMDTHWISESGIIDVFVLLGPKPHDVF…	966	110.7	5.66	0	236.95	265.33	41	31	93	31	0	5.1034e+07	2.94457e+07
Res_005328-T1	MFSRTRYALRKLCKIPGVCVSNPISLLKQCSQRCVWTGNETLQEDDPEMYELIKLEKRRQVEGLELIASENFCSRAALETLGTCLNNKYSEGYPGARYYGGNEYIDQIELLVQKRALDAYRLDPAQWGVNVQVFSGAPANFAIYTALLNPHDRIMGLDLPHGGHLSHGYMTDTKRVSATSKYFESMPYRLDEETGIIDYDKCEELATLFRPKILIAGTSAYSRLIDYQRMKEIATKVNAYLLADMAHISGLVAAGVIPSPFDYADVVSTTTHKSLRAVRHSLIFFRRGLRSVNKKGKEIMYDLENKINSAVFPGLQGGPHNHSMAAVGVGLKQTMSPDFVEYQRQVLKNAKVMANTLVERGYKIVSGDTEVHLVLVDLRPKNIDGARVERVLEEALITL…	497	55.7	8.47	0	233.448	258.86	59	24	104	23	1	6.47658e+07	4.20187e+07
Res_007643-T1	MGNANSAASATQPSPKPPSGGQSVTNMPPAPPMTAPSPPVESKADTPVEEVRKNPGSYEDIHKKCRDLMPTPYEGFKLVVNKGLSNHFQISHTLNLSATMPSSYHFGATYVGTKQISPAEAYPVILGDIDNSGSLSAQIIHQFLPNLKSKLVVQTQKSQFSMIQADSEYRGKDFTSTLTLGNIDVINESGIVIAHYLQKLMPRLDIGAELLYHYGAGQEAAALSLSGRYTADNWVAGGTLGQSGWHTSYYHKGNENVQVGVEYEYNSRAQEGCVSLGYQVDLPKANFTFRGLVDTNWTVAGFFEKKLPPLPFTFVLSGMINHQKNTSRFGFGLLIG	336	36.5	7.31	0	233.016	419.7	73	16	109	16	0	1.4506e+08	8.33766e+07
Res_015023-T1	MLKLTSICGLVVFGLLSTVQCLLDSSLLDALDSTVLALEDERSTKDFTAKVLPVFPIPLVPKARPGEPKIIPFSKTFGKKVFRKISSARRRSYKKRPSARKTNMKTRVSLNRNLQAMNQIQNSMLEAAAMRQKLNTASIQQLIKKACNAGQYIFARQMLGHNLYNLLDGGEGKRSRRSVVSAKQILNNVQSSIGSDQYKKLLAYDGGVTLGFAFDTTGSMGDEMDRAKTLARGIVNFKRLAAVDYVLSPFNDPVTNVYHGPVEFRLYEEKEDFVRLIDDLKASGGGDCKEMTINGIHSLFNAPIAQSSPVYVFTDAGAKDATDENVEALKDLVGMYKARLNFFLSYSGCLRSEDIQLYESLAESTGGQILYFSSSSKIALMDRLIQNTLIGGSSIPVIQ…	707	77.8	9.91	0	230.548	364.33	47	27	118	27	0	8.46054e+07	5.63207e+07
Res_011769-T1	MLSSQARSIASRLIGHVKPLCGLSSQVTQRFLATQATGRKLVNYDIQDNVAVIRFDTPNSKVNVLSEALTREFVDVFQEVSGNKDVGSIVLISSKPGCFIAGADISMLNAADTIEKATEISKNGQQVFQAVEDSKKPVIAAISGSCLGGGCELALACHYRIALDSPKTNLGQPEVLLGLLPGAGGTQRLPKLVGLPDSLDMMLTGKNIKASKAKRMGLVDQLVKQIGVGVGSSEQNSLDYLEKAAVSTAKGLASGAIKVDRTKSWMDMKGLTHNLTSNVTMVRDFVFKKAKETVMKKTGGLYPAPLKIIDVTKTGCEKGLKPGYEAEAAGFGELVASSEAKALMGIFFGQTECKKNHFGKPQKDAKNIAVLGAGLMGAGIAEVSLQKGGHHVILKDNAL…	769	82.7	8.9	0	227.596	259.88	50	27	94	27	0	5.82822e+07	3.10246e+07
Res_003503-T1	MATTTAVTDFKVEATKVKWDPKSVEIRTRSVEKTLEPLVHQVTSLVNHQRKSKTGKSKKATQLAKEIDEATERLVIVGESIAKDFPEIKEPMLEACKEARSAGDTMRAASNDFAADPCSSGKRSVMIRAARALLAAVTRLLCVADMADIYRLLATLKMVEKRLKELDGAENTDELLKSFKNYGDDLMKLAKLSGIRQADLKDPRKKDEMAAARATLKKSSRMLLTTSKAFVRHPEVASAKHNRDFVMKQISDAVKAISGVAQAVGESTPSPFEQAGALAKALTDLLAMINRKPADFKEKTTRVELEKQLDELLAAAARLADSSCTRDNTRDRLIAECNNVKQALQNLMDEYMKHAKGKPNDVPGAKNQLEKKARVLGKQLRKAIIDHVSDSFLETNVPL…	1253	137.8	6.19	0	224.697	204.35	33	26	65	26	0	3.14081e+07	1.65748e+07
Res_013748-T1	MAEYHCPDQKRLQTLKDIANRLRIDSIQSTNAAKSGHPTSCCSIAEIMSVLFFQTMRYKVSEPKDVSSDRFVLSKGHAAPILYAAWAEAGLFPRSDLMNLRKIDCDLEGHPTPRLNFIDVATGSLGQGLSCACGMAYTGKYFDKASYRTYCIIGDGESAEGSVWEAANFASFYHLDNLVAIVDVNRLGQSDPALLQHDMETYKKRWEAFGWNAHVVDGHDVESLCRHFYEAEQVKEKPTVLICKTFKGKGIPGIEDEMNWHGKALGDKAEASIKAIESVMADSQGPYKVDRPAVVEDAKHYSAETILLSEPPSYKLGEKVATRNAYGNALAKLGNSSKRVIALDGDTKNSTFAITFQKAHPDRFIECYIAEQNLIGVGIGCGTRGRTVPFVSGFACFLS…	623	67.6	6.61	0	224.324	239.2	51	20	78	20	0	5.17692e+07	3.35466e+07
Res_003989-T1	MMEASFLILQVLTIFCGSANSYTPENSLNVPQLLLPNAATNTIPTNYTLRAMKGCLHWSSSKPDIAKVIQLPDKDSCPTDRIFSQSNVETDRNGCSRSALVIVTSTSKEKETAIITAEDESTGIMLRCDVFVDTIHRIEIATTTRELLLGEAPEVFDVYGYDEEGNLFSSLGSTVFEWHLSPSTVSEVVDPATVLRFLQFQDTSYDTEPEIQILEEKGLQGSSVIMEGINTGEAFVSAKLAHAEYKHVSPSTVKLMVIDNIVLQPSKDMYILIGTKVFYKVKQLRRGHAKEIQMPSSQYRLQLDKDEIAELNHADSSITGLRLGSVKVLLIDNNVAHTKSLRQPSATIHVVEPESLGFAIAPGNSWVLQTGKEYVINVEVFDAQKHKILITDNTVMTSM…	1928	211.2	6.93	0	224.244	204.19	20	28	82	28	0	4.4835e+07	2.26118e+07
Res_009235-T1	MSNKRGLLERLDAGEVVIGDGGFVFALEKRGYVKAGPWTPEACVEHPEAVKQLHREFLRAGSDVMQAFTFYASDDKLSNRGNKAGSYGCAEINKAACRIAREVASEGGALVLGGVCQTPSYLSGLGKAVVQAEFKKQSDAFVELGVDFLLAEYFEHIEEMEWAIEVLKATGLPVASSMCIGPEGDLHGVSTATCGVRMAQAGSDVVGINCHFDPDVALAAVAEMKKGLDAAGIKKHLIVQPLGFKTPDVNTQGFIDLPEFPFALEPRICTRWDMHKYARDAYELGVRYIGGCCGFEPYHIRALSEELSKERGKLPEGTEKHAMWGGGLLMHTKPWVRQRAKKEYWQNIKPASGRPFCPSMSKPDAWGVTAGHKHLAQKKEETTENELKAESKELVGH	397	43.4	6.71	0	224.197	384.1	55	19	102	19	0	1.37492e+08	8.63606e+07
Res_003597-T1	MFTWQVAVTLAFLAASCFAEVKEDNSVPLSFVVQRQPEVPITIVAKNRTDVQAEKKAIIDFASSEFTDSGGGDDLLEEDQSELALEKEEADYDDEEIENQSVEDDNDVEDLSSGEKQESVDEELSFDDDESGDNAYDDYDPDEDSAADEDDASDSDANFSEADDEQIMSDISNINDYGSDDGESENYGDLESSDDNDADLTGEDDGEGEKEDESTQEDQDEGEDDNGTATEEFGNIEGDDTAPEEDNKGDVADDDGEEFSVDAENDAENDLTGQDEEGGDEQGSDENTDNENTGEVADGNESSGDENSNTDNESTGEVADGNENSGDENGNTDDNNTGEIAGGNESGGDENSNTDNDNTGEIAGGNESGGDENSNTDNDNTGEVAGGNESAGDQTPGNA…	5615	609.5	9.2	0	221.962	217.41	11	48	118	46	2	4.42978e+07	3.2968e+07
Res_013663-T1	MFFRFLLVLCLAASINGLCQKAKISADTYSTKSATISSQTVYIAELSISCDSEFQEQNFFAEVNGLLVPVAKSEDSGKYQVSWSTEHKAAQKGDIPIKIYDEEGYSAYRKAQRSGEKVPSVQPLATVTINHTGARREGFIVQTEFLSACVTMLIFWLANTARGKIME	167	18.5	7.21	0	220.752	453.01	43	12	118	12	0	2.28683e+08	1.4335e+08
Res_012375-T1	MQEELVMEAPVVRMEPMGFSVAHLDPPSQMLYNSLNFKHMSAEKLSESFHSAGQHLLQNVKGRFFSNKGNMTYTELLQGLIHRDEVILTRDPHLQFTTLVISNREGSEITTKIGGRALITDKRMLFLSSQFAETCSLAQFGDPKKLPGGYTLEMSCKDATYYFPISLENFKSVELDGRSGISGTISIHASKPPCAGCCGMFGGSCLKSWLPLPLVYSEYNELSVKLGVLLPPWNEPSYITLHLGANAPVPYIRDIISILQQNAPALK	267	29.6	6.93	0	220.076	362.52	67	16	100	16	0	1.79283e+08	1.07128e+08
Res_008646-T1	MPKAINVRVTTMDAELEFAIQQNTTGKQLFDQVVKTIGLREIWFFGLQYTDLKGYVTWLKLNKKVTQQDVKKDTTLQFKFRAKFFPEDVSEELIQDITQKLFFLQVKDGILTGDVYCPPETSVLLSSYAMQAKYGDFDKKAHQPGFLANDRLLPQRVVDQHQLTKVQWEERIMLWWGEHTDMTREDAMLEYLKIGQDLEMYGVNYFEIKNKKGTQLWLGVDALGLNIYEQNDKLTPKIGFPWSEIRNISFNDKKFVIKPIDKKAPDFVFTVQRLRINKRILALCMGNHELYMRRRKPDTIEVQQMKAQAKEERLNKQAERQRLKQEQEARAKAELQRLDLEAKLKKYEEDALKAQEALKKSEAAVSELEEKRKLAEEEAVTIIKAKQEAEEKRREVEEL…	644	73.9	5.44	0	220.057	264.54	42	29	97	29	0	6.64015e+07	3.84295e+07
Res_009246-T1	MAASNQKVVLVTGCSSGIGLETAVMLARDADKRFKVYASMRNLAKKDPLEKEGSDVLGKTLFIEKLDVSSAEQVEKVLDDLLAKEGRIDVIVNNAAFGWFGPTQCHKSEEIQSMFATNVFGPINIIKKMLPHWKERGSGQAITVTSTGGVIGFPYSAVYVSTKFAMEGFIESLALELLPFPNIRMTLVEPGPVLTKFFSNAQGENLAKFEGIDEPTKEAMSEMNRNSAATFEKVGQKGEDIAKIIINSIVTDKPQLRYMTNDKFADLIKSKYTDLTGEKPLKAMSQWFKVAE	292	32.1	6.62	0	219.707	231.83	74	21	85	14	6	5.53282e+07	3.49894e+07
Res_003596-T1	MFLRSRGYLRIALALLALLVLGCVTNAEHEKGGHHKKAENEKKHQSKGAEHSKAGHLHKKAEIDFSNSEFADSDISDDVQDEDQAEQVVDKEQADYDDDEVENSEFNDNDDNEITDLSDGESSESDVEEMSFENESDESYDDYDDDEDSAADDDDDDSDANFTESDDEQVMSDISNINDYSDEDAEDDEDASSEELEDNSSASEDTGVDDAVEEAESEVDGSDSASEDDADVTDAEADEDANSEDGVLADEPSVEDAAAEDAGKEDTMAEDDTGAEDAGADMQAATRSKGVSSPAANAPANAAQVDDTLALTGKRRDEVSADAGDVQTTPQTMLEGGTADEQAEENKDAAASDNESSDAKETKQQDNSAPMEESTGDDTAKASTQQDSSATKADEASTP…	3095	334.2	7.49	0	218.26	224.36	14	39	103	37	0	6.33855e+07	4.03869e+07
Res_012591-T1	MSSYLATRRIKNLLNPTRLAIPSCSRGFHFKIEGKRSKDGTSSSEISRQYPVVDHTYDCVVVGAGGAGLRAAFGLANAGFKTACVTKLFPTRSHTVAAQGGINAALGNMEDDDWRWHMYDTVKGSDWLGDQDAIHYMTREAPKAVIELEHYGMPFSRTETGDIYQRAFGGQSLNFGKGGQAHRCCAVADRTGHSLLHTLYGQSLKYDCNYFIEYFAMDLLMEKGRCVGIIALCLEDGSLHRIKAKNTVIATGGYGRSYFSCTSAHTCTGDGTAMVTRAGLPNEDMEFVQFHPTGIYGAGCLITEGSRGEGGYLINSEGERFMERYAPNAKDLASRDVVSRSMTIEIREGRGCGPHKDHVYLQLSHLPAEVLRTRLPGISETAMIFAGVDVTRDPIPVLP…	659	72.4	6.64	0	218.197	292.15	31	20	93	20	0	82224776	5.64791e+07
Res_011427-T1	MSANPSKPPYKVADLSLAEMGRKSIAIAENEMPGLMMMRKRYGKEKPLKGARIAGCLHMTVQTAVLIETLTELGAEVQWSSCNIFSTQDFAAAAIAVTGVPVYAWKGETDEEYLWCIEQTLHFKDGHPLNMILDDGGDLTNLVHDKYPDLLAGIRGLSEETTTGVHNLYKRMKAGTLKVPAINVNDSVTKSKFDNLYGCRESLIDGIKRATDVMIAGKVCFVAGYGDVGKGCVQALRGFGARVIIAEIDPINALQAAMEGYEIATIDDVVDKAQIFVTATGCSGIIKGEHFMKMREDAIVCNIGHFDCELDVQWLNDNCKKEEVKPQVDRYTLPNGRHVILLAEGRLVNLGCAHGHPSFVMSSSFTNQVMAQLELWTKTDEYKIDVVMLPKKLDEQVAA…	435	48	6.05	0	216.833	381.51	51	20	121	20	0	9.48096e+07	6.52127e+07
Res_006248-T1	MAYLSCEQKKELKRVAEAIVAPGKGILAADESTGTMGKRLANIGLENTDENRRRYRELLFTADKSIAQYLGGVILFHDTLYQKSKDGVPFVQLIKERGIIPGIKVDKGLVNLPGTIDETTTQGLDGMAERVQQYVKDGAQFAKFRCVIKINVANNVPTDVAIQENAQVLSRYAVICQANGLVPIVEPEILIDGTHELNVAQRVTERVLACVYKSLIDHHVYLEGTLLKPNMVTQGQSCSTKYTPQQVAEATVTTLQRTTPAAVPGITFLSGGQSEVDATLHLDAINKHQGKKPWALTFSYGRALQASVLKAWGGKEENVAAAQKELLKRSYLNSLAALGKYEGEELSEGAQQSLFIKNHSY	361	39.5	8.03	0	215.922	221.11	81	24	74	24	0	3.81199e+07	1.89208e+07
Res_004714-T1	MLLRGCLAISSSARFALQGKVIFAARRLGPLEGHVRPPLAVWSRQDYHKHSELPPENTLRGKESRKYGVLIAGALAGVLASFSLLQDEQNCKEAEIHLEGKEKLYSKEQISNHKTKQTGIWVTYKNKVYDITDFVDGHPGGNSKIMLAAGGDLEPFWDMYAIHKKEEVLEILNEYEIGEVRPEDRVERKATKVGPFANEPRRHPALIANSQEPFNAETPPELAVDNLITPNELFFVRNHLPVPVIDETNFKLQLSGAGMKEINLSLDELKTKFKKHKVTATLQCAGNRRSQMNNAKAVRGLNWTSTAISNAEWEGVLLRDILQYAGVDITNMDSEIKHIQFEGLDIDPTKAPYGASIPAYKAFDPSSDVLVAYSMNGKPLPRDHGFPLRVVVPGVVGAR…	573	63.8	6.71	0	215.723	229.21	52	25	79	25	0	6.88374e+07	3.48503e+07
Res_011844-T1	MIEMRQAEATKMPKIWFVLLIAQASSVFGVPTRTEGNAPLTPPFWGVRYAVTGVLRLPYAQIEEPFAAWFDGVKNRSRIDFYGGMDAVIQRSDKGDFGQIFKLSPMTDEKVVNKKSCFQINGTKEGKVTPQASLPDTGNFQFTGMVSYKGQYVESWRLVNEMGSKVNTYTVYVTKTARSPVYYEMLGFDSLYGSHYDDYKITYDSYMTEYNDTVFDVPIKDIECGGFPGPGHEANIVVNPMQEFIHPTNDEHLHPMFSDFTTKYKKDYINQGIDEYHKRLHIFRHNLRFIHSTNRKGLTYKVKVNHLADQTPNELRKLRGKKKSDGKYNGGKEFKPVLKPHEILKPHEIPETMNWRLRGAVTPVKDQAVCGSCWSFGTTGTIEGALFLKTGKLVRLSQQ…	569	63.9	7.87	0	214.801	351.15	52	22	117	22	0	1.16249e+08	7.32653e+07
Res_017079-T1	MAHKTILLLLFCVLAINEIYGKPIRKEKEEKEHPKKEEEAEYLRYLGQVVEILEEDDEFKKKLHNASEDEIRSGAIADHIDLVSHKVRSKLDELKRMEIEFQKRLRRQERDHLNGINERNFWSPLFDENSDTFEQEDLKKLLHKHNIMMEEQDKKRREDFHKYELEKEHKRREEMKNLSEEDRKKKEAEHEDELKKLRKHEKMHEPGSKAELEEVWKEEDGLDPESFDPKTFFNLHDKDGNGYLDNFELETFFVDDVDKVYNESDPNTDPRERQEELERMREHVMKQMDKDNDGLVSKEEFIKSTNDPEFEKDDEWKPVVDDEEYSEDELKEYEKQLEEEAERNREGHHGENNEHESDEHHEKPEEVHVEEKKDEHHAKQEQAQQQHHEQPKQQQQQHD…	436	53	5.07	0	214.289	256.73	44	16	81	16	0	7.61971e+07	3.87496e+07
Res_005287-T1	MWVSSKNLLAFVLLIGVFVCVTSAQNIDLNVEEKVGKCPDVDEERECPPRGDGSLSGDCLFDRDCNGTSKCCRLACESKCVEPIAVKTVKPVVVVGDKGDPGDKGDPGPPGPKGPTGDAGDAGPRGIKGSAGRDGSPGKNGRPGPPGPPGGLEGDEEEGLVPGPLGSLTNSKGPGPGDLPLETGSIGEAKQPTLGPAGPTGNAGAKGPTGPSGEGGEPGKPGPMGEVGDVGPQGPQGPQGPSGKDGSDGAQGEPGASGPMGDRGATGQSGQPGRRGAPGYKGLKGDRGVQGAKGSAGEDGANGETGDPGAAGDKGPTGPTGPRGPTGASGPKGPLGSQGLPGPRGSPGVSGPPGLQGVTGRTGPSGVKGARGDAGPQGGRGEAGERGETGDKGIKGVLG…	2713	259.8	8.98	0	213.739	280.65	11	19	91	19	0	8.82675e+07	5.28388e+07
Res_005703-T1	MDYRTVASLLRLFIRFMFLGVAVSFNLDTNYTVIKQGPPGSLFGFAVAEHQVTNAVTNKVEQWILASAPKANSTLIPTSIQTGTVFKCSATNSTSICKEELPFDRRISSSSENKNNQWFGVSLKSGGKDKSVLACAHRYLSYGPGDNFHLLSGKCRSIEGNLESSEYSFSPCEDPINRAQVPAYTNYGQCLTGIGADIISDQSPMRFLFGAVGVENFEGRAFEHLAADDSNFFQSSKIKDMELSYFGYSMAHGNYLLKTRKDIAMGGPRSDSTGKVMILKRSGTNVSRIITLPLADDKVQFTSAFGFAVCTHKPGAKSSNSYDQLLVGAPFHQNEAAESGQVYVYSRASESSMKLVTKLSVAVPRANFGASIASPGDLNLDGYNDIVVGAPYENDFRGA…	1083	119.2	8.72	0	212.665	235.8	34	25	83	25	0	5.45041e+07	2.80366e+07
Res_015289-T1	MSGEKPKVVLAYSGGLDTSCILVWLIEKGFDVICYLADIGQDEDFEAAREKASKLGAKKIYIEDLKSEFVEEFIFPTVQANAIYEDRYLMGTAIARPCIARKQVEIAKKEGAEYLSHGATGKGNDQIRFELTYYALYPAAKVIAPWKMPEFFERFQGRLDLFDYAQKNNIPLPVTPKSPWSMDANLMHISYESGILEDPAAPAPDDIYQMTSDPAKAPEKPENIELEFKRGVPVKVKNLDDGTVFEKPLDIFSYLNKVGGRHGVGRIDIVENRFIGMKSRGIYETPGGEVLREAHLDIETFTMDRNLRKIKQQLSTDFSEQIYNGMWYSAECEFVRFCIDKSQEFVEGSVKLAIFKGKVYIKSRESKMSLYNQELVSMDVAGGYDPRDSGGFIKVTALR…	412	46.7	5.88	0	212.331	358.01	52	27	130	27	0	1.20474e+08	6.9556e+07
Res_017482-T1	MCSRYSCHFFLLTFIANSEWHTICFVVEPCINAAEIGFIVDSSGSLRRDYGKEKEFVKILADSVGIEEGGSRAGIITFSYDAELSVKLSDFRTTAQFNEIVDKLPFMGYTTRIDKALTLAKDKLFQQSTSAGRVLPKIIFLLTDGRQTRDQDAVDPATIASEIRMQFGAKTFVIGIGRRVDPPELNQIAGDSSNVFLAKGFKQLNSAPFVNKVADMFCRSAVPLADPGLNMCKSRVDIAFVVDSSKSMATHYDEAKLFVKEMARSFDLSADGTRAGIVVFGNSSRVSMKFSDTNRLEDFEETVDNLVLLGGDRRMDKALELAFDGIFKPEHGMRPEAAQVIVLLTDGVQSKDAGAQALLQAALPLHESKIKVLAVGVGGNVKKEELLRAVKSENDIYIA…	428	46.8	5.69	0	210.078	349.98	65	25	125	24	1	1.35177e+08	7.71119e+07
Res_003127-T1	MKQESKLWPSRLLKESLDALVHFRVKSITKNFVSINQELLENCQKIVGYVDMVFKMVLKGMDVSQICVQLDFCNQMESVLPFETRLTGLLKSFETGCLPMQEKQQELPQRRQEDPKSLCQKIVGYVDMVFKMVLKGMDVSQICVQLDFCNQMESVLPFETRLTGLLKSFGNRMSSYARKAAGTAAKKAGRSEKSCKICKQVVNYVSMGIKTFNQTEKEIIDSVNQFCTTFSRNQKQDGECQKIVGYVDMVFKMVLKGMDVSQICVQLDLCNQMESVLPFESRLTGLLKSFGNRMSSYARKAAGTATKKAVRSKKSCKICKQVVNYVSMGIKTFKQTEKEIIDSVNQFCTTFSRNQKQDGECQKIVGYVDMVFKMVLKGMDVSQICVQLDFCNEMESVLP…	1084	123.2	8.92	0	209.154	2355.35	34	28	1274	7	0	8.76963e+06	8.68742e+06
Res_000003-T1	MTLLRISNCFIRYKHSLVVTGSKLNKVASHKHQKQVNFLQNERLLSRLYSGTSQFLSSHVKEDVAASGTPYSELTVSVPREVHPDERRVALSPQACKALIDKGFKVLVEAGAGSLAKFTDQDYANVGATLVNTKDAYLGDIVLKVRAPEEHPHLGVHEASLLKDGGNLVSFIHPAQNKDLLDKLSEKKLTVLAMDCVPRISRAQTFDALSSMANIAGYKAVIEAANQFGRFFTGQITAAGKVPPAKILVIGGGVAGLAAVATAKNMGAVVRAFDTRAAVKEQIESLGAEFLEVKGVEESGEGTGGYAKEMSPEFIKAEMELFAKQAKDVDIIITTALIPGKPAPKLITTEMVESMKQGSVIIDLASEMGGNCEVTKPGEIYNYKGVQIIGYTDLPSRLP…	1091	114.3	6.8	0	208.779	221.05	33	30	84	30	0	5.72165e+07	3.67699e+07
Res_007969-T1	MKLALLLALAFTAVFAQKADEMNPFDKIMFINNNAGAKFSVDNENNHPDLFEGDIVMTKSLQTDIDNMEYAAKNKISKFDAITNGAWSNGVIPYTFDRNFNARGRSVVRQAIADYQKYTCIKWVPRTNQRSYVTFFHGSGCYSMIGQQGGPQRISMASPGCLSKGIAIHEMMHCAGFFHEQSRTDRDRYIKIQWGNIMSGVDYNFKKYRYGQASTLGEPYDKQSVMHYGNYAFSKNRGKTIVSLSNPSETLGQRRGFSRIDINQLNKYYKCRGTKPQPTKKPVSTCTDSYVFCKALKSYCSHSWVIANCKKSCNRCSRPKPRPKPKPNCEDQNRYCPGWARAKYCNHQRYKSFMQRSCKKSCNFC	365	41.8	9.52	0	208.187	291.7	45	17	87	17	0	9.05943e+07	4.64346e+07
Res_012851-T1	MAAVEVKKREYNVLAGETHRVEGRSGGIVTTQPSAQSGIESYVLDLDAQQVATWTPEDVINNFVEKVGLGYLNEAFLANKITGRALMLLNEGHLKEMGVHAIGDRVYLLDMIGLLKKKKKELESTATLWSGETPAPGMAYSKGLCHCLGKTLCPCCVARTYWKVTAQGVFYREVPVLRRHFGTVSTEYMDYRFFKDLELKESFFCCCFCKRHALEMYVEDKDAKASERDGGASGFPVPHILLHPDAAKVEQIVRNAWTQARLVAD	265	29.6	7.4	0	207.892	246.52	58	18	76	18	0	75711469	4.36952e+07
Res_003226-T1	MMLSRYAKAAFRLPKISRSLSALAGPSAKSKAVFDLEDKYGAHNYGPIPVALARGQGVFVWDVDGKRYYDFLSAYSAVNQGHCHPKIVGALKEQADVLTLTSRAFYNDQLGQYEKYVTDMFGYDKVLPMNTGVEGGETAVKLARKWAYLVKGVPDCQAKVVFAENNFWGRTLAACSSSSDPSCFQDYGPYMPGFQLVPYNDLAAVEEAIKDPNTAAFMVEPIQGEAGVFVPDDGYLQGVRDLCTKYNVLFIADEVQTGIARTGKLLCCDHENVRPDVVILGKALSGGVYPVSAILADDEVMLTIKPGEHGSTFGGNPIACKVAMAALDVVKEEKLAENAERLGNILRAELGKLPKDVVTDVRGKGLLNAIVIKDTPDYDAWKICLQFRDNGLLAKPTHG…	430	46.9	5.8	0	207.403	295.18	56	23	99	23	0	9.82319e+07	5.60792e+07
Res_007330-T1	MSNERSTESSEPVQDPRPGGNGGEVDGGIESNWDTIYESFDDMNVKENLLRGIYAYGFEKPSAIQQRAIVPCIKGHDVIAQAQSGTGKTATFSIAILEQLDCNLPDDTGRERKVATQALVLAPTRELAQQIQKNVLALGDYMAVKCHACIGGTSVRDDMLKLEKGVNVVVGTPGRVFDLIERKKLDVNEIKMFVLDEADEMLSRGFKDQIYEIFKRLPPMVQVILLSATMPTDVLEVTTKFMRDPIKILVKKEELTLEGIKQFYIDVNKEEWKLETLCDLYDTLSITQAVIFLNTRRKVDWLTEKMTSKDFTVSSMHGDMDQKERDLIMREFRTGSSRVLITTDLLSRGIDVQQVSLVINYDLPTNRESYIHRIGRSGRFGRKGVAINFTTADDARLLR…	420	47.4	5.24	0	205.167	308.06	51	25	123	23	2	8.7156e+07	4.74142e+07
Res_001544-T1	MLATALEHSTRPATRKDAVQVQTRYQYSLRELVPRSDVCGAVVKNPKKNNSKMAMSGISVSKEAIEIYKTKFQPEKTTMAILIFGVVDEKEVQVVKEIYPEEVDAKLAEAIAGGFKQKSHNGKPEPNNMAYIRYLFLKDQTPQYAVVKLKSLSDLTVLAYLAWIPIECTVRQRMVASTVKEEIYKKLDGTKINAACHDESDLDYIDILGRHK	212	23.9	8.84	0	203.781	354.78	63	15	129	15	0	1.35248e+08	9.90291e+07
Res_017493-T1	MAEDTPATLRQSITPMAGEIRLNVGGTRFTTSYATLMNAPTDSPLRLLGYAVGYGIDYHIYFIDRSPENFGYVLEFLRDNRISPPSGASDDFWQAIKQEANYYKILKLESYVNHRNEPETLEIKSLSTGEVKLMFNDGGSIMTSVDVMKRADEDSLLRDVYRWIVRERSETMHGEYYIDRRSGGIQHIIDFLRYGNLPSNINENAELCNMIEEDAIFYGLKTMLKKIDDAAKKQGNGPQALQPTCLRSGEVKLMLNDGVSITTSVDVLRKADINSLLHNVYLWIVREHYNTMSGEYYIDRRSGGIQHIIDFLRDGNLPSNISENAELCNMMKGDATFYELKTMRKKIEDTVNK	353	40.2	5.62	0	202.87	295.08	66	24	105	21	2	1.20285e+08	8.70276e+07
Res_001971-T1	MMSTSVLRKIRYKGIVCNDGNVLILFGIRRKSTFPTTRGRSHNSSFCLGPRLGSRYTSTGSQNNGENTDFDAAKKYDIVIAGGGLVGTALACLLGKDPVFQDHKILVLEAAPSMELLKHAPERYSNRVSAITPGTKGLLEYIGAWDEIKSLRYKSFSKMHVWDACGAGYITFNAEGIRQENEENTDHSMAYIIENSIILSAMTQQILNVHQNVDLHYSSRIKDIEFPADKCEKNVPQLVRLSLENGSEFQTKLLVGADGINSFVRAKAKMRFLAHDYQQTAVVATLHLEEETPNDVAWQRFLPTGPIAMLPLSRNRSSLVWSTTPADARALIDVPDDEFVDAVNNAFWADCDRHPLIDRSASVLQSIISAIQPGTFAGSKLMQPPTISGIDRSSRAMYP…	520	57.4	7.43	0	202.048	283.94	47	17	90	17	0	9.67577e+07	4.65203e+07
Res_002855-T1	MAEVETVQTVTETVEVTETKTVTTSADGTVTEVTVVKTVESGDSHGQEEAKPAEAVQVEVKENGGAEPAKDEEPPVVEKDGAEGVVVEEKTAEKVEVQEEKKEEGPPKVILHQFPPVASVPSLSPFCLKLETFLRMNKIPYENVHSLKVGKKGKMPWIEYKGERISDSSFIIDYLNKTFEIDMDKNLSKSEKAQSRALKVMLEEQSYFTLMYSRWVDEFNEFKKVVSTHQKGIGFAVTFKMNQRKARSTLDHQGIGRHSKEEIYKIAEQDLRALSDYLGEKPYMMGAEATTLDATAFGLLANIVYSGLESPQFKMVKEEFCNLADYVERLKSEFWVDWNEMVLGDKPEHTHIRRRFSFKTGKKKAKEVKKEENSSEEEKPEEGKADADKSEEPAPAEGE…	442	49.4	4.92	0	201.27	256.96	53	18	92	18	0	5.8564e+07	3.14261e+07
Res_006210-T1	MSKFNSNKQTDSKYFTTTKKGEIYELKGELNSDKKEKKKEAVKKVIASMTVGKDVSALFPDVVNCMQTDNLELKKLVYLYLMNYAKSQPDMAIMAVNTFVKDCEDSNPLIRALAVRTMGCIRVDKITEYLCEPLRKCLKDEDPYVRKTAAVCVAKLHDINATLVEDQGFLETLRDLLSDSNPMVVANAVAALAEIADSSPNAHQYFEINPQTINKLLAALNECTEWGQIFILDSLATYEPKDEKEAQSICERITPRLSHANAAVVLSAVKVLMKFMEMILQNSPYMNSLIKKLSPPLVTLLSAEPEIQYVALRNINLIVQKRPDILKHEIKAFFVKYNDPIYVKLEKLDIMIRLATQQNIGQVLAELKEYATEVDVDFVRKSVRAIGRCAIKVEQSAEK…	949	104.8	5.29	0	201.108	210.99	33	24	70	24	0	4.40345e+07	2.2413e+07
Res_009886-T1	MYAKTTEDLNGSNDDLIPPRMPDNAFGYAQLQLGADEVNTGNAPYSVVFNGSPGRTKKKNRQIIVTLLLILLGLLCVVFIALYVSKSKELDSLKGARPTDKKFCLTPGCIDAASFMQSAMDKTAKPCDNFYQYACGGWISKHPIPEKESRWGVGSVLMNENLYALRHALEEHDRTKTRPANKEDAELKAKQFYKACMQKEAINKLGKAPLIEVLKKFDEVGSKGRDKKTVLKEYLVMLNRNFSISALFNTFVEVDARNSSLHRIQISQSGLGLTQSRYAANMTDKVISAYINYMTKIHLLLGAGNVTKLGSQMEDVFNFEKSLAKIFVPRENMTEINKIYNKMTIGEFTKICNMIDWLSFYQEASLGLAKITSDTEIIVLAKPYLEKLSGLIEKTDFNV…	780	88	8.94	0	200.868	212.71	31	20	68	20	0	7.87817e+07	6.02696e+07
Res_010584-T1	MASGSKARVYAEVNTHRPREYWDYEAHVIEWGQQDNYQLVRKLGRGKYSEVFEGINVVNNEKTVIKILKPVKKKKIKREIKILENLRGGPNIITLLDVVKDPVSRTPALIFEYVNNTDFKQLYQTFTDFDIRFYLYELLKALDYCHSMGIMHRDVKPHNVMIDHDQRKLRLIDWGLAEFYHPNQEYNVRVASRYFKGPELLVDFQEYDYSLDLWSFGCMFASMIFRKEPFFHGHDNYDQLVRIAKVLGTDDLFDYLEKYHIELDPRFNDILGRHSKKRWERFIHSENQHLVSPEAIDLIDKLLKYDHAERLTAREAMDQPYFMPVVRQESARSGSASAASNNASISNGPSPTL	353	41.5	7.43	0	200.697	255.08	58	18	90	18	0	7.34729e+07	4.27279e+07
Res_013346-T1	MKLVTVGFLLSFVGYCLGDCYMHFPRGSNNRLNEKSANRRNANRVFDSQNNNRGGYNVGDKTDRAFTVESQQYHETFFTSSAQSRLPSGNGKSFLDIEWTNQHGCGGNEDTDPHKLNCNMVIQYLCQQDNSLPAGHRLKLRNGRTTATPNFRGGRANERMATTLNRMNGDLDPNRVLHEQWAWYDKCSRRDRNYGLFTADQNVRKGSARFTRQNRNGNRRGYECPEERDYYPYWHPTEWKDIAVLAENSSRCSFYQSESFNVRPRHECIEKDSTGQYMLSSKYNNQKECESKGGEWLDFYNFLERAPQHTTEAACQAASRNGVKYIWGRTLFFPQKKECLVALPPPDCKEAMWSRVNHLGNGRGGQPLSYRWTIPHFPSGDKQRCVLRIRYNISTDDYD…	659	74.9	8.88	0	199.649	215.37	31	19	73	18	1	4.58766e+07	1.91925e+07
Res_005706-T1	MLLSKALCLMVVLSVLTFFPVPVEGHDTESIGSPESNILRKDNRDDFIFTVNPTPPSGWGQGRNVADERQWLYNNLWSTYGVQSKPDSEGIAYIQVNLRKPYFVRAFAVTGYAGGSHKPTGSFFLEGSNDGTDWKMVAEGTSDQWHAPVPVEGHDTESIGSPESNILRKDNRDDFIFTVYPTPPSGWGQGRNVADERQCLSSKLWSTYGVQSKPDSEGVAYIQVNLRKPYLVRAFAVTGYVGGSHKPTGSFFLEGSNDGTDWKMVAEGTSDQWHAPGTFPFRQSQIIKAVYPNRYQHYRVIARGWTDNFILIYNWGLFA	319	35.7	6.44	0	199.134	441.91	52	11	115	11	0	3.54685e+08	1.6606e+08
Res_003525-T1	MIRGLLNSSRLASAVAKSSFSGSVAKHGCLCQNVSSYLYRTYASEAVRGNVIGIDLGTTNSCVAVMEGKTPKVIENAEGARTTPSVIAFSNDGERLVGAPAKRQAVTNSANTLYATKRYIGRRFDDKEVQADLKNMAFKIVKASNGDAWFEAQGKVYSPSQIGAFVLVKMKETAESYLGSSVKNAVITVPAYFNDSQRQATKDAGQISGLNVLRVINEPTAAALAFGMERSDDKIIAVYDLGGGTFDISVLEIQKGVFEVKSTNGDTYLGGEDFDNALLKHLVAEFKKDTGIDITKDNMALQRLREAAEKAKCELSSSLQTDINLPYLTMDASGPKHMNLKLSRAKFESLVANLVERTIQPCKKAVQDAGIKNSEIGDVLLVGGMTRMPKVQDTVKEIF…	672	72.9	5.68	0	198.983	210.97	49	23	71	23	0	6.55842e+07	2.78126e+07
Res_001121-T1	MSGRGKGGKGLGKGGAKRHRKILRDNIQGITKPAIRRLARRGGVKRISGLIYEETRGVLKVFLENVIRDAVTYTEHAKRKTVTAMDVVYALKRQGRTLYGFGAVLEYLSAEILELAGNAARDNKKSRIIPRHLQLAIRNDEELNKLLSGVTIAQGGVLPNIQAVLLPKKTEQKAPKS	177	19.5	10.7	0	198.729	514.5	57	21	185	19	2	3.16975e+08	1.82259e+08
Res_007803-T1	MASVISSLSKGIGRLPPISACFRNVLPLVSSRSITQVPKEEVLKQIEKPKYPGELGEYTGAVYYPDEVTSKWDDEELVIEKGVTNITLNFGPQHPAAHGVLRLVLELSGEVVERADPHIGLLHRGTEKLIEYKTYLQALPYFDRLDYVSMMTNEQCYSLAVEKLLNIQIPERAKWIRVLFGEITRILNHILAVTTHAVDVGAFTPLFWLFEEREKLMEFYERVSGARLHAAYVRPGGVSQDLPLGLMDDIYDWLLKFGQRIDEVEEMLTANRIWKQRLVDIGIVTAEEAMNYGFSGVMLRGSGIKWDLRKSQPYDAYDQVEFDVPVGKHGDCYDRYLCRVEEMRQSMNIIHQCLNKMPEGPIKVDDAKVSPPKRSEMKDSMEALIHHFKLYTEGYNVPP…	469	53.2	5.94	0	198.669	211.08	49	18	68	18	0	4.88351e+07	2.77892e+07
Res_015457-T1	MITIQLKTIATISFLQCLIHGVLCLVCPSTWPPYSGPPIPNIPDHFSSDMITTDIVNGATSYEMKIERMYVDAKRKLMATEQGGDFEIGGRKMIMDHNRKQAMIISKKKCNVTSISDIPLDGLRPYGNNEFSSGNQLFRFGKDYHLVYNGNFSYEDKVLDAWTECLPALGKGNDFNISVQYLFTKKDSKHGQQFFGFSAAALTKNQTIMVKFVNMNPGTPSPEHLQVPNDVFCNMTTTKVQLPRFPDEFEMNIEVLMLSNKTGFNARDYIDTKEKYFRSDHHHRENGVFVPVHEIHDFNTGIMYTIDVNTFDCKVKPLSNRSWDSVETEDHHHIRMKTTNEFMGIDGQRYIHEGFTTVRGIPVDVFSNMMPSRRHPGQMVLRKWYFSRPDWKIGGMEGP…	638	72	9.06	0	196.148	275.75	31	21	102	21	0	6.03952e+07	4.17434e+07
Res_012842-T1	MEYLKISFLTQSMILCVLHSFISTVIGQDIVGCGGFVQSTVPINFERVEVKLYTKTGALKFKTECAPNNGYFLVAVYDKGEYTLRIEPPNGWGFNPTEIDLNIDGKTDPCVKGQDINFKFTGFSVGGLIGSKNRAIGPAGVDIQLQGAGEDIRKNVTVENGLFSFANVMPGTYELKASHPVWTIQQDAKPVVVKDENVYYPGLIMVSGYDVKGHVRSAGEPIQGVIFVLFAEEKTQMSGCTELPEDVAQKLAKRVNLPQICSVLSGEDGVFVFPSVPSGDYTLVPYYSSQGIVFDVVPTKITFQVNLKSVMLKTPFQVHGFSVTGKIIDTEGKGIQGVTVNLGKDTKPVITNFDGVYLVENVTSGTYQIEASIQNLFFDKTEVHINPNSPHIADIQVKK…	1184	130.4	6.89	0	194.319	209.49	31	23	75	23	0	4.42135e+07	2.2788e+07
Res_006589-T1	MADREDKVFCAKLAEQAERYDEMVQAMEEVARSDTDLGIEERNLLSVAFKNVIGARRASWRIVSSLEQKEEEKKANKDEAKLEMMRSYRKEIEAELQKICKSILTLLDDHLIPNAEKMKSNDLPEFESQVFYRKMKGDYHRYQAEFASGDERKQAAEKSLVAYKSANQTANDKLNPTHPIRLGLALNFSVFYYEILVSPDRACRLAKTAFDEAIAELDTLSEDSYKDSTLIMQLLRDNLTLWTSDVEAEEGKGDTVIQDMEDQDA	265	30.4	4.89	0	190.556	166.76	77	18	56	9	6	2.79777e+07	1.76973e+07
Res_011563-T1	MPKSLKERRNSGGARKKSWIAWPNAKKSYLKRMLRDERDAVQKKVFRKWINSHIRKVGEEVHDIFYDLQDGRALVTLLELLSGEKLLKEKSGLRLHKMQNVQQCLRLLASRKVKFVNIRSDDIVDGNPKLTLGLIWIIILHFQVSTVKEIFKQEQLTPKEALIIWCKELADGYPGVRIENFTTAWKDGLAFNAVVHRHRPDLIDFTYVRNLKPDARMDYLFRVAERDLGVIGLLEPEDMLGAEVDEKAVLTYVSSLYRALPSVPPQTRMQSEEERQQAYFEYCTKAKKIITWIKNMISHVKSREFPTTLFAMKDIVAQHKFLKVEIMPNKDHERRSLKYLIRDLQAMYDPKIKFLDVAEGLHPRVADELWAELLIAVEERTKALNIELSRLEHLQKIAE…	2628	303.1	5.3	0	190.049	161.73	13	23	59	23	0	2.65928e+07	8.39663e+06
Res_016929-T1	MADFAAVFSHIDAHIDDYVKKLGDWVAIKSVSAWAETRQDVFRMIQHVAKELETLGAQVELAENPLGKQKMPDGSEIPLPPILLATLGNNPAKHTICVYGHLDVQPAKLDDGWDTEPFTLVEKDGKLFGRGSTDDKGPVLAWLNVLEAYKKLGREVPVNLKICFEGMEESGSEGLEELIMARKDTFFKDVDFICISDNYWLGKQKPCITYGLRGVCYFFAEITCAKQDLHSGVFGGCVHEAMTDLVNVFASLVDNQGRIKIAGINDSVKELTDEERAMYKTIQFDLEECRDDLGAKKLIHEGLDDGKEKTLMHRWRYPSLSLHGIEGAFDAPGAKTVIPKRVIGKFSIRIVPNQTPEEIEKLVKKHCESVHKDSGSPNQLKVTMGHGGKPWMSDPNHPH…	481	53.3	6.23	0	189.119	235.82	42	21	100	21	0	1.04348e+08	6.36178e+07
Res_003822-T1	MSIPEEELAELRESFNNFDLDGNGHITSQEIGNVMKSLGEDIPGYKLREIIKEVDSNQNGTVEFDEFLQIYKTVSSKAKGSAFKDLIKKREKINITGGSSEASAEGTKHSYSDSERAAFADWINYVLQDDADCKTYLPIVTSSDSDDMFEKMKDGILLCKMINVSVPQTVDERTINKGKLNAFKIHENQILVVNSANAIGCSVVNIGAEDLSKGKHHLTLGLLWQIIRIGLFSKISLAANPNIAALLREGESLNDLMSLSPEELLLRWVNYHLEKAGSNKRINNFSSDIKDSEAYAILLHRIAPEPNMIDRPESIMGVGNLTKRAEIFLGNADKIKMRKFLRAKDIVEGNPKLNLAFVANLFNNFPALDLEEVEEEFEPYEENREEKTFRNWMNSMGVN…	617	68.6	5.48	0	188.936	292.35	39	18	89	18	0	6.50805e+07	3.81885e+07
Res_017720-T1	MHLLGLCVAVLLAFAGKNLADTPARVLIPFGEAALWASSLDAVKECKKGDCDGEVKVGIPQAQKYALNNARMAIKNGKEKKTVDGYLEKIDKLLFEVAKLDDLDTEGKKFDKIFVKVMKSFLKLFQDATLVKLLKESKVILEIPSDDIGLMWRSASYDIPIYKKEDLKKGLTETKFKMRDGVEIPRVGFGTWQMEGDECKNAVLEALRIGYRHIDTAQSYENEGAVGDALKEAISEGIINSRDDVFLVTKLSDPREYSAKKVSKRLMAQLELLKTNYTDVYMLHGPEEKKKNRATWKGMIQLQNEGKIRALGISNFDTVTDLKDLARNFHIKPNYIQNKFSIYNPGGQSVEQTSMLQTAEEREMAFVAYSIINPWPFALPPREDPHVLAIAKRYNRTPV…	481	54.3	7.49	0	188.763	214.96	62	22	66	22	0	4.59054e+07	2.04238e+07
Res_012758-T1	MALAKLARIKRIQDATKLVLQSRHFHDVSKAGIIQSTIERESSEFQENKKSMLSLVKDLKDMVYVIKDGGGSKAKERVTSSGKLLPRERIGQLLDPGSAFLEFSQLAGYKLYKDEVPCGGIITGIGTVSGTECLIVANDPTVKGGTYYPITVKKHVRAQEIARENRLPCIYLVDSGGAFLPLQADVFPDRDHFGRIFYNQATMSSLGIPQIAVVLGSCTAGGAYIPAMADESIIVKEQGTIFLGGPPLVQAATGEVISAEKLGGADLHCRNSGVTDHYALDDFHALHLARQCIGNLNRKKDISFMNVSESIDPIYPADDLYGIVGDNLKKSFDVREVIARIVDGSKFDEFKAMYGDTLVTGFASIHGYPVGIIGNNGVLFSESALKGTHFIELCCQRKI…	566	61.6	7.83	0	188.641	223.97	49	20	82	20	0	6.46597e+07	4.19435e+07
Res_001016-T1	MARVHCLVVVPFIFLCIFVVKVHSLSFTLSAGTKKCLREEVHKDVLVTGEFRLSEAPIKTHLTVVDTNNHVLYKKQDAQKGKFAFTTDDYDMFEVCFESEGQHGQGIDREIFLDVKTGVEAKNYDDLAKVEKLKPMELELKKLEDLSEAIVNDFAYMRSREEEMRDTNESTNARVLYFMVVQSLIRLFIKGDLISPTANRRKWSLLVIKVIWNQDEVFRCIPAFGSSESAENHPTSLLQIKFLESTSDLPVNPKKFAMKSRRGVMQELHFLLKNVEFLTEGQCKITDIDESGKVNALRFVVKIVPDSGPYRFGKFDFLFKVTRSYPTICPDIRCLTHIYHPNIDESGEICLSLFEDWSPEYNCLMHCVYGLLFLLKNPNLDDPLSPYFCPEDANCLESF…	430	49.5	5.96	0	186.595	386.04	21	14	106	14	0	1.37347e+08	8.67639e+07
Res_010094-T1	MAQQLGDFAKRFGSGAPKGVGLGLKLLIGAGAIGYGIKESIYTVDGGHRAIIFSRIGGVQPGVYAEGIHFRIPWFQWPIIYDIRSRPRRISSPTGSKDLQMVNISLRVLARPVAENLPVMYQRLGTDYDERVLPSICNEVLKSVVAQFNASQLITMRQEVSLLMRRQLTDRARDFDIILDDVSITDLSFGREYTAAVESKQVAQQEAQRAAFLVERAIQERQQKVVQAEVFLIFPLTMSHIGKAVKENPGYLKLRKIRAAQRVAHVISQSNNKVYLNAGQLMLNIQDTEDIDKALGNMVTIEERRKKK	308	34.5	9.79	0	185.808	229.3	58	16	83	16	0	7.79218e+07	4.22948e+07
Res_007270-T1	MAFFSIILALFVFQCIDVTNGKSDSKYVRINVDAKWPSTPLVLEASEFIGTLDDGKFWEFIESFNNSEAKENTLGIYNSILDASSKLLADLEMDMMKFSLSLRSFSPLIQVYRQLLRETDIPDCEVLFLVEDKLFCDFDELATYISSTKNGSKTTVHTFDHVYPGTDDNSVVVVVLYGAVGSSAFLQAHNSMKGLANSGKAKYIFRHYLKDDLEGKVHLSGYGVELAVKSTEYKAVDDQKVEGKDKGKEAGSHHDDEDEVEGFLFNRLRDKHPEFVENLDNFRSYLKESTKELAPLKVWQLQDLSFQAAQRIMSSSPDQRLKVLRDISQNIPMLARSLVKTSVKEELRNEIKDNQRQFQESHIDVGEAAVFINGIQVQVDSIDGFSLEKLLMSEMVTMK…	988	111.8	5.57	0	184.146	213.59	39	26	71	26	0	3.5045e+07	1.97468e+07
Res_004360-T1	MPKKPAAPKFVEKLKDVEVSEGKAARIECVVSGEPEPDIDWTFEGQPIKEGGRFKFYFEKDDVVGVEVKNVSVDDEGFYECIATNKSGKATSKCELLVNAPGKIVNAPESADVKPGGTATFKCKYDGNPRPDVKWFKGSKQIKDADHYILTNKSQVATLEIDGVKDDDYGDYKVVVSNEYGDTEHAFSLKGGKKDDANGPSTSAKTAFQERNADRVYKPPVRKTKKKKFPIERDGILNENPEKYYDFGEEIGRGKFSVVKHCVHKKTGEEFAAKIIKFDDETVKFAVREYDLMASGKMDHRGLVQLHEAYLVRKYLILILELAAGQTLLTYMSKRHSLTEDDVAHIIRQMCEILADMHKNNLIHLDIRPTNIRMASIGSKEIKLVDFNSARMIANKFAG…	563	63.7	5.3	0	183.913	199.59	38	23	85	23	0	7.03955e+07	4.49798e+07
Res_013726-T1	MNLVIFKFLLVLSTQLIIQEIVAMKLLKLEDKVKKALDKGKTDKAKKYLRYFGYLSGDFNTEQDMKKSLKGFQYYAGIPMTGQLDDATVNQMQKPRCGMKDPKISFEVGRRRRYNLQGAKWEFPEGSDRTLTWYLKNSGSSIGYQRMRFVVHEALSKWQKVANINFKESPRSDKADIFVSFGSGHHGDHYPFDGPGGTLAHAFYPLAGYDIGGDMHFDNDETFTYKKNYGSDIMWVTVHEAGHSLGLEHSYEKSAIMYAWYQGGYKGDFDLTPDDIRGIQHLYGKRPETPATPPPTTTQEPTTTQPPTTTQEPTTTQEPTTTQEPTTTQRPTTTQMPPEPPTTTQVPDPPTTTQSPPEPPTTTQSPPEPPTTTQSPPEPRKPHGMKDCMSKIDAAVHDP…	621	70	9.14	0	183.874	343.44	37	23	160	23	0	1.5756e+08	7.70381e+07
Res_008526-T1	MDLTKLNLEFLELKKETIINIAKKAVLPLTFIPVIWIIFFRRSFLSEGKKVKVKKSFKEEDENGDDDYSLQNLSLPRLYGWRLKLFSKIGSSIFGKAFIVPVSMKQSNMDVLRTLLFPEKPVLYPLQPAKTKAVDVNDGKMDIDLSSFAQEKAKAVDGFRFNTISDYINAYRSGKTTPTDVAKHVISTLEALDKTDPPMCVIIQSNKQEILDMAEASTARYKNNAPLSVFDGVPVTAKDELKIAGYRCYNGASFLGETVETEETEAMVMKKLRNGGAVIIGVANMHQLGMGTTGCNGSRLHGTSRNPYNPDHFCGGSSSGSGAAVACGLVPMAIGVDGGGSVRIPASVCGAVGVKATFGRISSSGVFQFSDTVGYVGPMCTTVRDAALSYAFMAGPDPR…	634	69.8	6.55	0	183.618	259.95	52	23	91	23	0	8.01458e+07	4.73854e+07
Res_008109-T1	MAMSIPRTVLQSMMKEGAKHYSGLDEAVYRNLEACKQFTDITRSSYGPNGMNKMVINHLEKLFVTNDAATVIKELEVQHPAAKMIVMAANMQEQEAGDGTNFVLIFAGALLREAEKLLRMGLSPSEVVDGFDIALKRALEILPDLVCANAKNLRDPSEVAKFIKPTIASKQYGNEDFLSELIAKACISIYRQDGSFNVDSVRVSKILGSGMHASEVVRGMVFQREAEGDIRKVENAKIAVFSCALDSATTDTKGTVLIKAAEELMNFSKGEEDLLEAQIRGVAETGVNMIVSGGKVADMALHFCNKYKIMVLRLNSKFDLRRLSRAVQAIILPKITVPTAEEIGHCDHVTAAEIGEAPVTIFRQEREETAVSTIVVRGATQNILDDIERSIDDGVNTFK…	543	59.3	5.63	0	183.155	207.6	38	20	65	20	0	5.22793e+07	2.71567e+07
Res_012755-T1	MKATDSGIRLPAFLPKLSHDKQVLALKLIILSIAVILSFSTRLFSVLRFESVIHEFDPYFNFRTTKYLAEEGFYQFHNWFDDRAWYPLGRIIGGTIYPGLMVTSAVFYHIMHFLNITIEVRNVCVFLAPFFSSLTVIVTYFLTKELKDAGAGLIAASMIAIVPGYISRSVAGSYDNEGIAIFCMLLTYLLWVKSVKTGSLAWSSLCALAYFYMVSSWGGYVFLINLIPLHVLILMVTGRFSHRIYVAYSTVYCLGTILSMQISFVGFQPVQSSEHMAAFGVFGLCQIYAFIDYLRYRLTGPYFQILFKSLMLIGLAIATVLGVILTITGKVSPWTGRFYSLLDPSYAKNNIPIIASVSEHQPTTWCSFYFDLQLHVFMFPVGLYYCFSKLTDANIFIVM…	713	81.1	7.81	0	182.912	261.74	28	18	89	17	1	6.34353e+07	3.80551e+07
Res_003202-T1	MSAPVGYNSGGMPPQQGGYPPQQGGYPEKQSGYPPEQGGMPPQQGGYPPQQGGMPPQQGGYPPQQGGMPPQQGGYPPQQGAYPQGGYPPGQGSPPANTEPSAPPSFETVAGYENAQGFDFVPAGPPPAYTPANQPQECPAENFNAAGHITDAQATDALLQFVSEHCCYGKGAANNMNIKDMKASNALHYKLESFTETRTFNWHQEPYIGQVIDGPMNGRAPGAWEIQVQQPRFFDPTTLYQEIPHTASVQLCNHCVGTGQNKCKHCHGRGKERCTSCGGSGHVNRAEGRENCVFCHGHGTRNCMHCHGRGLVTCTTCNGKGKLKHYLRLKVQWEIKASDHVVEKTDMPDELVTQVSGVELFAQEFPRVFPLTSFYEQEINTASQQLVNQHAGFAQSSVL…	942	103.8	6.7	0	181.53	264.66	28	16	78	16	0	8.14257e+07	3.96221e+07
Res_002410-T2	MRPLHLLIFCCAVSASFAKILIQDGEKEIKLQKRGGAEIIGIATSEKDSGESGTTRKRLVAYLDFEKFNGATASDESGFDNNAQMSTGALVAKIPDSNCGNVAYLWCVDISFQSTEFQAKPKVAVTVAAWIYLVKIDGSHSIFHTVGATHPMGQYHFEVNYGNVRWFHRNESQNVVFETEAHAVKPHEWTHIAGTYNASTGFANIFINGEIKNHSVGNGYLSRDWGAEAKIGNNKMNRPLSGLIDEFRIYNYALSPEEIKQLFEKCKFGSGANNLNEKTGGGRSDGIAGIAGDGGAGGESKSDVAADEKGPSADNKVEFKPEKTKGKAKEQASESSSNNNNSNSNNNNNSESSKDSVLKKSTIHT	365	39.5	6.9	0	180.838	399.35	45	13	119	13	0	1.90066e+08	1.05062e+08
Res_004232-T1	MAKLLSGNRNGISKIACQAMRASLAARCYSPASSVPNTKLLIDGKFIESQTNEWIPLYNPATNEVIGQVPKATQGEMEAAANAAAKAFPAWSNTSILARQQIMFKFQHLIKENMDKLAANVTLEQGKTIPDAEGDVMRGLQVVEHACSVTSLQLGETLPSISRDMDTHSYRVPIGVCGGVCPFNFPAMIPLWMFPLAIVCGNTYVMKPSEQDPGAAMMLAELAQQAGVPDGVLNVIHGAKESVDFICDNPTIKAISFVGSDFVGQYIYERGSKNGKRVQSNMGAKNHGVVMPDANKEMTLNQLVGAAFGAAGQRCMALSTAVFVGEAKEWIPELVERARKLKVNAGDQPGADLGPLISPAAKQRVLDLVQSGIDEGAKIDLDGRGISVPGYEKGNFVGP…	531	56.9	6.7	0	180.34	187.68	45	20	70	20	0	5.89132e+07	3.51019e+07
Res_012307-T1	MFAKYILISSLFTIVLECSMSTDVFTSTADMESLALTERGLTFALHKYLETEQNRLTALKQFLSRAQTSIQQVNKTSAGEFVGNPINSYLLLKRFWVDWKNMEELVTKDFSEDVMSTIENARPFFPSFDDYKGAMTAIIRLQDTYHLRADSLAEGVLPGIRRSASLSINDMFELGRHAYELKDWFHTKGWMEACLKKMGNMNIKDGIRRFDVLDHIAFSEYNRGNIRRALAATQEMLKIEPGDTRVLGNMLYYKESLQYMKATGQRGDTGSLDESVKKVVKRSASKQDEWKERKSTMDYERLCRGETRKLTLKEKQKLVCWYQANAPRTKLKPLRVERVWVSPEIFLFRGILSESEIQKIKELATPRLNRATIQDPNTGELKVADYRISKSAWLKYDSH…	542	61.9	8.44	0	178.032	149.41	43	25	72	25	0	4.89145e+07	2.68711e+07
Res_005526-T1	MSNQTGSNIQEKNGAVYRCPISGSSCINMAIDDGTPAFDEIKTGQWMGASLYSMGADQGIIACAPRFIDKPHGSVWLHGRCGFVDGKTFQAGTTFWNPCEFHRNQGNTAFGYCETGFSLAYSSGFVAVGIPGVMQVQGRLAVQYLSNILGGSINFLPTSGDRLDLGDTMGFSISWGNFSGSKHGDIVGGAPNGSNRKGKVLIYSLHGQLPIFAVIENTDTTMAIGSYFGSVVCGVDLTNDGISDLVVGAPFYSAVSDEGKVYVYTTSSQSGVTLKGSMLGDRTPGAKFGSSIASAGDLNNDKYNDLVVGAPYGGPDGKGAIYIYHGSANGIGNGYEPVQKIYASTLGGMPATFGFSVAGGMDVDVNGFPDLVIGSFGADKIHIFKSKPVLKTTATLKTD…	951	102.4	7.11	0	177.085	189.01	34	22	62	22	0	4.54725e+07	2.99551e+07
Res_005238-T1	MLGTQHRLTRACFQLGEILHRNIFQRAQTCVRYSCCKLRTIPVAEGRLNGSLHSIAKPRISSALNISLRIGFQKFAKMSTNEDSNVPLDENGKPLSKNALKKLEKEKKKAEVKAEKQAKQAAEEAQAAGEDISKDNYGLAPLIQSQMKSDRVWTRVNEITLDKAGKKILVRGRLHTSRGAGKQCFIVLRQQQYSIQVIVAAGDSISKQMVKFATNITKESIIDVEGVIKSVDPKVQSCSQDDVEVHVEKIFVISAASPRLPLLIEDASRPETDEALAHVNQDTRLDNRIIDLRTITNQALYRLQGAVCLLFREYLGSQNFVEIHTPKIISAASEGGANVFTVSYFKNNAYLAQSPQLYKQMAIAADFERVFTIGAVFRAEDSNTHRHLCEFVGLDLEMN…	606	68.4	8.29	0	176.382	163.31	51	25	73	25	0	4.09712e+07	3.57997e+07
Res_003780-T1	MACSRAVFIVAAKRTPFGTFGGKLKDTTATTMGYMASVAALEAGKVDPSIVDSVVFGNVIQSSTDAAYIARHVGLRANIPIETPALTVNRLCGSSFQSIVSGAQDILLGDASVALVGGSESMSQAPYAVRGTRFGTKLGSEPRMEDTLWAGLTDEHIKLPMAITAENLAEMYGVTRLDCDEFAIQSQQRWANAQEKGHFKEEIAPVTLKTRKGDQIFDVDEHPKPATTLEGLSKLPPVFKKNGTVTAGNASGISDGACALILASEEACAKHNLTPLARLVSYGIAGVDPSIMGIGPAPAVRKALKAANLELKDMALVEVNEAFAPQFLGVARELSLDMEITNVSGGAIALGHPLAASGGRITGHLVHELRRRGEKYAIGSACIGGGQGIAVVLENIQ	397	41.6	6.54	0	176.121	230.23	62	19	74	19	0	5.13527e+07	3.28005e+07
Res_009441-T1	MASVSSKILGCVRKVPSLSLSRFASQAAASRVISAPKVHFNQVFINNEFQDAVSGKVFPTVDPSTGDVICHVAEGDKADVDIAVKAAQEAFKLGSPWRTMDASGRGRLLNRLADLMERDKEYLAALESLDNGKPFSDAYNADLSLSVNCLRYYAGWADKIHGKTIPVDGNFFNYTRREPIGVVGQIIPWNFPLLMQAWKLGPALATGNVVVMKLAEQTPLTGLYVANLIREAGFPPGVVNIIPGYGPTAGNAIAEHMFVDKVAFTGSTEVGKLIQQAAGRSNLKNVTLELGGKSPNIVFGDVNVDEAVELSHFALFFNQGQCCCAGSRTFVEESIYDEFVAKSVERAKKRILGNPLDTSTTQGPQVDSEQMSKIIELIESGKKEGASLQCGGGQVGDKG…	521	56.2	6.39	0	175.861	247.69	52	21	86	19	2	7.34328e+07	4.2289e+07
Res_003671-T1	MASLKTFAVQKNGGLMVVLIQRNFCAWSKATHHGIKCMIFQRTLKTAQVDENSKRHGGELVAEVLQSHGVKNVFTLCGGHISPILVACEQKGIKVIDTRHEVNAVFAADAVARLSGTVGVAAVTAGPGLTNTVTAVKNAQMAESPLLLMGGAAATLLKGRGALQDIDQMCLFKPLCKYTATIKRVADIIPTLKKALQAAQSGTPGPVFVEFPIDVLYPYHLVKREAGIKENPVGLLPKIVNWYITRHVNNLFAGAWEKRDSSPLPVDIPMPSDNQVSEAISIIKKAKKPLILLGSQATLPPVSADKLQQAIEALGIPCFLGGMSRGLLGRNSPLHIRQRRRDALKEADAVILAGTVCDFRLSYGRVLNRKSKIIAVNRDKTQLMKNASVFWNPNLAVQA…	635	68.6	8.92	0	175.465	161.8	41	18	54	18	0	2.61973e+07	1.77518e+07
Res_005517-T1	MKQHLFGVLLVKVFKRRISGKTQFKLRPLEKVVTNLKLATMIWIPIAAFLIAGAIGQSQNGSPIDVPVQFVTERHIFGDAFETNHFSAHLCGGCMFDKKLAVVALNLQKQPWNNTVQDILKATVTYGSGKIIASNNINGTYEEQISFVYHSSYGDLNIVVENGAGSGMIYTVALKFHAQTYGNPECEKRHLMSLVESRAHWKYRALSGVNAAQLHELVPIFKMSSQYSVKSSDLVFLQLDYCFPHIGNYNVTISVIAEDEESAFATYACTKSIKQCKTGNAPFHDTSGSAANTVQVRVAGAPDIGPITVIVRGDGRYLQMNTFSLAASKYIEL	333	36.7	8.69	0	175.434	1216.3	41	14	449	14	0	2.35629e+09	1.44443e+09
Res_002166-T1	MANEQGSMNPINILKYGAEEEKAESARMSSFVGAIAIGDLVKTTLGPKGMDKILISSSRSESIQITNDGATILRSVGIDNPAGKVLVDISKVQDDEVGDGTTTVAVLASELLREAEKLIACKIHPQTIILGWRKAVKVAEKALASHAVDHSSNAEKFKEDLTNIARTTLSSKILTQHKEKFAKLAVDAVLRLKGSCDLNAIQVIKKLGGSLEDSFLDEGFLLDKKIGVNQPKRIENAKILIANTPMDADKIKVFGSKVKVDSVAKVAELEVAEKEKMKDKVDLILKHDINCFINRQLIYNYPEQLFADNGVMAIEHADFEGVERLALVTGGEIVSTFGKPELVKLGKCKLIEEIMIGEDKLIHFSGVAMGEACSVVLRGATQQILDEAERSLHDALCVL…	536	58	5.83	0	175.256	181.05	49	18	57	18	0	2.31347e+08	1.11087e+08
Res_000744-T1	MASSEELKLGKVVIEGKTKVVYELPEYTTKSCVLLQSKDKISCGDGARMDKMEGKAALSTSTTSAIFEYLNAVGVKTHFIKRHTDTSFISKHCEMIPLEVVCRRIATGSFLKRNPGVKEGFRFSPPLLETFFKDDANHDPQWSREQCLEASLTHGGVTIGRHELDHMGDSAKAIFEILEKAWNSRNCALVDMKIEFGVDVETKEIIVADVIDNDSWRLWQAGDKRLMRDKQVYRNLKEVTTEAMAEIKKNYQWVSDQAQQLITRPFARVVIMMGSASDLEHGKKIEKHLQCFGIPAEIRVSSAHKGTEETLRILRWYEGHQIPTVFIAIAGRSNGLGPVLSGNTAYPVINCPPIKADWGAHDVWSSLRLPSGLGCTTILDTEGAALAAAQILGMENHMI…	426	47.6	7.68	0	175.162	182.92	44	18	69	18	0	8.03514e+07	4.76789e+07
Res_014401-T1	MAAFRVTRALAGTCSNLAPNVRMFSLGCKNLQEFQYIITEKAGENGNVGVVKLNRPKALNALCDDLMKDLVKGLDMFEDDKSVGAIVLTGSERAFAAGADIREMQGLDCSRVLSGNFLTHWNRLANCKKPTIAAVNGFALGGGCEIAMMCDIIYAGENAKFGQPEILLGTIPGAGGTQRLARAVGKSKCMEMVLTGDKISANEALQFGLVSKVCPVKEVVNEAIKLATKIASNSKLITQLCKEAVNTGYEVSLSEGIHFEKRIFHATFATNDRREGMTAFLEKRTPEFTDS	291	31.3	7.99	0	174.711	222.66	56	14	81	14	0	8.26909e+07	4.81813e+07
Res_012696-T1	MAATSQLESLVTRLEQVTTRLENVSLKSKGTGGQSAVIDDVPEFVEEFDQFLGGTVANYMKLSSEIGDDVKTQADLVDGVFKLQRQFLLVAGKHSMPSQDELMKLLKPTSEKITTVQEFREKNRKSKLFNHLSIISEGIPALGWVAVSPKPANYVKDMIESAQFYINRVIKDYKESNPKHVEWARSFLKILTDLQEYVKQYHGIGVFWNKEGTPATSGALQGTPAGGAAAPAAPAAPAAPPAGAPPPPPPPAIDPPAPAPATSGGSDQAGKSALFAALNKGSDITKGLKKVTKDMQTHKNPNLRGGSTVPAKSSATITAPKPFKPNAPVKKPPVMELRDKKWIVEFQEGRKDLVISEVNRNQTVYVYKCNNIVLQIKGKLNSVTLDSCTKSAVVVDDLV…	488	52.7	8.63	0	174.34	188.2	47	25	80	25	0	4.93631e+07	2.69377e+07
Res_012616-T1	MAPQPDVVVKVEKGKGSTAGAEFIRPGNVQKKGVNAILLGPPGAGKGTQAPKLAKEYCACHLATGDMLRAVVASGSMLGKTVKQVMDAGKLVSDELVVQMIDESLAKPECKNGFLLDGFPRNVTQAEKLDELLEKRKTSLDSVIEFGIDDELLVKRITGRLLHRASGRTYHTEFNPPKVEMKDDVTGEPLVRRSDDNEETLRKRLVTYHAQTSPLVDYYKKRNLHTRVNASLAPNLVFASIQAAFGAARSQQAA	254	27.6	9.06	0	174.22	246.69	63	14	78	14	0	5.31305e+07	2.94667e+07
Res_007479-T1	MAVSQVRQNYHEECEAMVNMQINLELYASYVYMSMAQYFDRDDVALPNFAKFFKHSSDEEREHAEILMKFQNQRGGRIKLSDVKTPSKDEWGSGLQAMEEALALEKKVNQSLLDLHTRASTHNDPQMTDFIEGKFLTHQVESIKEIAGHVTNLKRVGTGLGEYLFDKETLGE	172	19.7	5.4	0	173.649	353.84	55	12	97	12	0	1.01128e+08	6.63075e+07
Res_013110-T1	MSGCLGNIGAKMIFLILGLLAFVNAEVGKRHVRFEYKLSFKGPHLVNKQGNIPFWKHYGSAIAGDEQVRITPSLKDQKGSVWAKSKNTNEFWEIEVFFKVTGRGRVGGDGLAVWYTEETGSSGPVFGASDNWKGMGLFFDSYDNDGENNNPYVMVMLNDGTKSYDHFKDGSSQQLGGCMRDFRNRPNPVRAKVRYFNNVLTVFFHNGMSNRDDEYELCMRAENVNLPKEGFFGVSAATGGLADDHDVLKFLTYSLKVPTEEKKPAKEISEEERKKLEQQYDQYAQQLEKEKETFKTQHPEKFKDQEGRYENAYDRDVRLIYEGQASIHSLVGTLHGKTGELTTQVNNLHNTVAKIQAGGSVGASTGGGISRQEFNSMINSQNELKNVIYNMKTQMESLQ…	483	54.5	8.03	0	172.38	204.68	49	17	70	17	0	4.35461e+07	2.90432e+07
Res_003310-T1	MKRRLMTDMKRTVVTTIVLLALVATTSLADMSAGTKNKINTGISSGKGVVDFLSKLGDPKTQKVFDSLGKMASFLGAAGGLISFALLFVPQQDSAELKYMKEKFAEVNMKLDQITSELDNVKDLITYENQRAVYVSSAAKILYGHKRLQEFLNEIQKTSCSGTSACNRIRARIASRYVNDFNVKSDIFKIINGATKTTSAFGDPLLNLVGSKFKCHIVKIDQFSNSILKLSFKAQQVILAHEKLTGSSLSITQSMDNWLKGIYDLRDKTTTVKTACFQNIGNQMIADINEKQYQVGVSSNDAANIAVKTFLDDKYPWLGWVVYSYGAYGGSKHQVTNVNGAFWNMPNDQNERKRNIIVSFTDKHGTYANQKYKMLNAIDEIIKSTNFYSVRNDAGKLLP…	1090	123.5	8.84	0	172.338	184.72	29	23	60	12	10	4.09405e+07	2.01035e+07
Res_005605-T1	MIPRRRFTELAKCTARLTRRDLQNALSIGVRSLSSNASTESNLSLRETLARLVPEKRREVQEFRKQHGDTKIGDVTVGMAYGGMRGIKGMICETSVLDPMEGIRFRGYTIPECQEMLPKADGGNEPLPEGIFWLLLTGEVPTKAQVDEISKEWAARAELPQHVVMMLNNFPDDLHPMSQFGAAVTALNNQSKFAKAYHDGVSKKDYWEYTYEDSMDLIAKLPVIAAVIYRNLYKDGKVACLDPNGDWGANLTNMLGYDNPTFTELMRLYLVIHSDHEGGNVSAHTTHLVGSALSDPYLSFAAGMNGLAGPLHGLANQEVLLFINKLVQDIGPDASQEQVKEYCLTTLKTGVIPGYGHAVLRKTDPRYTCQREFAMKHLPDDPMFKIVSNLYDVVPPLLQ…	476	52.8	7.15	0	171.533	264.02	53	18	90	18	0	116427486	66978221
Res_013129-T1	MFRKMKMKMQEAVGLPIFLWLIVSVSCTELTFELEDNAKQCFHEVIKKDTKCTLEFQVVTGGHYDVDVTLKDPQGKILYDQKKKQYDSHQFKAEVEGEYIFCFGNEFSSFAHKTVYLDFQAGEEPPILASMGKEHTALTQIETSSSNIHEALKVVIDYQTHHRLREMTGREEAEYLNERVQYWSIGQTVLIILISLLQIGVFLVIVRKVQPVYGEYTFCFGNEFSSFSHKTVYFDMQNGEAPPLPAMPHEDPKFGAMTQLETSAVNIHEALKVIIDYQTHYKLRMATGRNVAEYLFDRVKYWSLGQTVLMVLVAAGQVYTLRNFFAEKKETI	332	38.3	6.28	0	171.468	290.48	45	14	92	14	0	6.76124e+07	4.39539e+07
Res_004789-T2	MSEKPFAEVESFDTHKLKHVETQEKNPLPTSDVIKEEAADSRAEVKSFDHGKLKHVETEEKNPLPTPQTLKEEMRPEELPDVSGVSSFDTSKLKHVETQEKNVLPTADVIQEEATDSRAEVKSFDHGKLKHVETEEKNPLPTPQTLKEEMRPEELPDVSGVSSFDTSKLKHVETQEKNVLPTANVIKEEAVDSRAEVKSFDSSKLKHVDTVEKNPLPTPQTLKEEMRPETLPDVSVVKDFDASKLKHVETQEKVVLPTKEVIKKESFECRAEVKTFDTSKLRSVKTRVRNTLPTPQILRAELRPEKLPDISSIRNFDCRLLKHVEVRERNLLPSLDVIQEEAADSRAEVKSFDHGKLKHVETAEKNPLPTQADIKEELRPDVLPDVSGVKDFDSKKLKH…	533	60.4	5.82	0	170.952	142.06	46	20	43	4	0	2.82302e+06	1.57882e+06
Res_011562-T1	MCSEAELYANDIILFNKQDEDVEEKIKEQIKAIKLPVLEVIGDLEDREKKLKDRLQECGAFQDQFDDFERRLKNIDERIEQQKQKPLSSNPARITMTIGEIDSIGKDFMEELQLYRIVQKSGKQVLDTLDTESEWKQLKGHLDETTKLWDAIDKKIDTEKDHVTKVKELSVEFFNKKNDVLKWLDENEKRFMTLEPESCEWEKLSKQQKEINSVQSDIDHHKTYMERLETLIDELEDACGEDVEELHEISGDIKEKWKRAESLLLNRKETIAAMQDKMRRFGDLKRPVEDTLKKIKAKLGDLSFTGADEGRIRQVSEDVSKIQKQADDLEPRLDLLDNMASEIQEEHISSDCKPLRDEVAELKEGFDELFNAVSSKAESISGVIADLDSLTDTATSTET…	2671	307.5	5.45	0	170.661	135.02	17	31	57	31	0	2.15133e+07	1.23496e+07
Res_005835-T1	MDFFGNFFKSTFARSVALCDAPLFDYTVKRANPDDLRVVFYKYASVEENGERYMTPHDFVRDFLQMDAACFNDLTFKLFTGCVDQTKDGLISFPEFQAFEALLCKPDAKYRLLFQLFDLDGKGSITFGEFQHVVKSCLPYAKFPFDFSTDFTRAFFGEEKNLSLSYTDFTHFMQEFERQYLKQAFSQQLKKGRKDATITALQFGDIVRSLLAHKLSSYTAENIPSLASDSGSRRITLMFCLGFNELLDNLPSIQQLFKQLTQDDKFKSVTKEEVLRQAQRNRQVTPLQIEILFQLCGLANPGVGKISLADVNQLVPKQNPLTVFSKIHEIKKYDIKGKESDKEVKRSFGVQALESLYRFGLGSLAGAAGATTVYPIDLVKTRMQNQRSVLASELMYKNS…	697	77.9	8.75	0	170.55	218.83	38	23	80	23	0	6.05093e+07	3.21832e+07
Res_008825-T1	MALRAFTRRLRDASKVPKFLQDQALIGNQAAPVVNAGLQKREYSNGGKIKVDKPIVEIDGDEMTRIIWAKIKEKLIFPFLDLDCKYFDLGLPYRDETNDQVTIDAAEAMKEYNVGVKCATITPDEARVKEFNLKKMWRSPNGTLRNILGGTVFREPIVCKTIPRLVPGWEMPIIIGRHAFGDQYRATDLVVSGPGNFSLTFTPADGGNSTSISVFDFKDSGGVILGMYNTDESIKDFAHSCFNYALSKQWPLYMSTKNTILKRYDGRFKDIFQEIYEASYKSKFEALQIWYEHRLIDDMVAYALKSSGGFVWACKNYDGDVQSDTLAQGFGSLGLMSSVLISPDGKTVESEAAHGTVTRHYREHQKGRETSTNPIASIYAWTRGLLHRAKLDGNKDLTV…	458	51.5	7.15	0	169.848	226.05	47	17	83	16	1	9.27124e+07	4.86012e+07
Res_010743-T1	MMPRLREIKGRLITVSVSHVRRITTSRLCTQQHSTYKPPQDEDLQMPECDFQPQPYKGMSYEKALELRKKNLSPALLTYYKKPLHAHQGYMQWIFDADGKRYLDMFAGIVTVSIGHCHPRVNAALKSQVDRLWHTTNIYMNSQISLAGEKLASKMPGDLKVVYFVNSGSEANDLATLMARAYTRSFDIINLRNSYHGTSPSLLGILAQTNWKQNVPLNFGYSAAMNPDVYRGIWGGKNCRDSPVQTSRDCDCNPGQCKACDGYVGQLQEVLDYAVSSRIAAFFAEPIQGVGGTVQYPKGYLKQVYEKVRSRGGLCIADEVQTGFGRTGEHYWGFQGHDVIPDIVTMAKGIGNGFPMAAVVTTPEIARSITTGIHFNTFGGNPVASEVASTVMDVIDEEK…	509	56.6	8.37	0	168.985	168.29	54	18	58	18	0	5.32079e+07	2.46042e+07
Res_006421-T1	MAENIDYSDIVHHLRLSFNQGKIRPVEQRIQQLKQFLKMMTENKELFVEALHQDLRKPAFEATMMEYTVVVAELTKFIDNLPSWAAFQRTDADLMNKFNTCGIQYEPYGVALIIGAWNYPLLLLLQPLIGCIGAGNCAVLKPSELSPVTASLIESLVPRYLDEDCFRVIAGGKDETSALLRERFDYMFYTGGHVVGQIVMQAAAKYLTPVTLELGGKSPCYVDGDCNFDITARRIVWGKYVNCGQTCLAPDYILCTKETEEKLTLSLKKALKEFYGENPKESKDLARIINERHFQRIRNLINQEKVVIGGDVDEDEKYISPTVMTDVTSEDAVMKEEIFGPLLPIVKVISATEAVKFINKREKPLALYVFSKTQSIIDKFINETSSGAVCVNDSIVQAA…	500	56.4	7.52	0	168.792	218.06	41	22	100	22	0	8.29143e+07	4.90086e+07
Res_016229-T1	MDGDHPYHNMGVESPPINNSYKITTEKKLQQNKQLARIFFSLFLVCLVLLICAVVFKFGCPSKVATSREKSQSPVIKFLHVSDIHLDLQYNNSLSKKSLCRNLVNITSETAPFQALYGRVRCDSPEILVESALGFMRNLSLTKLGKIDFFMFTGDQVAHAIGRDYGNSTIMERVLNNMRAASNKIALAFSGIPIFPSFGNNDLPGDYVLPKDSKFYEDVLAFWQPLVLCKNCSFKVTTEEELKKTFLAGGYYKAAIPPLKLVLLQLNSNYWNVECIKRNPKGQTLVIADAQMKWLENQLQIAKSADNKVIISGHIPPGINAYGAFDGFWAQNYTQKYVDLVTKTYSDTVIGQLFGHIHKDDLRLQMLNDKAGSVDTHSSFVFTAPGITPIYNNNPGFRV…	518	59.1	8.7	0	166.619	195.65	44	17	69	13	4	5.50647e+07	3.20048e+07
Res_011937-T1	MTKLGLWSLIALAVLGSLTDARSAKRNVLGHKKAVKPADPVPAVAFAADGKLSETTRRKLLAEINKYRLMHGVSPLGYCPVCETDAQKWVEAIAKDGHVRADVNSTRGQTAFKLKSDAVVAKGGDYLGTLIAASWYNQIKNYDFQRNEFKGMASDFTQLVWKESGVIGFGSKKAADGTYYVIAYYAPGGNNETLGFRDNVNRVTGAGDLDQSQLKCPDQWQLNGKACYRFFEQKLSWGDAVDHCNVLKGSLVSVECPDDNIYVKAMSVEKKADIAWIGMSDMATKGTYQYVDGTPFVFSDFTIDAYNWHASNMDNARGKCISLNVTNSGWQYSDCNTVLPFICKLKPNGVLSFAVQLYFPGSSYTSDLIDSTQPRYINLKSTIEKAVNETYGKDIWFAG…	575	63.4	8.48	0	165.452	250.34	39	23	105	23	0	7.51774e+07	4.18986e+07
Res_013732-T1	MLVGVSLVLFPLVLQAVFGFQCGKDEGKLQVHLVPHTHDDVGWLKTVDEYYYGANNSIQHAGVQYILDSVVASLLQNKERTFIYVEMAFFTRWWNQQNDQMKQIVKNLVKNRQLEFINGGWCMNDEAATHYNAIIDQMSLGLRFINETFGAEARPTVAWHIDPFGHSAEQASLFSMMSFDGFFFGRIDEEDKQTRLKEQRMEMVWRGSRAFEKLTQIFTGELYNGYGPPGGFCFDEFCGDPPIMDDKRMFDFNVKERVDTFVKEVCDQATHYKTNNVILTMGSDFMYENANLWYKNLDKLIKYVNEDGRVNVFYSSPSRYLKALHNAGKTWGVKTDDFFPYAHCPHCYWTGYFTSRPALKGYIRKNNNLLQVCKQMETIKGPTGEYPSSESLRKAMAVN…	656	74.4	6.54	0	164.958	169.5	35	17	61	17	0	3.33153e+07	1.9091e+07
Res_009782-T1	MADCHASAMKYFLISVLINSNYHSNLGVGGELFSLGSLQISSGTHLEDPEDNSEDYLDELKRARPGFNNVDENGHLDSNSLFTVYEDDEPLSKEMEENDDEDKDYDKTDDVNIARGNHARKPLCLTKECVIAAAEILSTMNPSADPCHDFYDYVCGNIKLKEPFEDMTRTMSFETLRRQNNYILHTILKEMPTKNGSSAIDKVKRLYDSCIASEHNSADNIKALKKMVDDYGPWPLAQASKWTKNWSFQKKFNEISLQFGRSPLFSLSVTLDEKEPSSHTLQLQQAGLLLPRDYYISNDPTKSKVYQSYCMFMLNIMKLLGYNKSYQISMLKDVQDFERKLAKISIPATELRKADRMYKRVSIGGLMKLLPEIEWKKFIATYLELAGYKLSDAKYVVLY…	800	92.2	8.98	0	164.397	154.95	30	22	66	22	0	3.73298e+07	1.93899e+07
Res_003741-T1	MPVFHTKTIEAILEPVAQQVSQLVILHEESESGTPIPDLSVPIQAVGAAVQHLIVVGQQTLKQSKDKVLKQEMPVAFQRVEESSKFLIEASILLKQDPFSKEAKKKLINGARGILSGTSTLLLTFDDAEVRKILKSCKSLLEYLRVSELVETMPDLITFVKNLTPGVTETCKMVDGRQADLTHQVHRDLLIKHTTSVKKTLPLLISAMKAFVTTLERGGQGRAEAQENRNFLITRIIDDILEIMRVLQLKVYDEEEAEDPTTEMRKAQGIIVGKMDQARDWLSNPSADANGLGERAIRDILKQARSVGEASNDPRINKVCTELDQLMDNLSAYRARGQGNSPEALRLAEEIGKRLEYLQVLVDDAISKEAASGKKLPAPTTKARLEQALMWIDDPTGQK…	939	103.1	6.76	0	164.212	162.31	37	28	64	28	0	2.99383e+07	1.67242e+07
Res_015529-T1	MGFVKVIKNKAYFKRFQVKFKRRREGRTDYYARRRLVIQDKNKYNTPKYRMIVRFTNKDVICQIAYAKLEGDVIICAAYAHELPRYGVKVGLTNYAAAYCTGLLLARRLLAKLNLADIYKGCEAPDGNEYCVEGEEGQPGPFRCYLDVGLARTTTGAKVFGVLKGAVDGGLDIPHSNKRFPGYDNEAKEFDPEVHRNHIFGQHVASYMKSLQEDDDDAFKRQFSKFIENGITHDNVEEMYKKAHAAIRADPSPKQAEPKEKKEGEKQKRWNRKKMTLAQKRNRVAQKKASFLKKIAAEEEEED	303	34.8	9.41	0	163.727	242.82	42	15	89	15	0	5.30786e+07	3.93358e+07
Res_002572-T1	MPQAGPFLVAFAAAAIFVGISIHKIDEGHVGVYYRGGALLKGTSGPGYHIMIPFITSYKTVQTTLQTDEIKNVPCGTSGGVVIYFDRIEVVNQLQAEYVHLTVKNYTADYDKTLIFNKIHHELNQFCSVHTLQEVYIDLFDQIDENLKIALQRDLVTMSPGLQVQAVRVTKPKIPETIRRNYELMEGEKTKLLITNQHQKVVEKEAETERKKAIIEAQKVASVAEIQYKQKIMEKESQQKISQIEDLTHLAKEKALADAHFYKTSRETEANKLKLTPEFLEYVRIQAIASNNKIYYGDKIPNMFIGNDFKPREKKITA	318	36.2	8.25	0	163.363	208.52	45	16	90	16	0	1.20495e+08	6.57903e+07
Res_013638-T1	MAALTGASRLTLQASKQALKASYGQLCQKQLGAVSVMQKRYLNLQEYQSKKLMARYGINIQRFEVASSVQEALDSAHYLIQGVKELVIKAQILAGGRGKGTFSSGLKGGVHLTENPDDVKALAEGMLGHNLVTKQTPPSGVLVNKISVAQALDIARETYLAILMDRESNGPVIVASPEGGMDIEEVAEKYPEKIFKEYINIETGLTNDQALRLATNLGFKDDLHGYAALQIKRLYNLFIGVDATQVEVNPFGETPDGQVVCFDAKINFDDNAEFRQKSVFQMDDKSETDPREVQAAKYNLNYIGMEGNIACLVNGAGLAMATMDIIKLHGGNPANFLDLGGGIREDGVYQAFKIITSDNRVKAILVNIFGGIVDCAIIAKGITKANRGLDLGVPIIVRL…	436	47.1	5.82	0	160.129	176.79	60	23	67	23	0	4.29091e+07	2.11124e+07
Res_001293-T1	MPAAPGSAKGNRNVAFKDKEKPVMVRESNITAAKAVADAIRTSLGPKGMDKMIKGGDGNVTITNDGATILKKMQVLHPVAKMLVELSKAQDVEAGDGTTSVVVIAGSLLNAASRLLDKGIHPTIISESFQKAAGKAMEFITEISTPVDLSDRDSLLKSATTSLNSKVVSQYSSLLAPMSVDAVLKVIDPTKDSNVDLRDINVVTKLGGTIEDTELVNGLVLSQKISHLAGGVNRVEKAKIGLIQFCISPPKTDMENNVIVSDYTQMDRVLREERQYILDICKKIKKAGCNVLLIQKSILRDAITDMGLHFLAKMKIMVVRDVERDEVEFICKTIGCRPIASLDHFTPEMLASADLVEECSTGVEKVVKVTGIQNPGRTVSILVRGSNKLVLDEAERSIH…	533	57.5	8.16	0	159.776	176.7	52	18	59	18	0	2.91951e+07	1.33026e+07
Res_000169-T2	MSFVEERTSEDVASNNSWRKWSAGSTLASMVGLIPEDLQRKQDENIIHEREAEGKAADNMSSKKDNTMVDVDVIPEDGLDAKTLFGCGDGLTYDDFIILPGYIDFTANDVSLSSALTKNINLKTPLVSSPMDTVTESEMAKTLALLGGIGIIHHNCTVEFQANEVHKVKRFEQGFILEPIVLSPSHSVKDALELKRRFGFSGFPVTDNGKVGGELLGMVTHRDTDFVTQEEHQNSVTEVMTPREELVVGQAGIHLREANTILQKSKKGKLPIINAEGKLVSLISRTDLKKNREFPLASKDDRKQLRVGAAISTHPEDRQRLEALVQAGVDVVVLDSSQGNSSYQIERIKEIKQKYPQIDVIGGNVVTVSQAKNLIDAGVDALRIGMGSGSICITQEIMA…	574	62.5	6.86	0	158.418	179.15	43	18	60	18	0	3.04396e+07	1.88696e+07
Res_010665-T1	MAERTNQSKYIVLLFGLIASSFINGLDVNVREDATVGSTLLSSFPAPDSGFVYSVFGDGDQLASSLFGVSPSGKITVRKKLNYVNGGRNKYELIAVRRKDGTTIGGKAEVARISVIDVNDHVPVFKKSDYQGHIYEGSAAGSVVRGLEDCFATDQDSSGVSKYLITSGNDANLFAAKVKDISGLKLLQIVTTRSLDREALGNTPISLQVQAVDGGNPEKKSAIATIRIKVLDRNDNGPVFDETNWRATIQENSPVMTSVVKVKASDNDEGSNKQLYYYFSTEQDDFVIDPYTGVIYVAAPLSYNKKNSYNIKVSVTDRAVQDPKTSTSEVHISLVQASNYPPASVTNTAPQFATSLYEIKVRGDLPLKAFVLLPRATDSDGIGNSNGRLSFSLSPVSTT…	3999	436.7	6.24	0	158.221	120.92	11	30	52	30	0	1.62057e+07	9.32921e+06
Res_000472-T2	MRSSIFGTFTKHLLPISLGKIPATRSYGSLLLTKSRNFQKSRFQFKKIERLKMATNIEQEIDVKSFSDKADKAEKEIALLKAQIELISRKIGDPSFDEPSEDLQKLITENAKLKYQKTHLERAIMDQKAQVEKKMPNLKLTITSLFSKSIQLAYPDIDDVQTLVQAAQSDKFGDYQCNSAMVIAKKLKTQGKPSNPREIAQEIINKLPENNVIEKVEIAGPGFINIILKKDVILGILDDILKRGVLPPGIGAPKRVVVDFSSPNIAKEMHVGHLRSTIIGESLCRLLEYIGHDVLRLNHVGDWGTQFGMLIAHLEDQFPDFRTTSPPIGDLQSFYKARFPCSFVASKKRFDQEEDFKKRAYQRVVELQGGQPDIVKAWQLICNESRKEFQKIYDRLEIT…	730	83.2	8.28	0	157.726	148.58	34	21	61	21	0	3.06811e+07	1.34893e+07
Res_007306-T1	MASTDVKDAQPGNSDSYDVTIKDSKTGGKKSKKAELDDLKKEIEFDDHKVPIEELVDRLGADVDTGMSKERAAEILARDGPNALSPPKQTPEIIKFLKQLFGGFSMLLWIGAVLCFLAYGIRVAREAEPALDEFYLGCVLAGVVIITGCFSYYQEAKSSRIMESFKKMIPQEALVLRAGDKLVMPAEDVVLGDIVFVKFGDRIPADLRILEAKGFKVDNSSLTGESEPQQRSPEFTNDNPLETKNIAFFSTNAVEGTAKGIVIATGDRTVMGRIAHLASGLGVGKTPIAKEIEHFINIITGVAVFLGVSFFIISISMQYEWLEAVIFLIGIIVANVPEGLLATVTVCLTLTAKKMAAKNCLVKHLEAVETLGSTSVICSDKTGTLTQNRMTVAHMWFDN…	1027	113.6	5.64	0	155.665	145.78	22	19	51	19	0	3.14346e+07	1.29973e+07
Res_010600-T1	MDFVTRVTLYLVLSFFTNYAVSYRIPGGFRDNTLDRTRRMSKREDIVMFDNPKAISESLTDEKVNYVRNRKLSQTRSEVPDDDIDALVVPDENSPFGSLAESANRRTDTKKIASNVVSESSINEMKPSAIYDTTSGTNLHSTGVQRTPQDGAGEQTAEEKPAEEKPAEEKPAEEKPAEEKPAEEKPAEEKPAEEKPAEEKPAEEKPTEEKPAEEKPTEEKPAEEKPAEEKPAEEKPAEEKPAEEKPAEEKPAEGVQGEATPPTQQPTTKTPFDAEFHHQLEHGIFGKFAHDDKKPNYASNASSQLSRILANGSNDMHVSGEQKQSVEVEDPTVPKTAPLPSAPAVPDQPQPQGGASLFDELLNDNSAGTPVQQSPPQPTVRTGPVTTLKPQTITPPANT…	4799	518.1	5.36	0	155.36	141.14	7	22	50	1	0	1.69192e+06	764067
Res_010600-T2	MKLFVPTGVDSQGKATGYDAKQVFPPYRYVKEVAGKKLVPVYSGDKVIALVPPGPHLRQNNTARARRRGLIPNPPLNMAQLRKQTAYNPPSKKDLAVHLEFDQFEGDLLLDTSGHENNARPSGSATRMVANHSCGMAERLIGGQIEFDGEKFAPKPKSAVSIAVWVKLKSSKGRQSIFYTVGGGQYNLASEDGKIVWSHIGDDNNIIFRLVTLNEYLQPDKWAHVAATYDAVEGKAKVYVNSKFIHSETGAGILSQNWSKAAVIGDETGVMELQGIIDEFYIYTKALSHPEILNLAQSCVYGIPSPKWGLKKPCANCKGASTTQAPTTKATSNYTTPISTKATSNYTTPTTQGMTTTQTPPTTLTTLTTASTTPAATTGSTKVSETTTHIIDETTPTTT…	6219	675.3	6.2	0	155.298	132.15	6	22	46	1	13	2.1202e+07	1.33487e+07
Res_006315-T1	MHSLRRIVPNGQIISKAFSTANASNNKVAVLGAAGGIGQPLALLLKHSPLINHLALYDIVNTPGVAADLSHIETGSKVSAHQGQEQLEDAVRDCNLVLIPAGMPRKPGMTRDDLFNTNASIVKNLVEACAKAAPKAILGIITNPVNSTVPIASEVYKKHGVYDPARIFGVTTLDVVRSNTFISELKNLDVSKTNIPVVGGHSGITILPLLSQVTPKVQFSNEELEALTERIQNAGTEVVNAKAGAGSATLSMAFAGARFAFSVLDALAGKKGVVECAYVKSDVTAATYFATPLLLGPNGLDKNLGMGDLSEFEKKKLEEALPELQKNIAKGEEFVKNNP	339	35.8	7.9	0	154.71	171.2	66	18	48	18	0	4.91359e+07	3.62983e+07
Res_002326-T1	MLSRVAAISKTGKKSLQLARALPRLVSTTNTPKSPDAAVDDPPSKSVWEVYKEKAGVSAATIFGAGLTATLLSKEILIIHEETLLAAVMGGTIFFLARKFGKQVGEALDEQSQNILDAMNEGRNARIKAYEEAIADEKSVEAVYSCRDQIYEVLKENNSMKMELEYRENVNKVYEEVKKRLDFQVELQQLKKNLEQEHIVSWLENVVVKSITPQQEKDALAQCIKDVKLLAVSRA	235	26.2	6.61	0	153.973	201.84	63	14	70	14	0	7.30031e+07	3.95319e+07
Res_005375-T1	MAQMLAFDEFGRPFLILNDQENQKRLTGLDAIKSHILAAKTVSHILKSSLGPKGMDKILVSPDGEITITNDGATILEMMDVEHQIAKLMVQLSKSQDDEIGDGTTGVVVLAGALLEHAEQLLDKGIHPIRVADGYEHAAEIAIKELEKISDSFPFDKDNKEFLIETAMTTLGSKIVSRCQRQMAEIAVDAILSVADIDRKDVDFELIKVQTKEGGELDDTMLVKGVIVDKDFSHPQMPKEIKDAKIAILTCPFEPPKPKTKNSLQISCVEDYRKLRKYEQEKFQEMIKQVKDSGANLALCQWGFDDEANHLLLQNDLPAVRWVGGPEIELIAIATGGRIVPRFSELTADKLGHAGIVRELSFGTTKDKMLVIEKCKNTRAVTIFIRGGNRMILEEAKRS…	539	59.6	5.87	0	153.727	167.93	47	19	53	19	0	2.69822e+07	1.39421e+07
Res_013876-T1	MASDPALLKAKEKAKENFSFSEPENFFSDLPKGDLVAFARARDEWYHARIVEVEMIKIYRERLEKCYARDPVNHKQNCRKMALEYLAAWDNYRDNKTYIRTPGGNIDRFKPTIEEMKDFVKNR	123	14.6	8.72	0	153.293	221.82	71	14	70	14	0	5.51916e+07	3.59513e+07
Res_002955-T1	MVGVMAEIKKIMKFSILFTVLFLEACSALYFHMGETEKKCFLEEIPDETMVTGKYKTQLFDETTHDFMPASPGIGMHVEVTDPDKKILLSKYYASEGRFTFTSHTPGEHTICLHSNSTKWSLFAGGKLRVHLQLLVGEHANDYPQIAAKDKLTELQLRMRQLLDQVDQITKEQSYQRYREERFRYTSESTNQRVLWWAIVQTVVLLVTGFWQMRHLKGFFEAKKLV	226	26.3	7.93	0	152.574	204.52	61	12	56	12	0	7.22583e+07	4.56594e+07
Res_005584-T1	MILLEINNSIVEDALRLRFGGGKAESIDIKVADFDGALYHLSNPEGDKTKILVSISLKFYGELSKHGADELLKSIYGEYMTQPEPGFNVSLLFDLNALPEDKEGLIKKVGLLKRNCFASVFEKYFDLVGKDETRERAVINYRDDETLYVEAKADRVTVIFSTVFKDDDDVIIGKVFMQEFKEGRKASHGSPQVLFSHKDPPQELQGTDAAKGENIGYITFVLEPRHTNEKIRENTINLIHTFRNYLHYHIKCSKAYLHSRMRARTSEFIKVLNRARPEKVTEKKTMSGKTFSRN	294	33.6	7.97	0	152.498	209.83	59	18	85	18	0	4.93188e+07	3.41796e+07
Res_014075-T1	MFRLVAKQRTAIGAEIGKHVRAIATSPFLSNMVPMSKFDPNNAINYEKMDSNLKIIKDRLQRPLTLSEKVLYSHIDDPINQDIERGKSYLKLRPDRVAMQDATAQMAMLQFISSGLQRVAVPSTIHCDHLIEAQLGGDKDLARAKDINKEVYNFLASAGAKYGVGFWKPGSGIIHQIVLENYAFPGVLLIGTDSHTPNGGGLGGLCIGVGGADAVDVMAGLPWELKCPKVIGVKLTGKLSGWTSPKDVILKVAGILTVKGGTGAIVEYHGPGVDSISCTGMGTICNMGAEIGATTSVFPFGPSMARFLHASNRSSISDLAAKYQHILSPDENAPYDELIEINLSELEPHVNGPFTPDLAHPIGKLGENAKANGWPTDIKVGLIGSCTNSSYEDMTRAAS…	781	84.4	6.37	0	152.116	138.57	35	20	53	20	0	2.93466e+07	1.48258e+07
Res_012528-T1	MAGLLLGGERTTGKDIRTENVMAVAAVANIVKSSLGPVGLDKMLVDDVGDVTITNDGATILKLLEVEHPAAKVLCELADLQDQEVGDGTTSVVIIAAELLKNANELIKFKIHPTSIISGYRLACREACKYIQEHLSVSTDEIGTDCFLNVAKTSMSSKLVGVDSDFFAEMIVNAVTAVKRTNTKGEVKIPVKAVNILKAHGGNMKQSTLVGGYALNCTVACEGMPKKVTNAKIACLDFSLQKAKMNLGVHVLIDDPEKLDAIRNREADITKERIQKILASGANVILTTGGIDDLCLKYFVEAGAMAVRRCRKPDLKRISRATGATIVVSLANLEGEESFDASLLGHADEVVQERICDDELILIKSPKVKSAASIILRGANDFMLDEMERSLHDSLCAVK…	554	59.5	6.89	0	152.037	114	40	16	43	16	0	2.1138e+07	1.01048e+07
Res_000647-T1	MMGWQHYLYLFAVVELKLCYSSEMEQNLPRGHLQPLGGHADPDTVPEFNPGSYPTPEEFWKKFVKPSKPAVFRGATKSWGGYTKWTDEYLIKNYGDFELRLEGRKEKFGRTPYGVLGVGRDTMEHFVKSYHNPDHKGYIVTELPEPMYHEAGVLPFMTCGTFRHQMVEVDFWMNGGNASSVLHKDAFNTVNCLLNGTKEWKLIALEQEKNIYKAWEAAPSFGGYSKINVHSVDLHKYPKVSQVPWQFTKIEKGDCLFLPKGMYHNVLSYGSNNVAVALLFSRFDRYKKRDLDFSDCDNVTQESKPLSDFIVDWMYPGKGDLSMGNADLEDVRIGMLENVNKKGIYTLKRLIKAVHKIYSEKDIKFARDYATKAYETLTNGAENLTQEMIRAFSKEKLRV…	579	66.8	5.27	0	151.759	135.08	41	19	41	8	10	28018533	1.59807e+07
Res_006532-T1	MSLLRHGIAALKRPLAANGYSGILKLHHRSIACSSAVLQSTATSTNPGNLRDAWKKSSFDKEKMIALLDHDNHEMRNQFREFVSDPVMVPIYNIALADERDLAMQRLKRICDAGFISVLDFVNNPLRIFAAHELAAIIDPAMTTKMTVQFNLFGGTILKLGTERHHKLLLKGIDSLDDVGCFGLTELGYGNNAVEMETTAIYDPATKEFIVNTPTTVAQKYWITNGAVHAKWAVVFSQLYTDDKCHGIHGVLVRIRDDNLKPMPGVRIEDMGYKMSGNGVDNAKLFFDNVRVPRENLLNLYSDVSEDGKFTSKIDGNRKRFLTVADQLLSGRICIASMSMGASKAALTIALRYSATRLTVGPKGKSDTPILAYQLQQRALMPLLARTYAINLALDYVKD…	653	72.5	6.83	0	151.096	129.06	44	21	58	21	0	3.50158e+07	2.17958e+07
Res_007549-T1	MRSDKSAAGVTVGDPVLRTGKPLSVELGPGIMGSIFDGIQRPLKDICEMTQSIYIPRGVNTDSLSKATQWDFSPMQLKVGTHVTGGDIFGTVHENSLIKHKIMLHPKARGTVTYVAEAGSYNIDDVILETEFEGEKTKHTMLQIWPVRQMRPCTEKLAGNHPLLTGQRVLDALFPCVQGGTTAIPGAFGCGKTVISQSLSKYSNSDVIIYVGCGERGNEMSEVLRDFPELSVEIGGVVESIMKRTALVANTSNMPVAAREASIYTGITLSEYFRDMGYNVSMMADSTSRWAEALREISGRLAEMPADSGYPAYLAARLASFYERAGRVKCLGNPEREGSVSIVGAVSPPGGDFADPVTSATLGIVQVFWGLDKKLAQRKHFPSINWLISYSKYMRALDE…	555	61.5	6.16	0	150.744	169.05	50	18	55	17	1	4.12666e+07	2.40099e+07
Res_004586-T1	MAMRQPAAVIDNGTGYTKLGFAGNTEPQYIMPSAIAVKETAKLGGKGSIRGVDDLDFHIGDSALDIPSYSTKWPIRHGIVEDWDLMERFWEQCIFKYLRAEPEDHYFLLTEPPLNTPENREYTAEIMFESFNVPGLYIAVQAVLALAASWTSRQVGERTLTGTVIDSGDGVTHVIPVAEGYVIGSCIKHIPIAGRDITYFIQQLLRERETGIPVEQSLETAKAIKERFCYTSPDIAKEFNKYDSDPAKWIKQYDGVNSVTRKPFSVDVGYERFLGPEIFFHPEFSNPDFTTSISEAVDVVIQNCPIDVRRPLYKNIVLSGGSTMFRDFGRRLQRDVKRVVDARLKQSEALSQGRIKPKPIDVAVITHSMQRYAVWFGGSMLASTPEFYSVCHTKEQYDE…	415	46.6	6.01	0	150.691	216.35	46	14	68	14	0	7.23642e+07	4.44859e+07
Res_003318-T1	MGRLTVLALLGVILCGGYVNGQCKKRDIIALIELTPGDRYAGTYVSSFVASLKRLFDPKPECTRLGVMVVWTQVEKVIDLKCDYRGCFANGQQEIRRISRLSGRTQTAFNKKILADGLQAVASQFVTKGRENVDKLLLLVLTNAPTAGAPKTQDEIKDMLDLRVSILVVAVAGGRKEKLGEIASPSHYQVDFKSMSQLVANGHSEIAQLISLPLGQPAVGFAAVEDPNTNRLLKEDAASTCENIVDIAFIVDSSGSVKKYYNQEKFFVKRIATRFNIIETGTHGGVILFSSHGYVKTHIRFKDFLTTEAFNEAVQNLPFYGYQTRIDHALELAHRELYTVAGGNRPNVKKLLFLITDGRQNPDSINGVRLDPAKEAEKLHLSNVQIYAVGIGSKVNVSE…	559	61.2	8.85	0	150.572	182.43	36	18	61	17	0	4.12807e+07	1.97177e+07
Res_008276-T1	MATTTRPMLLLFVIVGAVFCKDKDDDSCRTYAGGQVYPQEVKTGHDHALHWSKALISQPAPYWEGKAVVDGEFKDLKLTDFKGKYLVFFFYPLDFTFVCPTEIIAYSDRVEEFKKLNTEVVACSVDSVFTHLAWINTPRKQGGLGKMRIPILADLTKQIAKDYGVLLENEGHTLRGLFIIDGNGILRQITMNDLPVGRSVDETLRLVQAFQYTDKHGEVCPAGWKPGADTIVPDPKEKLNYFTKQKEEM	249	28.1	6.54	0	150.332	383.22	55	19	159	19	0	3.19293e+08	2.0108e+08
Res_011906-T1	MGIAKLVFLLLLGVSAMEVFGKPMQSGKTSAVVQKGGATQRVLCGNQKAAAQDKKRKRRFITRGIRWEKKTITWSLKNFTPHLNPLITLILTRRAFNEWEKYSALTFKEVSTGNADIEISFEPKKHFLYGSLYCDMEFDGPGGTVGHAFYPIKHAVYGGNIHLDVDEKFSADGRSGFNFGSTIMHEIGHSLGLLHSNHYYSIMHPEYAMKAEGDYIPLTVDDIEGIQSIYGPPDLKEKSKQEDEIMNTVEEESQPSQEKTQSMSKSVAQTTSTTVPSQDKPNNAVTENESKSSTDPISRKPVEFKKIIDGKKNKEKTVTNTGISVVDSRPAKAQKHEAWQSHSHNDSEHTDLESSSLDRSAKCPRTVDAMFVSKFDKQTYIFSGKYMYSIGNWLGYEGK…	567	64.6	9	0	150.095	233.25	28	19	89	19	0	1.21842e+08	6.33828e+07
Res_003493-T1	MSKMFSKIISSKVLFTTVLFLILRLARGLPKGGNSDDGTIPDEKWGYVTVRASAHMFWWLYGGQSNATPRTSLPLIIWLQGGPGGSGTGFGNFKEIGPIDDKLQKRNTSWVQVANLLFIDNPVGTGFSYVDDMNALTTNISQIAEDLLTLMKSFVAALPIFEKLPIYIFSESYGGKMTAAFGARLHDAIASGEIKCTLGGVALGDSWISPVDSVVTWGPYLYQYNLLDQKDLTSVMQVAAETIKAVEAGEYLEATALWARTEDVIDAVTDSVNVYNVLQHHAPSPMTLMKIKDDTPLGRLYGKHVQVYQLESLSDFMNTYIRKKLGIIPQNVIWGGQSSLVFKYQSREFMKPVTKEVSKLLSAGVTVVVFQGQLDMICDTAGAELWLKKLTWSKMPMYF…	458	50.8	7.91	0	150.032	185.44	38	15	72	15	0	3.97766e+07	2.49185e+07
Res_015611-T1	MKAIVFDAPGGAEVLKVKEVKQPEPGENEVLVKVHAIGVNPVETYIRASMFGPVPTPHILGSDCAGEVEGVGENVKRFKKGDRVWTCHLTNNGAGTYAEFVSVPEENVYQLPDNTSYKHGAALGIPFLTAAQALFQLSNSKPGETVLIHGASGGVGLPAVMFAKNHGMKVIGTASTEDGIQLVKEAGAHHVFNHRSKDYVDQIKEVTGGNGPNVIIEMLANSNLQKDMDMIATLGRIVIIGNRGKCEVDASPVMTKMLQIRGVLLFIVPKEEMNENAARISTGLEMGWLKASVGKEYTMEQAAEAHREQIEGKAKGKIIINVR	323	34.7	6.86	0	149.265	161.88	51	14	48	14	0	2.97933e+07	2.01503e+07
Res_016420-T1	MSASRIPQLGLKIRQFGLRFSGAKRVTCGLGLLGSREGRKLGLATAARCCSSSSFSIKEILPPQDAFAQRHIGPRKSERDDMLRFLELENINDLINLTVPETIRLQNELSLDNPLSEQECLARLRDFGRKNQVWRSYIGMGYYNCIVPTSILRDVLENKGWTTQYTPYQPEIAQGRLECLLNYQTMVSDLTALDMANSSLLDEATAAAEAMALAHRFNKKRKFYVDQNCHPQTIALVKTRARTTGKGVEVIVGDWRSFDFSAKDISGVLFQYPDTNGLLEDFSDLVSAAHAGNALAICATDLLALTMIRPPGEFGCDVAVGSSQRFGVPLGYGGPHAAFFAVRDKLKRMMPGRVIGISKDSSGNPCYRLALQTREQHIRRDKATSNICTAQALLANMSA…	1026	113.7	7.15	0	148.595	131.28	23	20	52	20	0	2.1126e+07	1.43132e+07
Res_002593-T1	MGEQMRLKGTLKGHTGWVEQIATTPLTPDQILSCSRDKTLILWELTRDEMNYGFPKRCLKGHNHFVSDVVMSSDGQFALSGSWDNTLRLWDLNTGKTTRRFVGHTKDVMSVAFSADNRQIVSGSRDKTIKLWNTLGVCKYTITDDSHTEWVSAVRFSPNTSNPIIVSAGWDKVVKVWNLTNCKLKTNHYGHNGYLNTVTVSPDGSLCASGGKDGLAMLWDLNDGKHLYTLDSGDAISALCFSPNRYWLCAATGPSIKIWDLESKSVVDELKLEVISMSSGKDKGADCKSLAWSADGQTLFAGYTDNVIRVWQVQKNV	317	35.2	7.91	0	148.575	232.84	49	17	93	17	0	8.23014e+07	4.66542e+07
Res_013887-T1	MPGKDVFELVQCPVTCHAFNSDRSRVAISPNDQTVIIFKKIGNKWEKEAVLDEHQQTVTSVDWAPNSNRIVSCGVDRNAYVWTEQDGQWKPTLVIVRLNRAATFVKWSPKEDKFAVASGARLISVCYFEKENDWWVSKHIKKPIRSTVLSLDWHPNNVLIAAGSSDFKARVFSAYIKEIESKPTETVWGKKMPFGSCMVEYSNGGGGWVHSVAFSPSGNKLAWVGHDSSISFVDGEKKEVETLRGQFLPFLSCLWITENTVAAAGHDFLPMLFVVSGDGKLSFMAKLDAAIQKEAEAMSAMAKFRSMDKQALGSASAKSVTTHANAIKQLCFYGGPRENVEQISSCGMDGRVVVWHLKTLEKSMEDLKIV	370	41.1	8.09	0	146.685	119.47	46	14	40	14	0	2.41564e+07	1.55632e+07
Res_011148-T1	MASTLSPQEEQDKLLEEAVQIVKTQSFQMKRCLDKAKIMDALKHASNMLGELRTSLLSPKSYYELYMSVSDELSHLELYLVDEFSKGRKVNDLYELVQYAGNIIPRLYLIITVGVVYIKSGEVARKDILKDLVEMCRGVQHPLRGLFLRNFLLQSTRGNLPDADGSVKNSETDGSIKDSVDFILLNFAEMNKLWVRMQHQGHSRDREKRERERQELRILVGTNLVRLSQLEGIDMEMYKKDVLPGVLEQVICCKDPIAQEYLMECIIQVFPDEFHLQTLNAFLKSCADLHQSVNVKNIIIALIDRLAMFAYRGDGSGEPQDIKLFEIFSQQVPHAVQGDGAGIPEDIRLFEIFSQQVAHVIQSRSDMATEDIVALQVSLINLALKCYPDRVDYVDKVLE…	827	94.6	5.12	0	146.332	137.87	44	25	59	25	0	2.85152e+07	1.42678e+07
Res_011202-T1	MKSVIVSIFAAFISACLAGDVAELTASNFDAVALDPNKDVLVEFFAPWCGHCKRLAPVYEKVAQTFKNDKNCVVASVDADDSVNRPLSEKYGISGFPTIKFFPKDNKDGEEYNGGRDEQDLIDFLNKKCKLHRRAGGALNEMEGRIDKFDELAKRFMTEIAKRDDIVKEATAAVDGEADQKAAQYYVRVMQKILEKGDSYPKTESERLERMLSGQMSSTKVDGVYRRKNVLDQFVVAVKEEL	242	27.1	5.64	0	145.894	202.06	45	14	60	14	0	4.03085e+07	2.21375e+07
Res_006589-T2	MEDRQEAIYLAKLAEQAERYDEMVDAMKKVAGMKENLSFEERNLLSVAYKNVIGARRASWRIISGIEQKEEKNPEKLQMIKAYREAVEKEIADICNDILNVIDNFLLKHLDESASDADEAKVFYLKMKGDYHRYQAEFASGDERKQAAEKSLVAYKSANQTANDKLNPTHPIRLGLALNFSVFYYEILVSPDRACRLAKTAFDEAIAELDTLSEDSYKDSTLIMQLLRDNLTLWTSDVEAEEGKGDTVIQDMEDQDA	257	29.3	4.82	0	144.875	122.03	76	16	49	6	0	1.58055e+07	1.10834e+07
Res_008306-T1	MPENHNESVPLKENGIAAEEAMVTAIVKPRHKWTKYQKLHLAITLVLLAVCIALIGIYVIELSSRKDNECKRGKKATVKAKRVCESPECVSIAAQVLTYANHNADPCKNFYDYACGGWTNRRYIPDSKPFWDTFSDLSESNDELLKNLLTNKKPNATSPAEGQLYNLYASCMNTSAIDALALKPLRNLLEKTGLLGALTGTWDEASWDMIETLVKVHSVFSPLVYMETEIPLFDIRVAVDILDSNRQIIKISQPRGTILSYSGGNNQAFGGVFADAIVNVVKQLGGKDIDNVKADVTKLDNEIERALIPNDQYRKVQESRIKITIKQLNEDTNKTFDWLRYLKLAFNNSGVPITEDTSVAIQPLLYLKRITAVLSKASKKTVANYFIWSLIAEMKDYLP…	761	85.7	8.73	0	144.193	131.28	30	17	47	17	0	1.82854e+07	9.20603e+06
[truncated: 2,852 more rows]

## Sheet: Table S4_Proteome_S. malayensis
Accession	Sequence	# AAs	MW [kDa]	calc. pI	Exp. q-value: Combined	Sum PEP Score	Score Sequest HT: Sequest HT	Coverage [%]	# Peptides	# PSMs	# Unique Peptides	# Razor Peptides	Abundance: F1: Sample	Abundance: F2: Sample
[truncated: 3,559 more rows]

[truncated: 4 more sheets: Table S5_Toxin_R.esculentum, Table S6_Toxin_S.malayensis, Table S7_InterProScan_R.es, Table S8_InterProScan_S.ma]
